# Supplementary material for: Synthesis of α-heterofunctionalized carbonyl compounds via Brønsted acid-catalyzed oxygenative coupling of ynamides
Source: Royal Society of Chemistry journal article supplement (doi:10.1039/d3qo02134c), 2024-01-01

Appendix:

Copies of  $^1\text{H}$  and  $^{13}\text{C}$  NMR

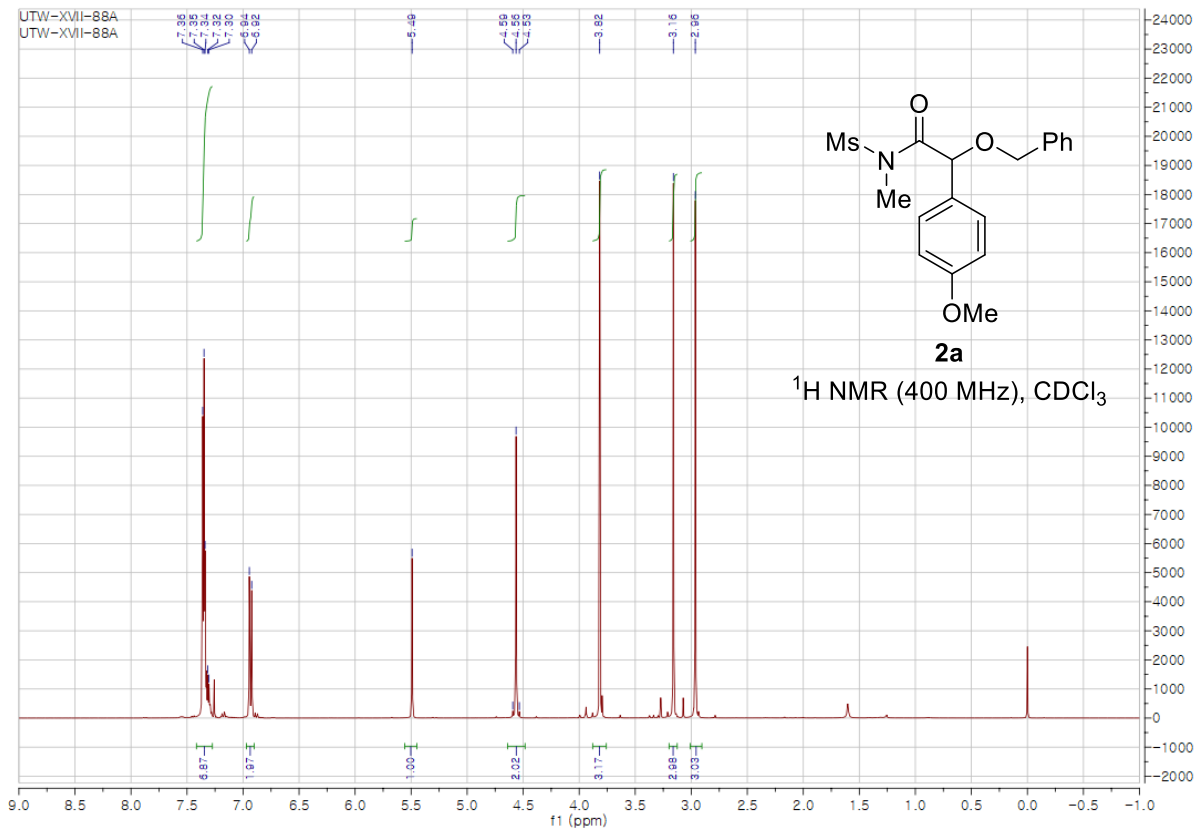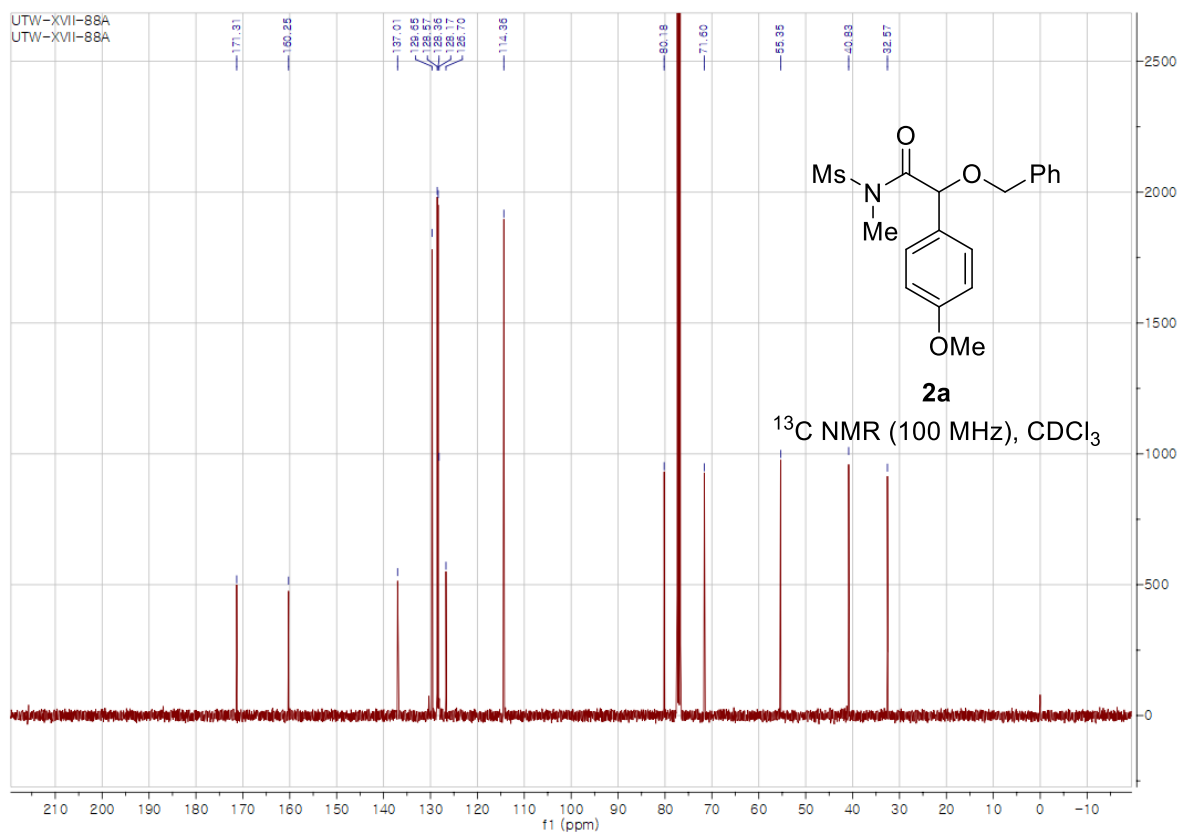

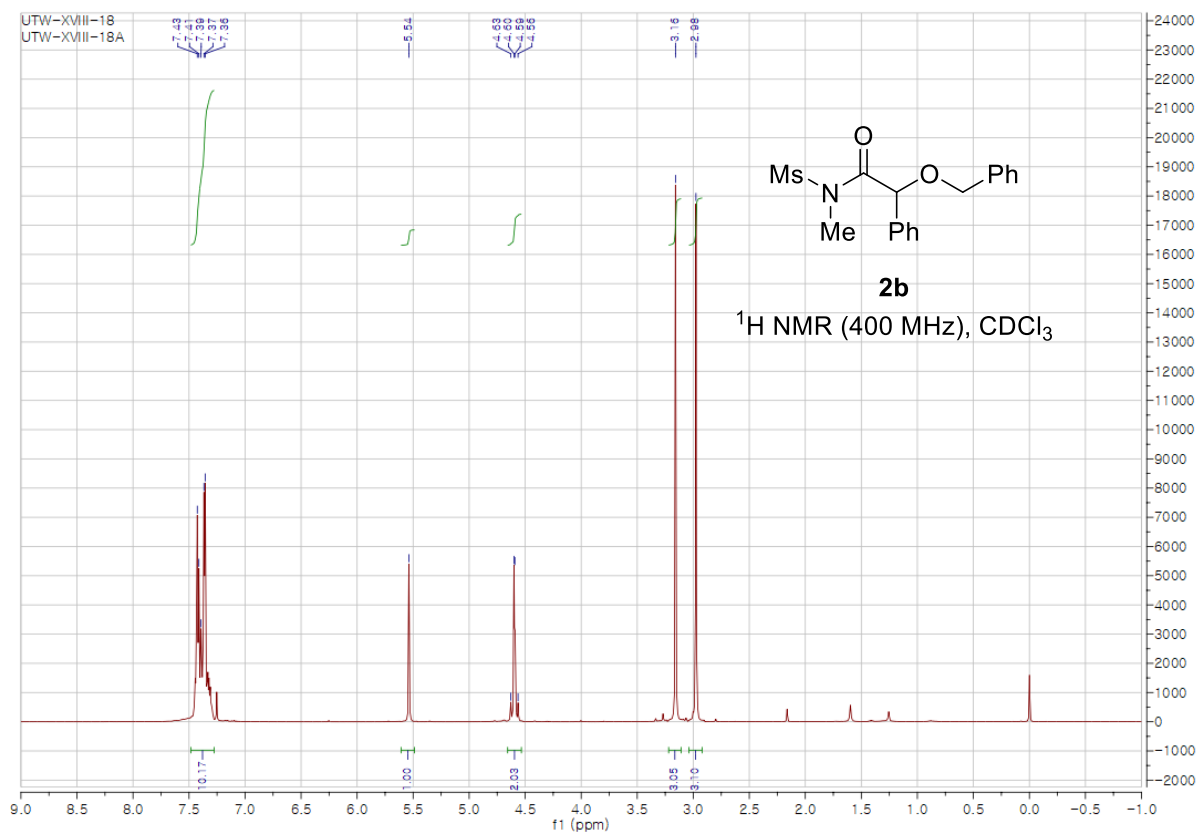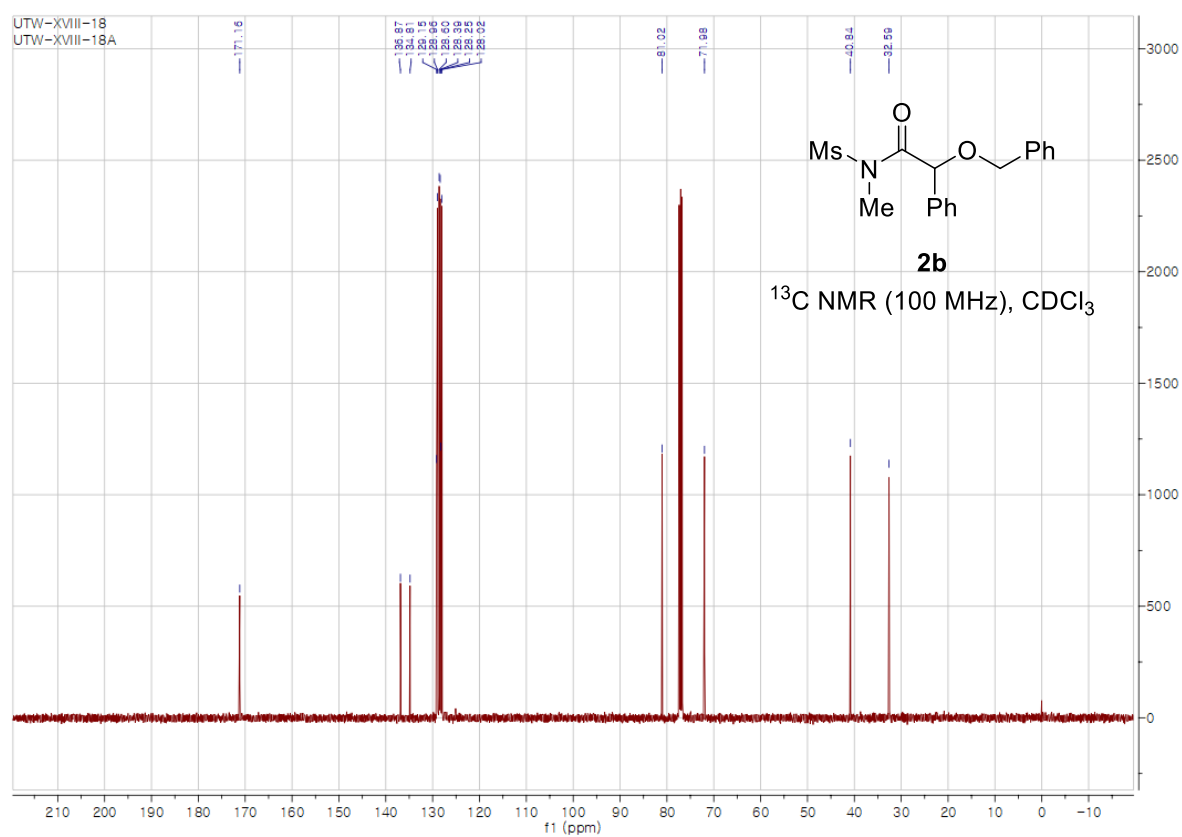

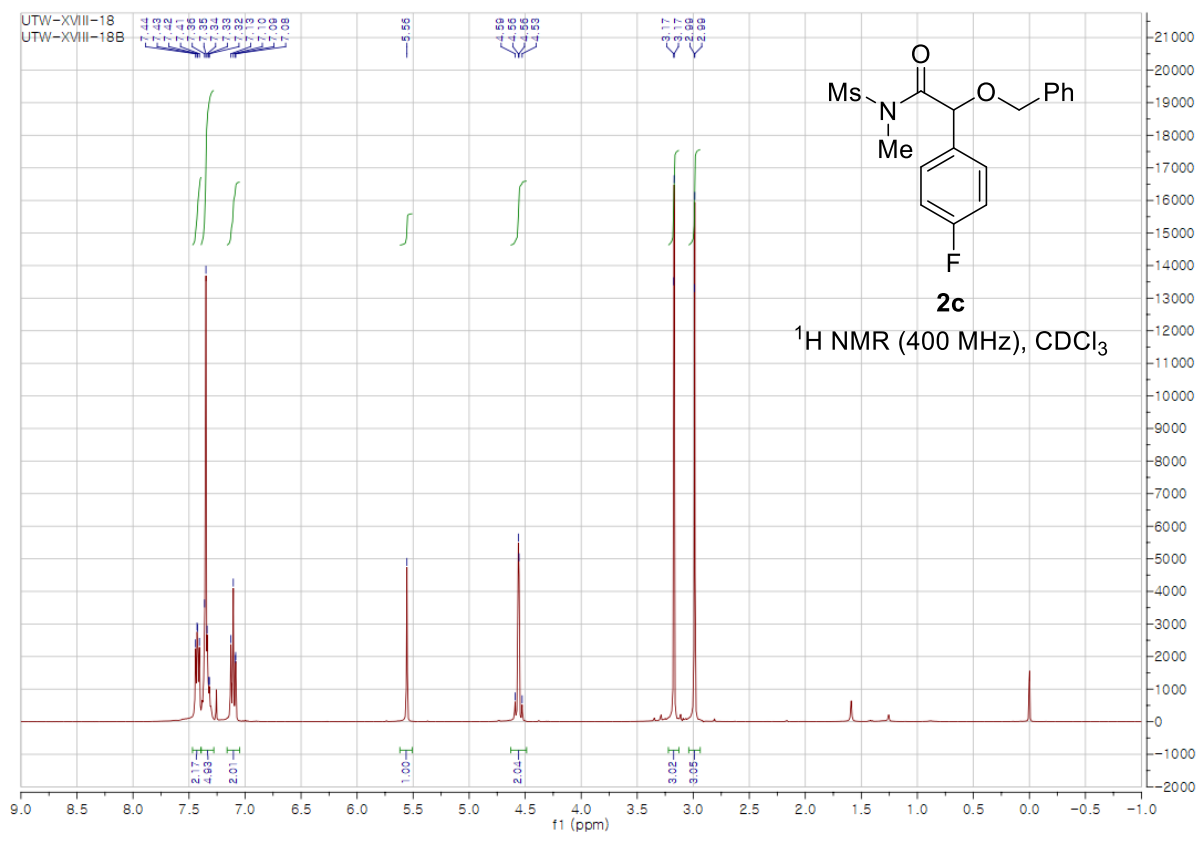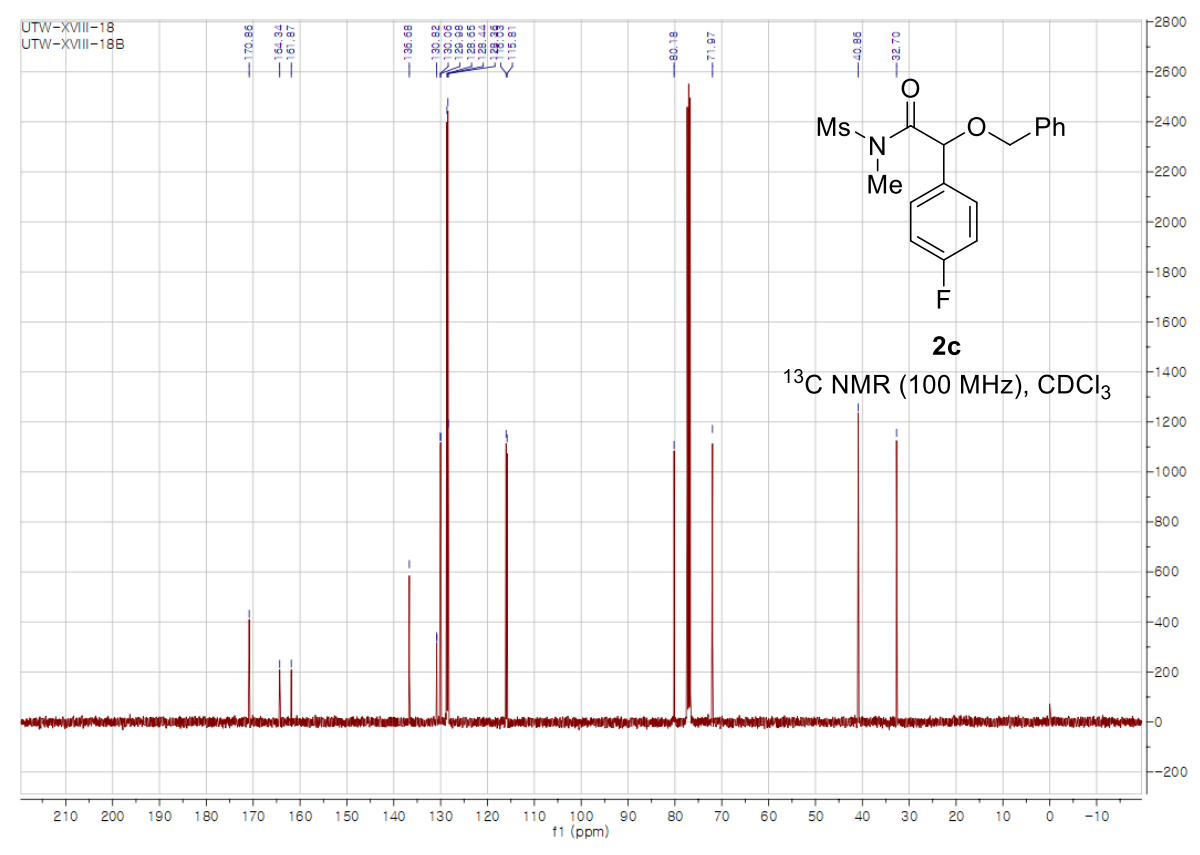



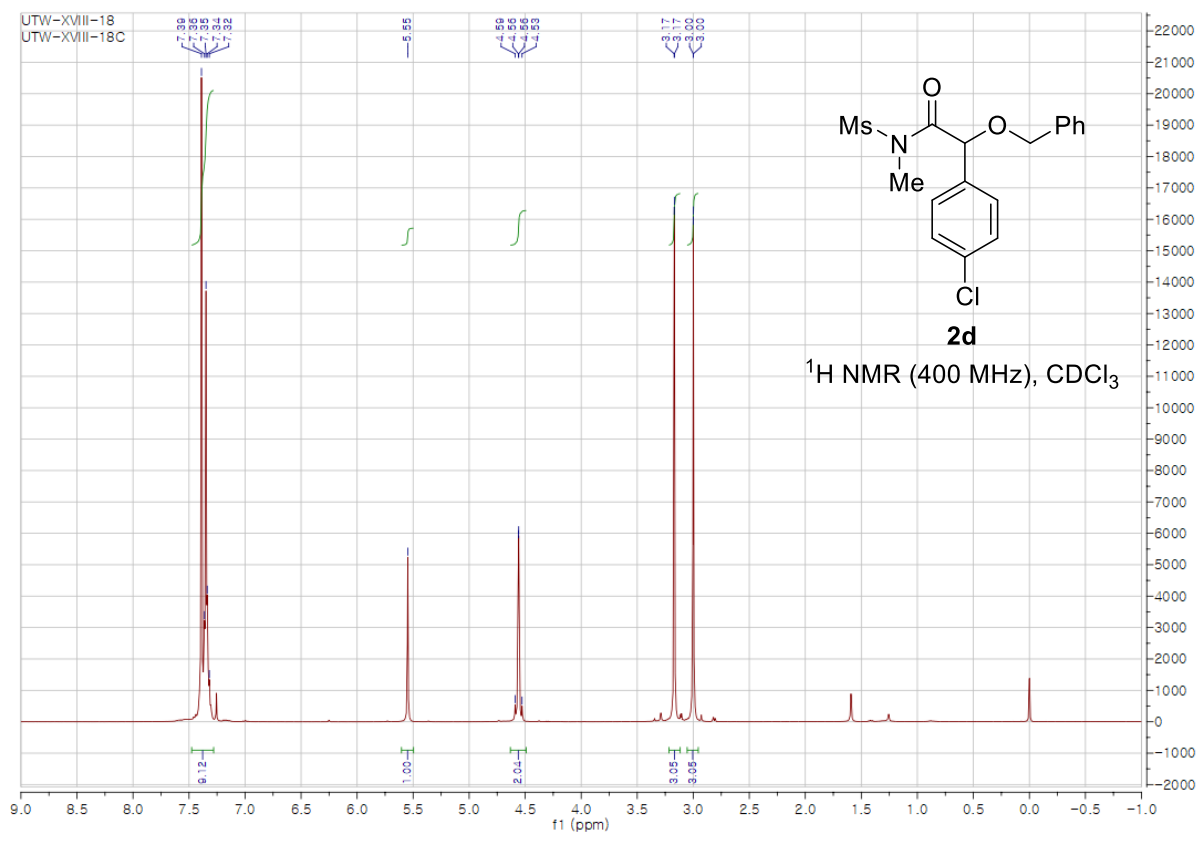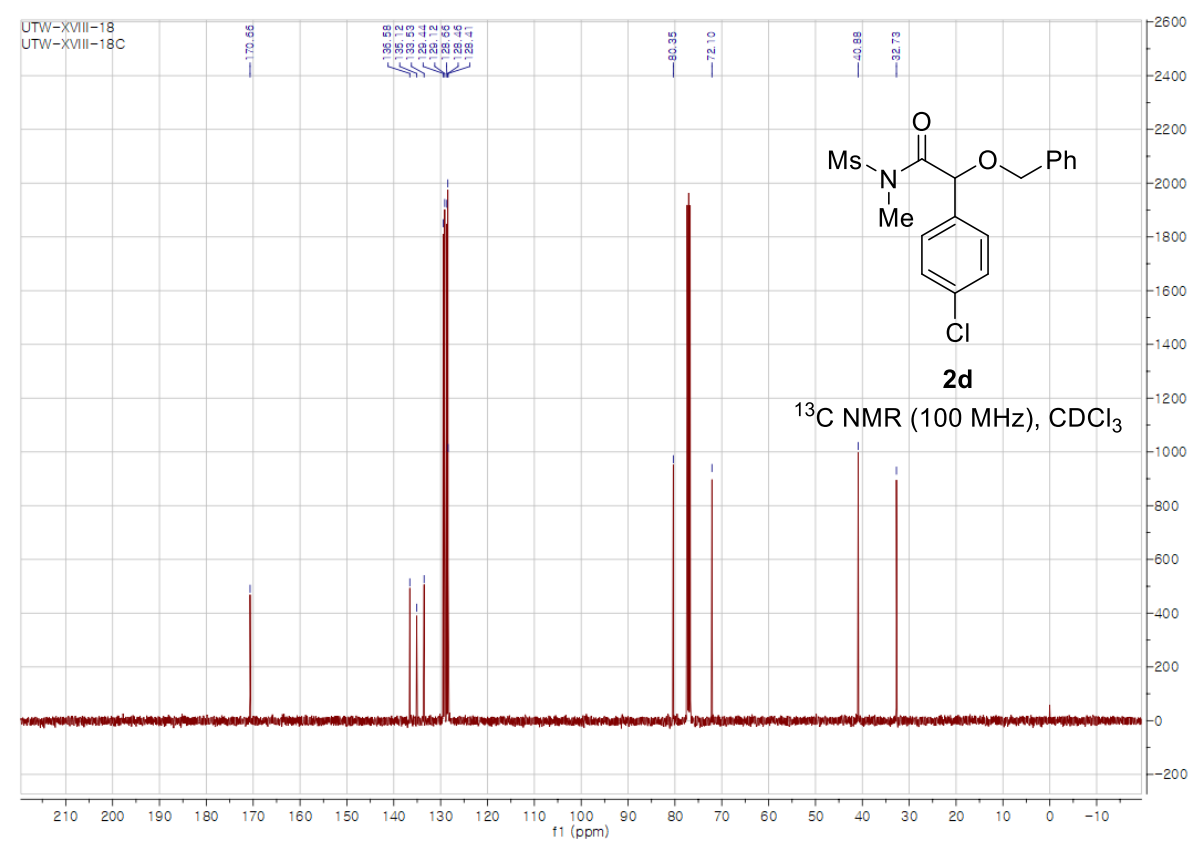

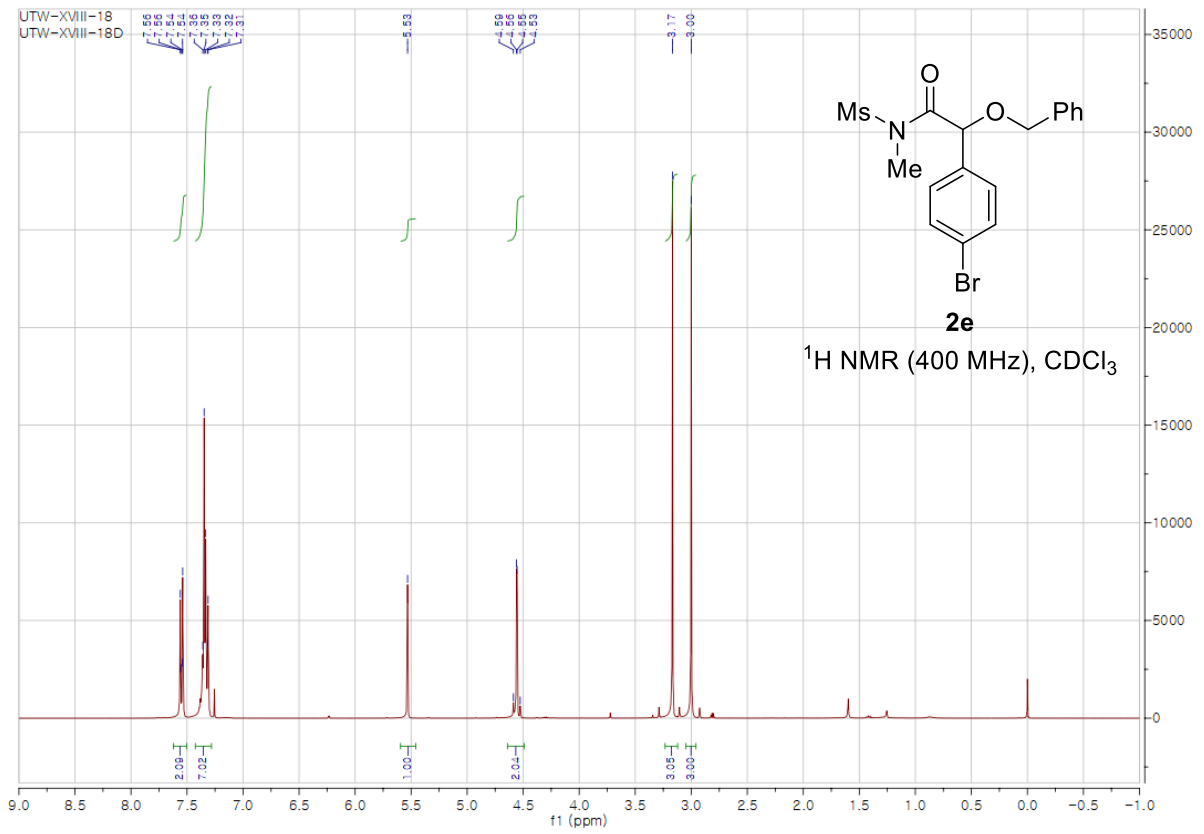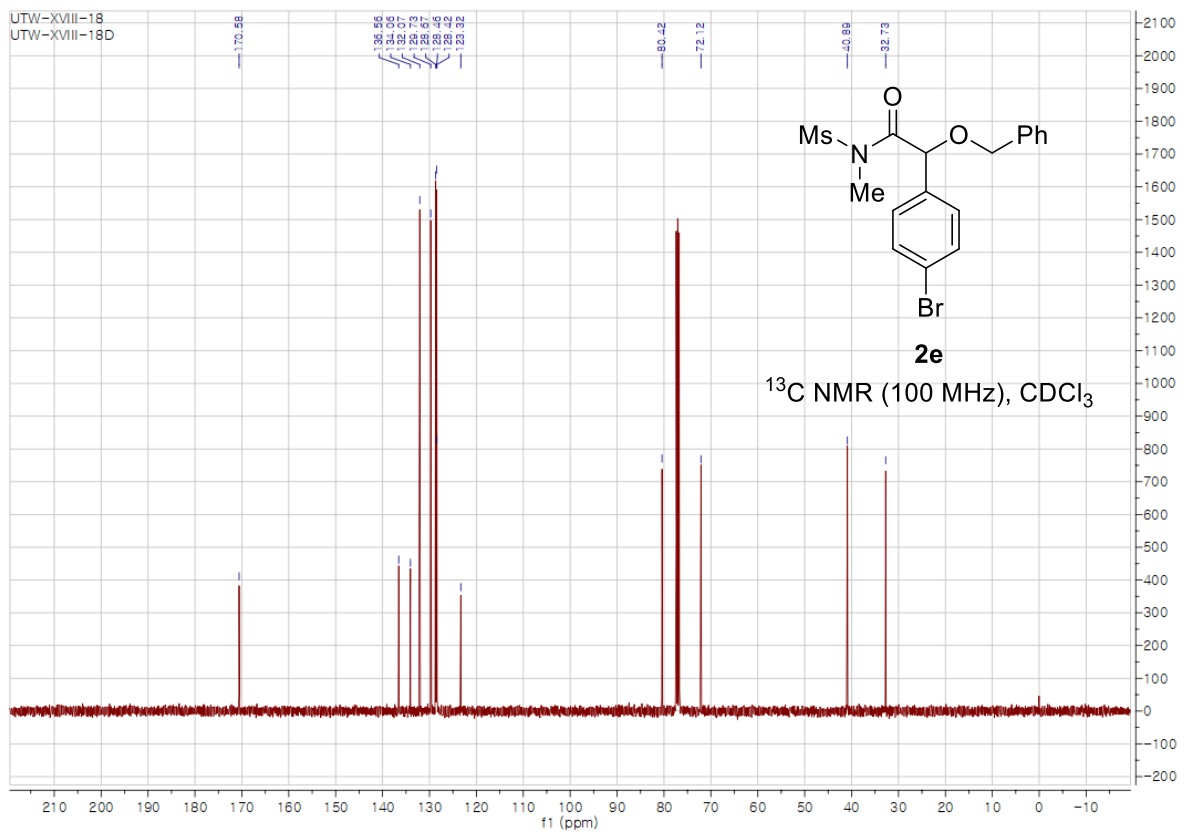

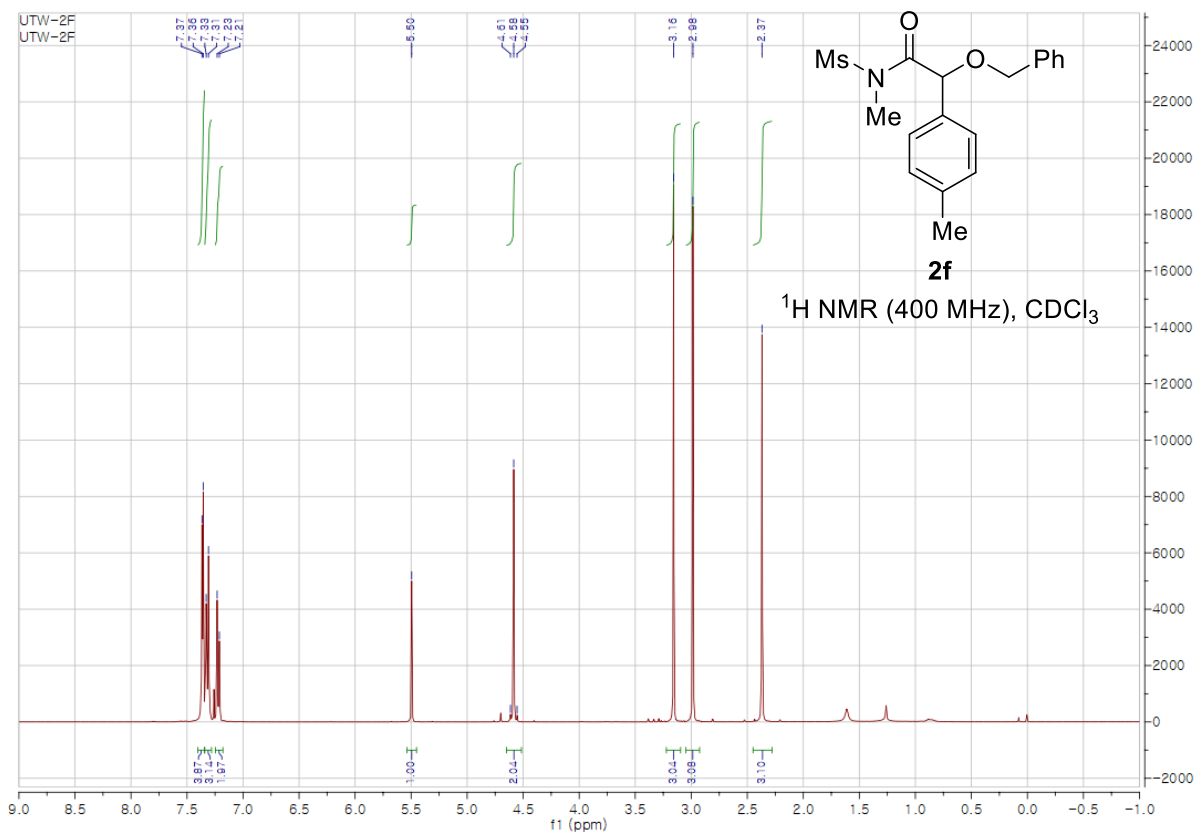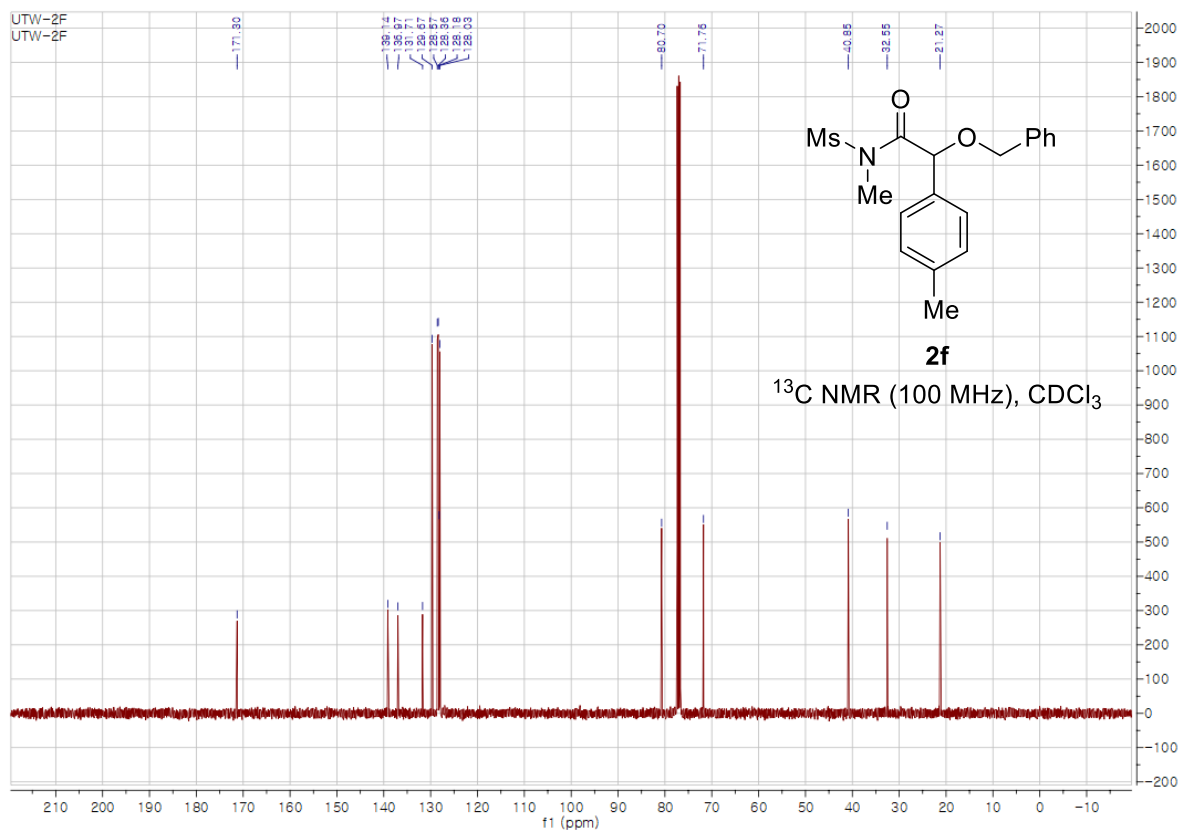

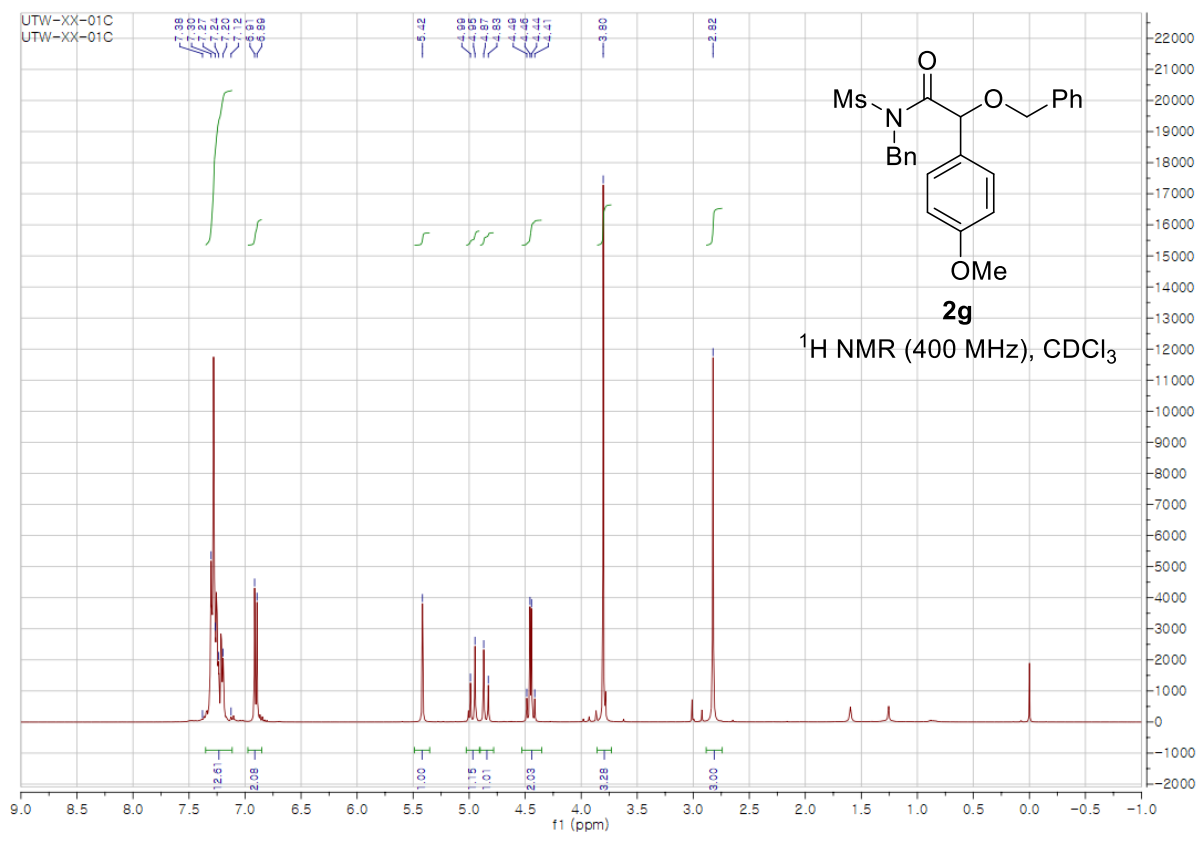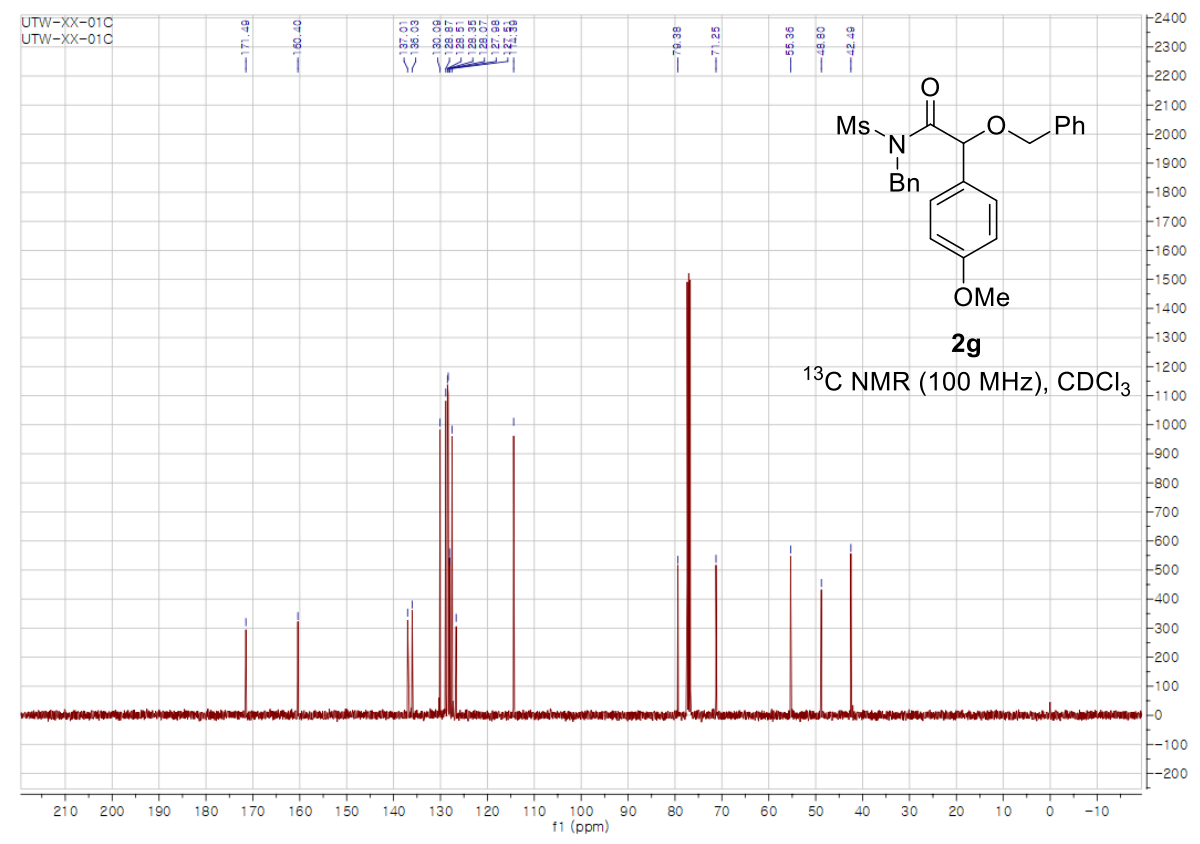



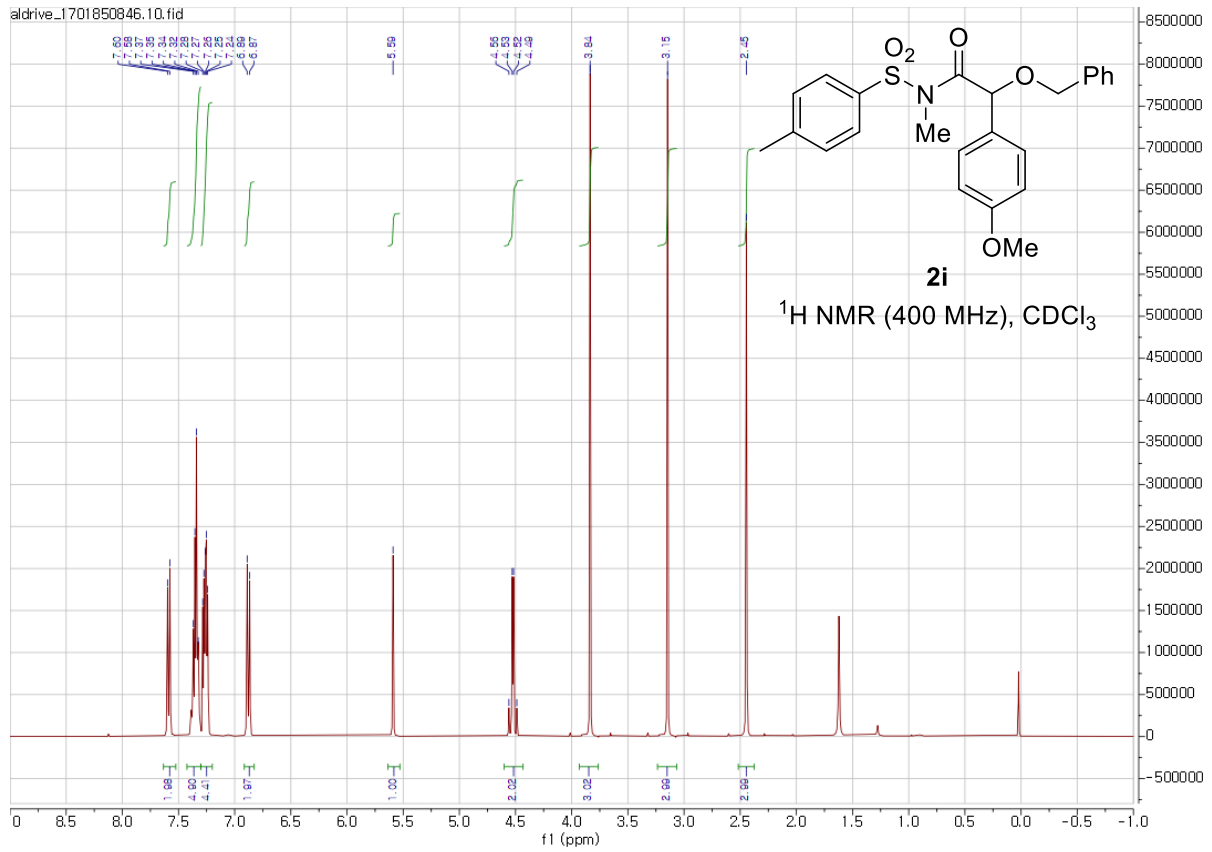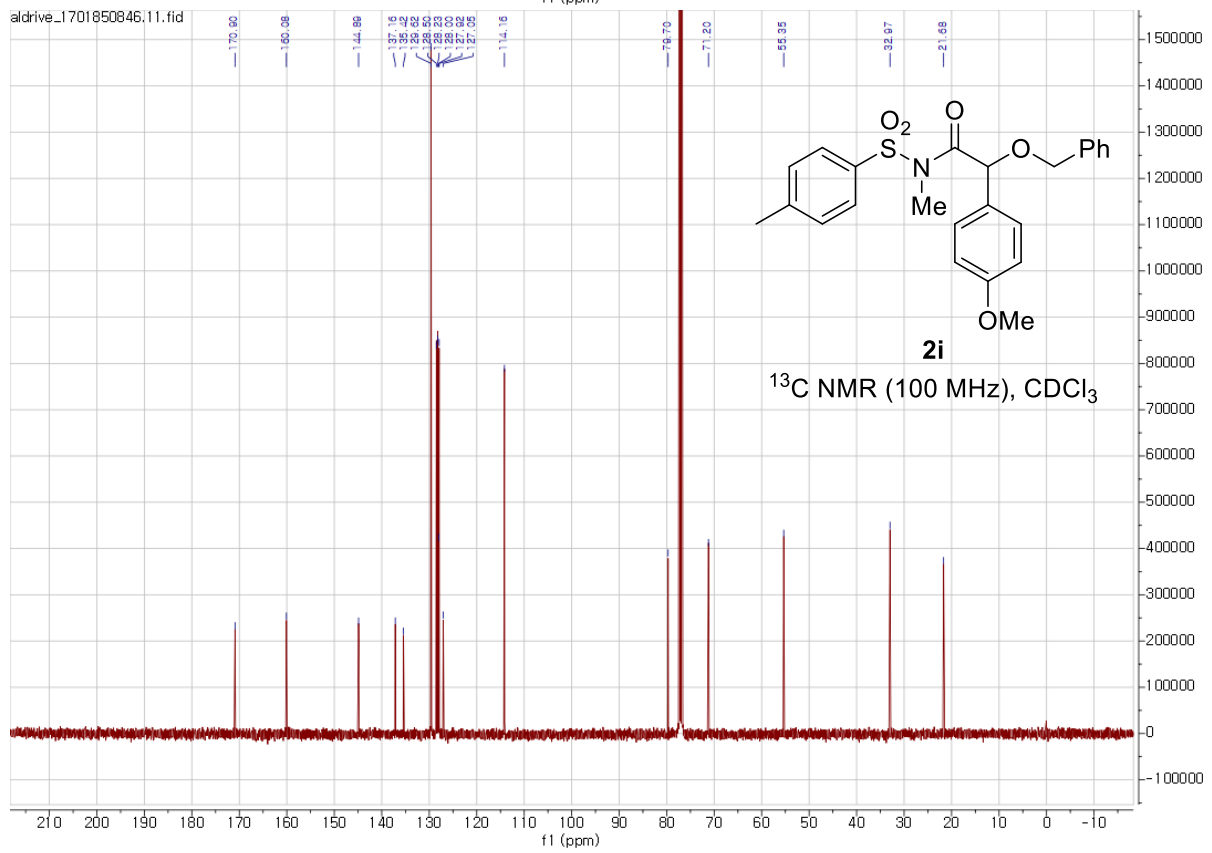

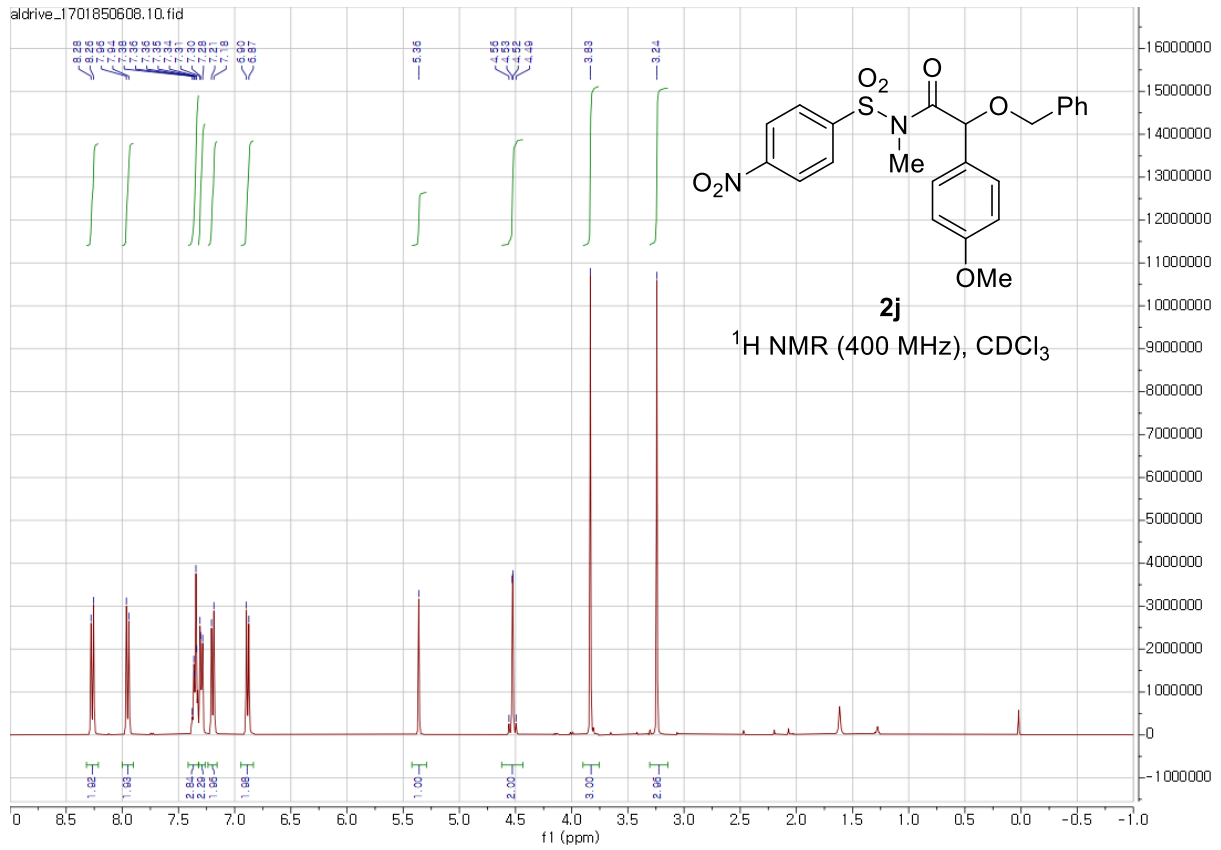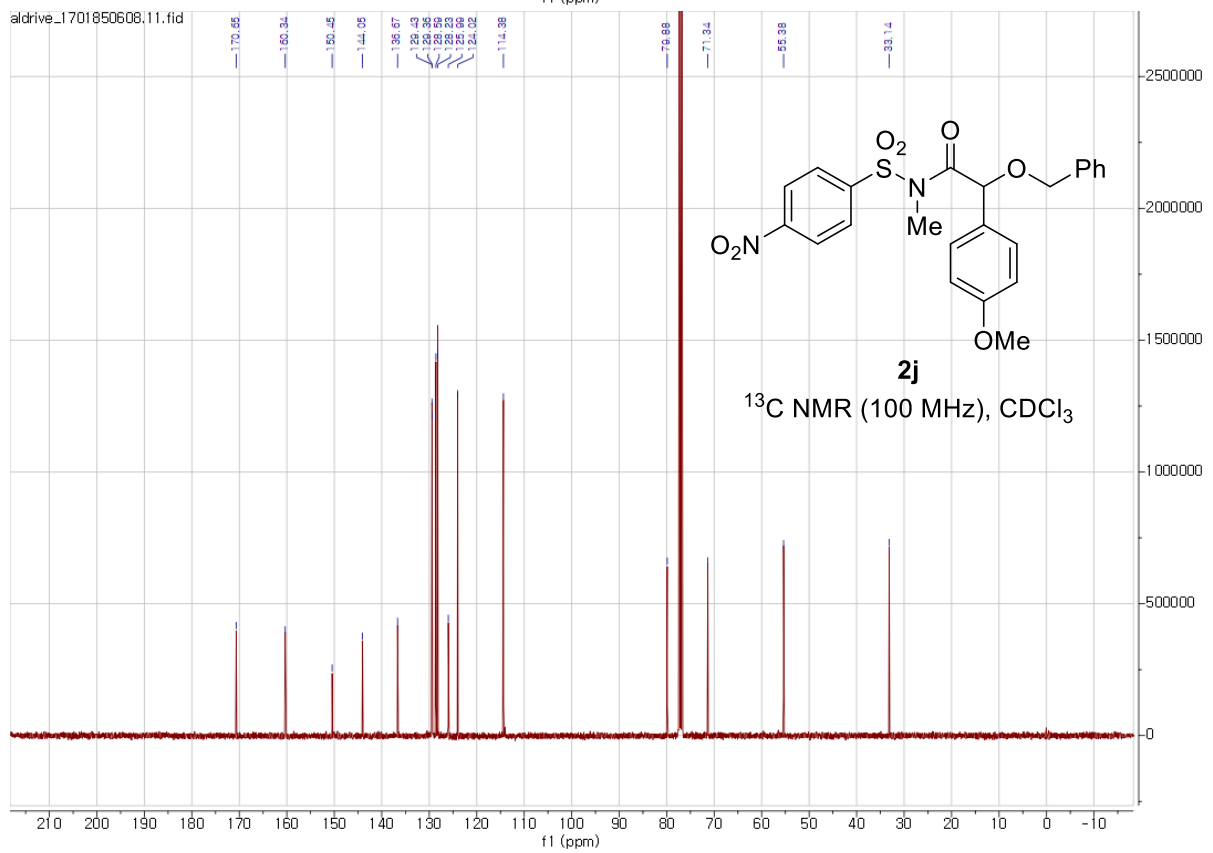





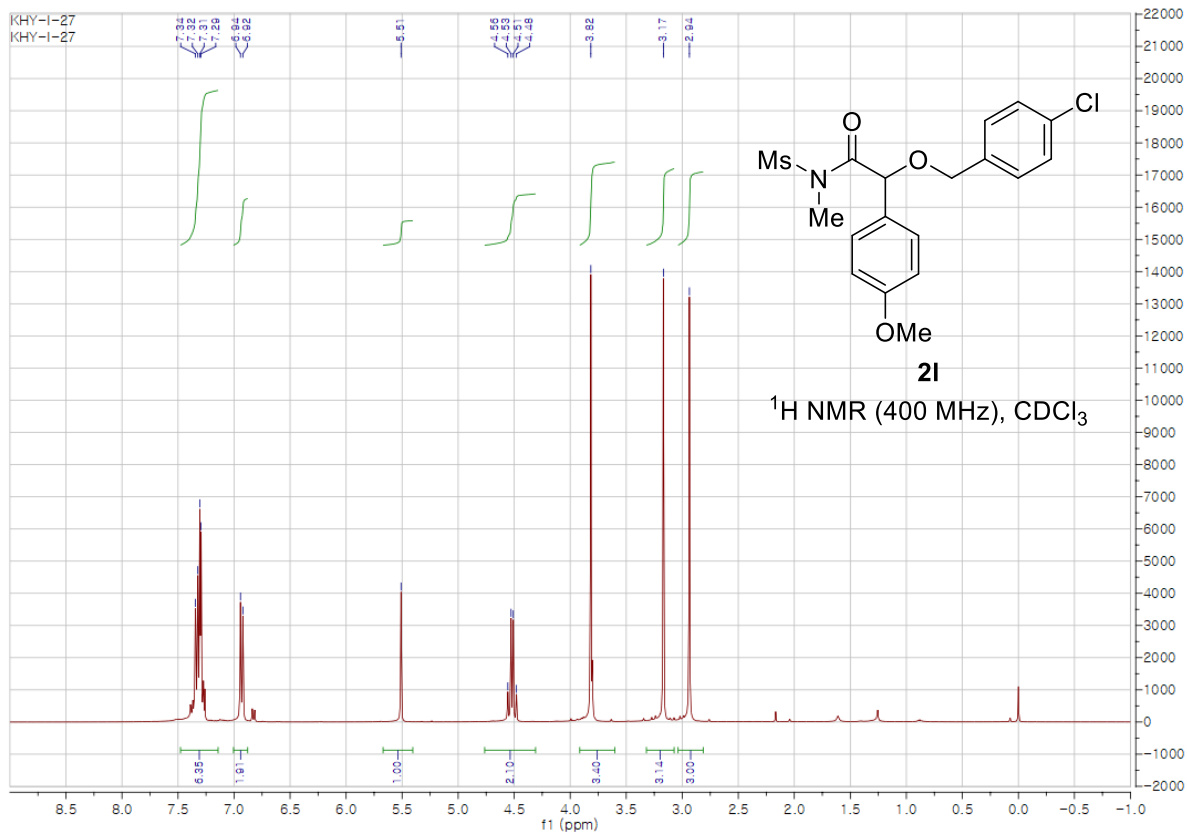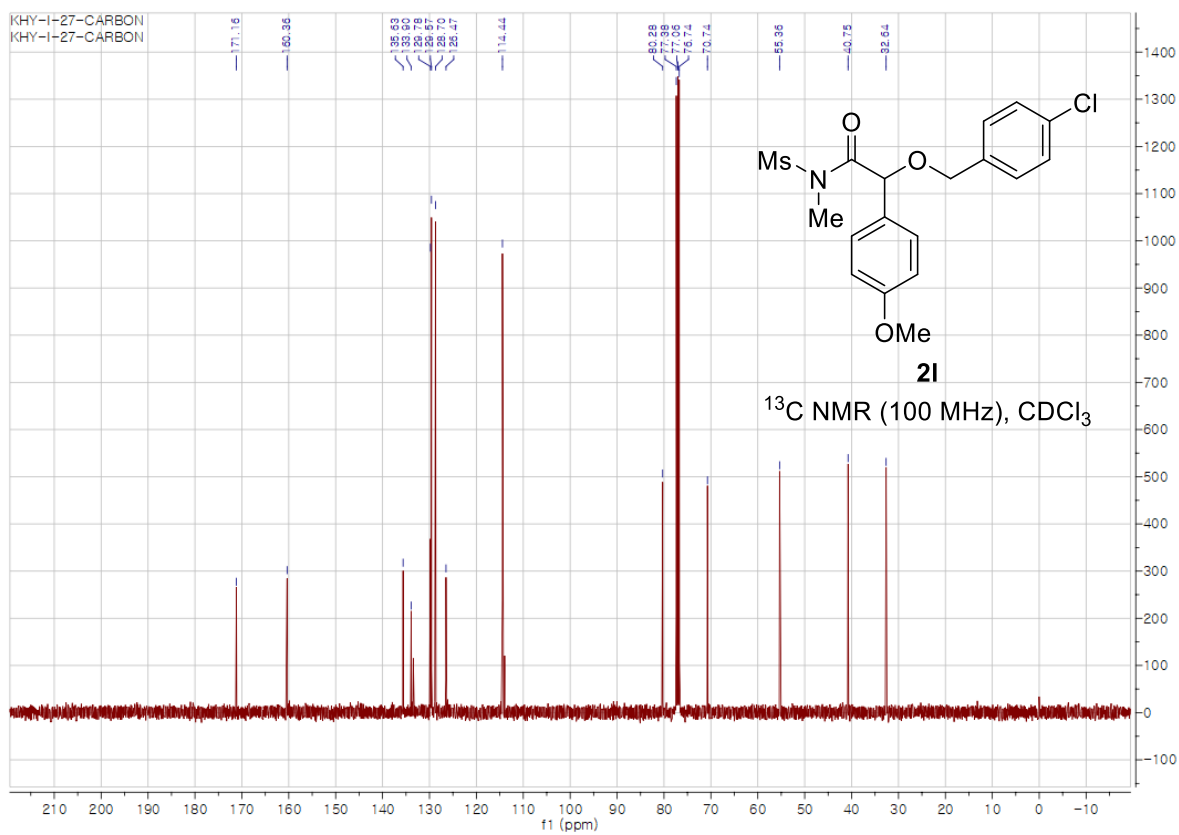

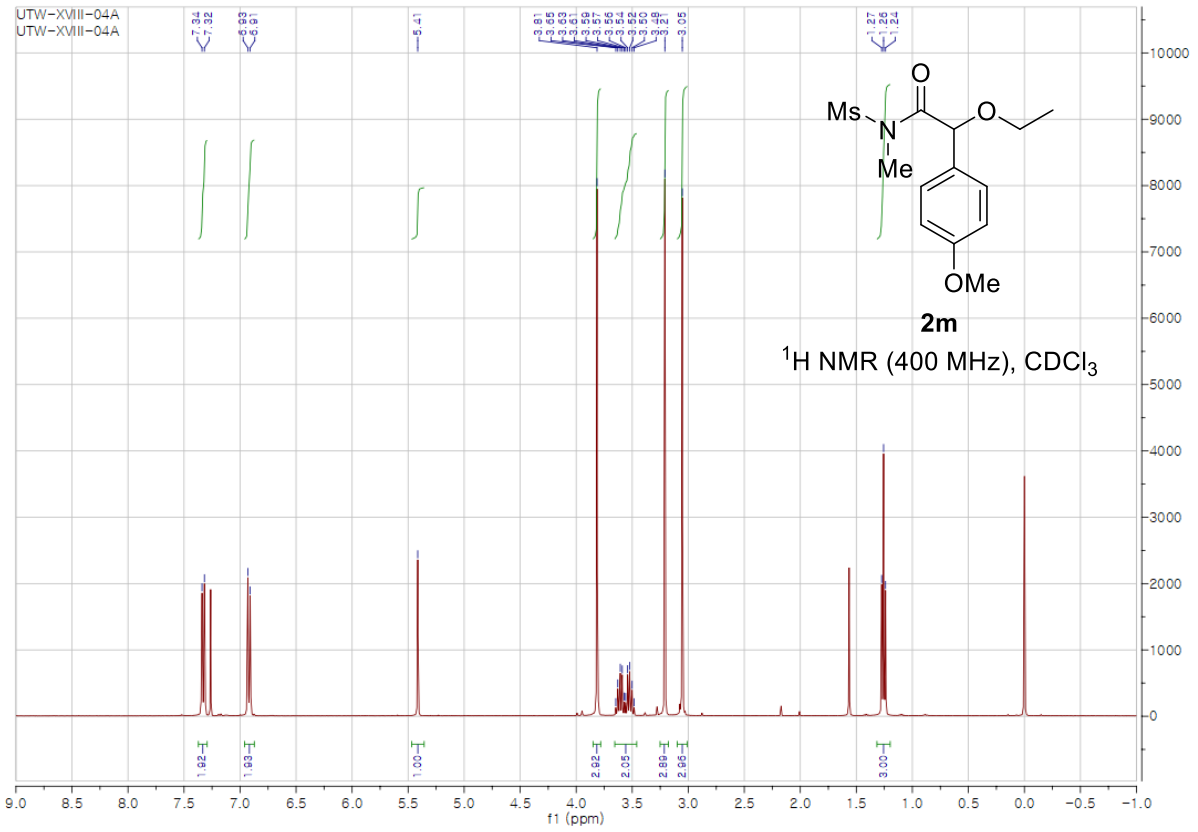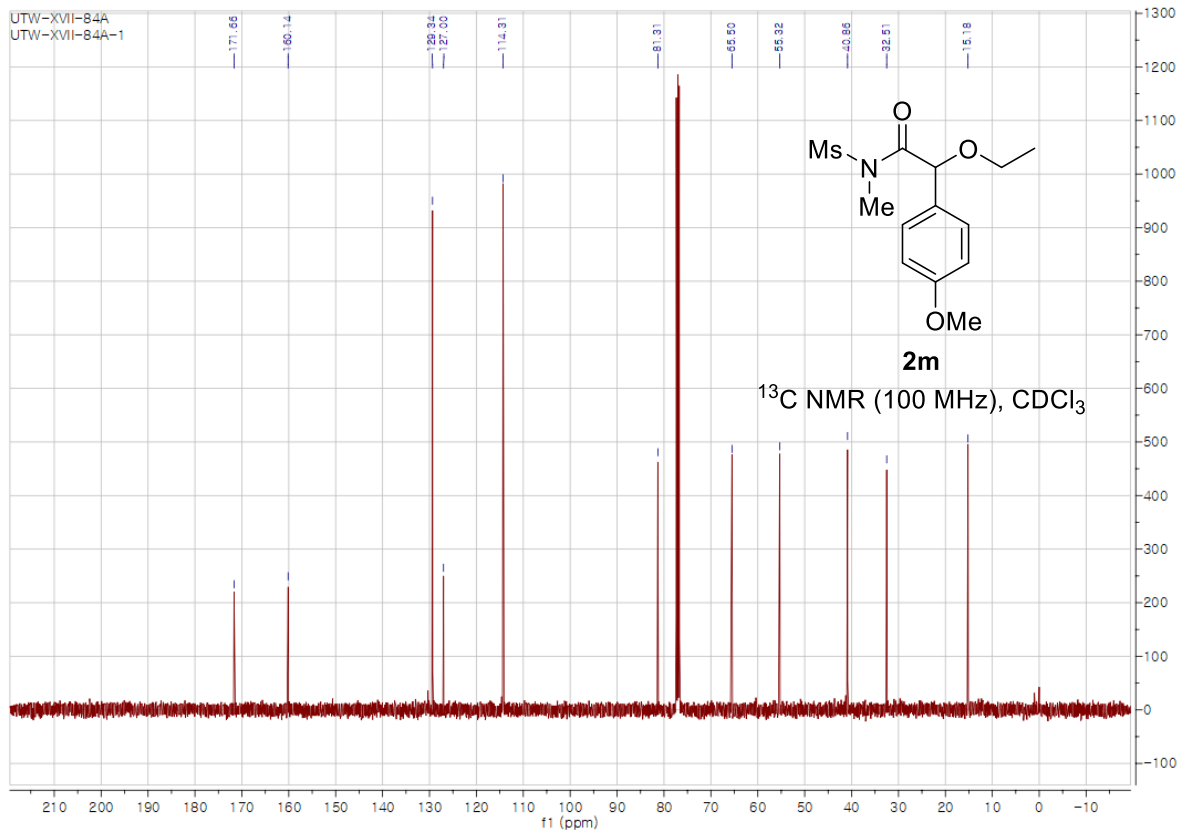

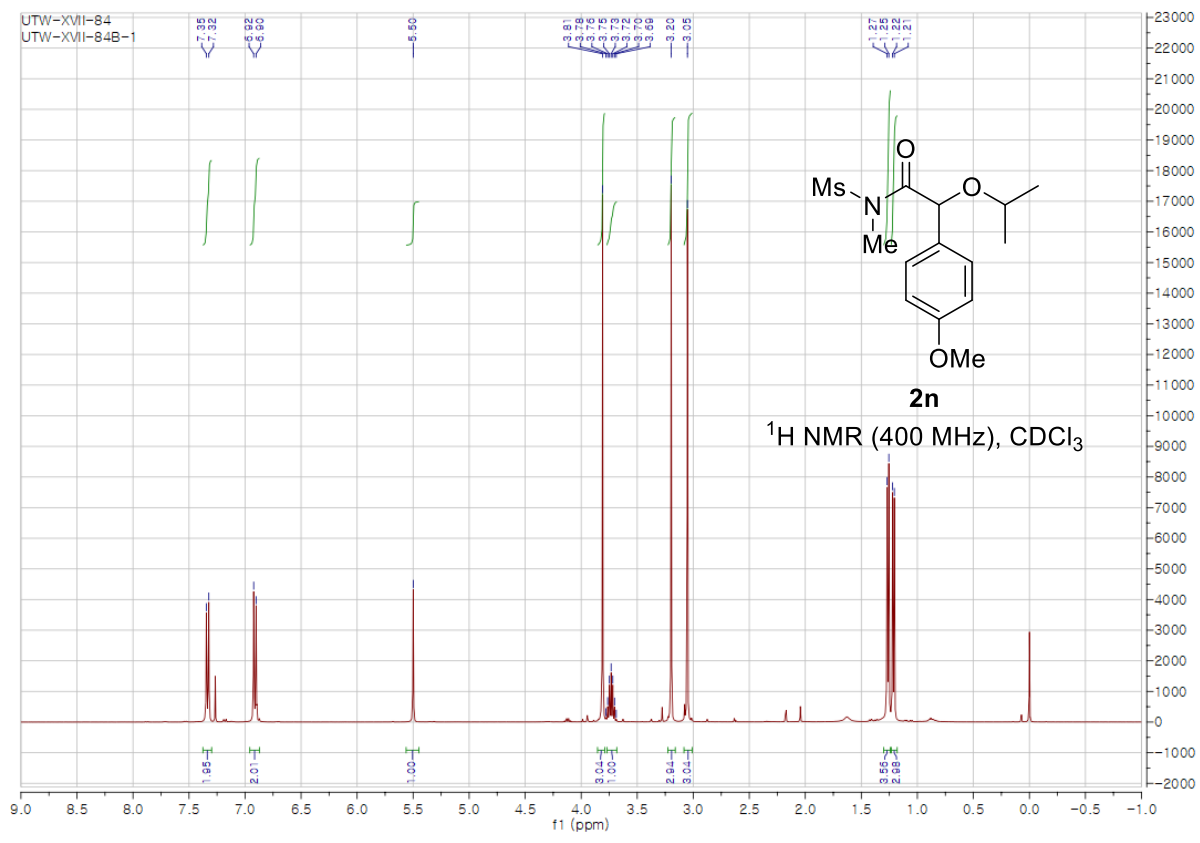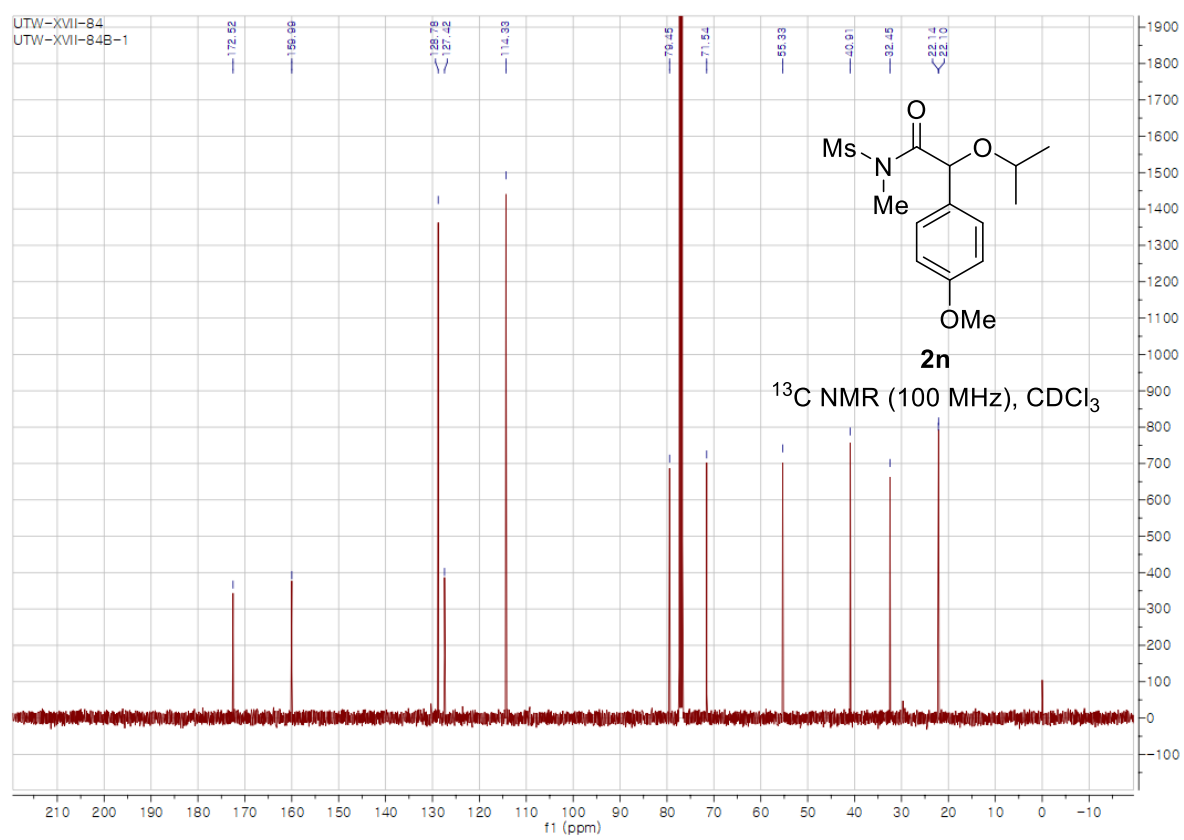

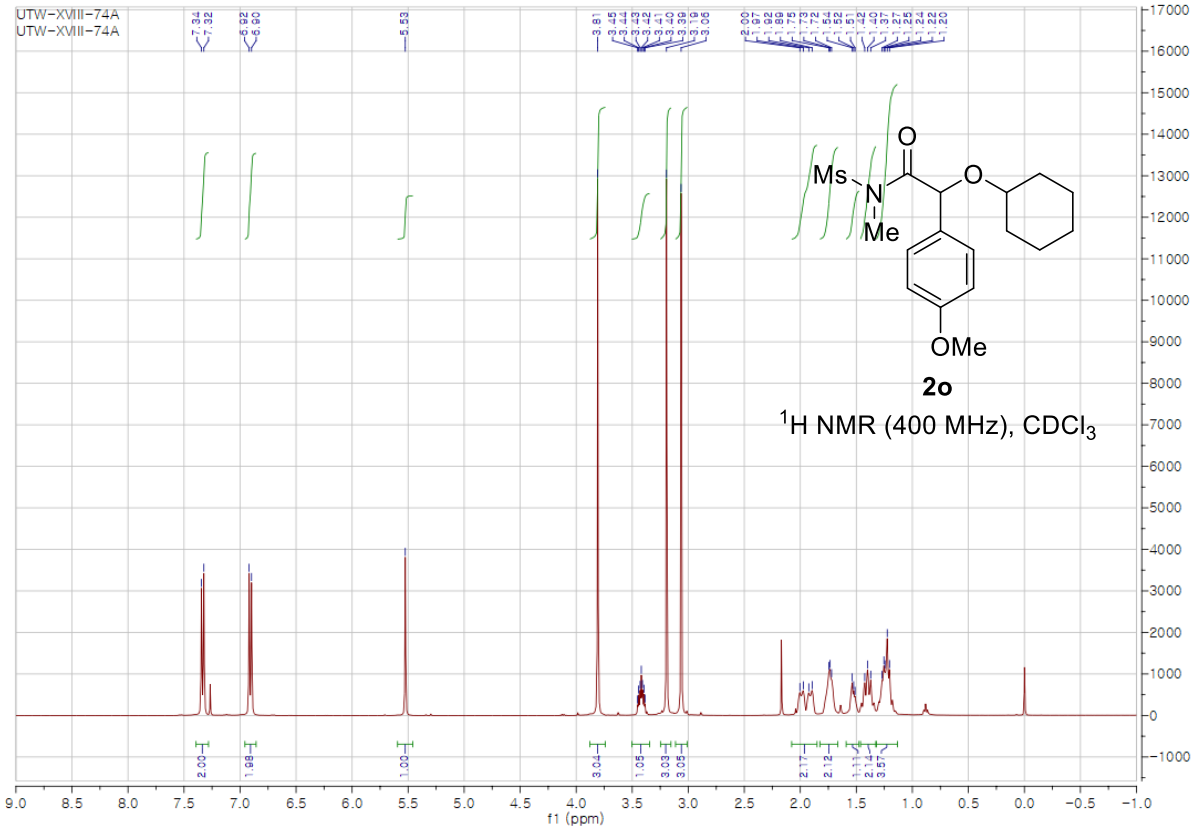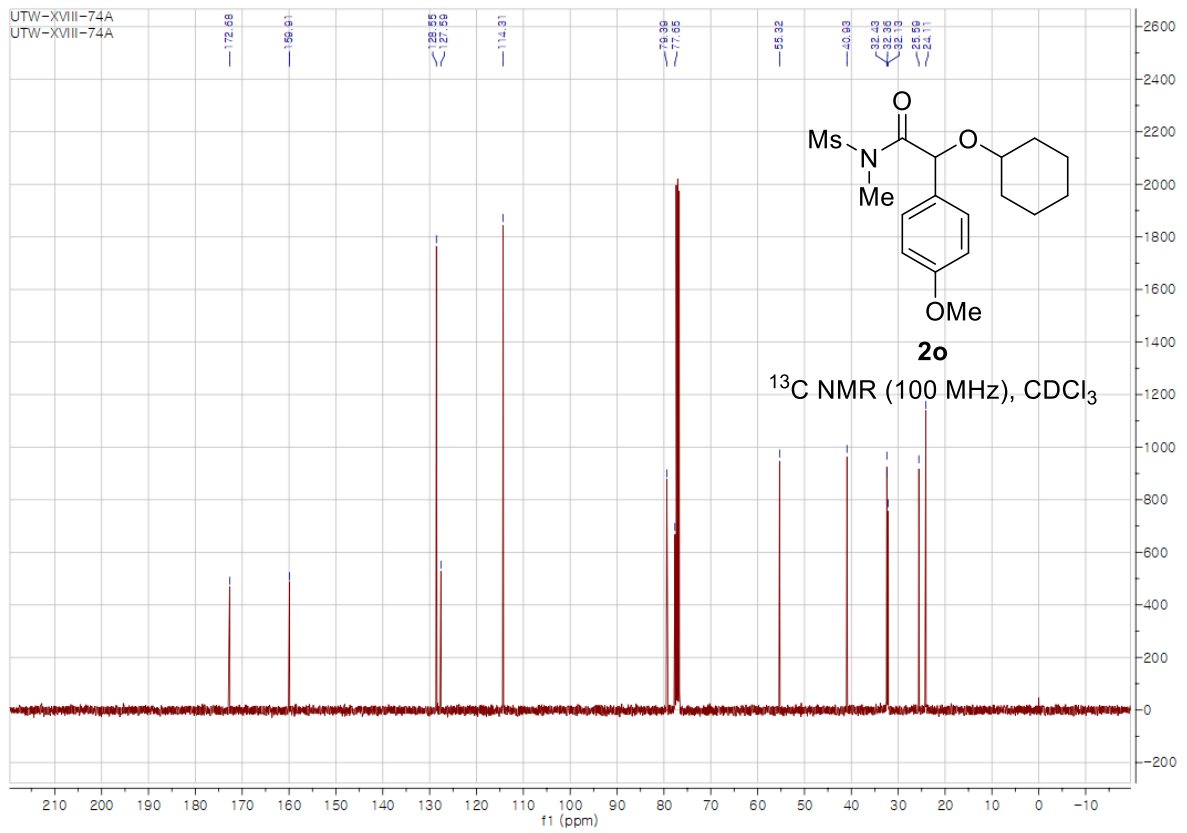

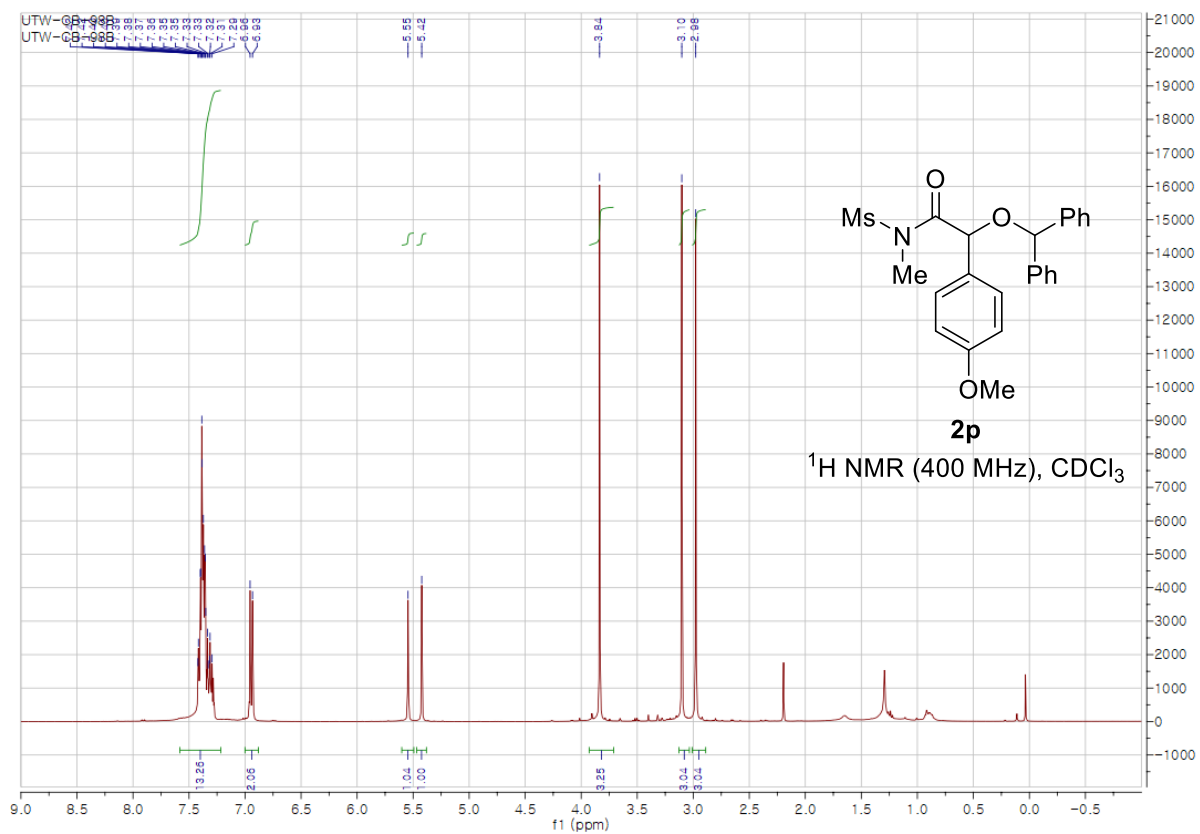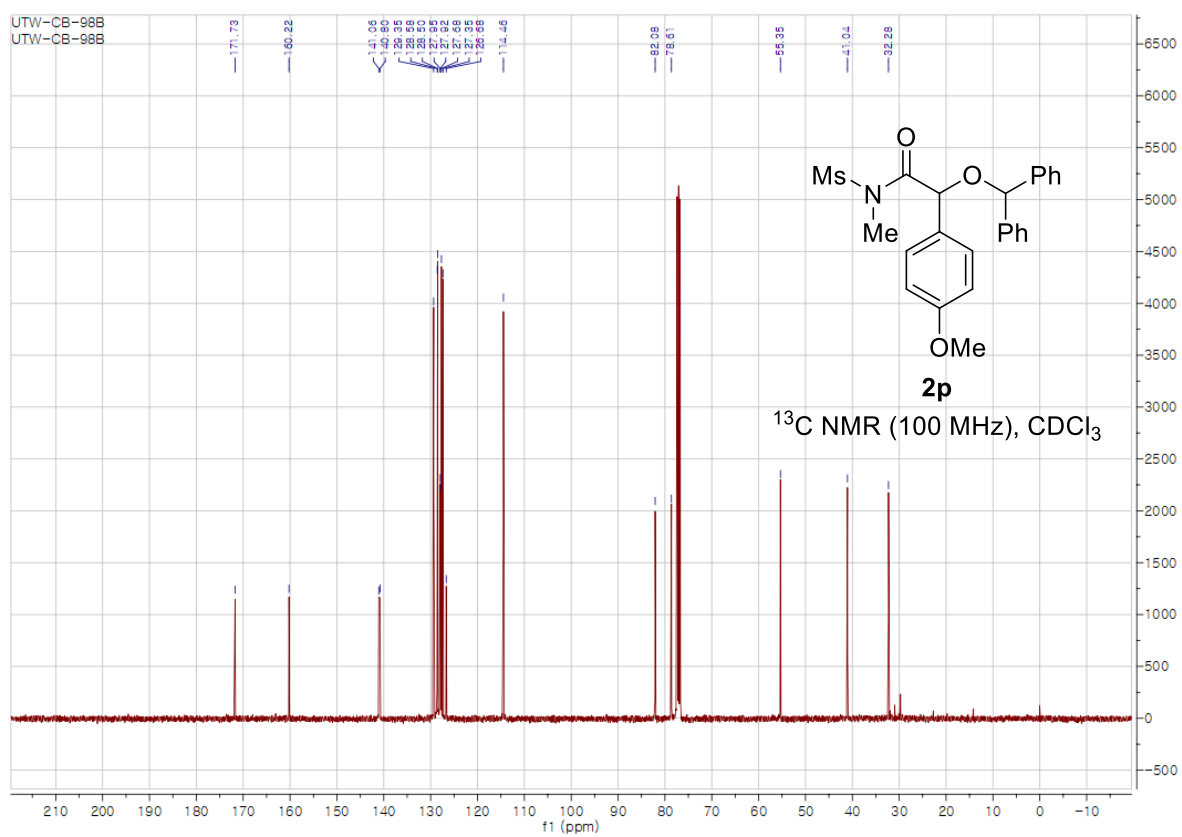

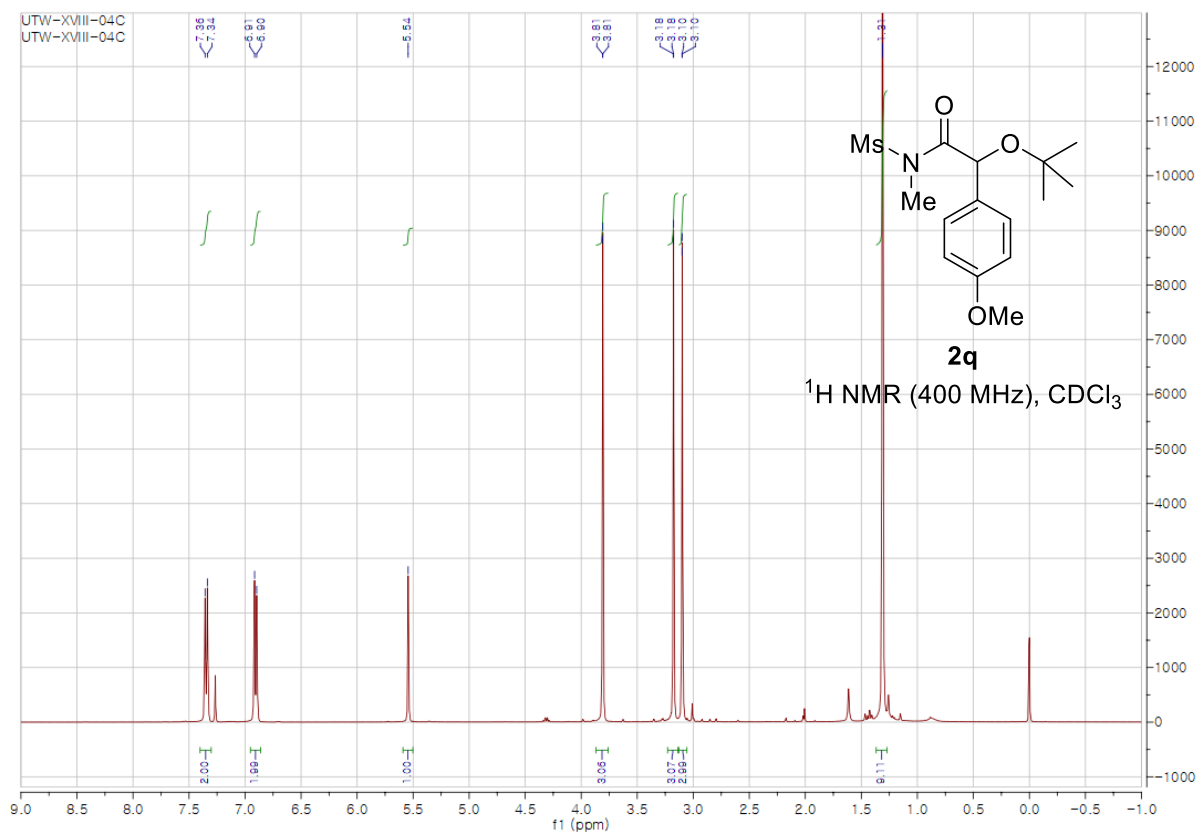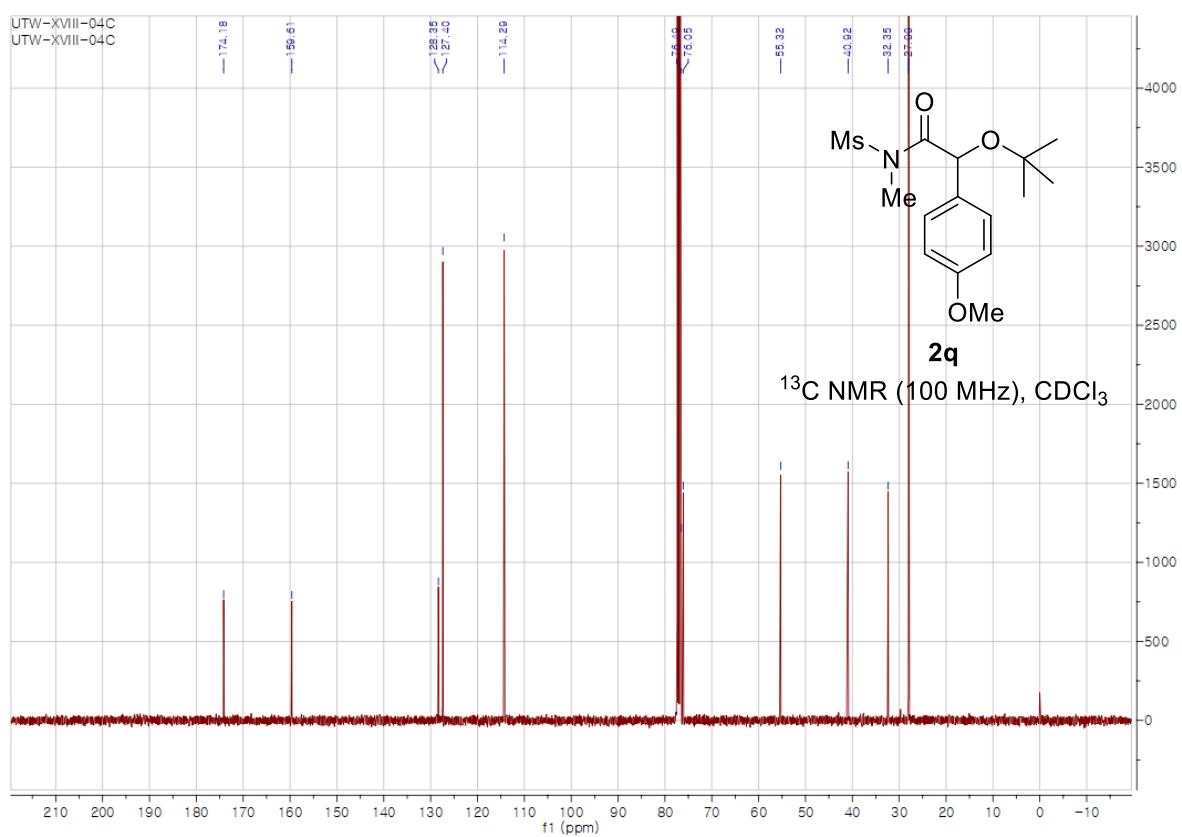

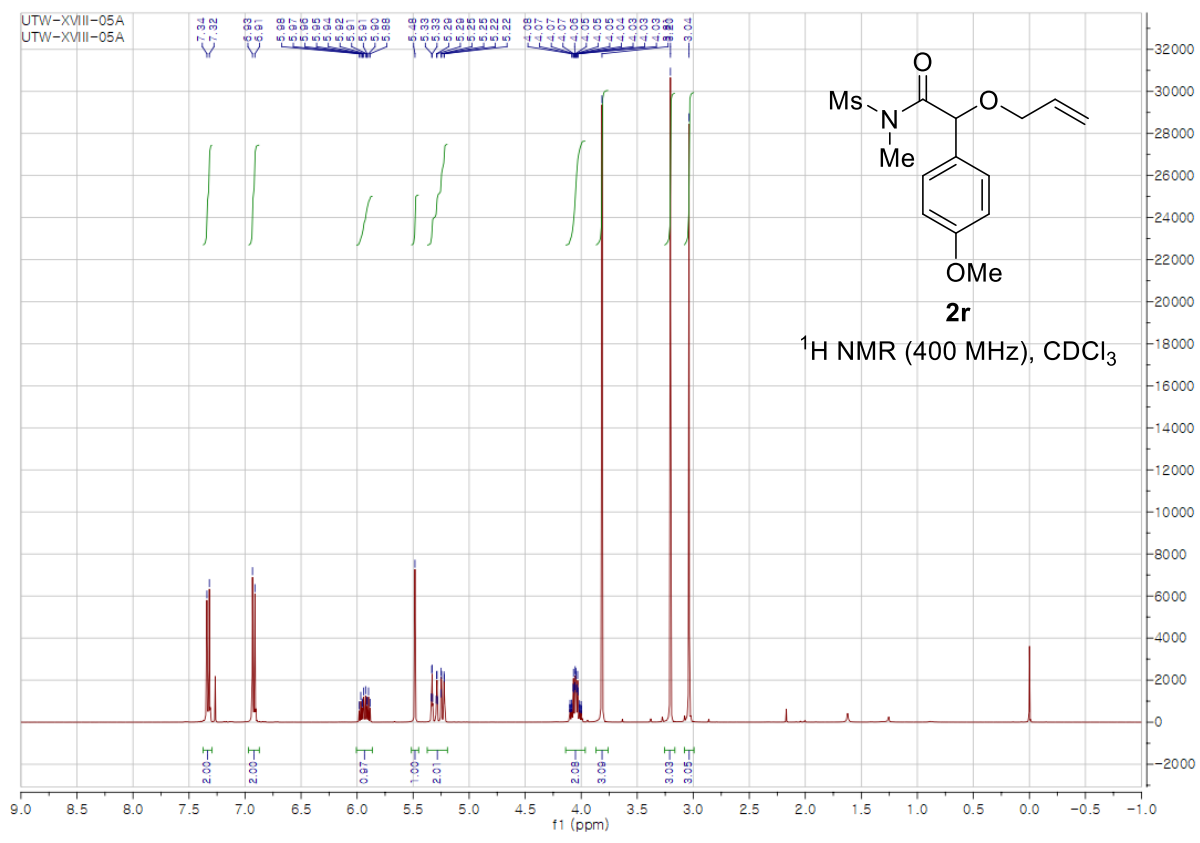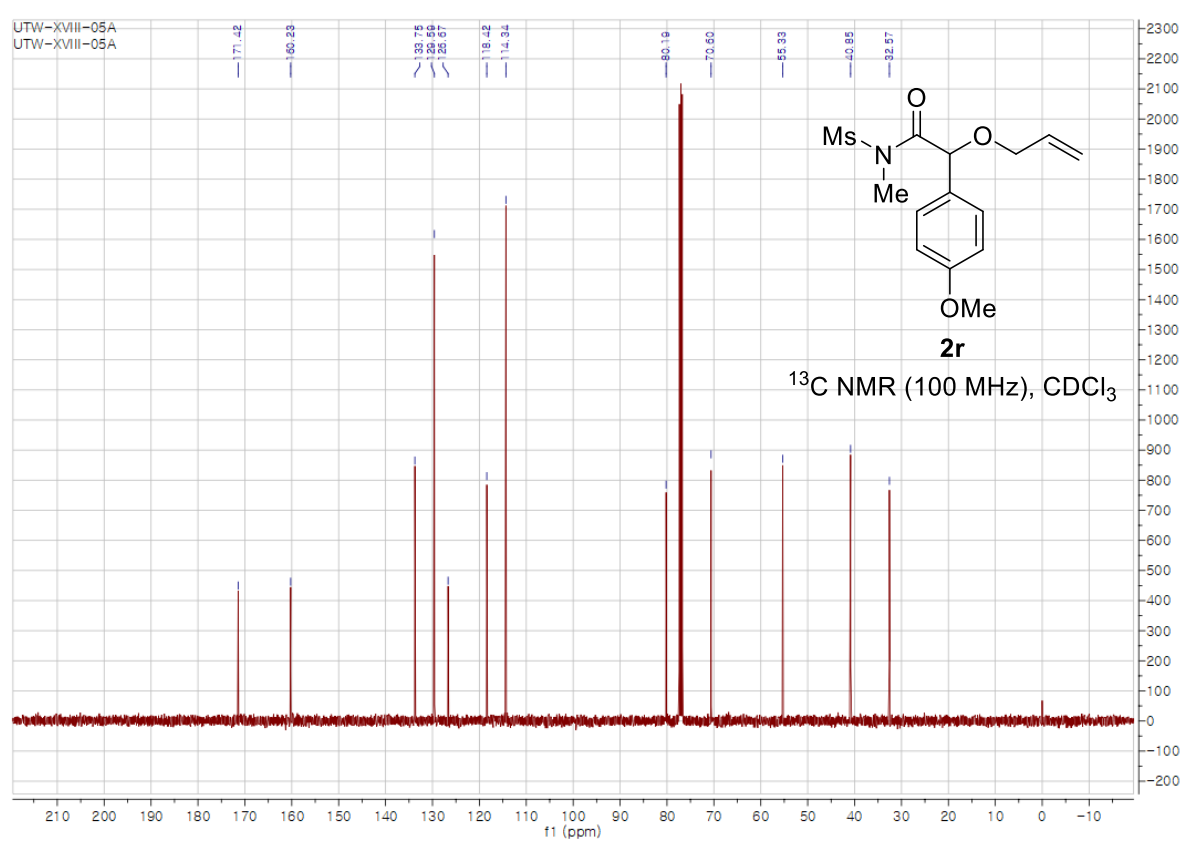

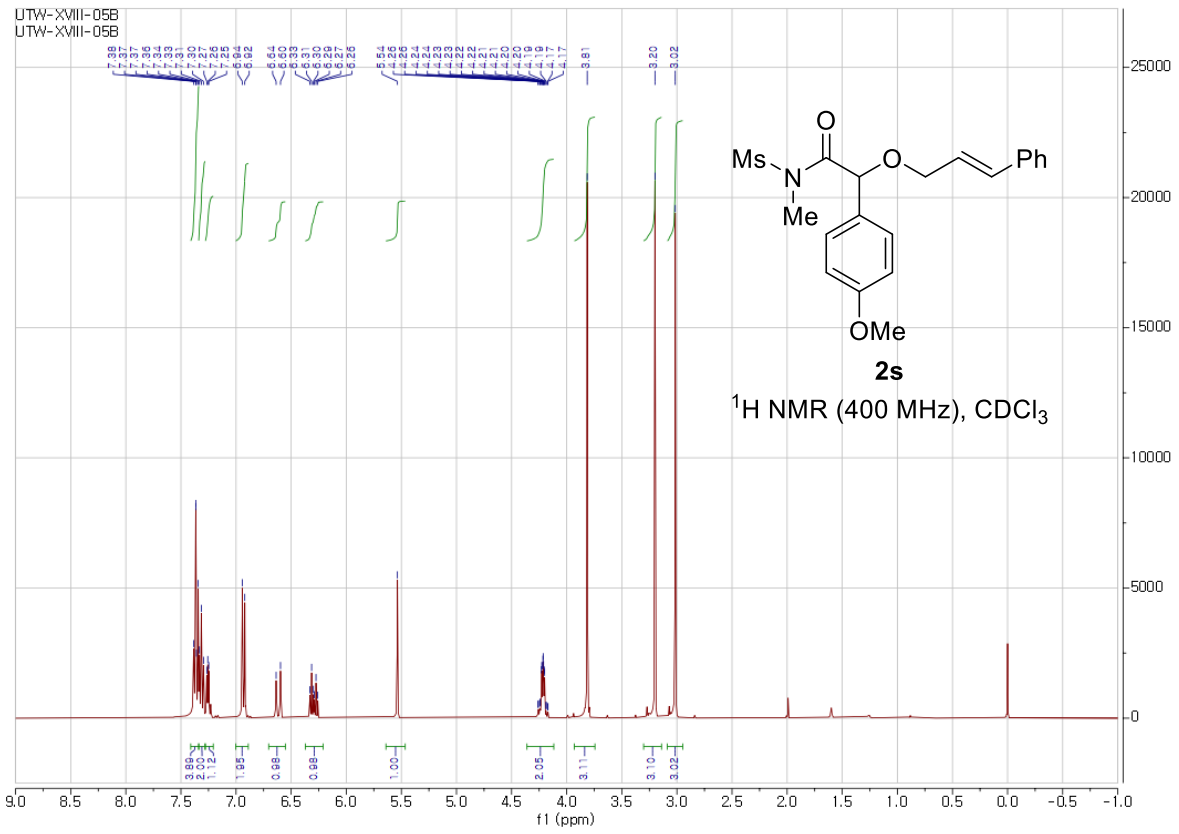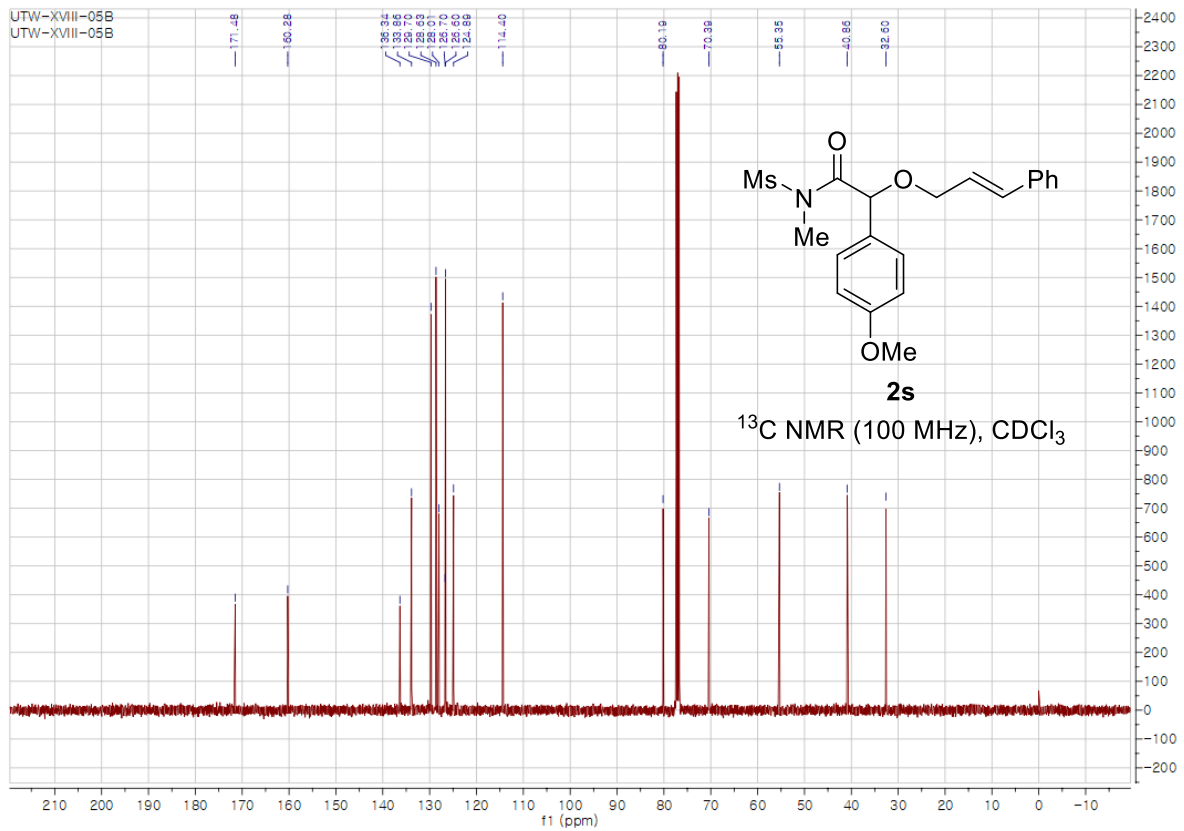



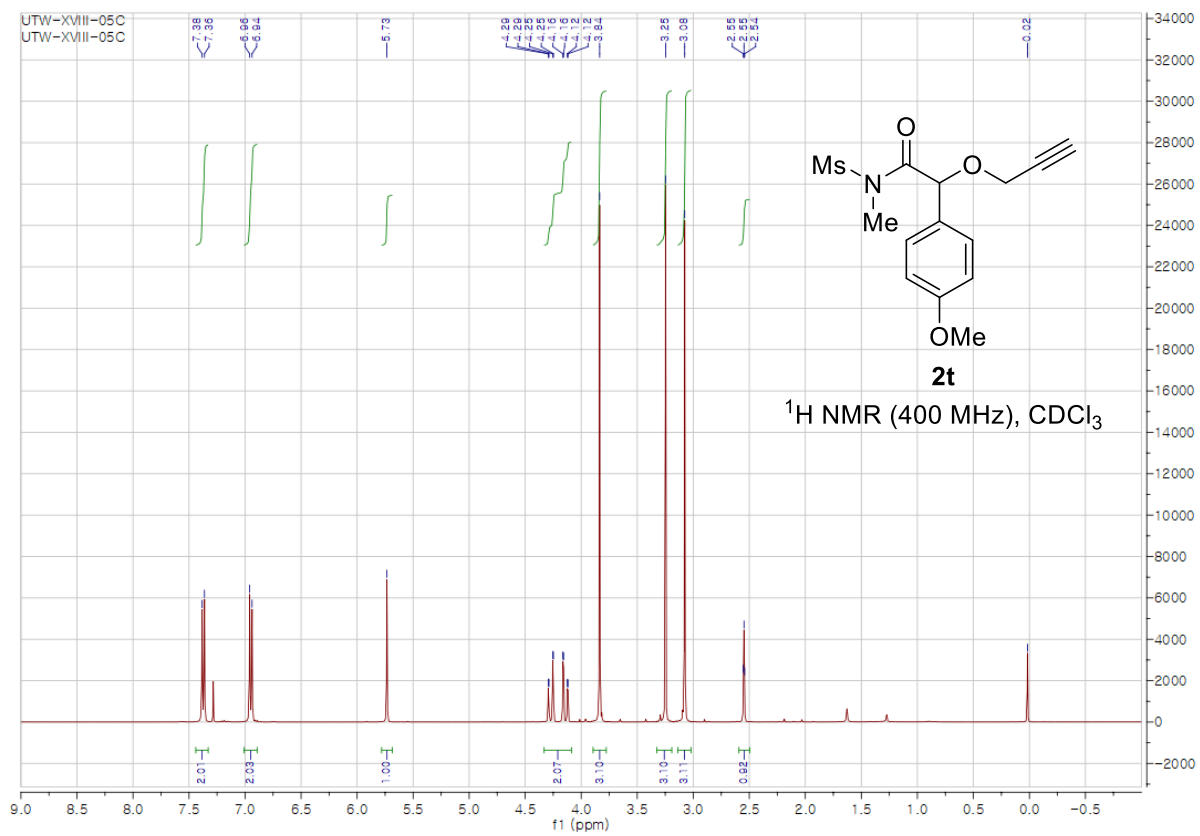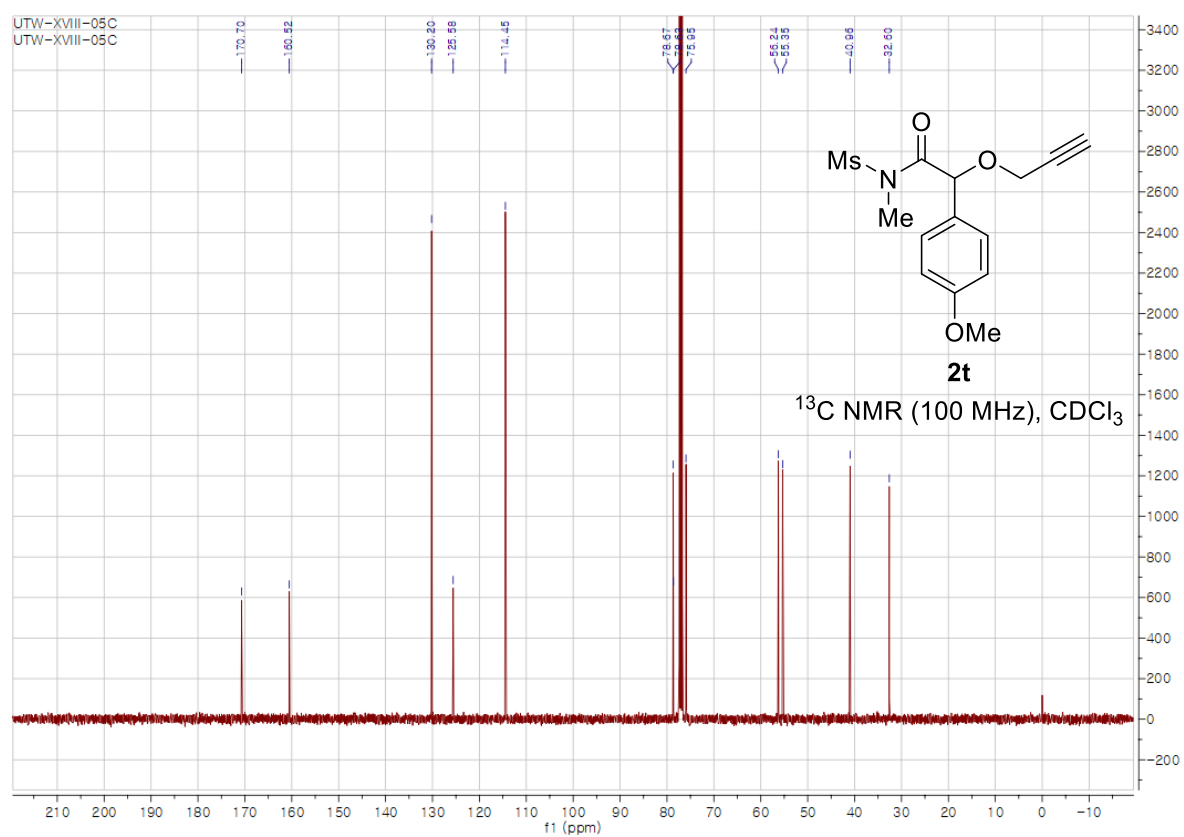

UTW-XVIII-74B  
UTW-XVIII-74B

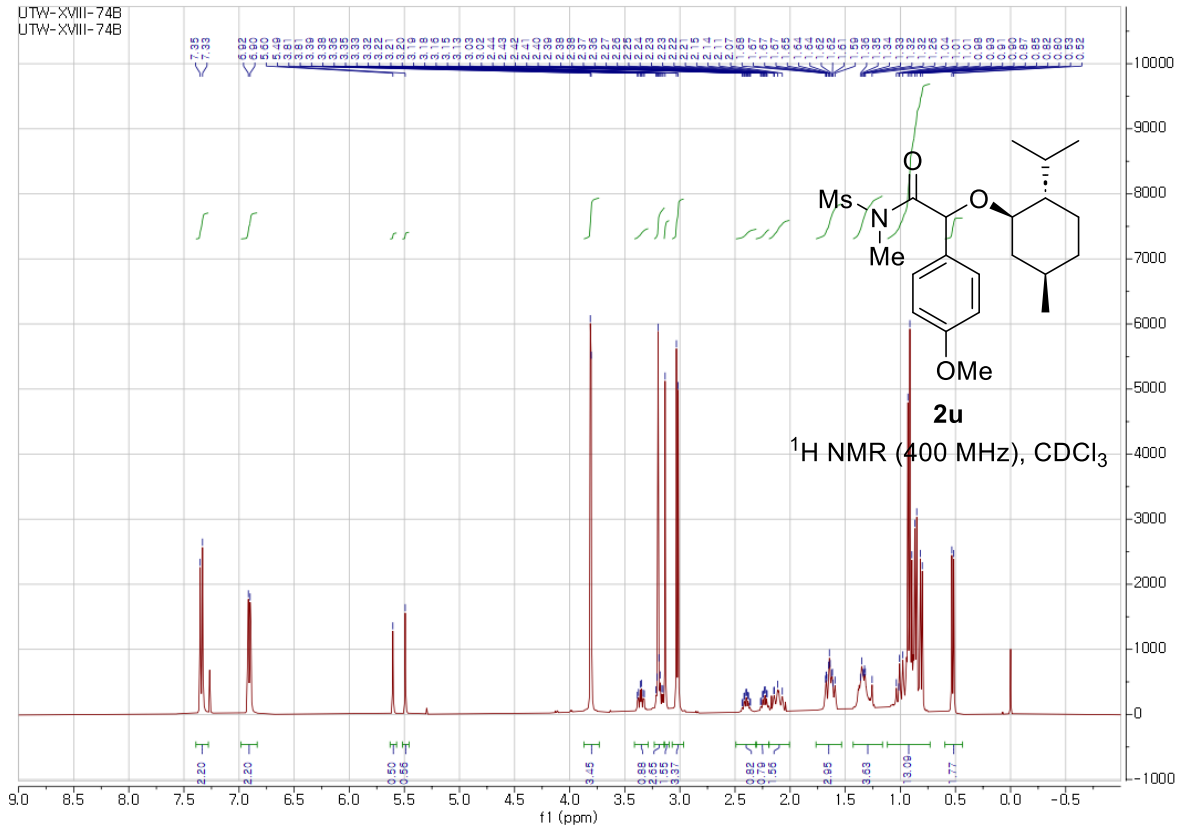

UTW-2S  
UTW-2S

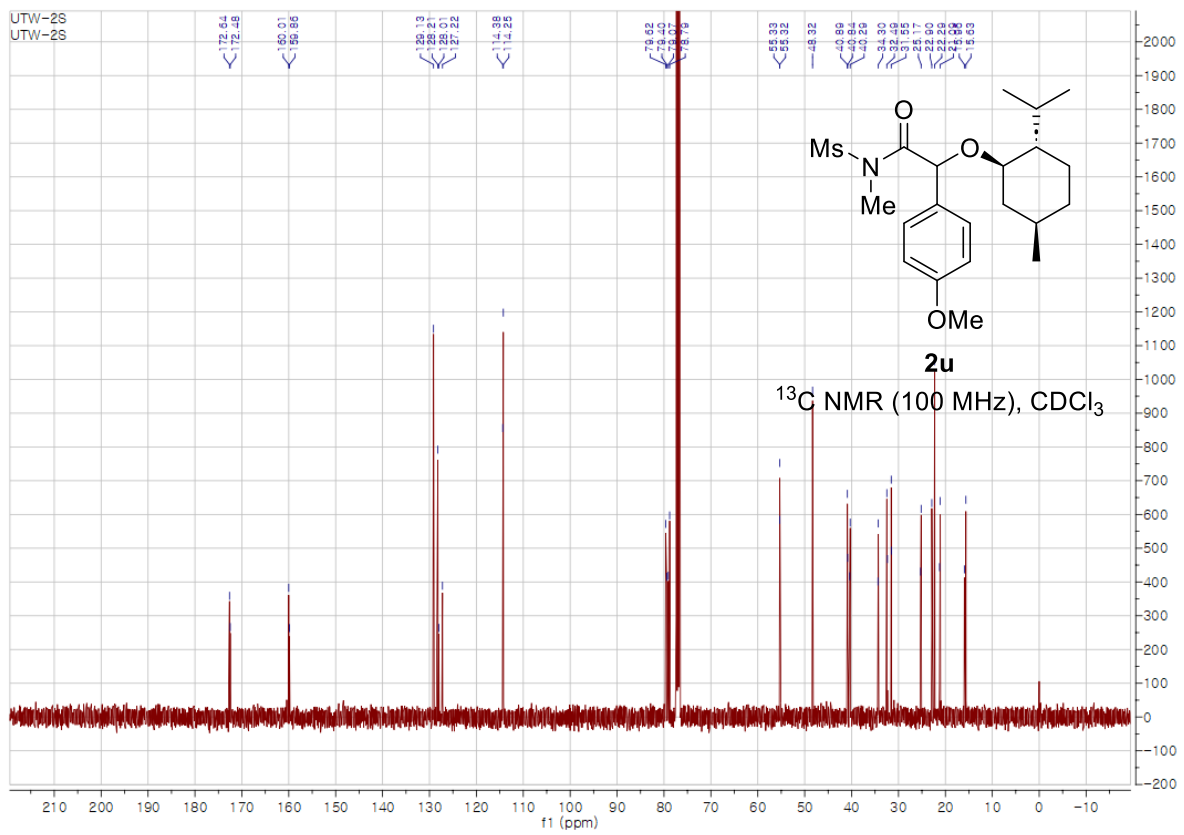

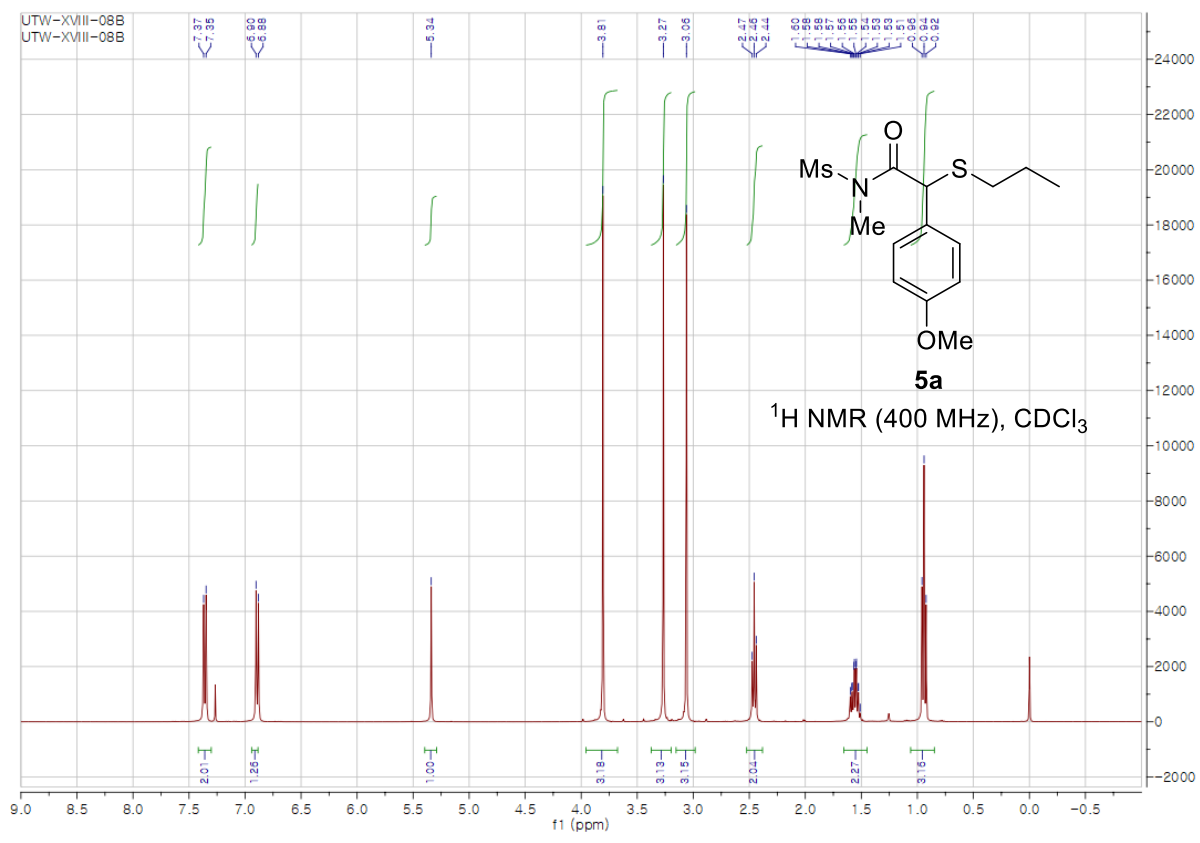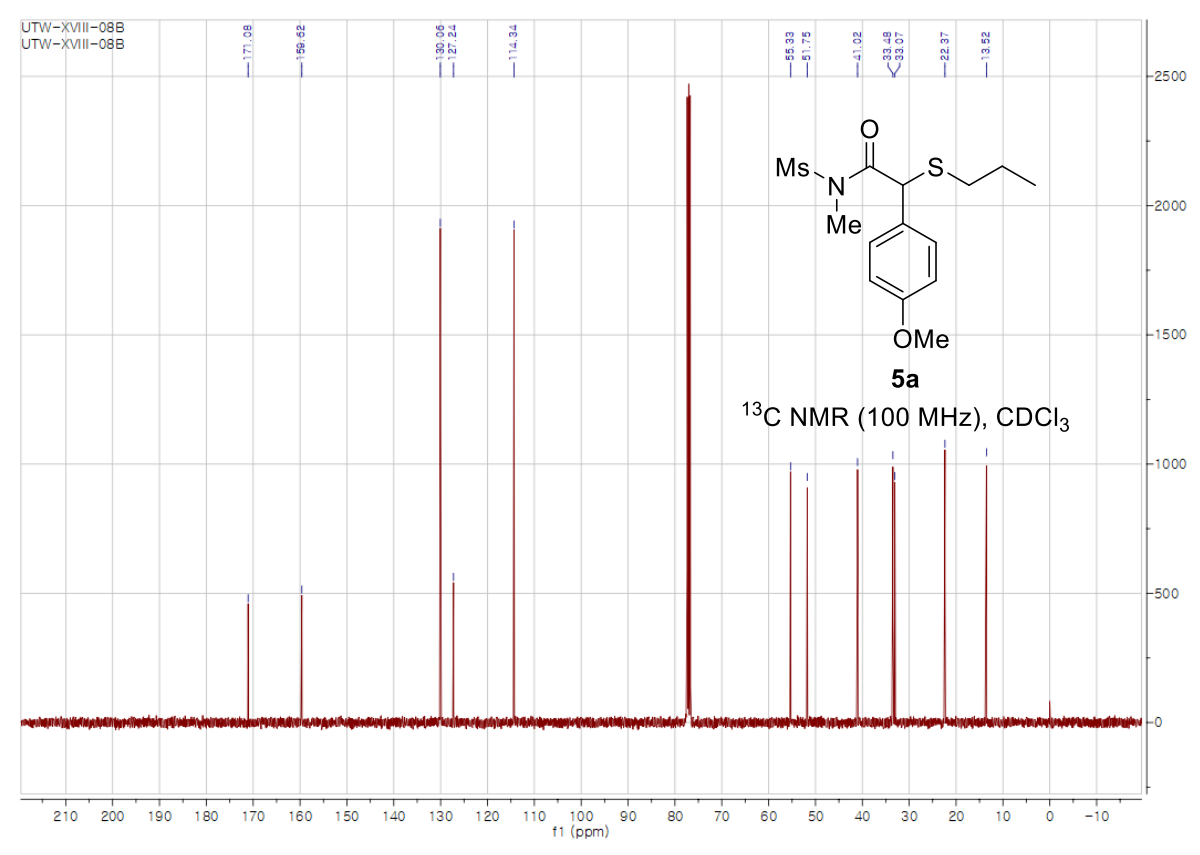

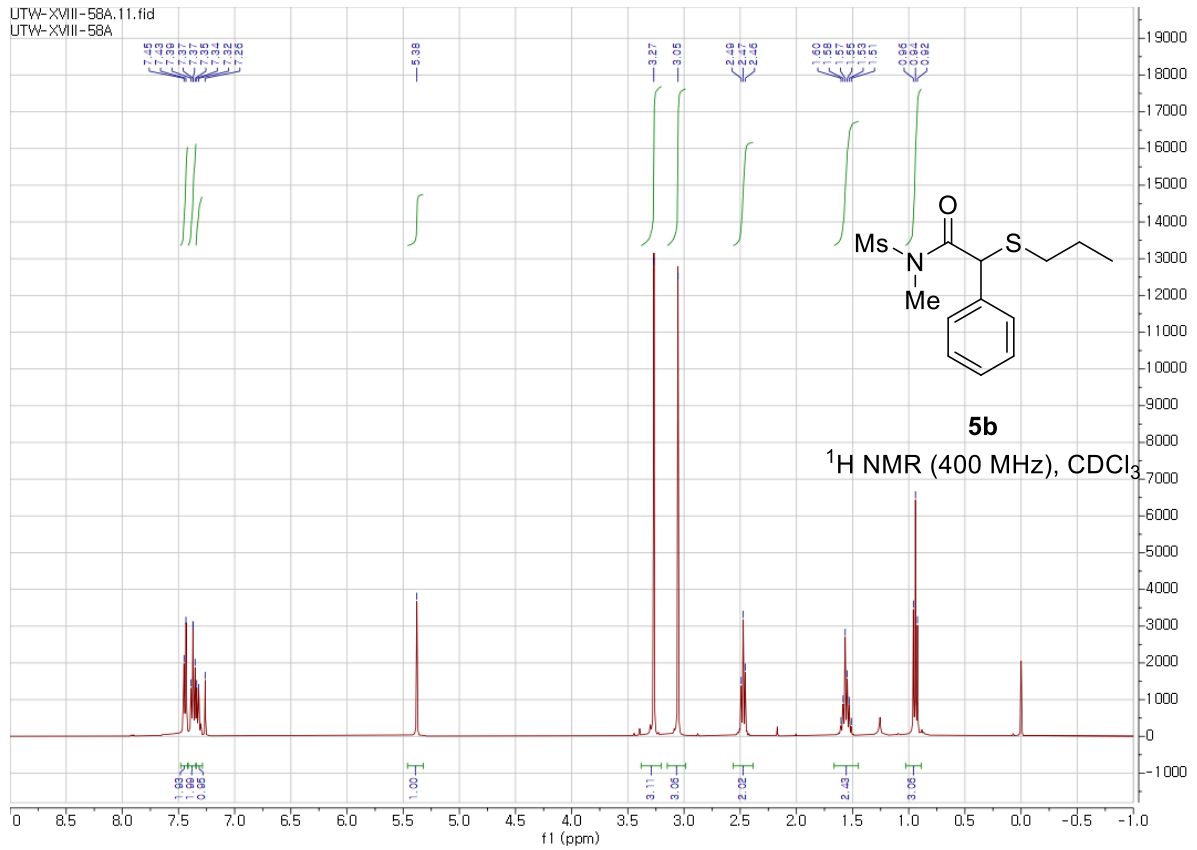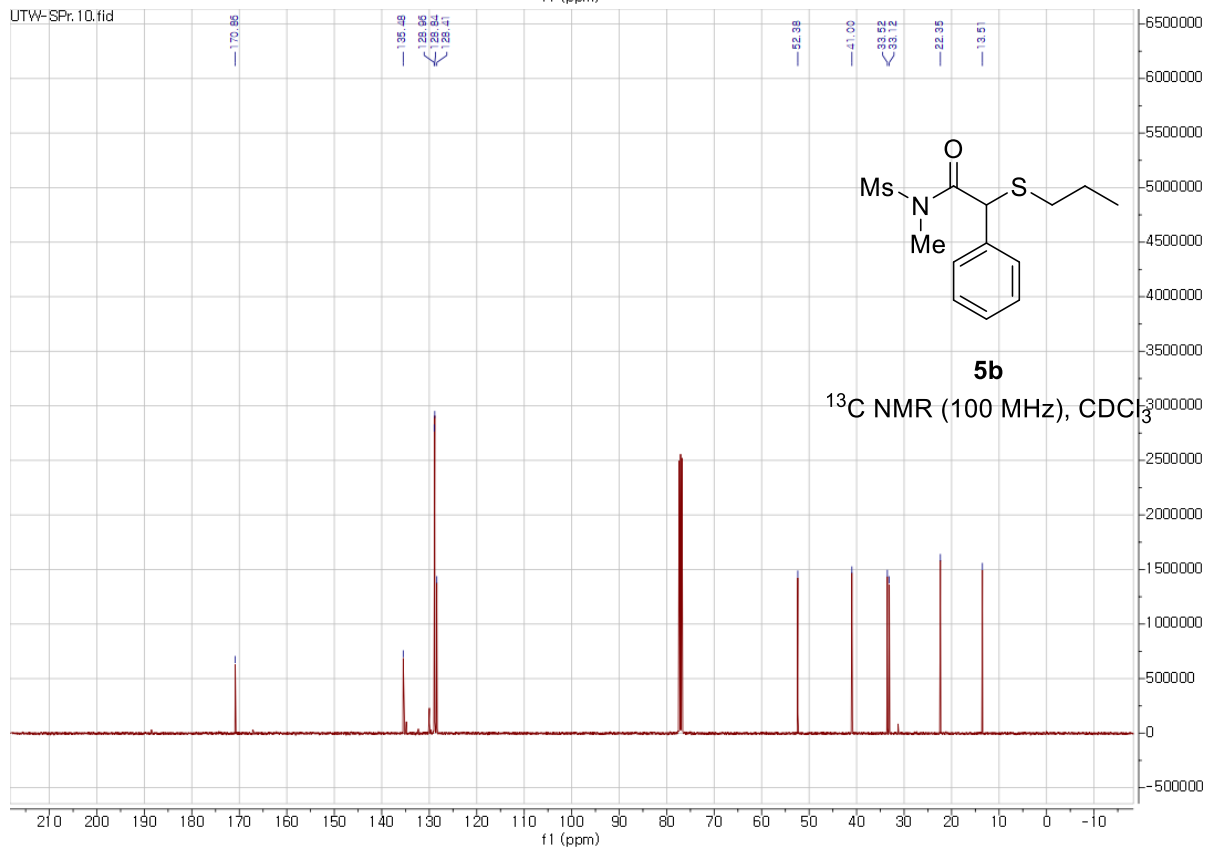

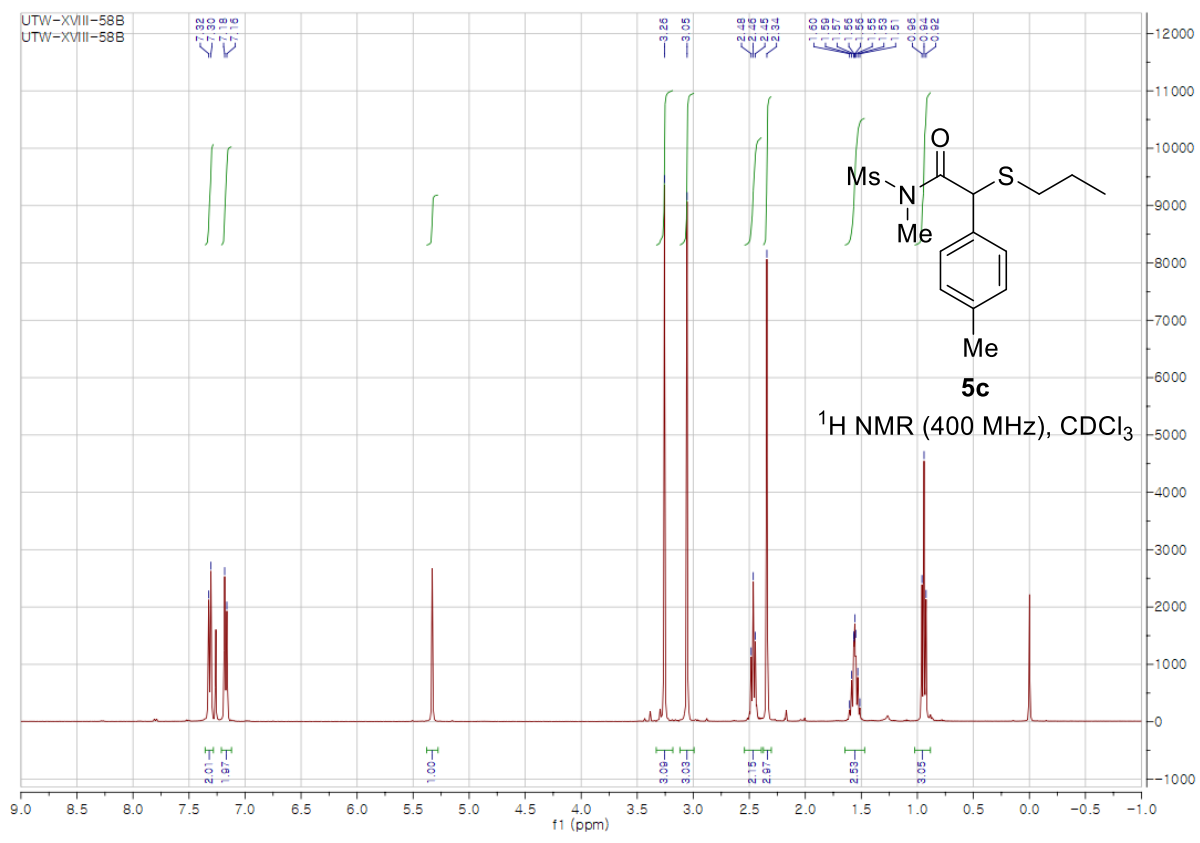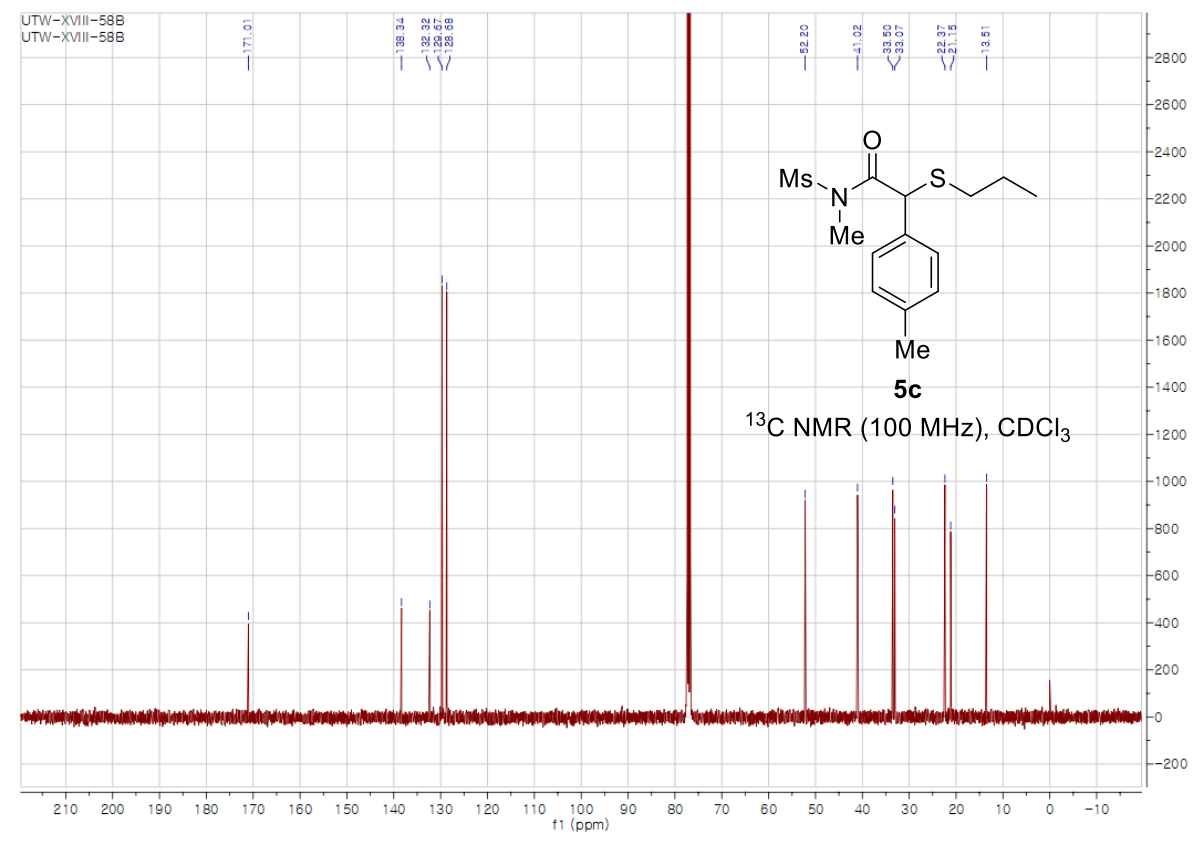

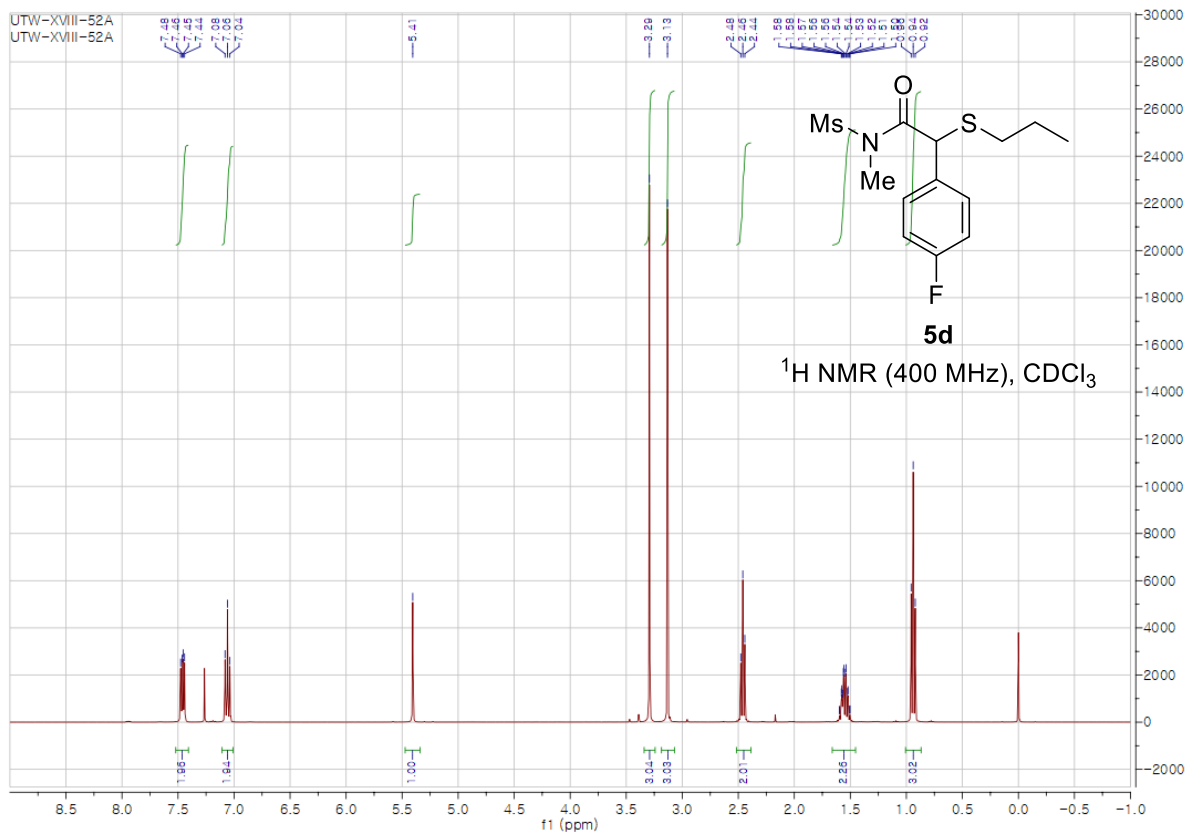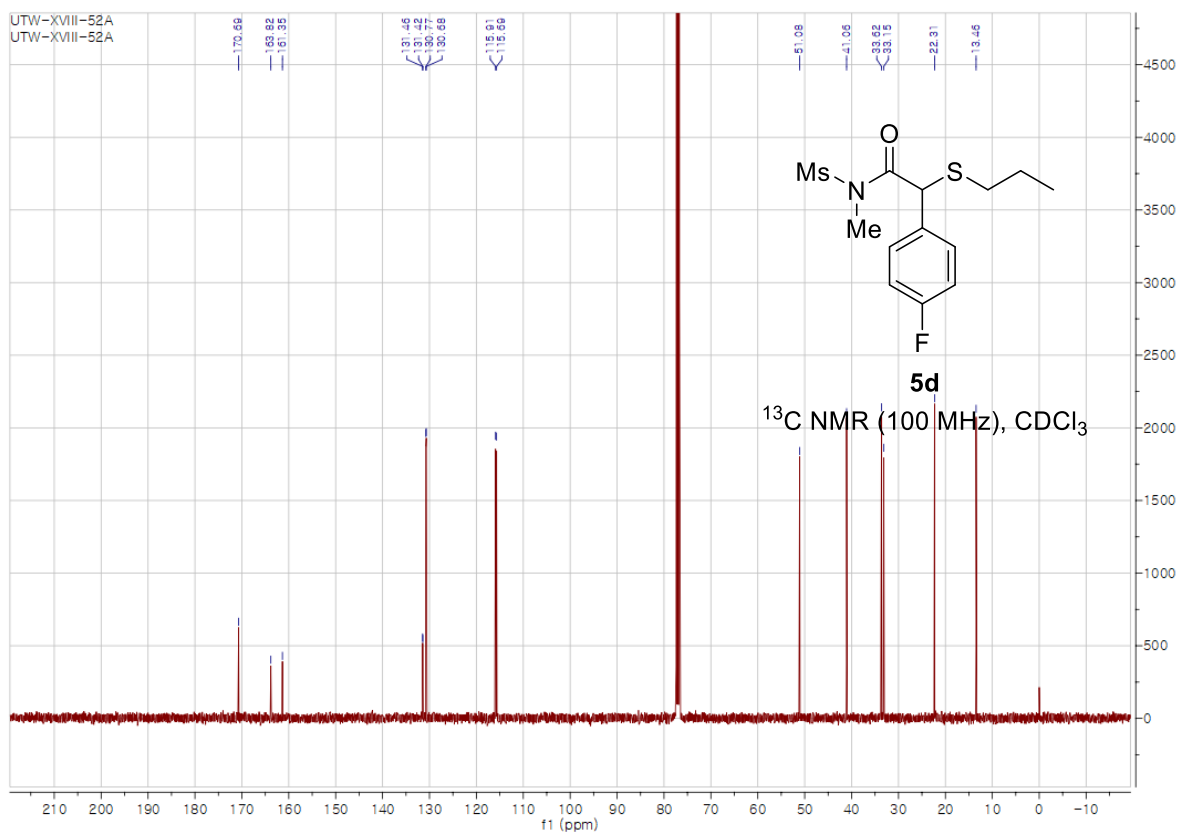

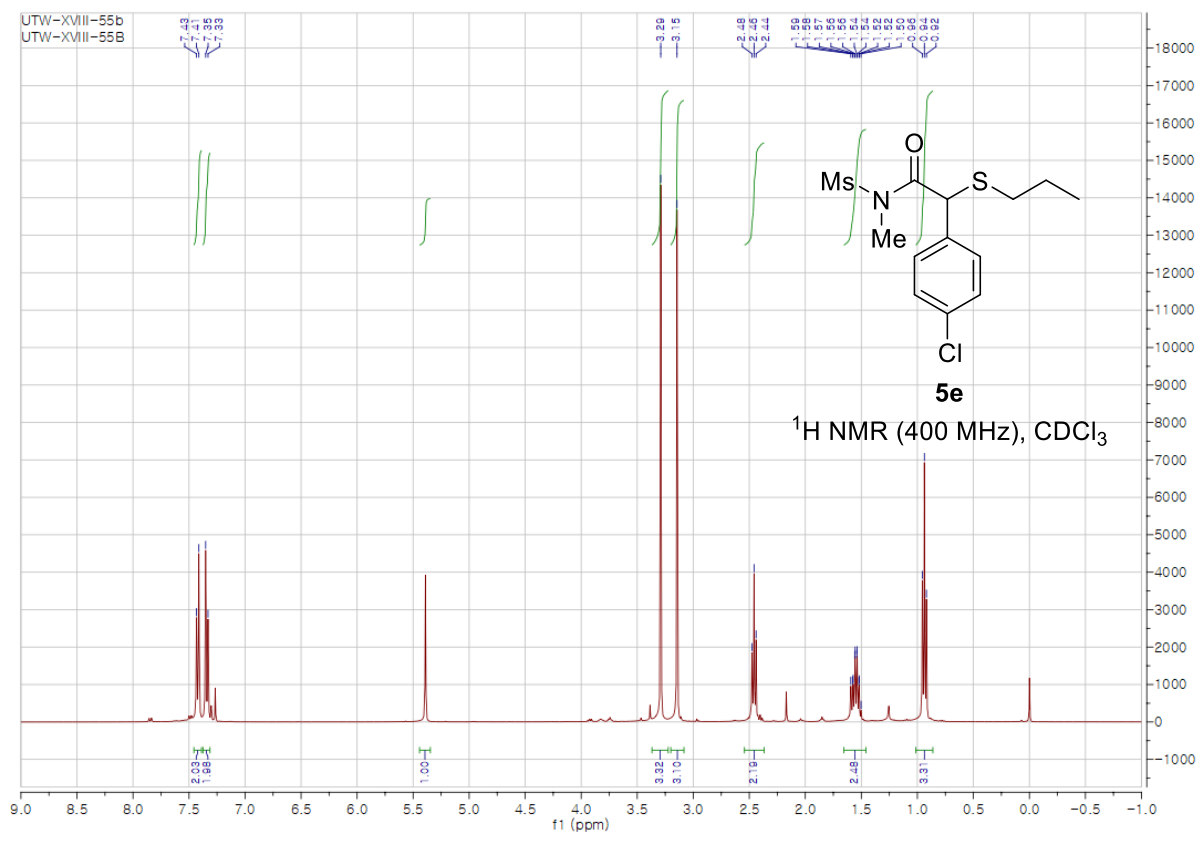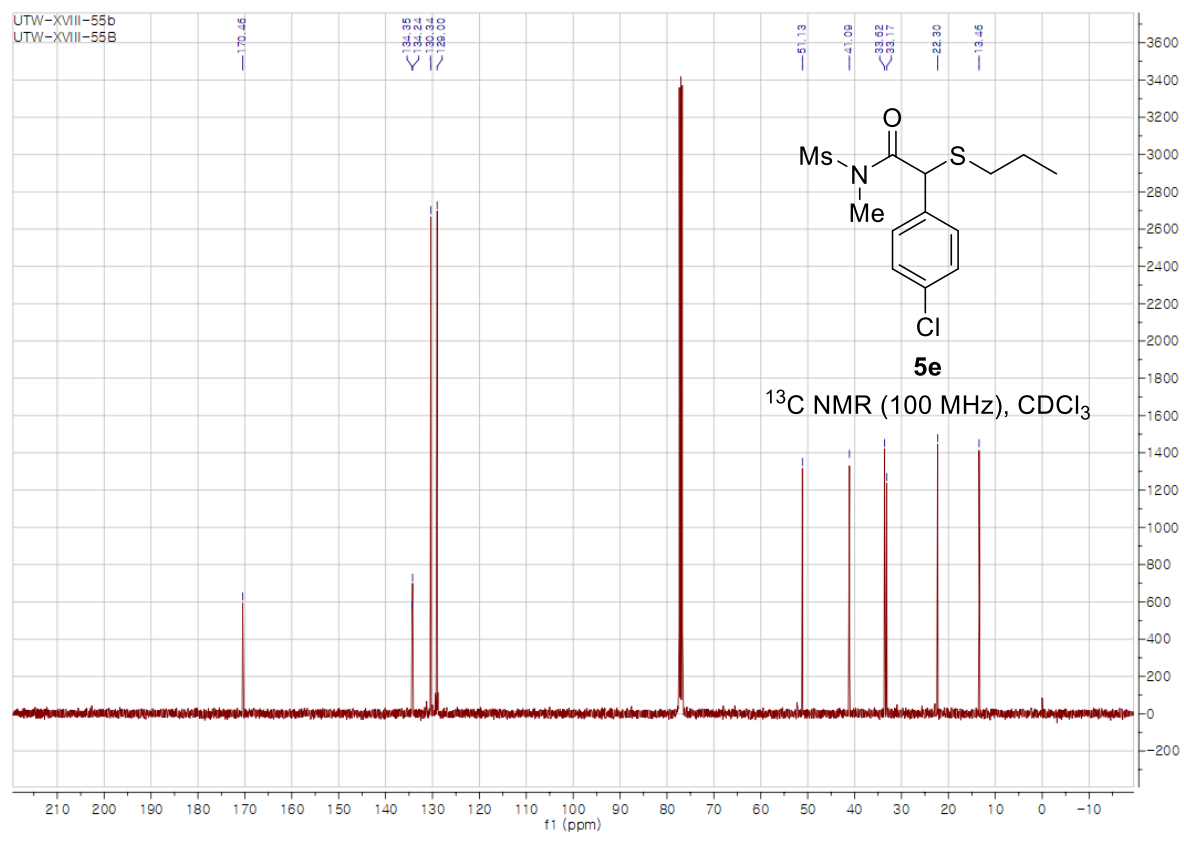

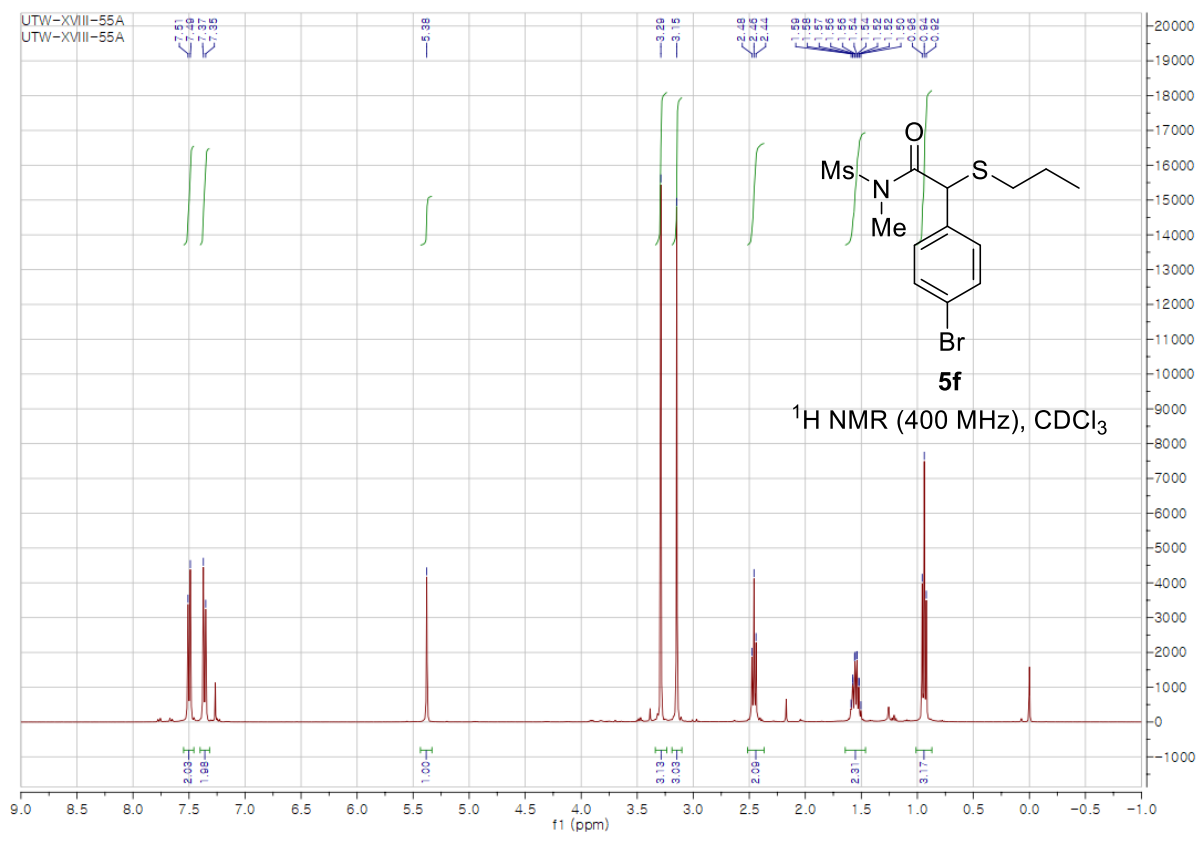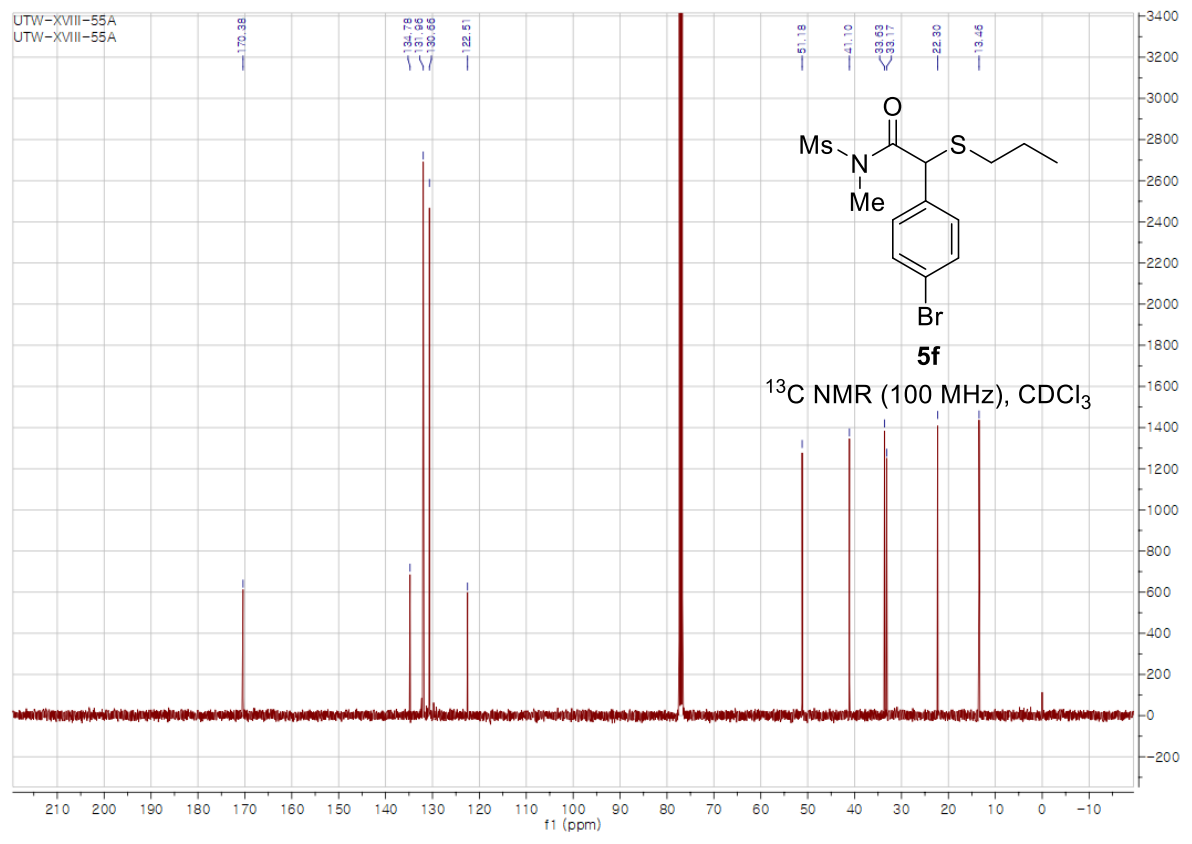



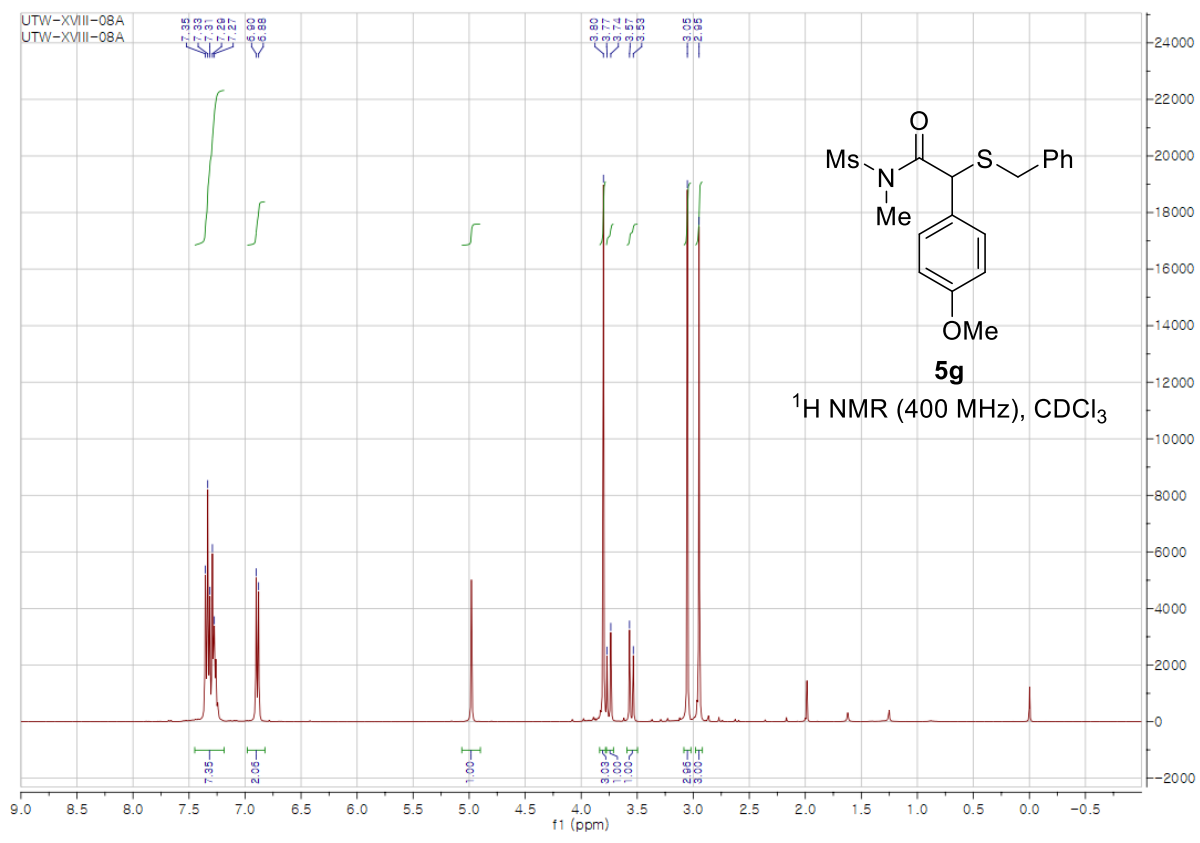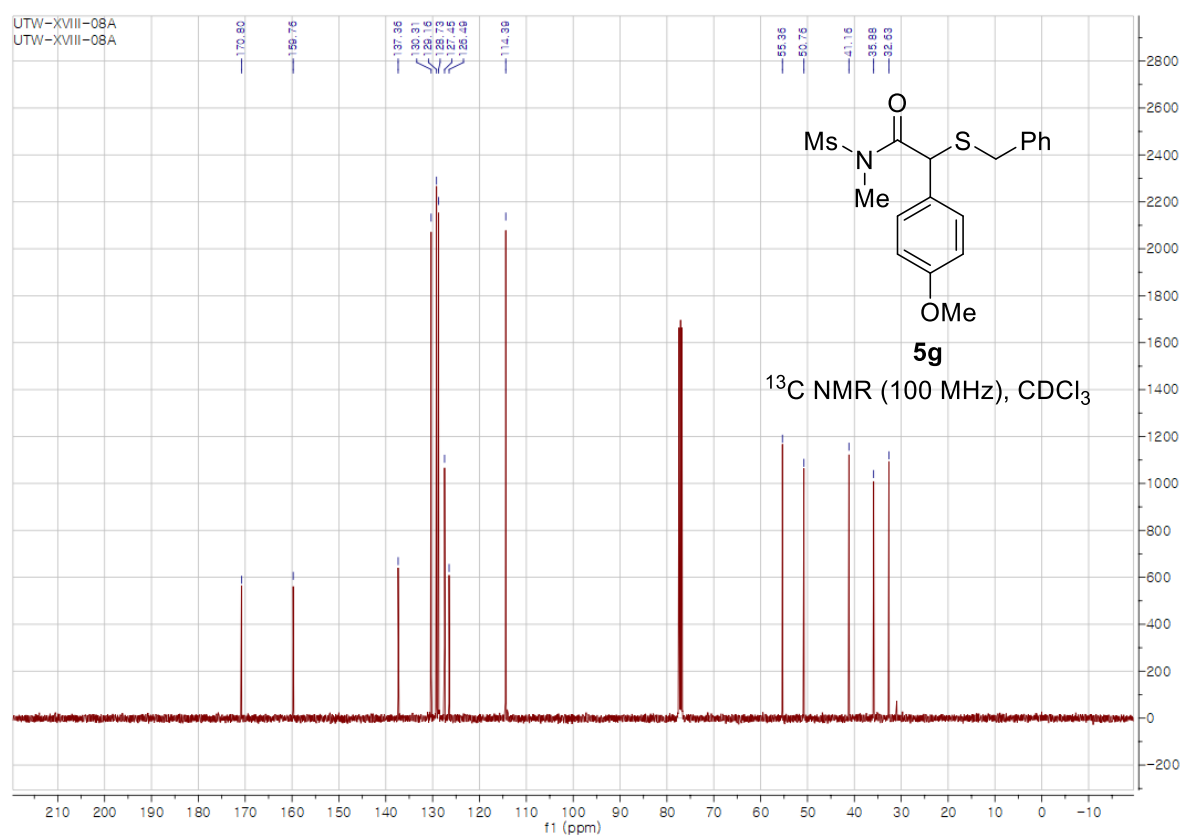

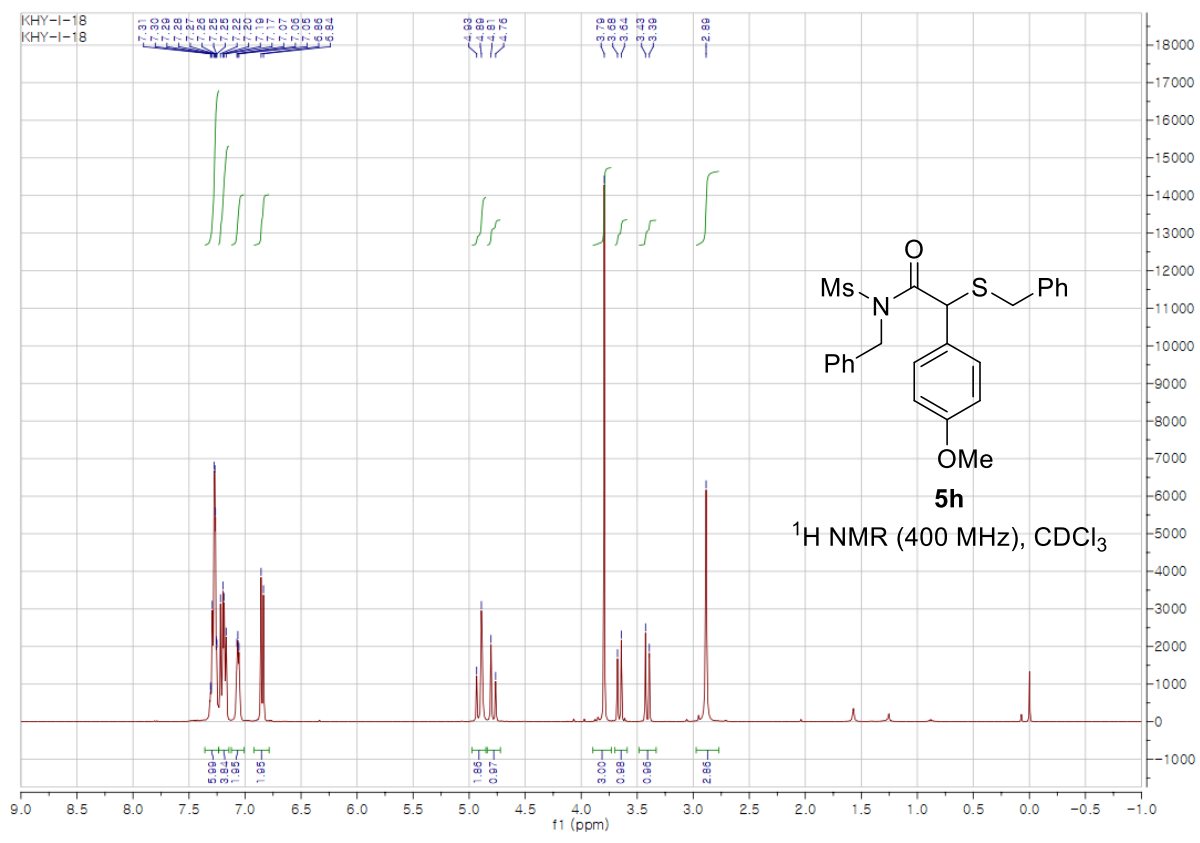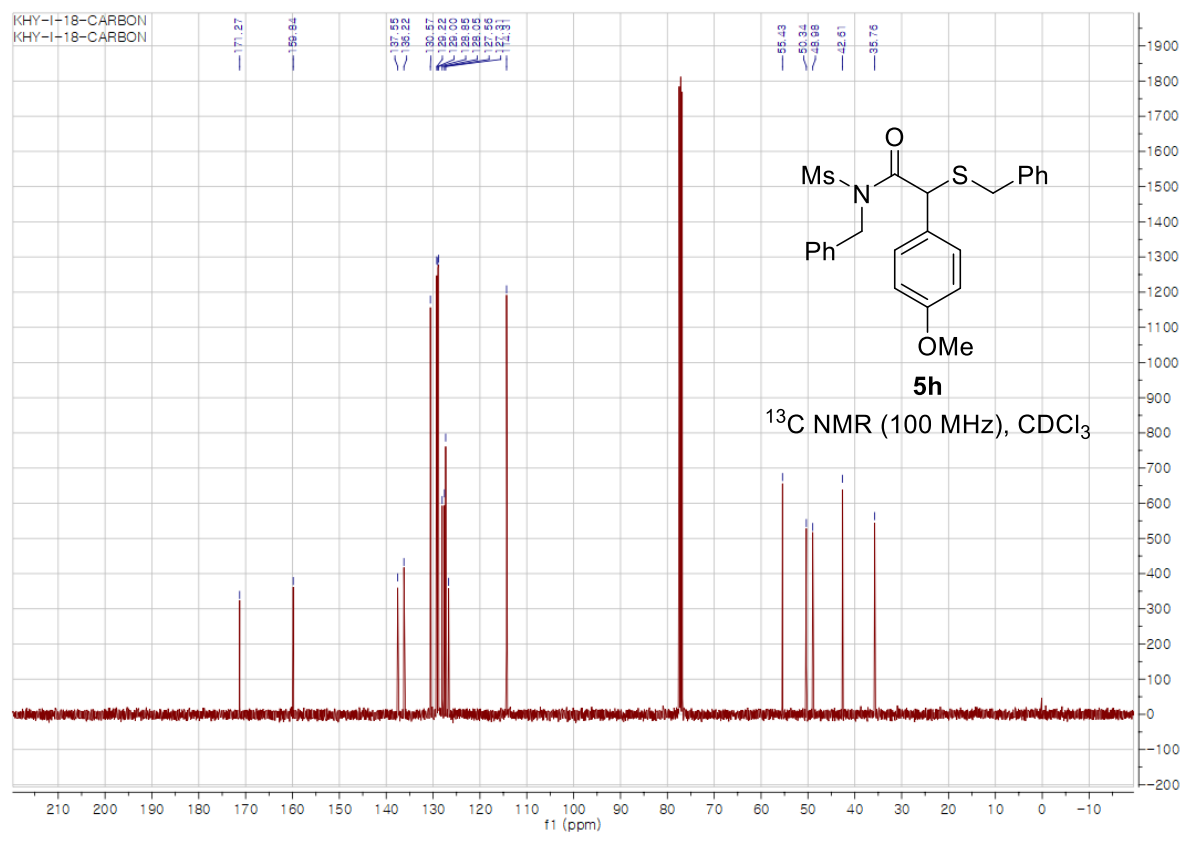

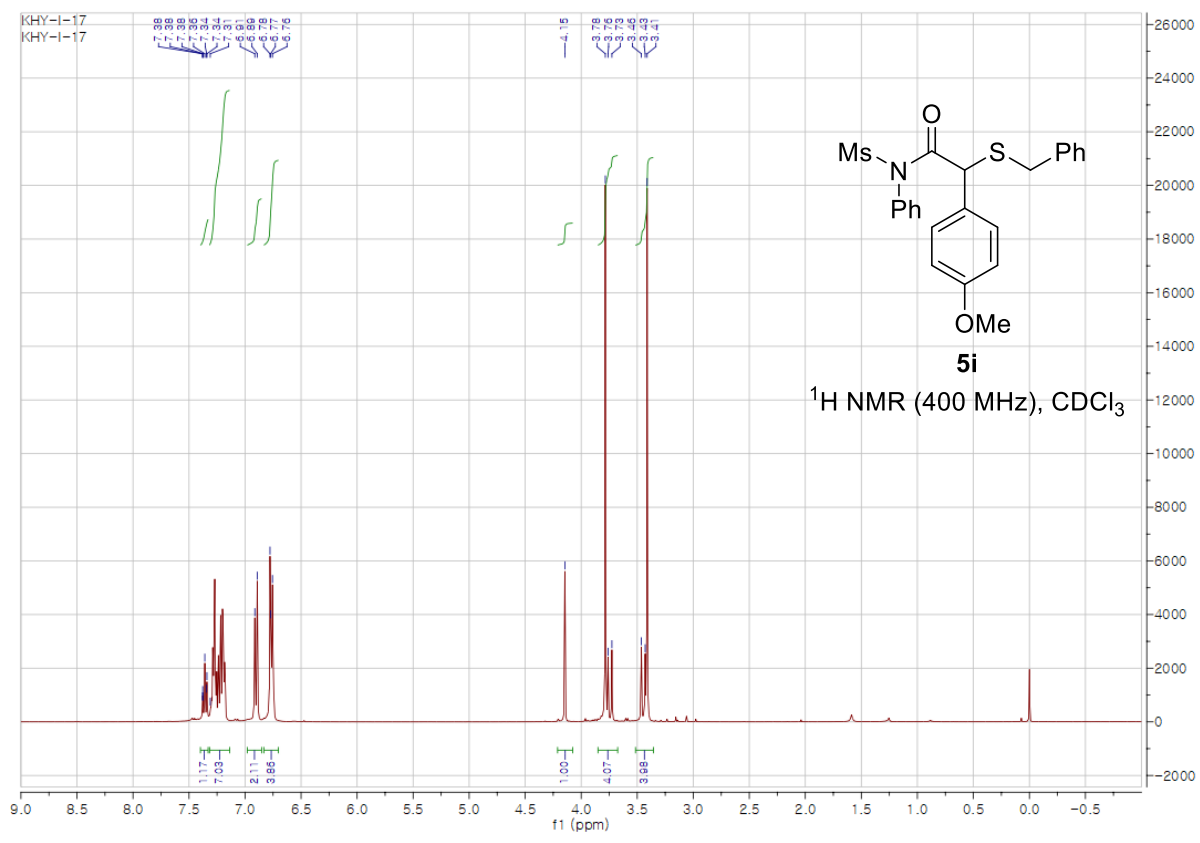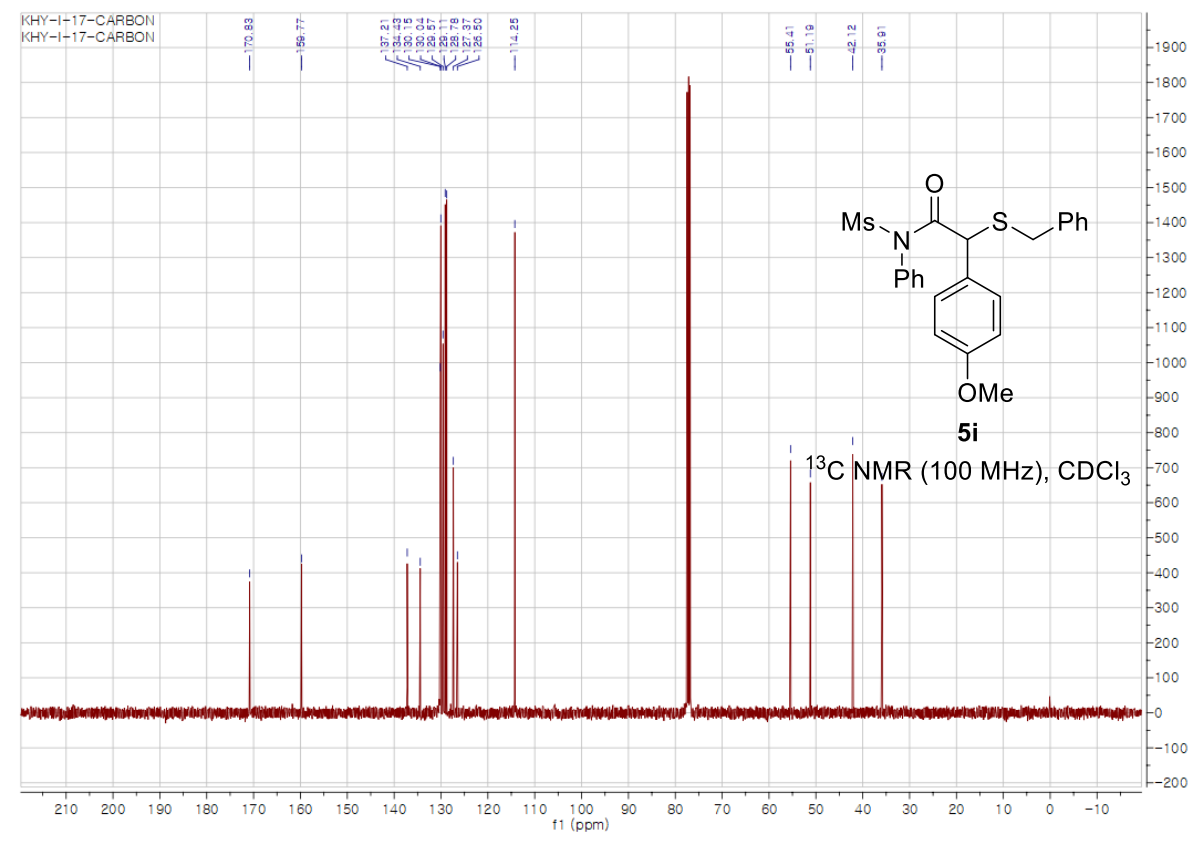



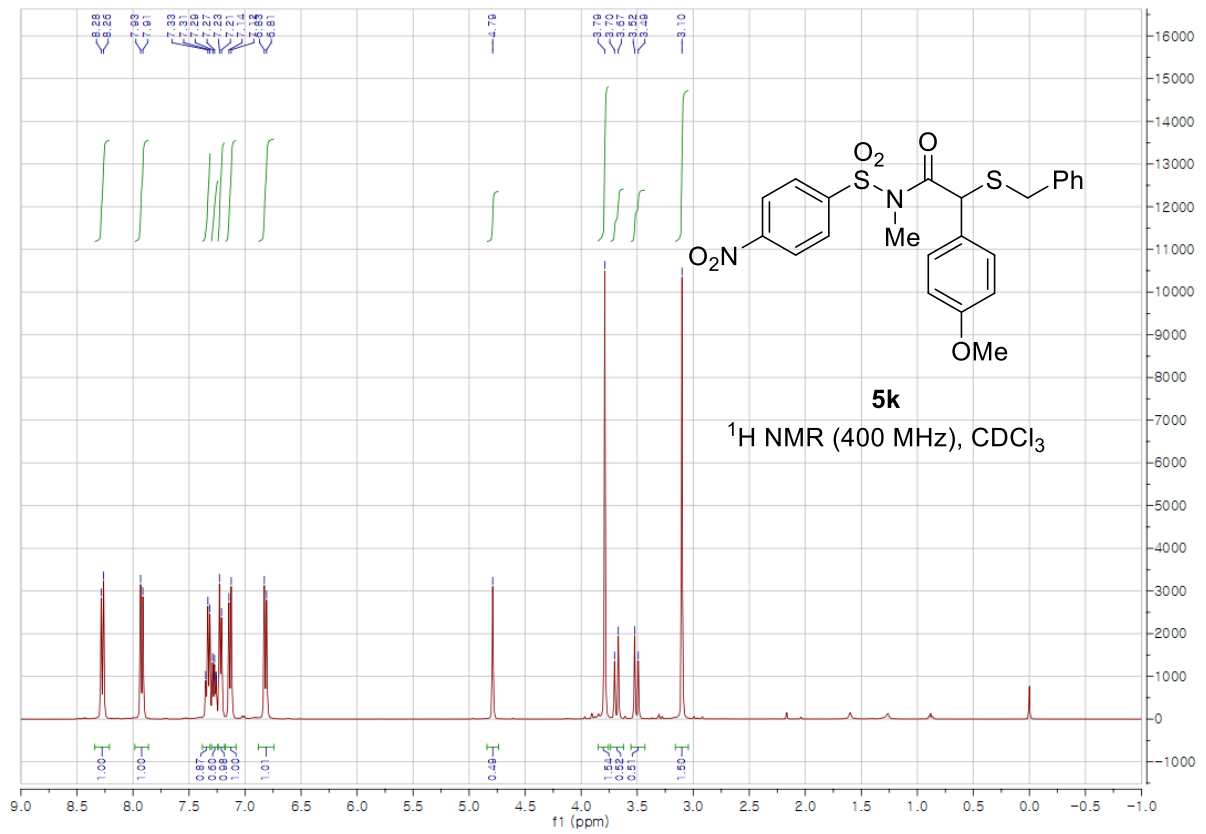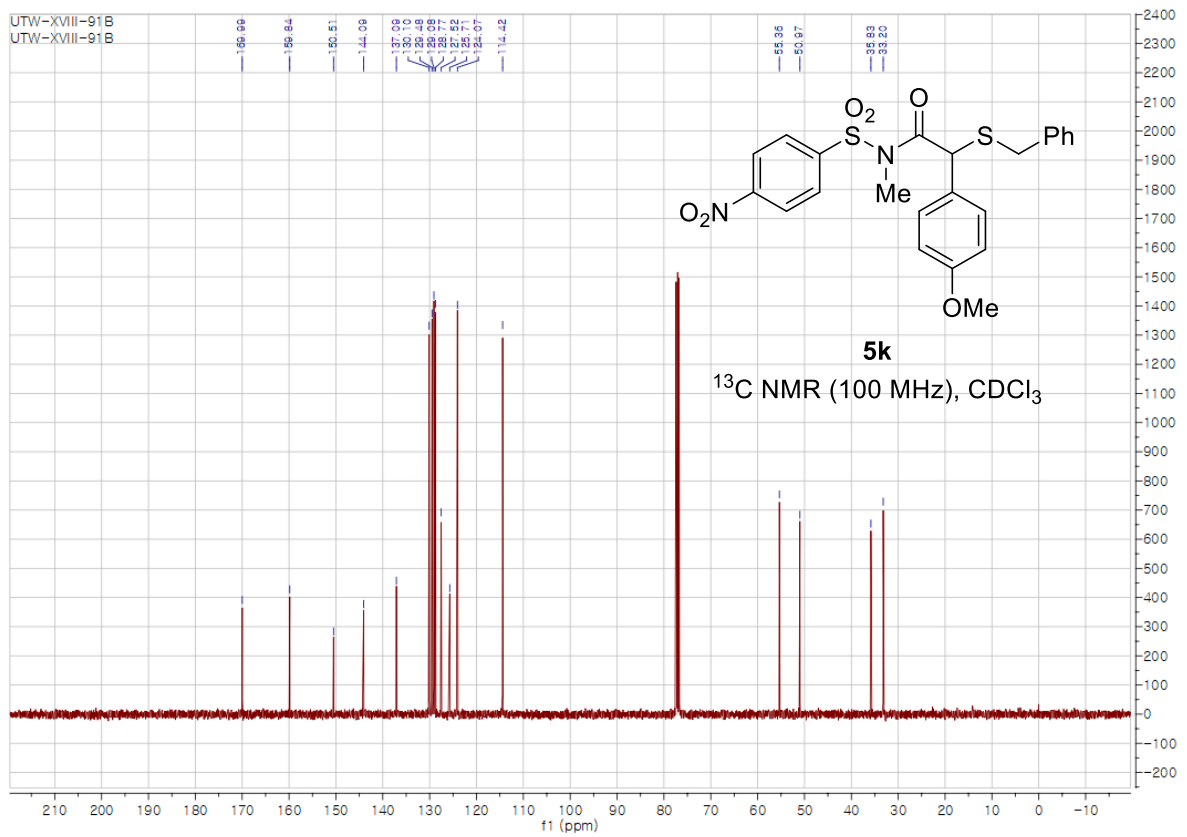

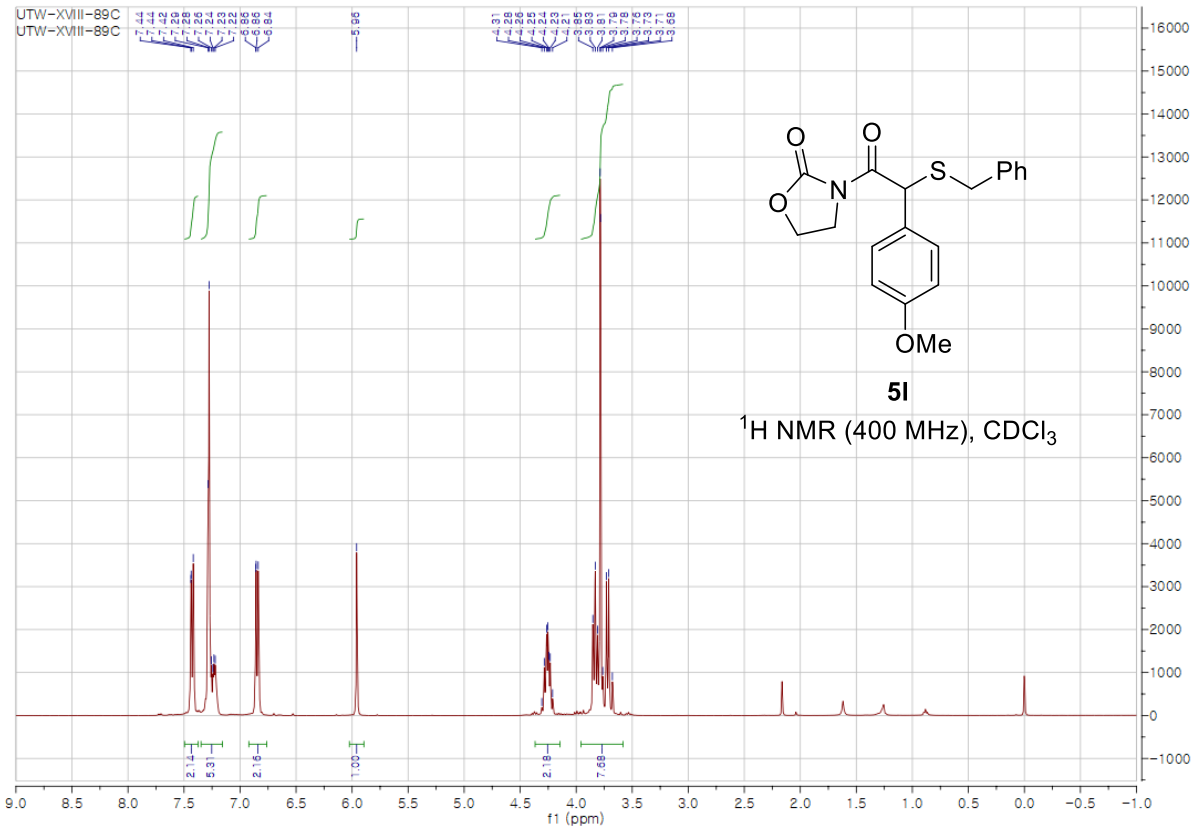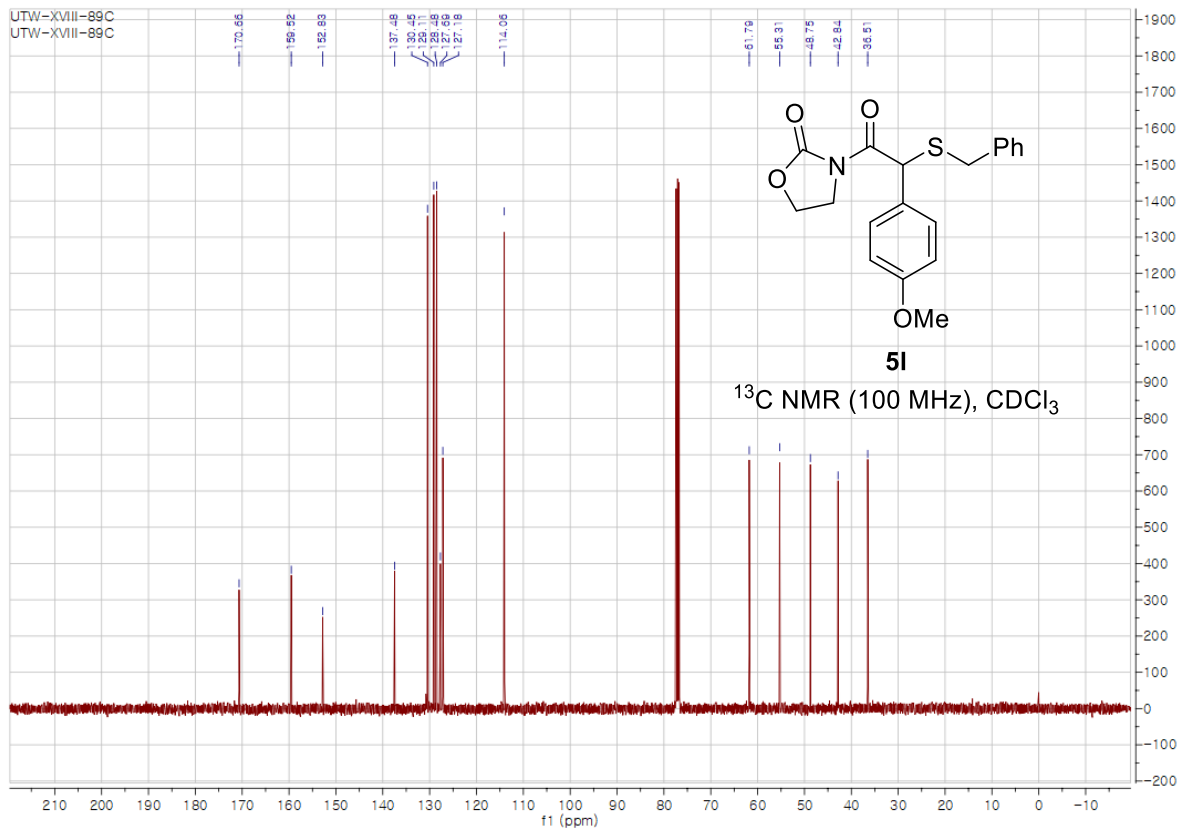

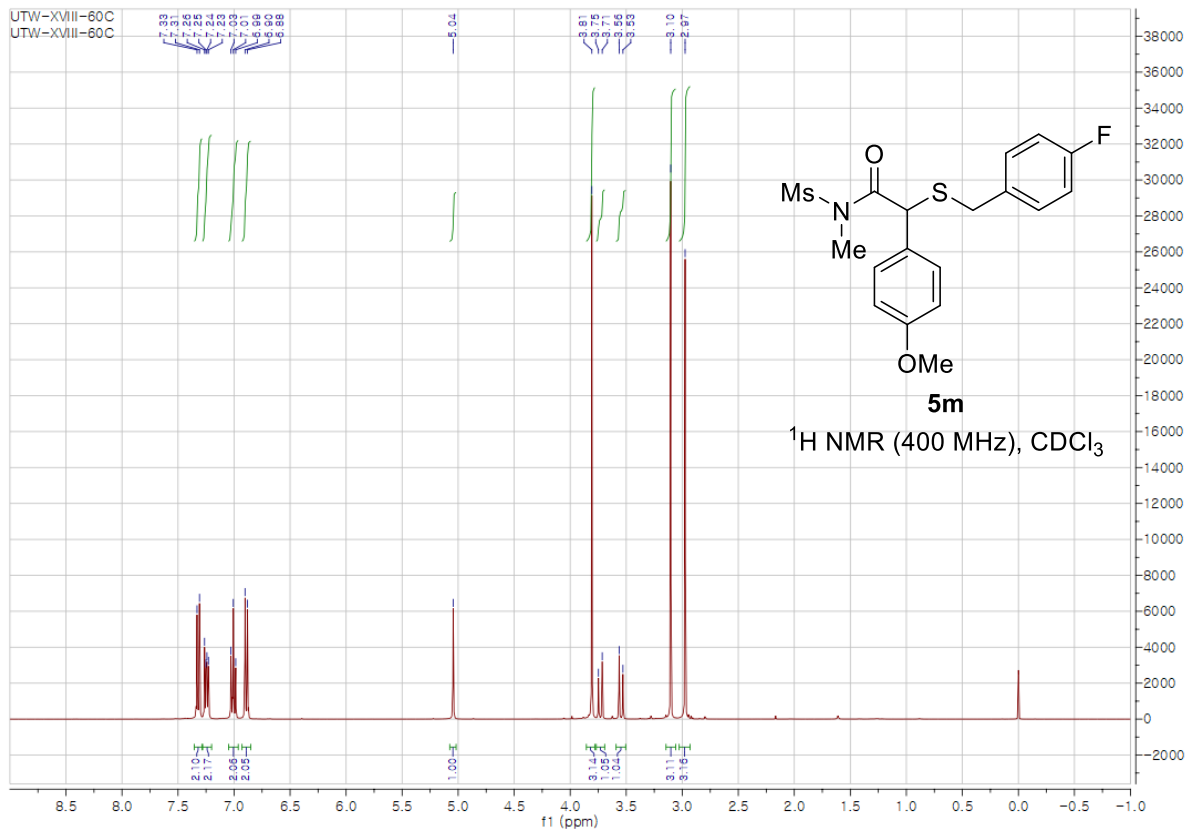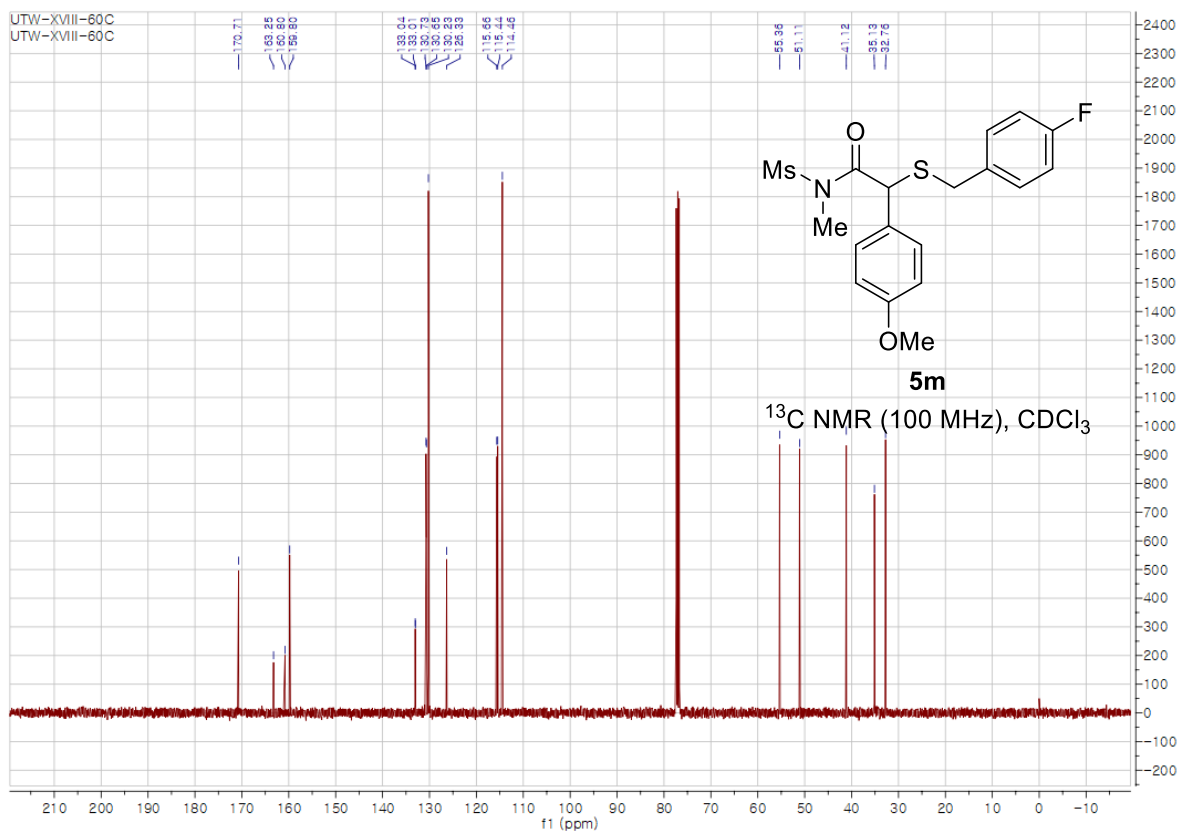

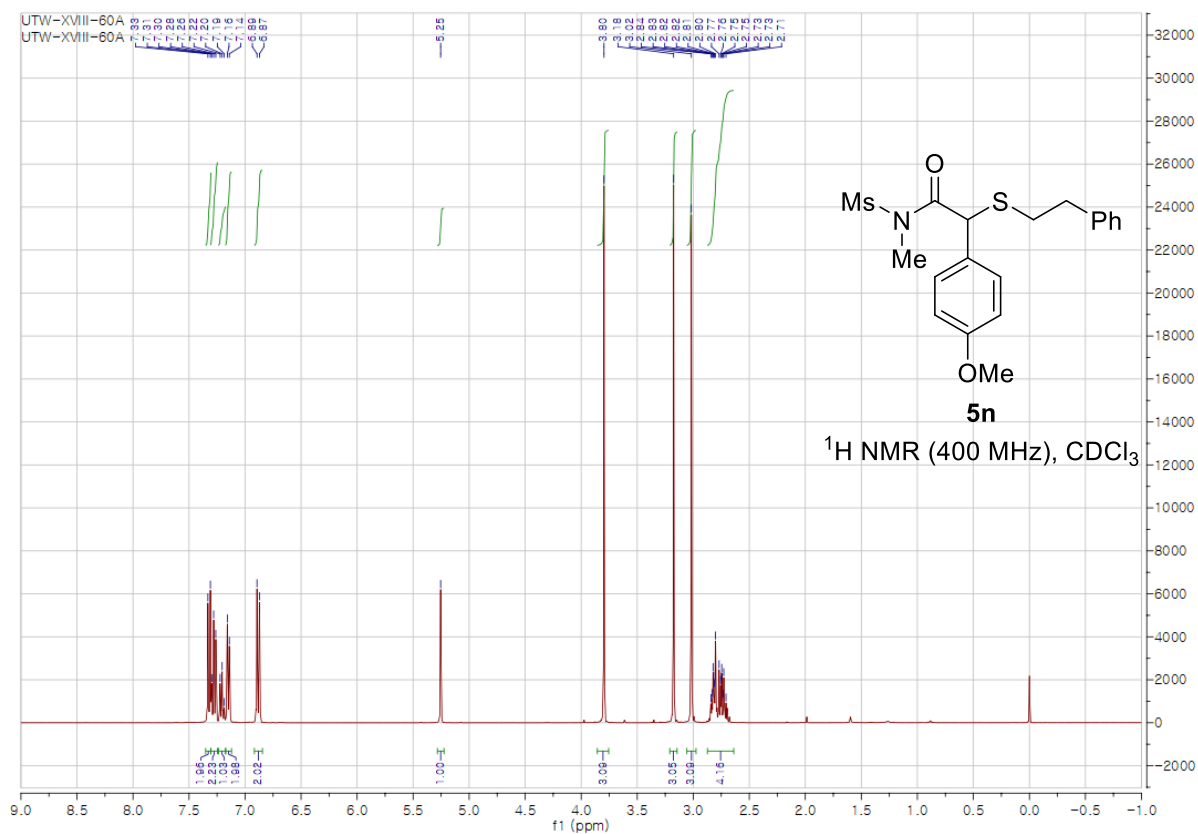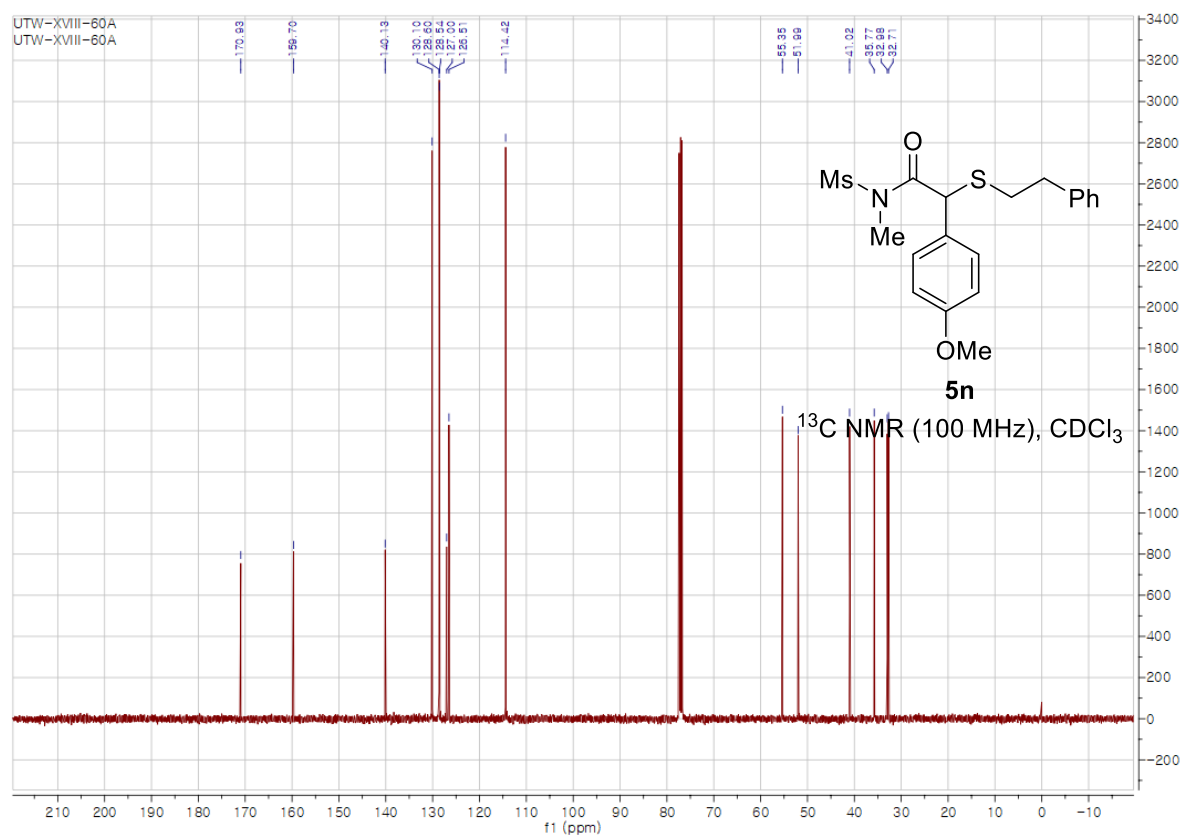



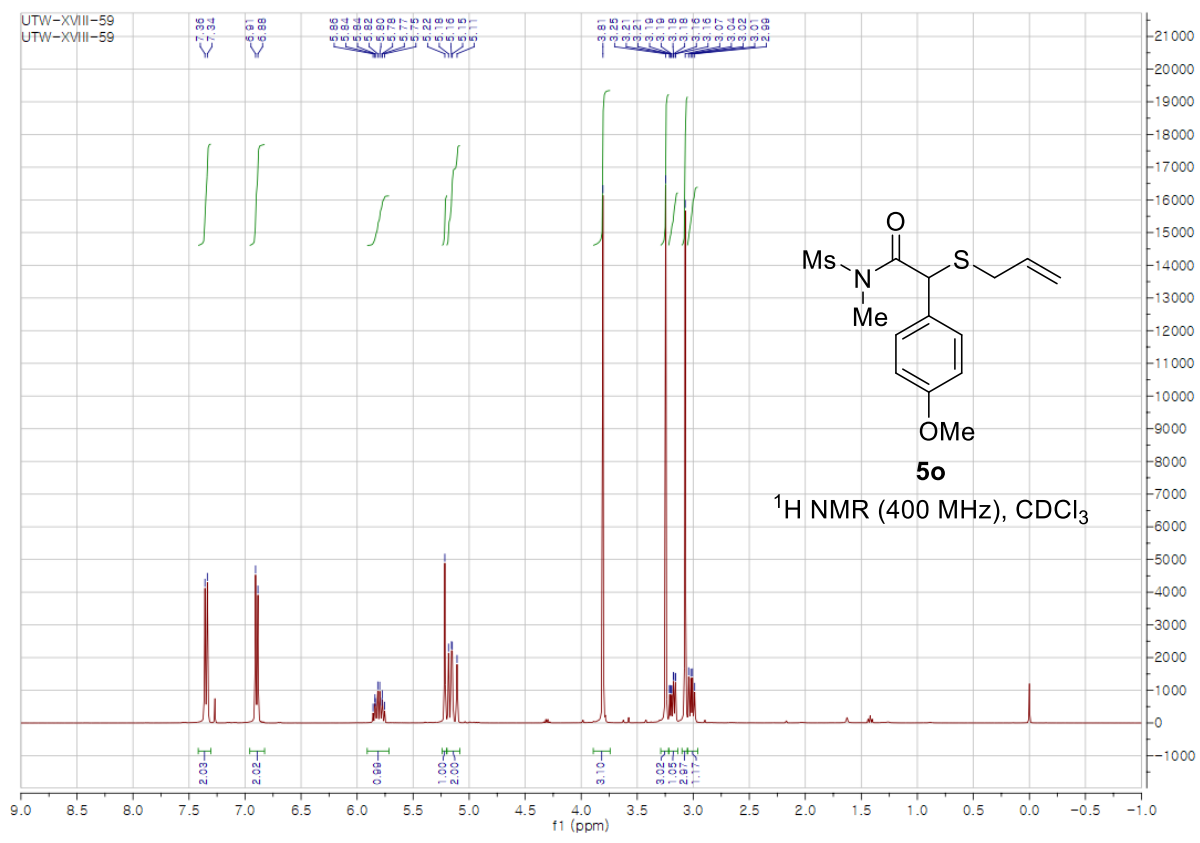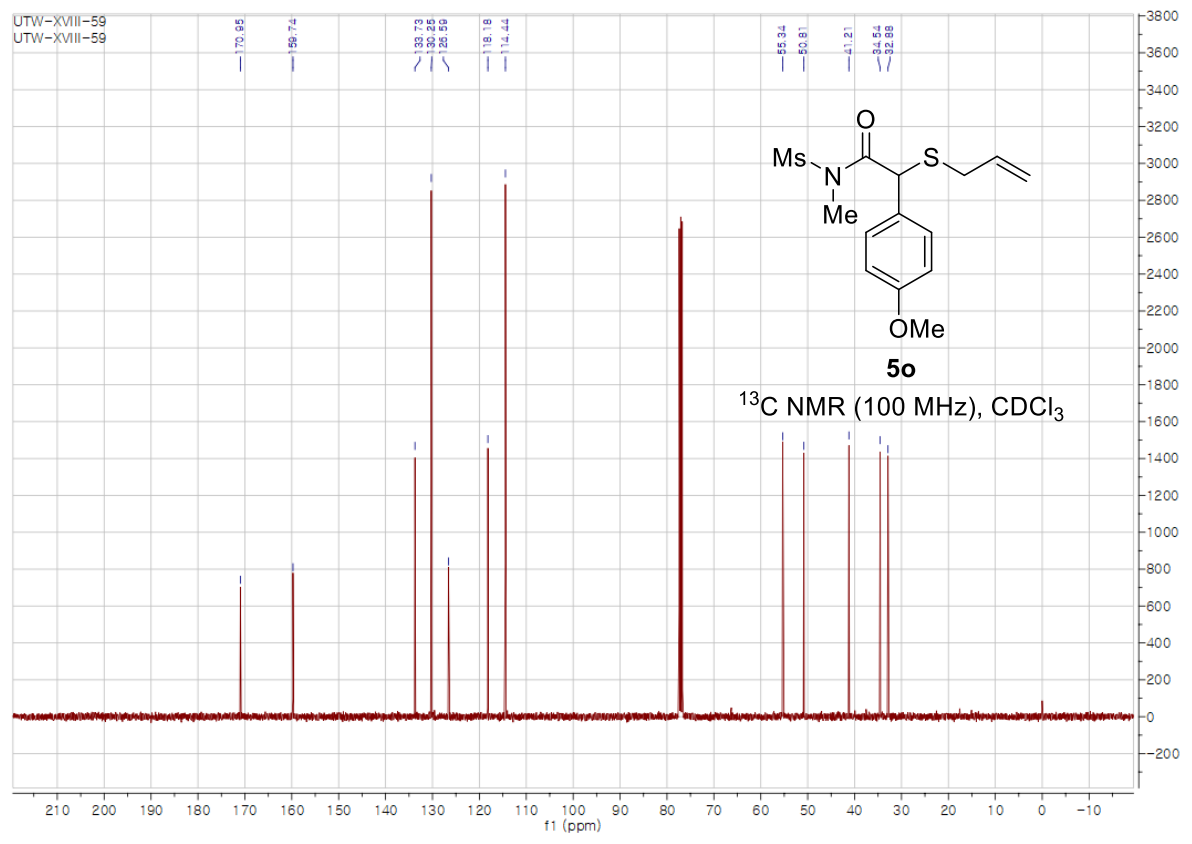

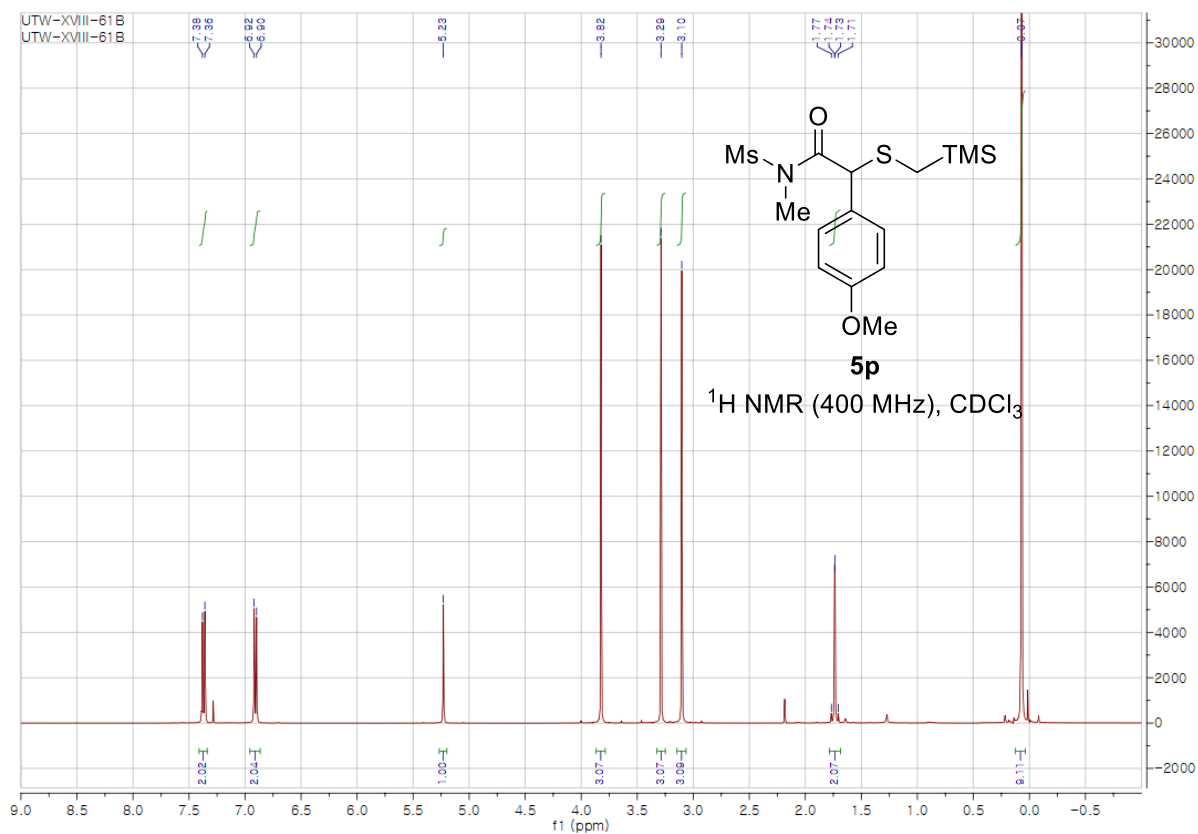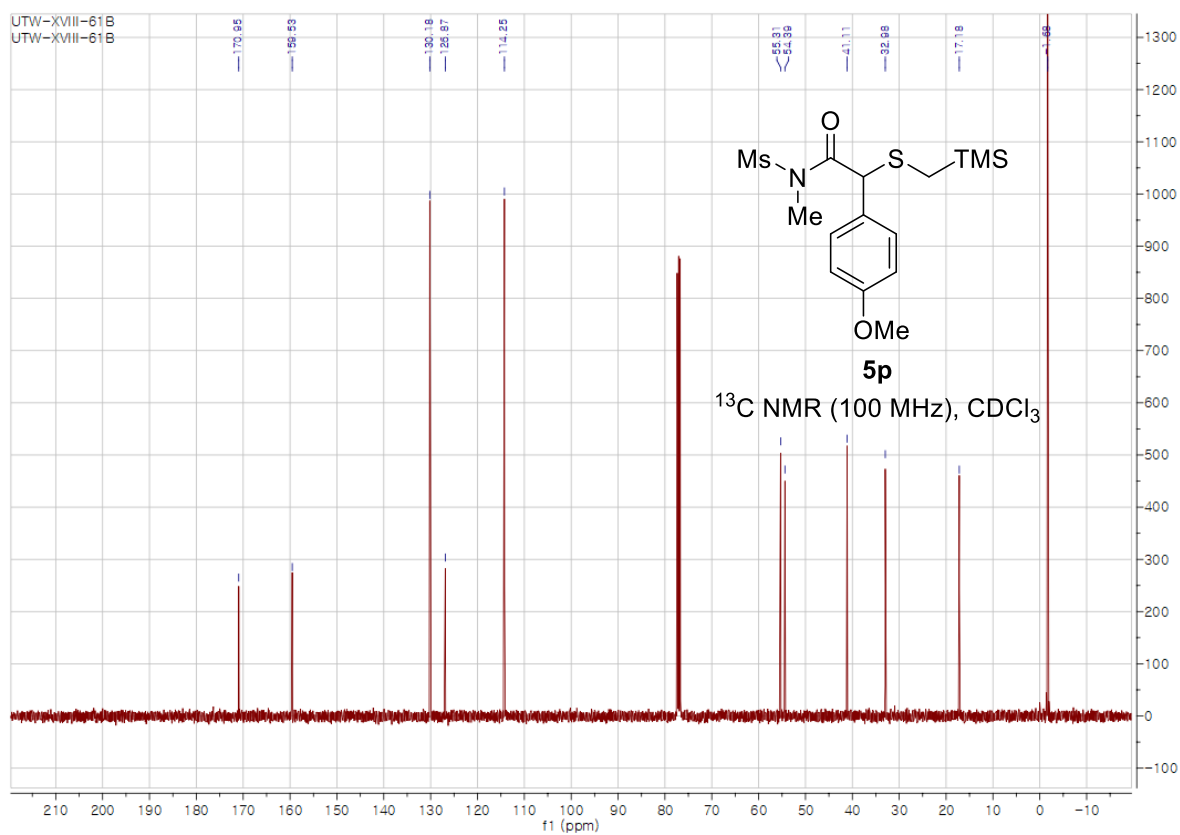

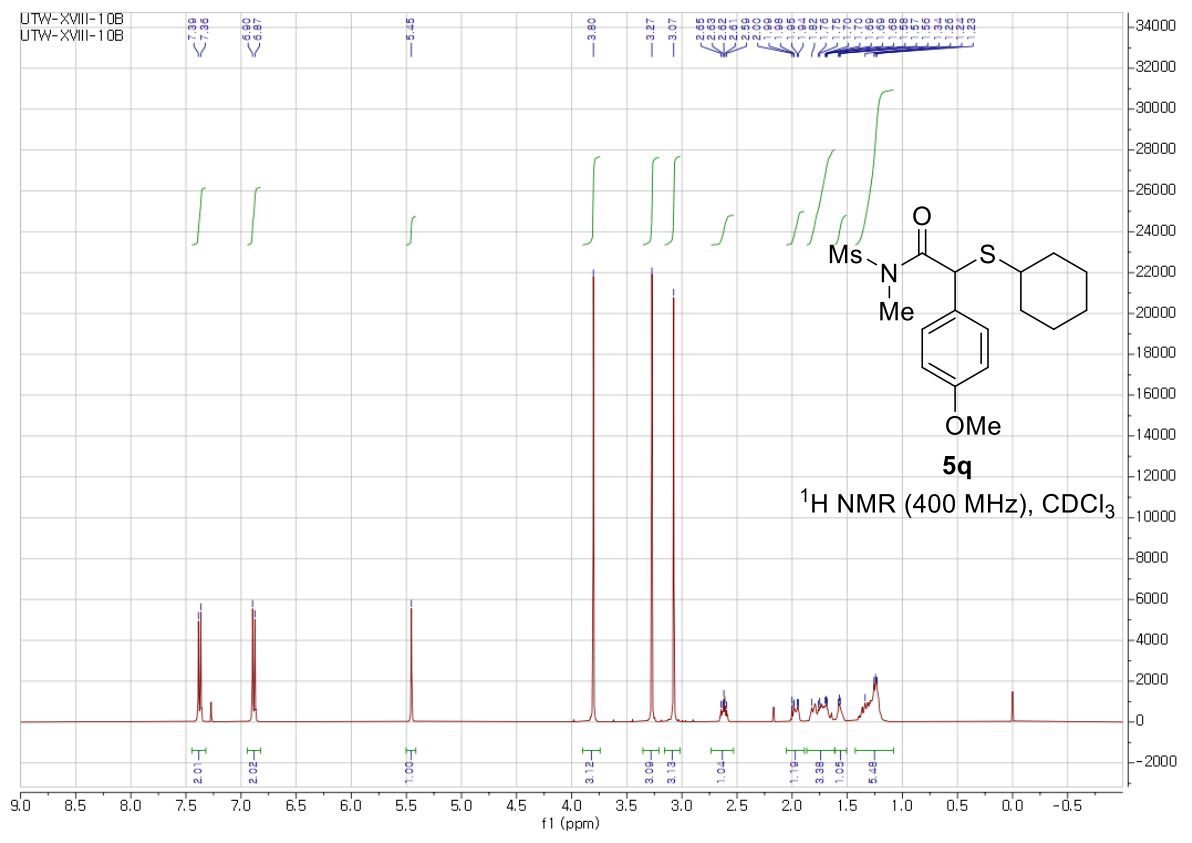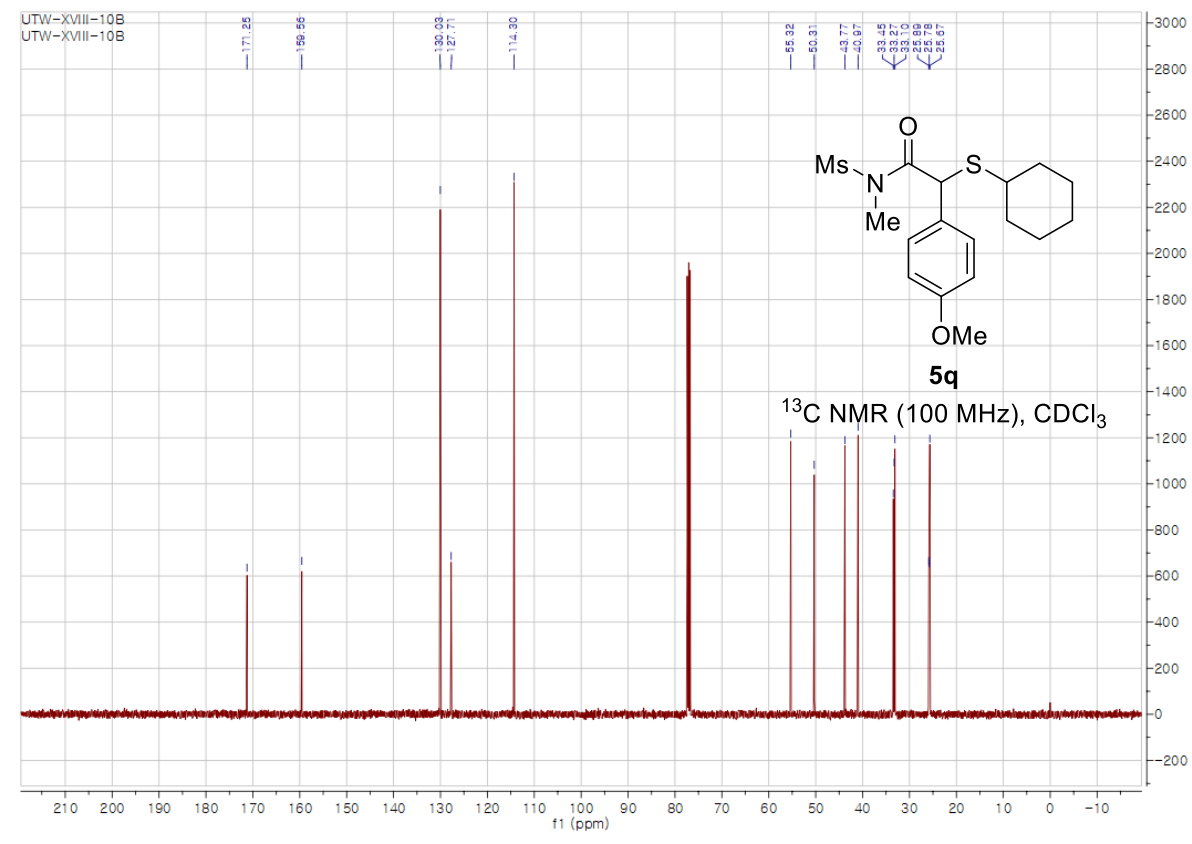

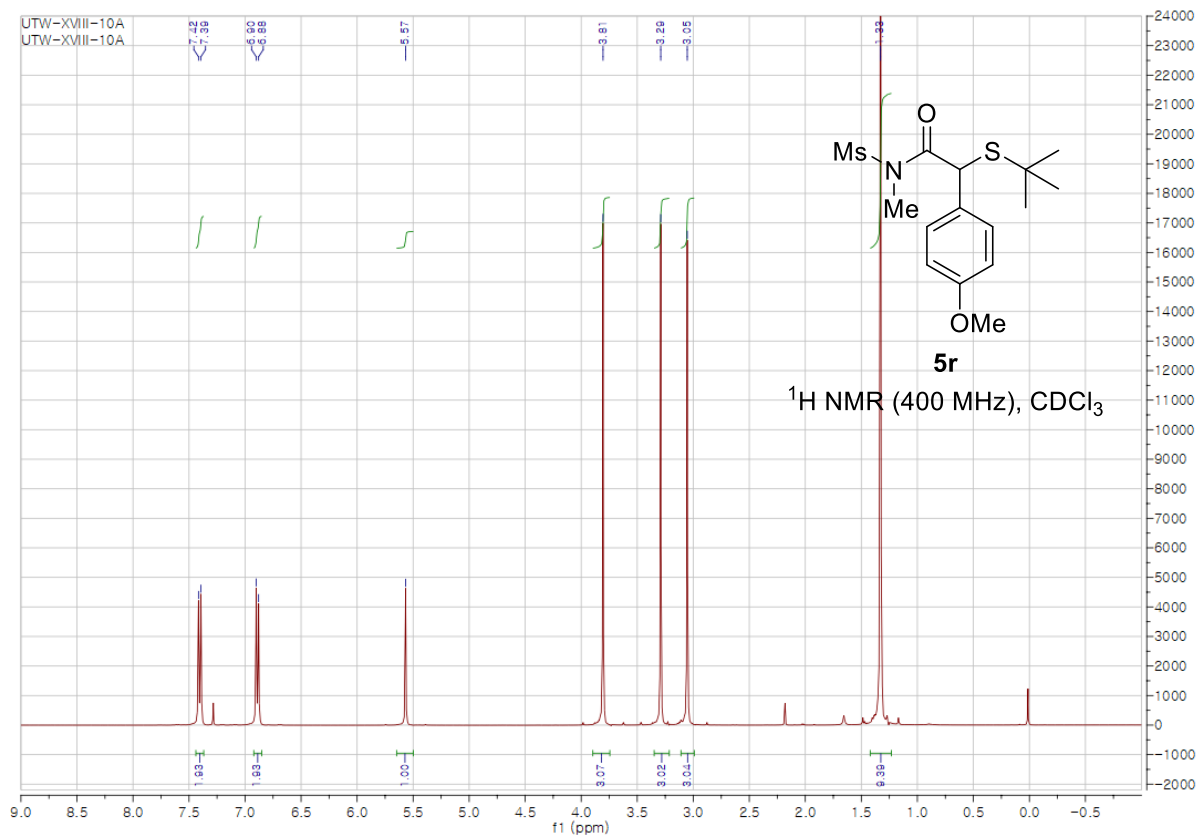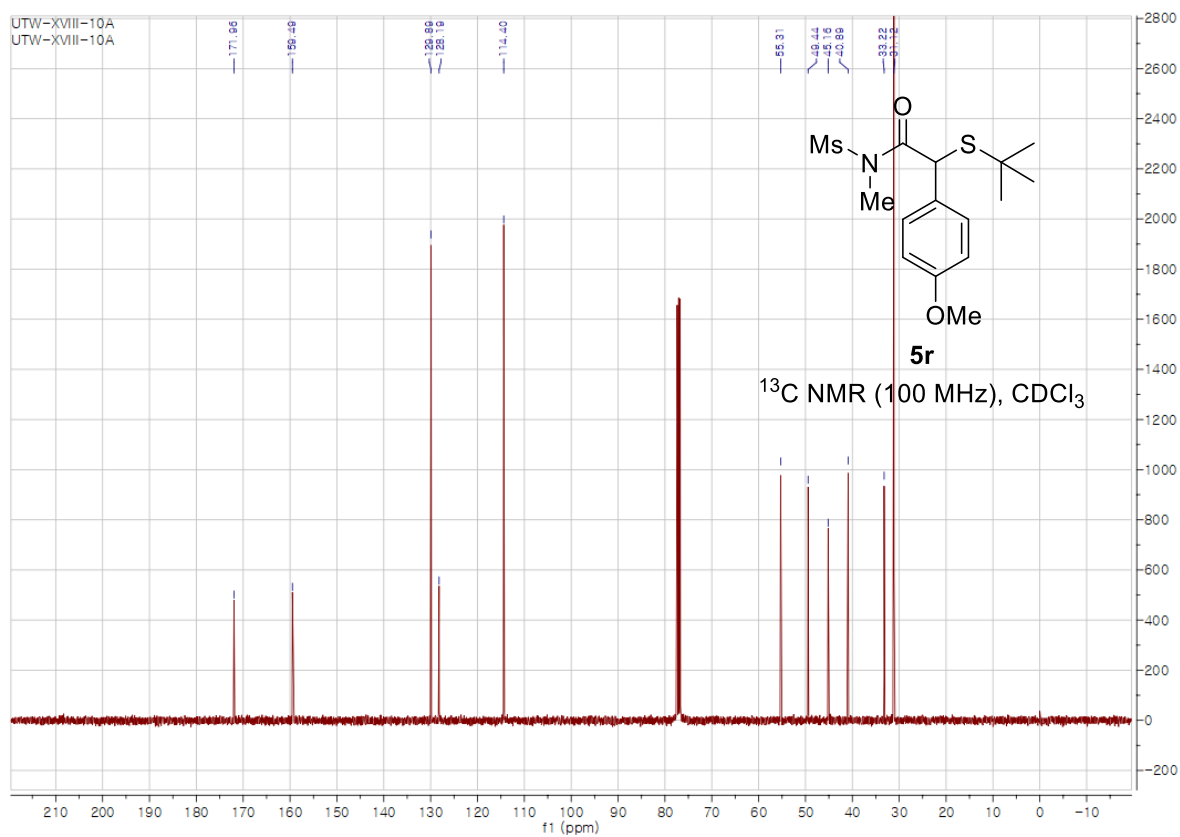

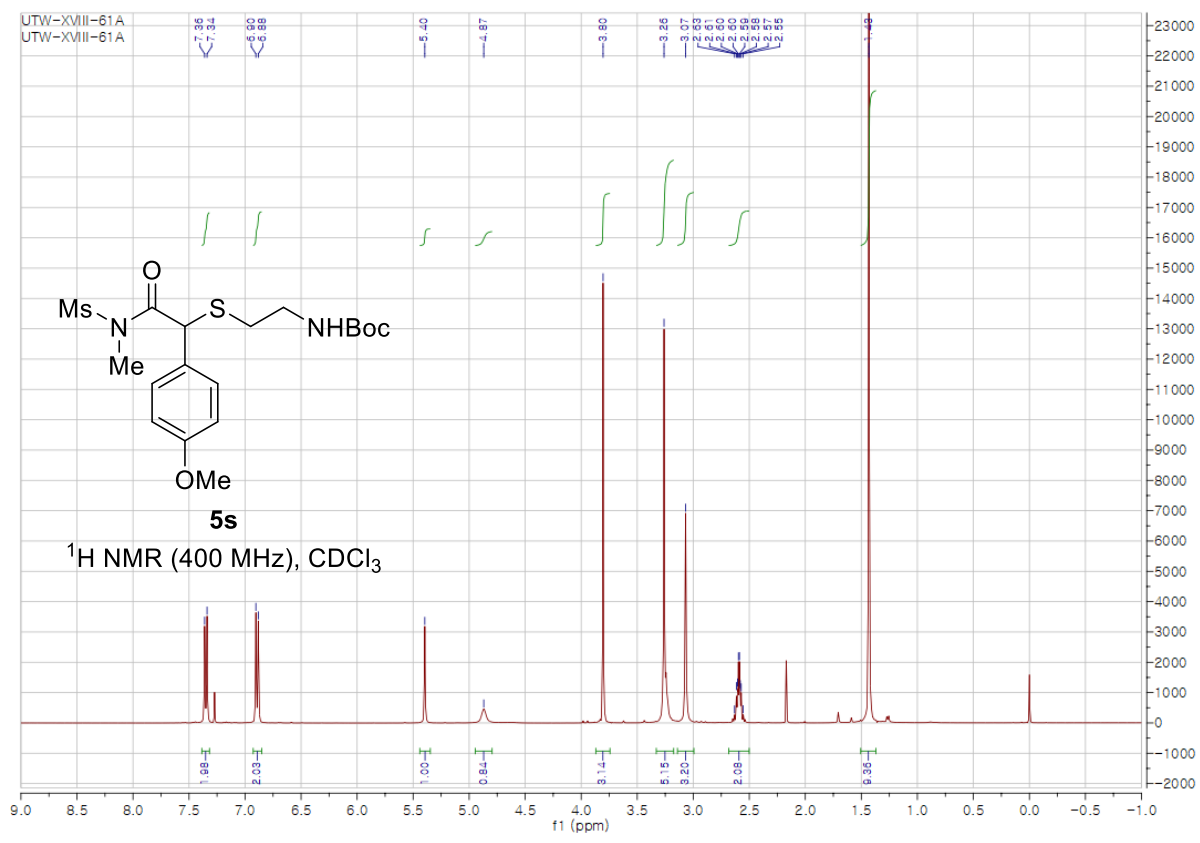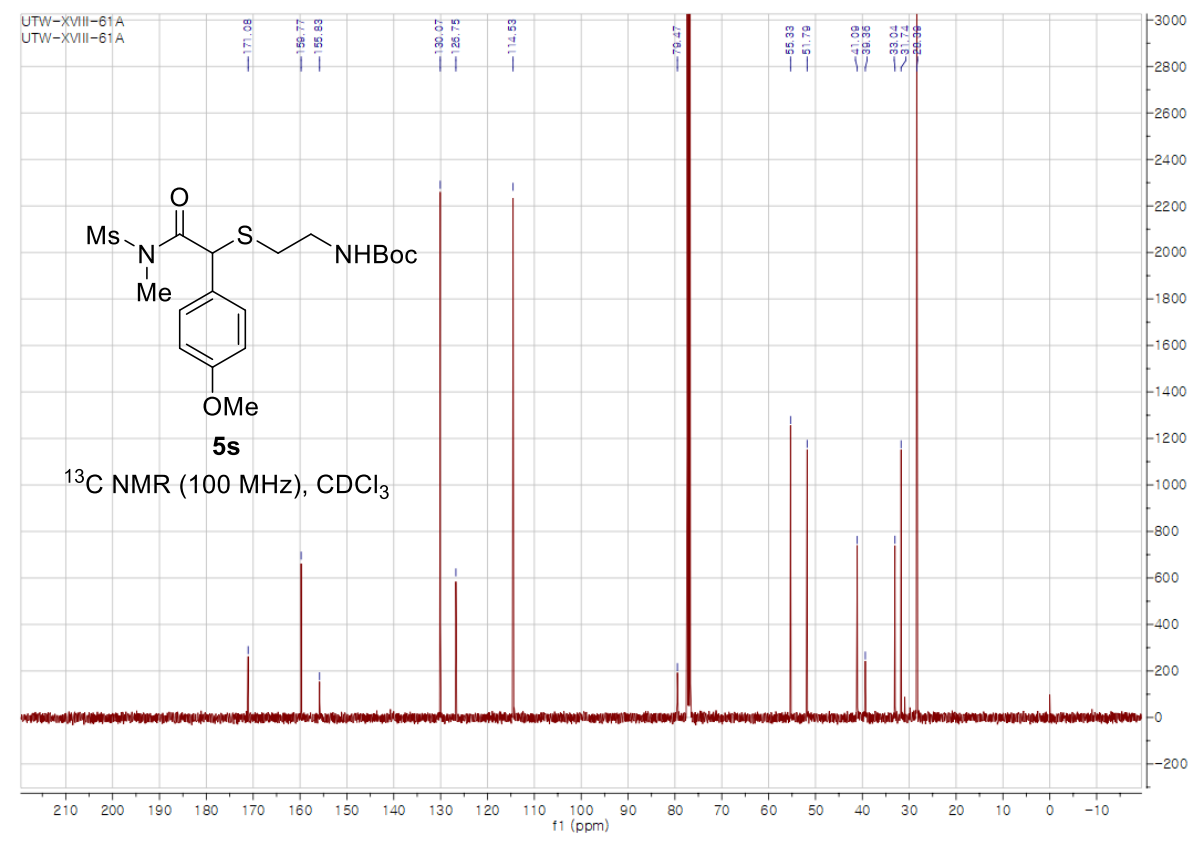

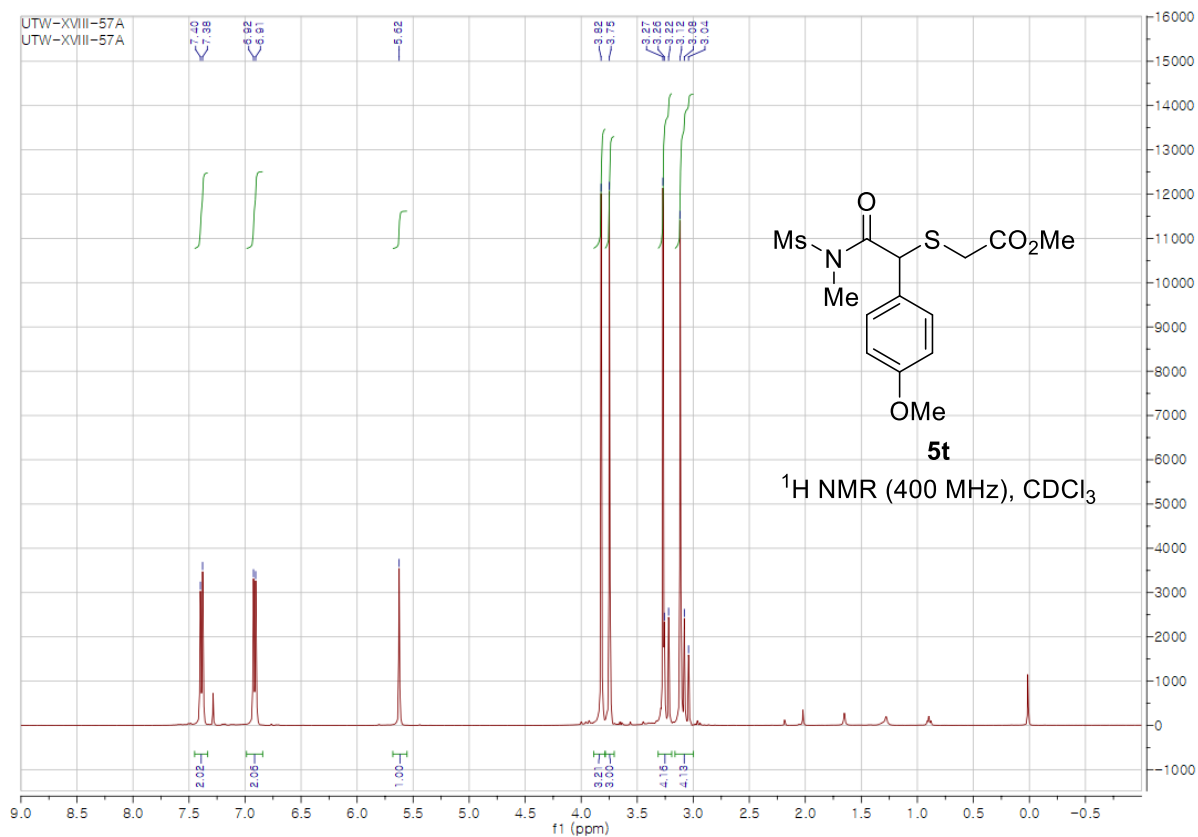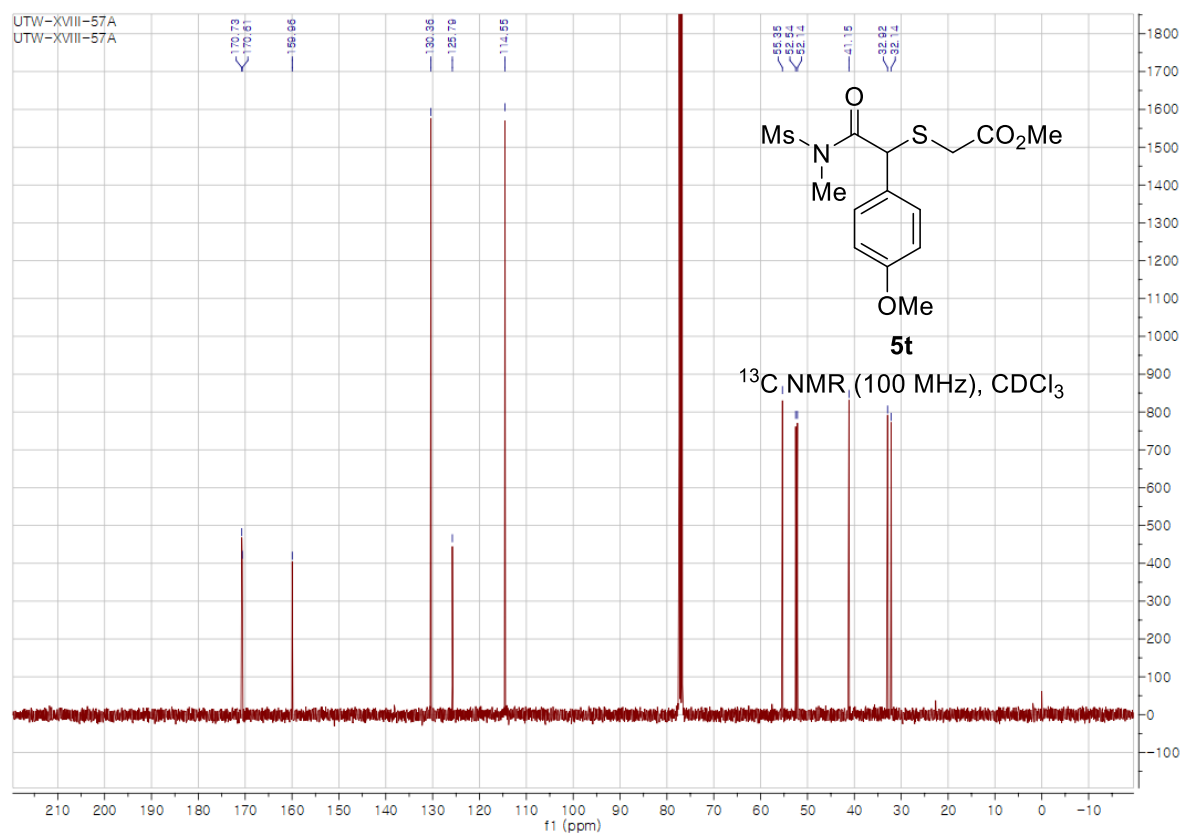

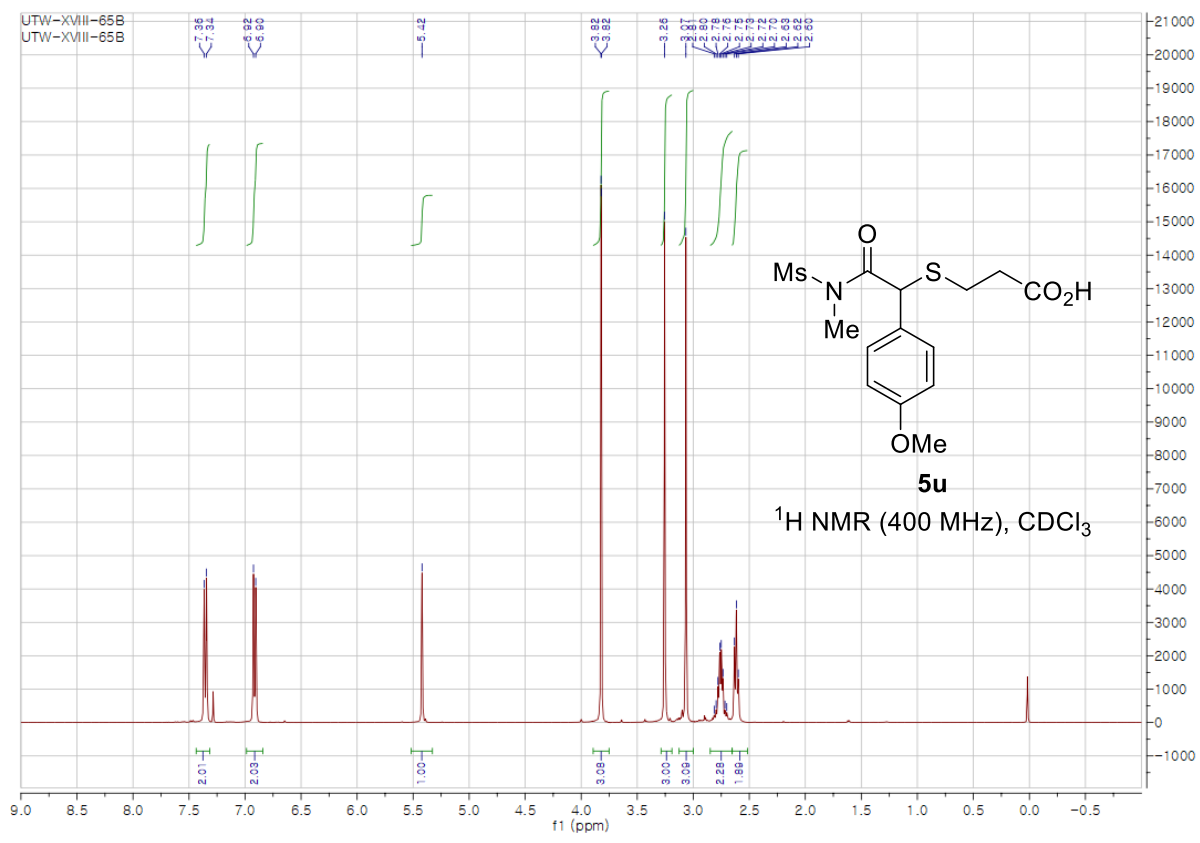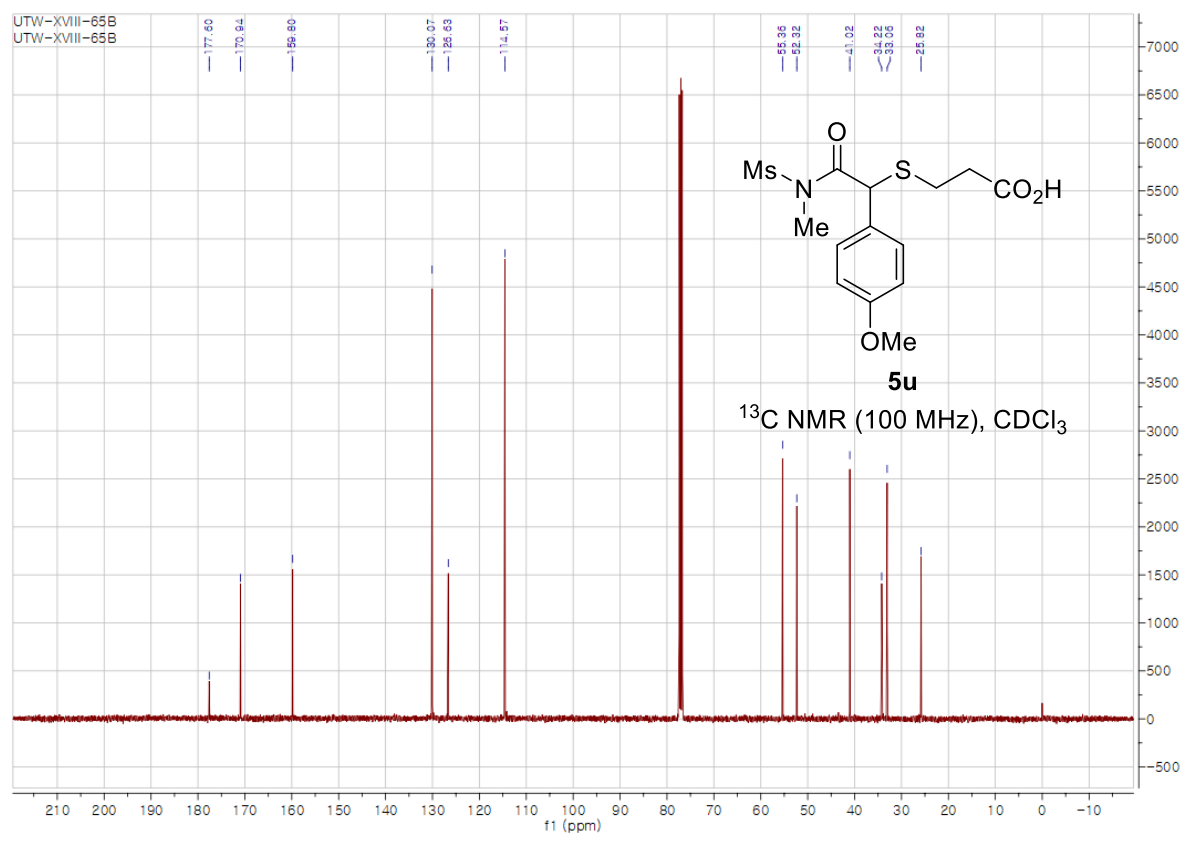

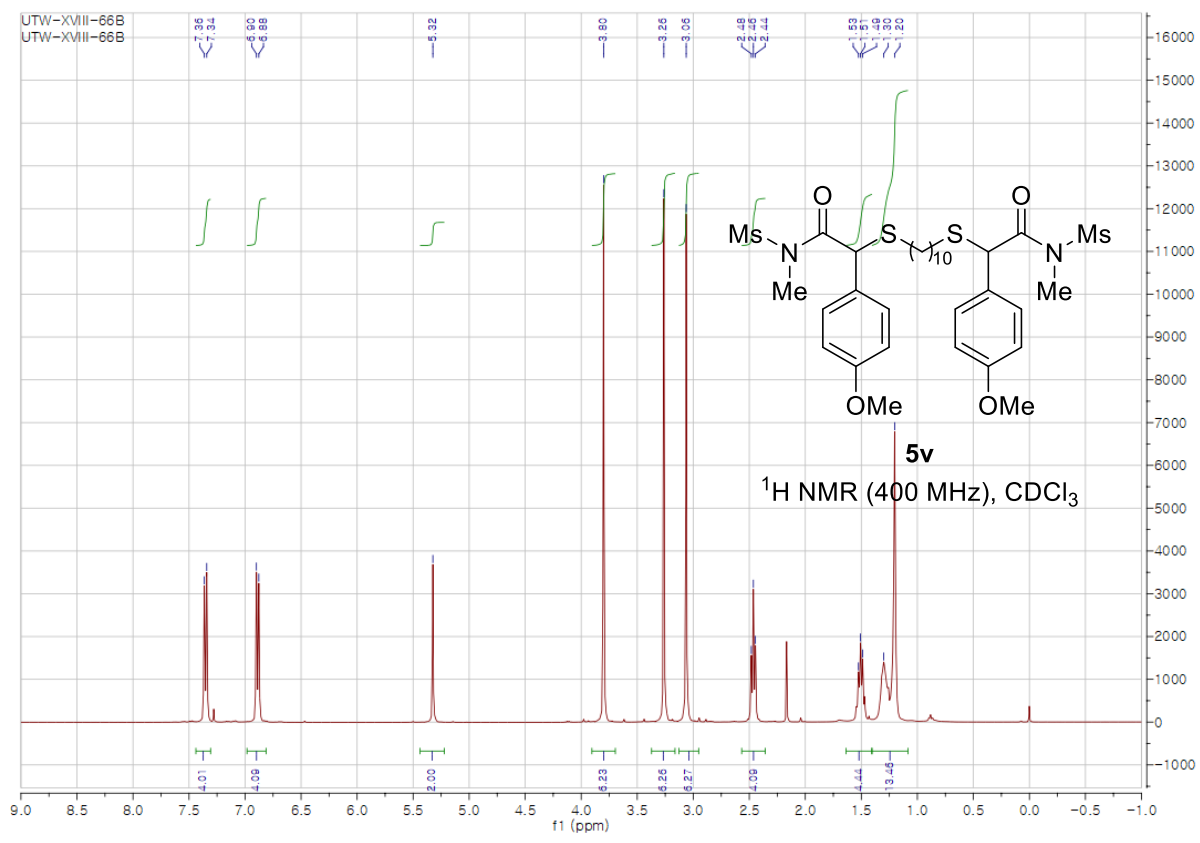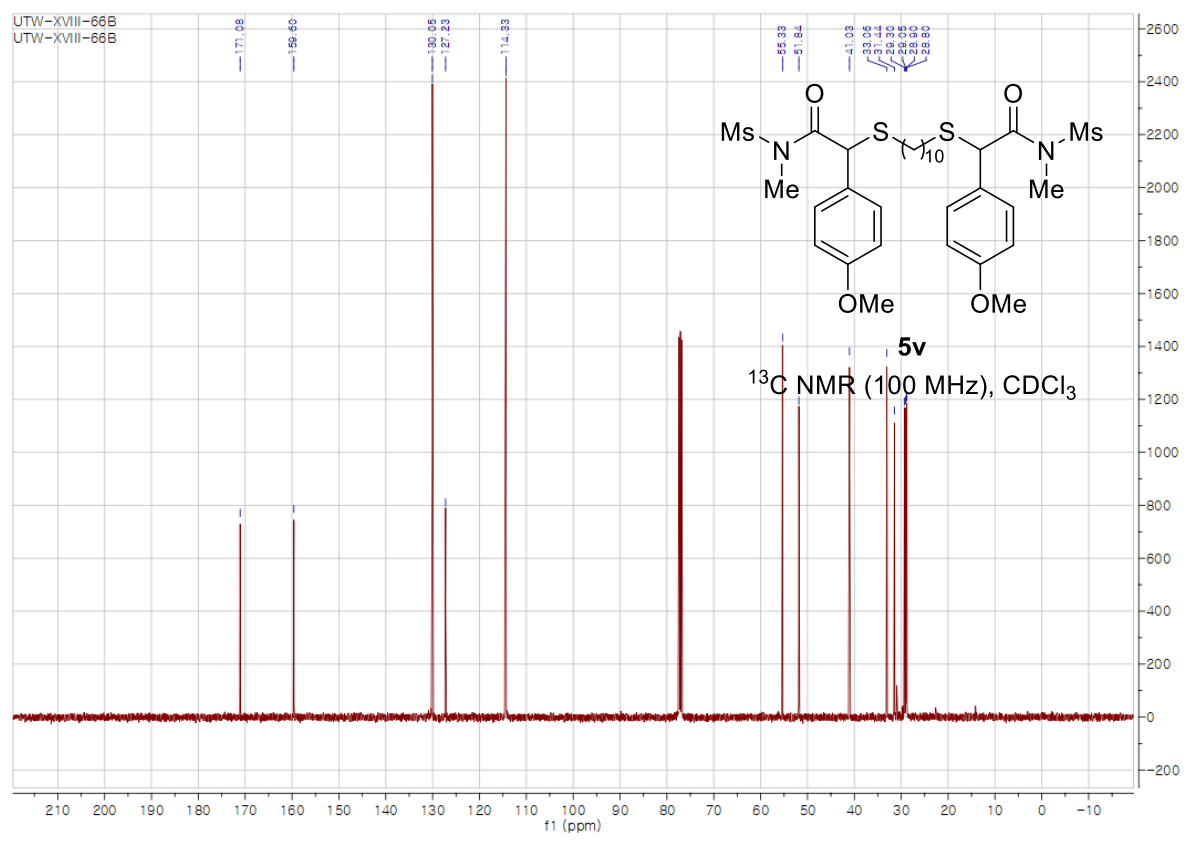





UTW-XVIII-93  
UTW-XVIII-93

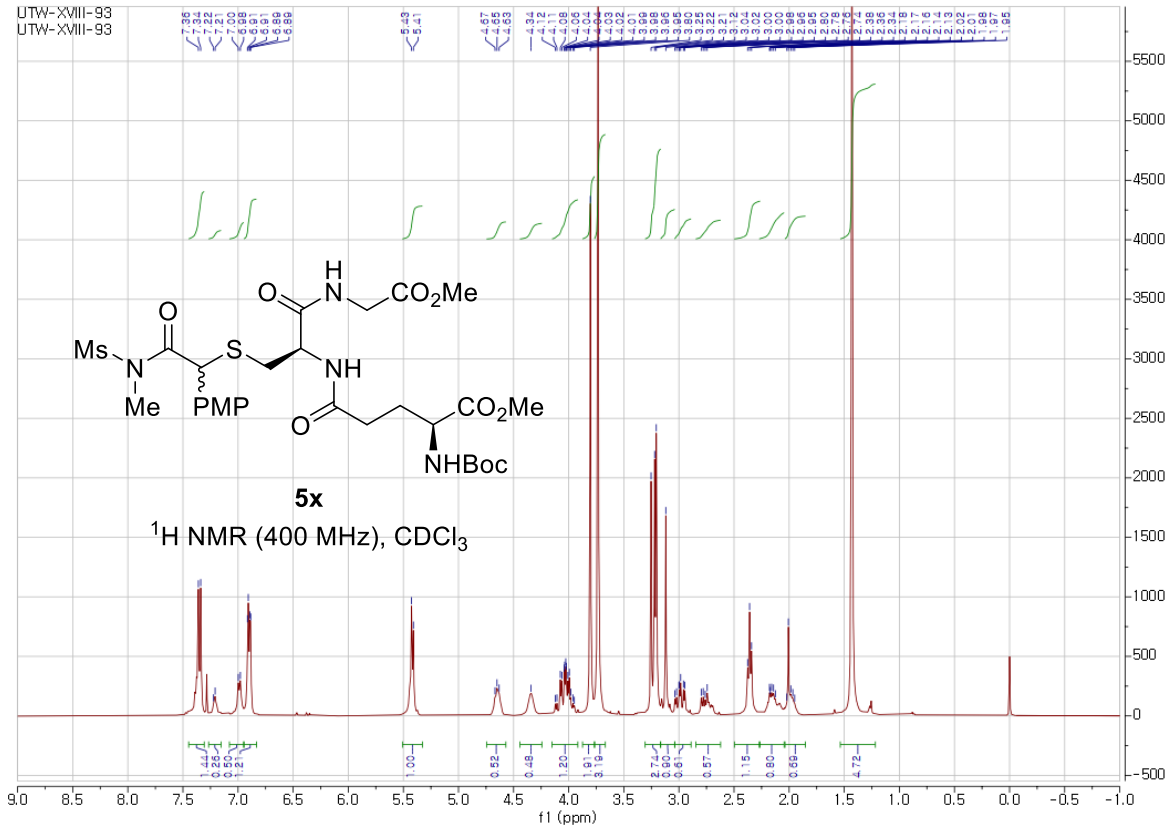

UTW-XVIII-93  
UTW-XVIII-93

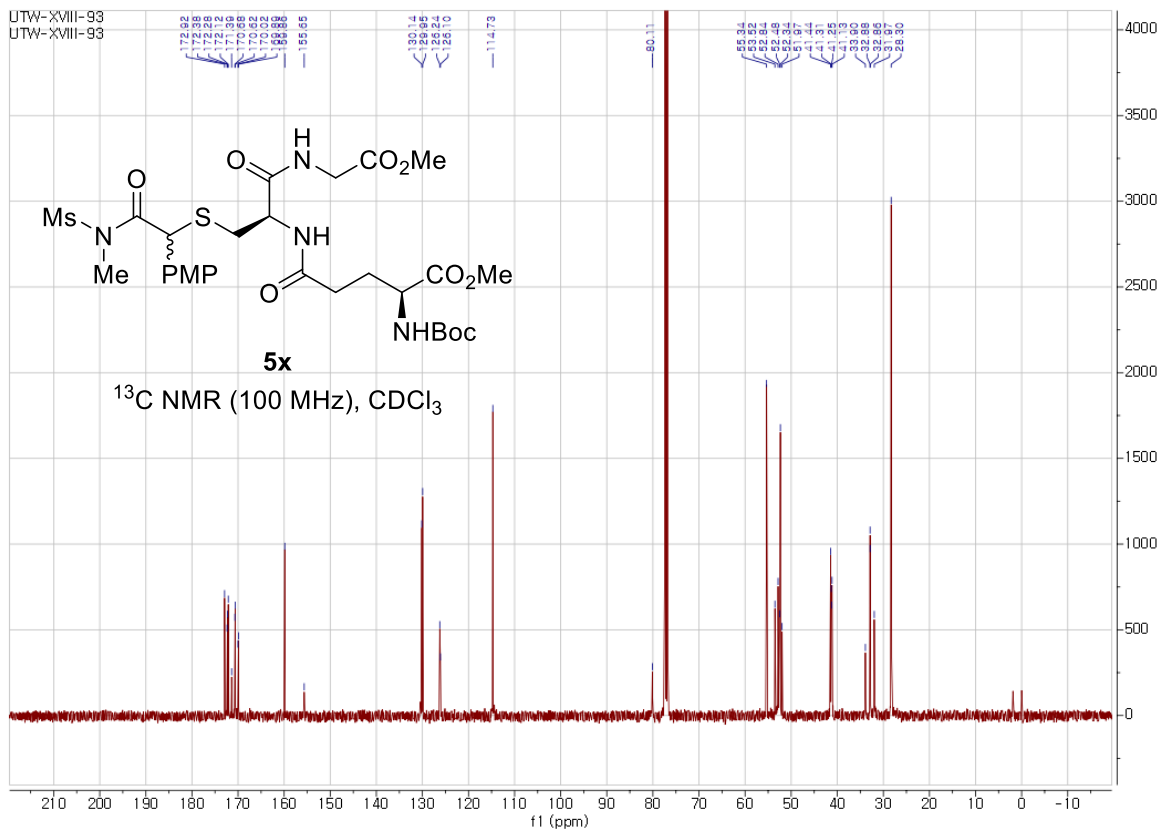

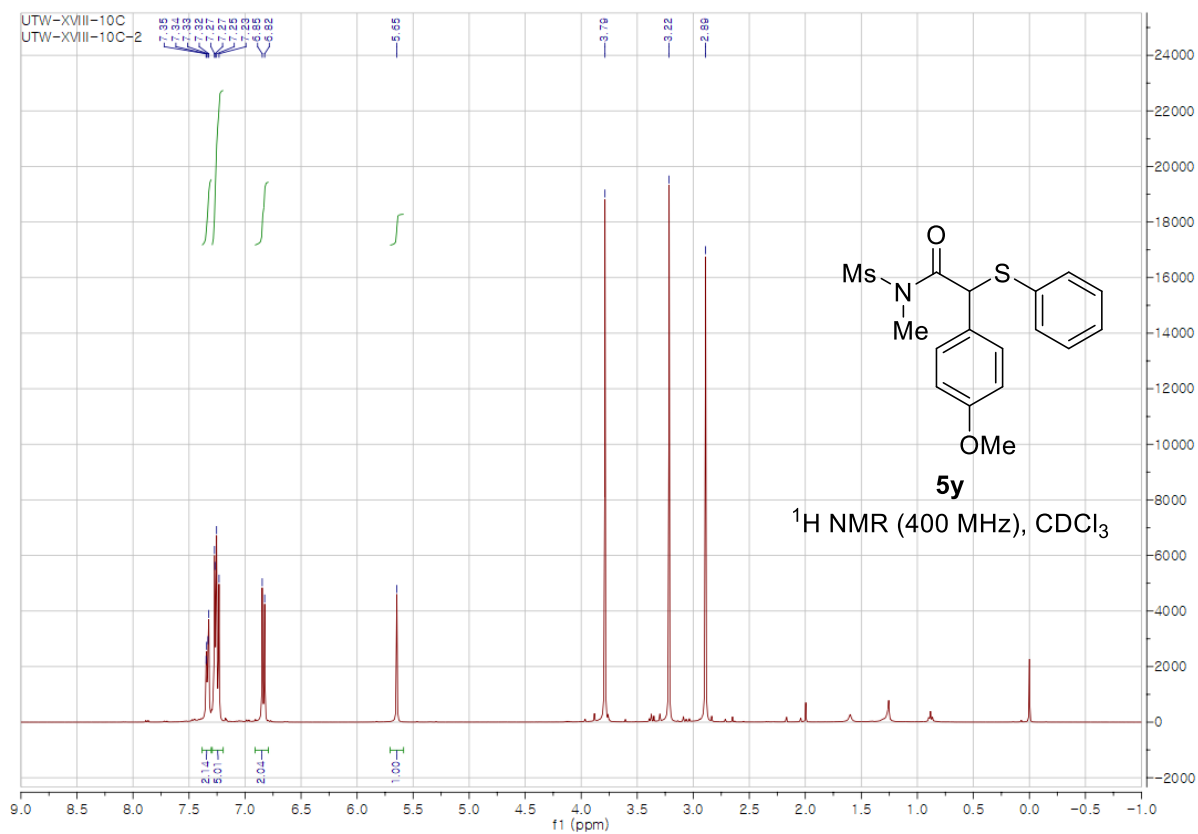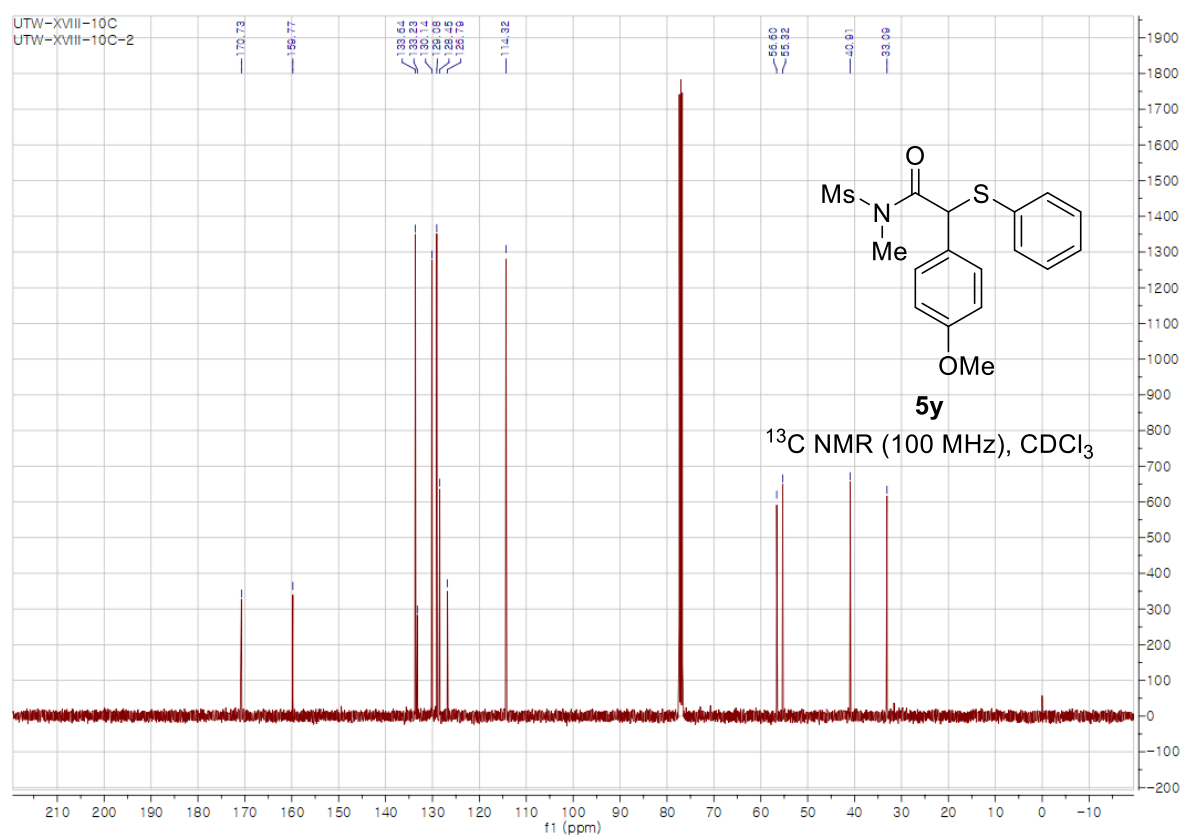

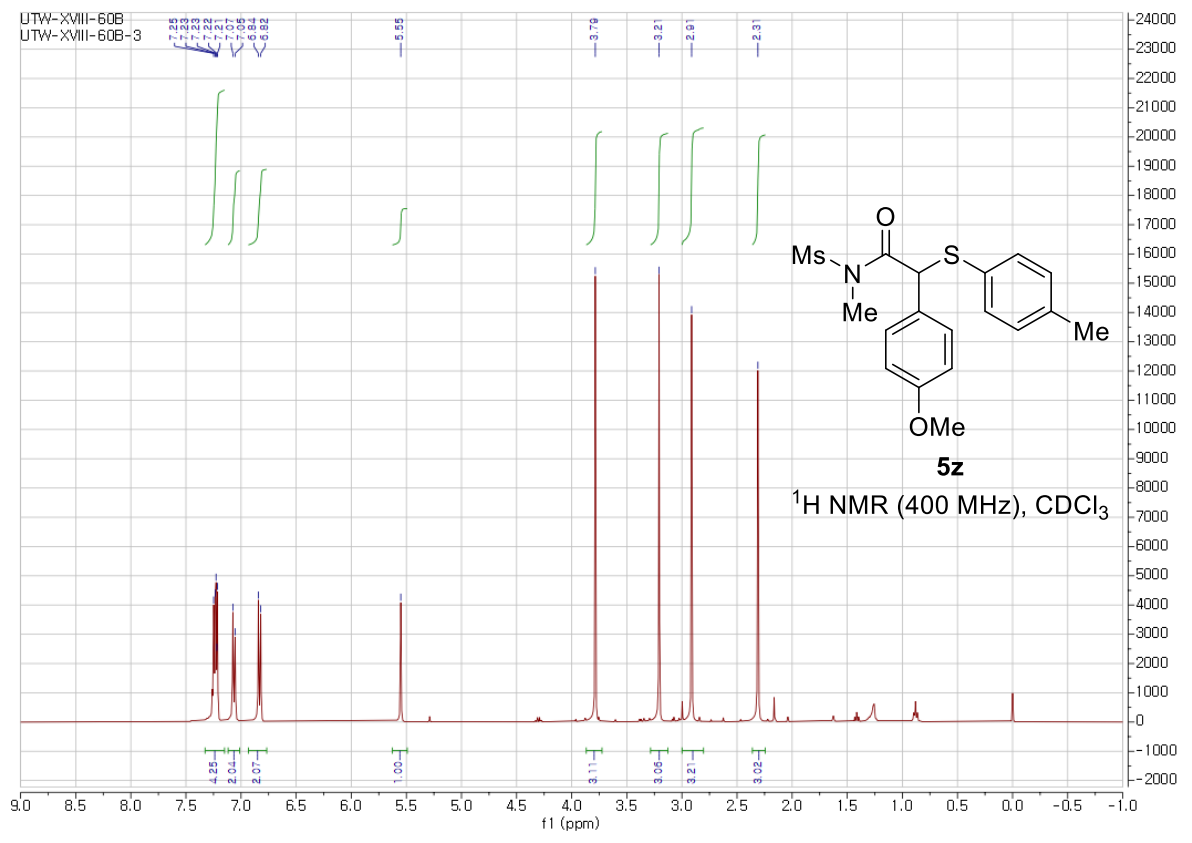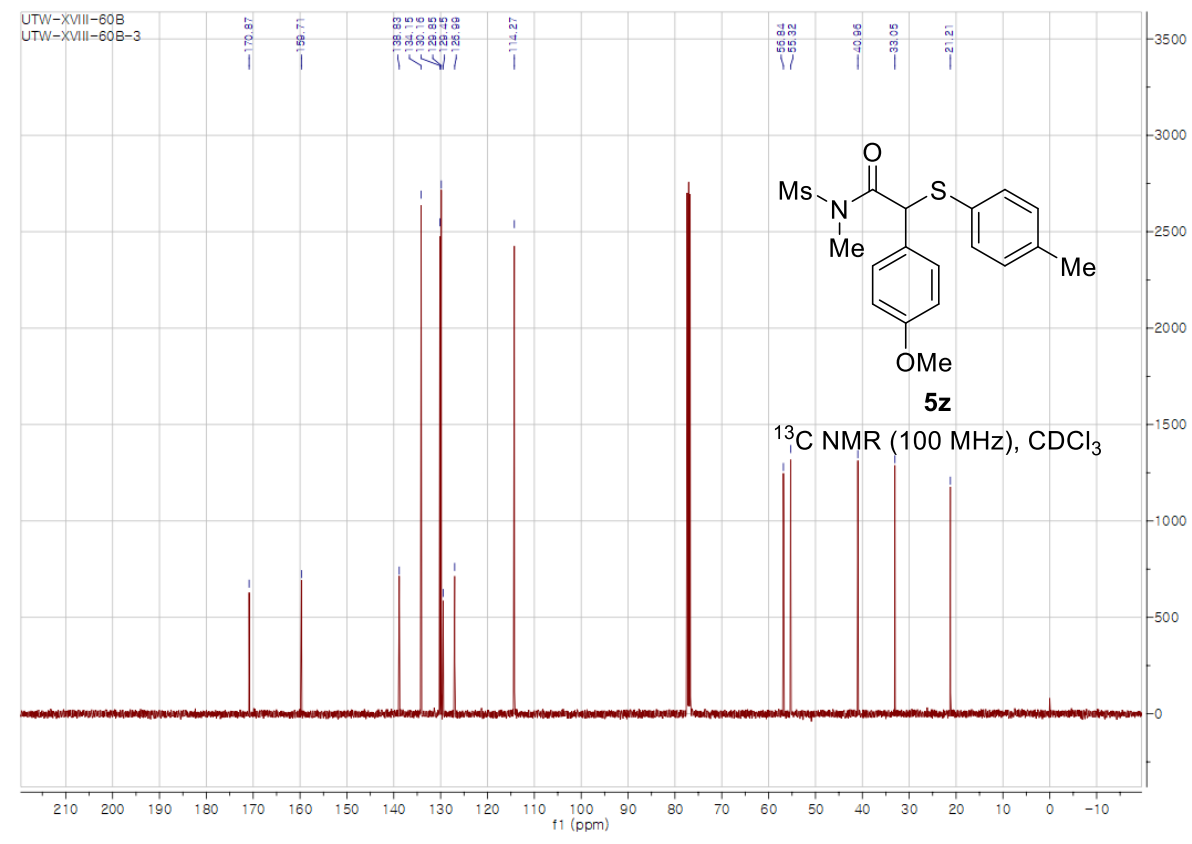

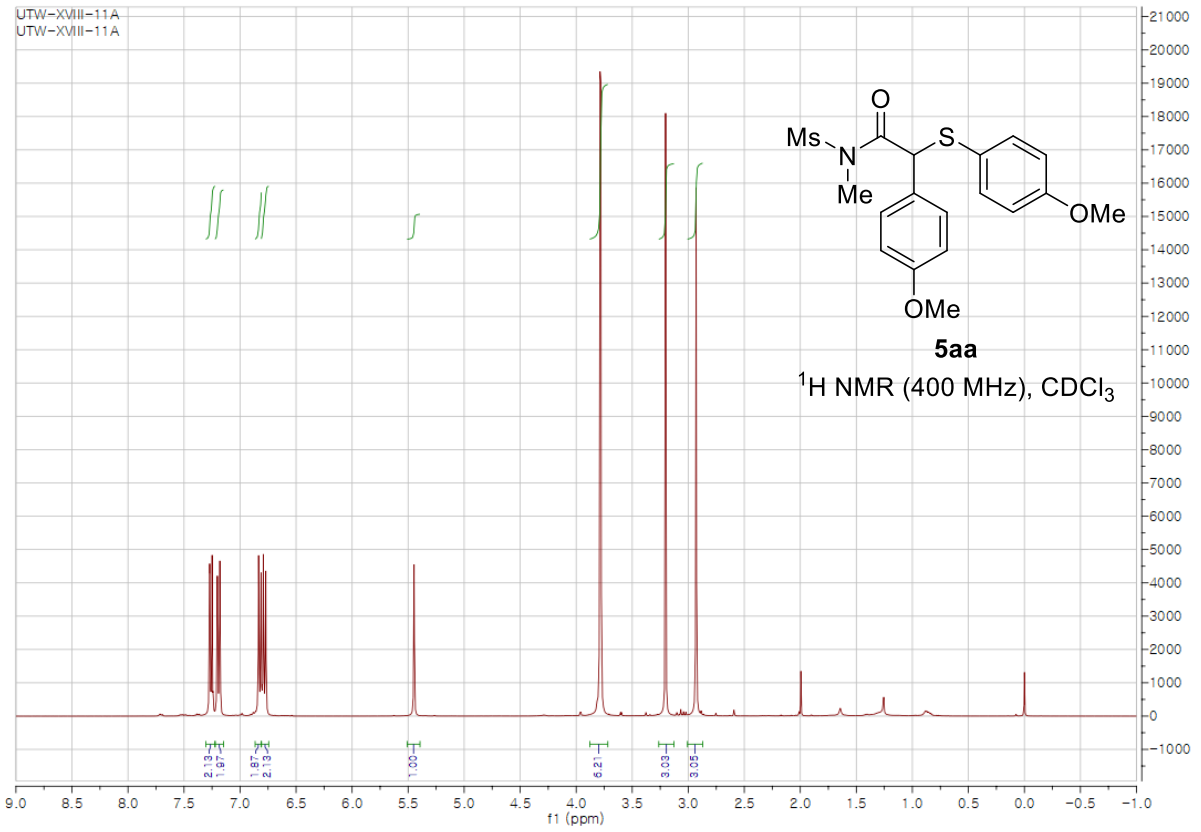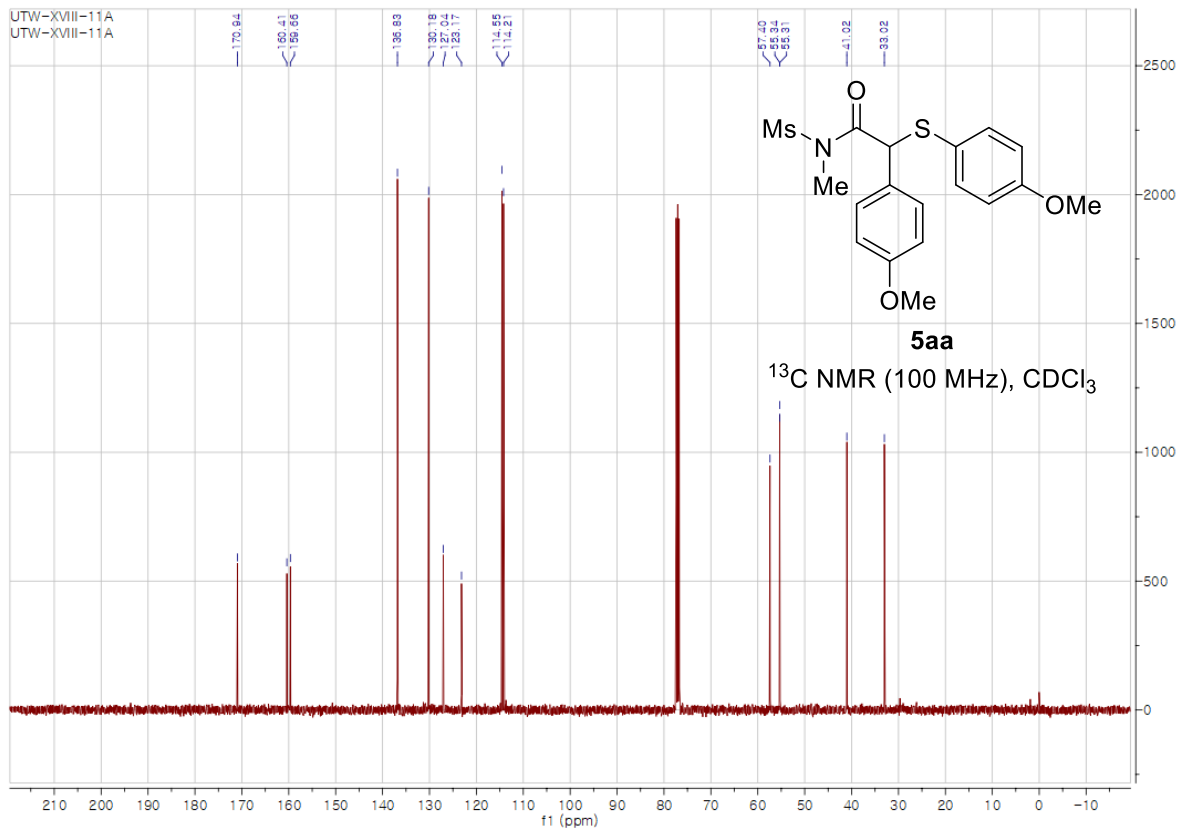

UTW-XVIII-72B  
UTW-XVIII-72B

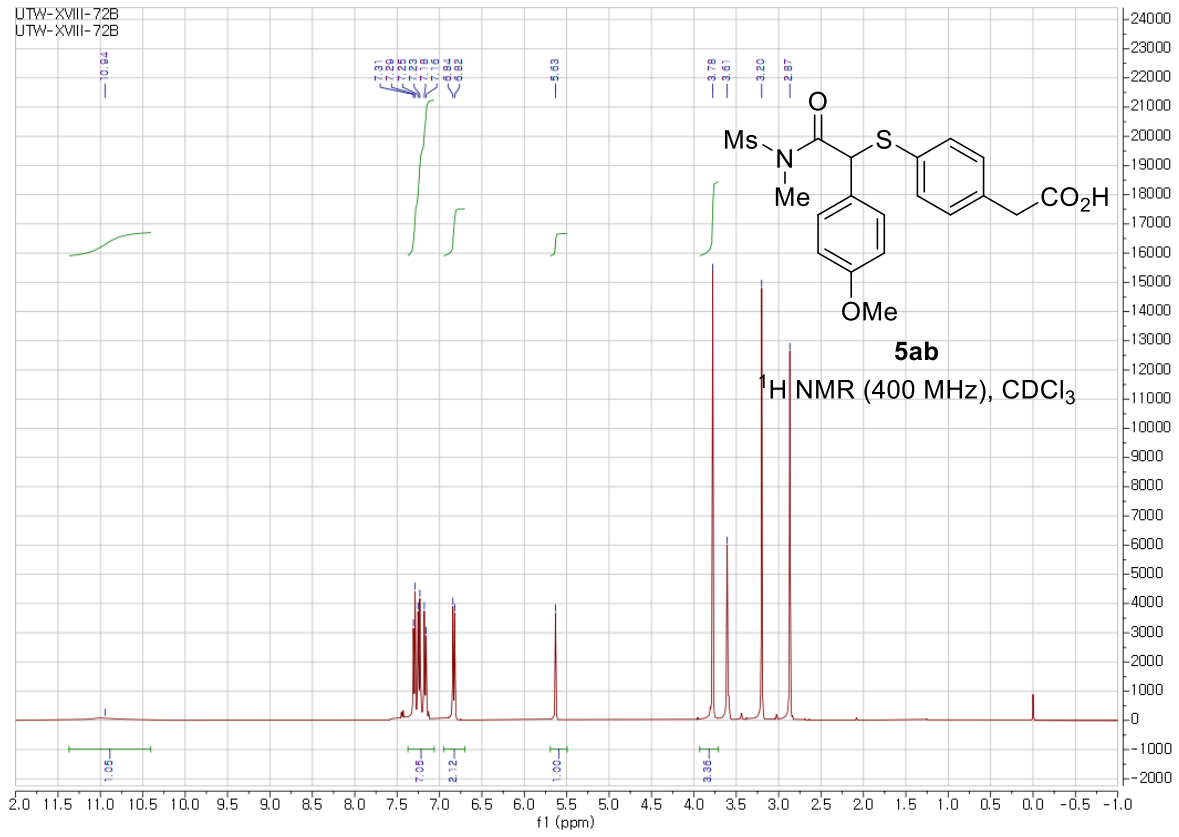

UTW-XVIII-72B  
UTW-XVIII-72B

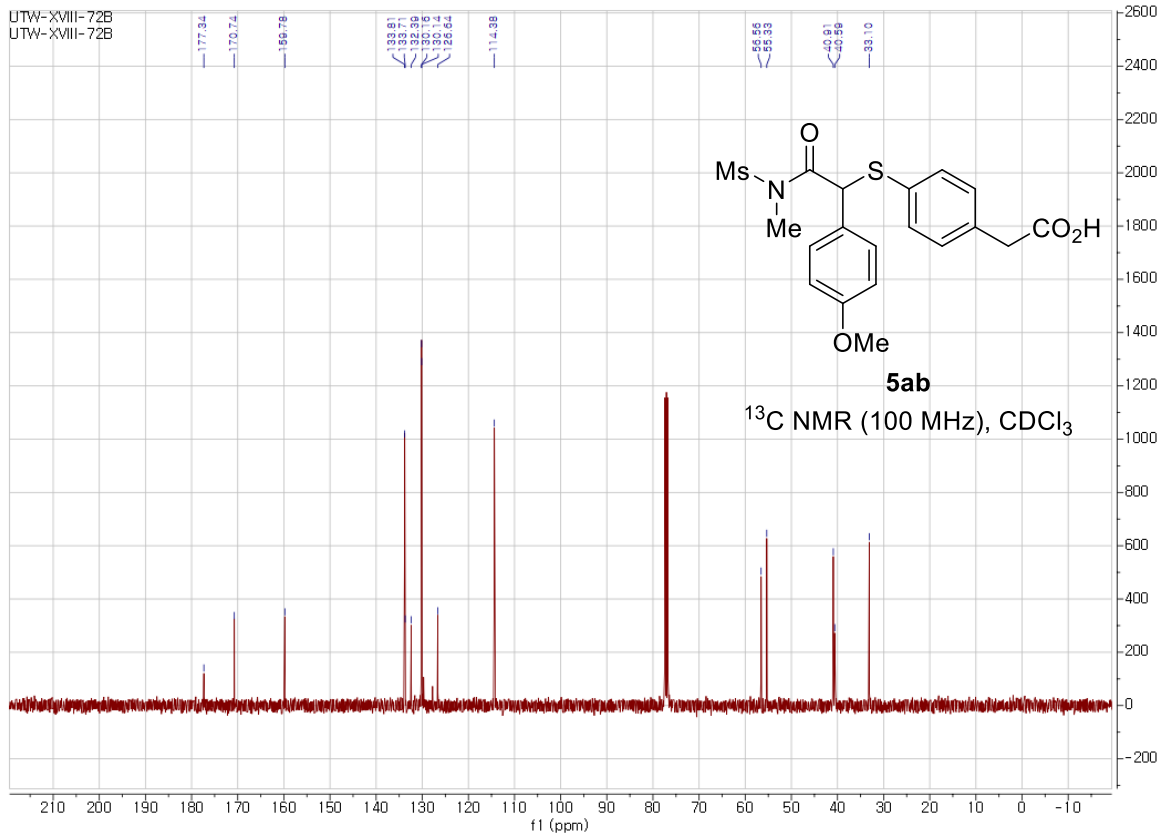

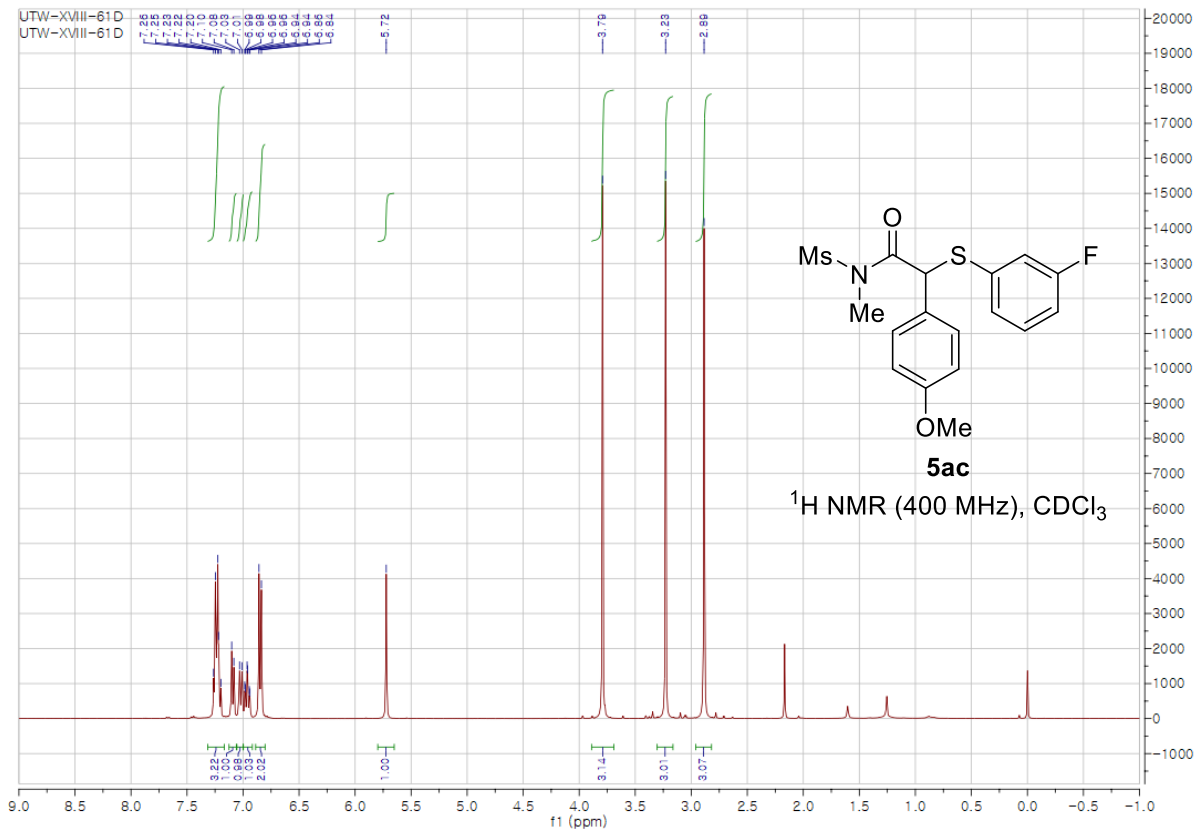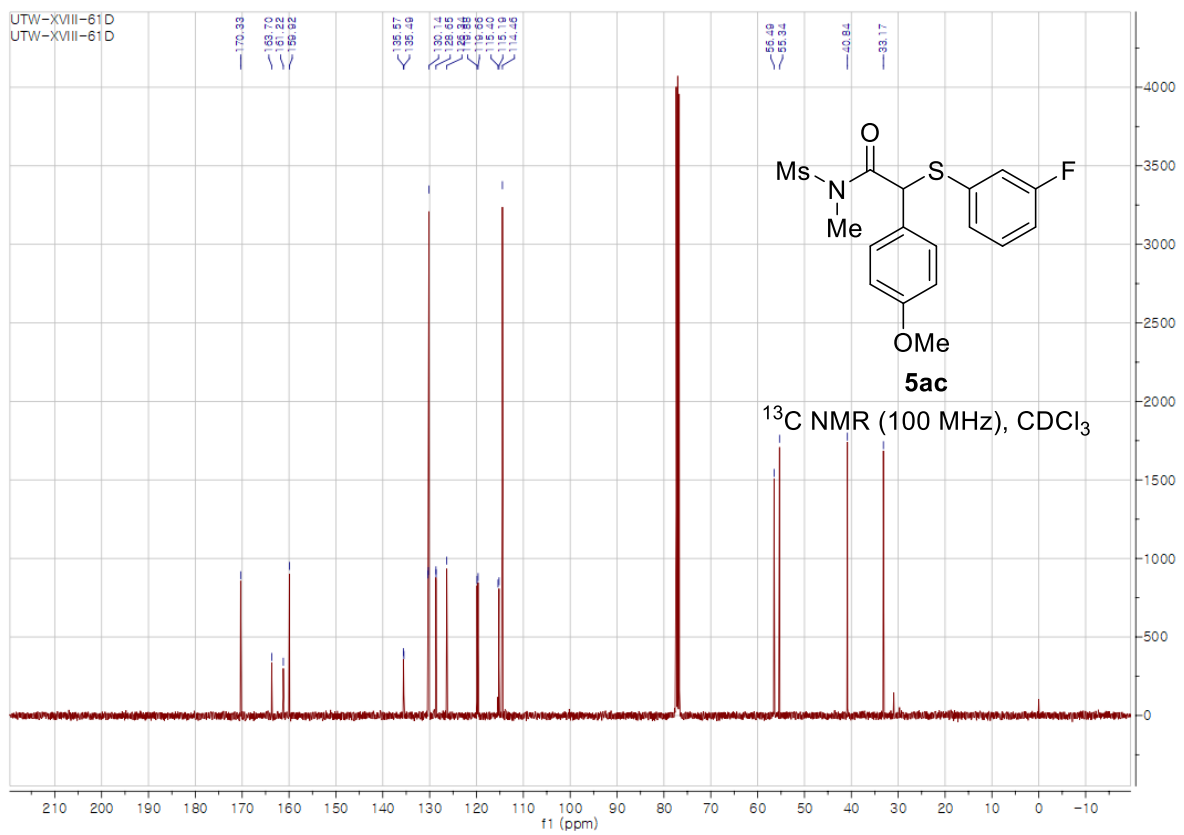

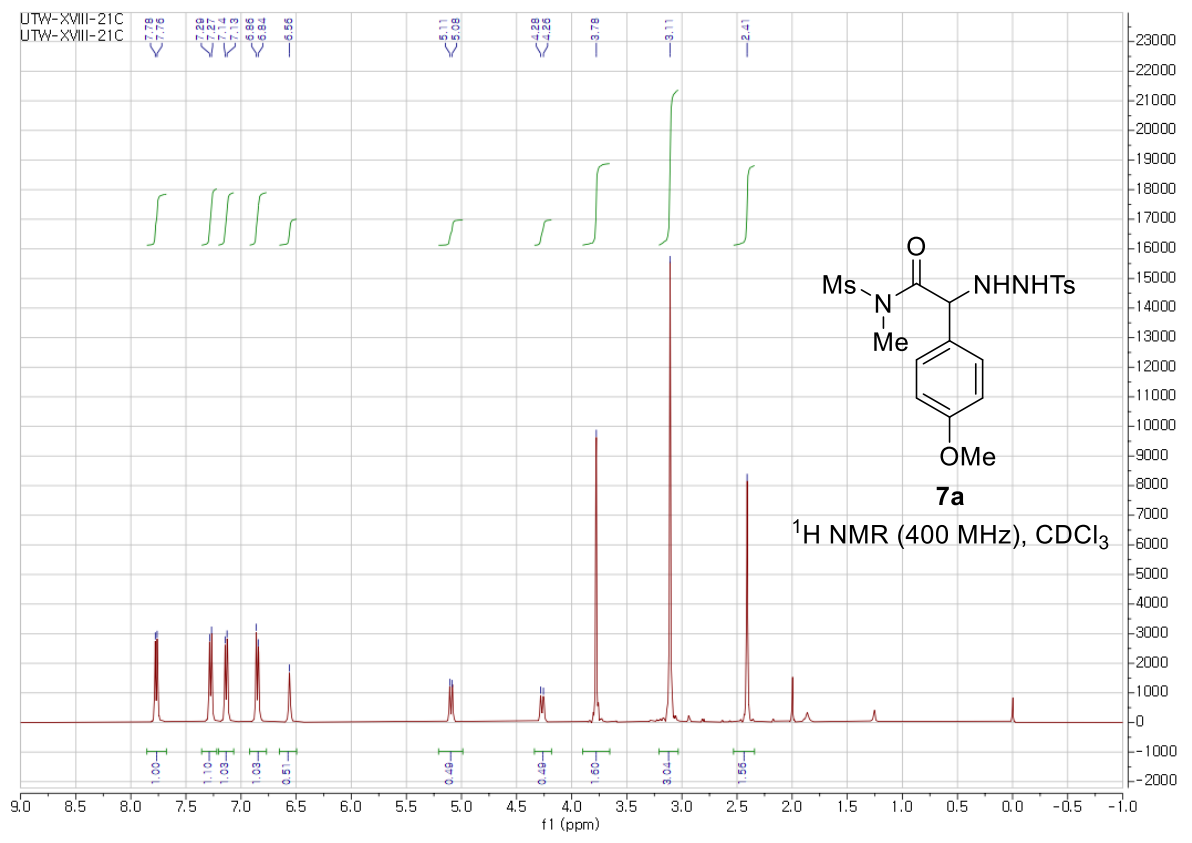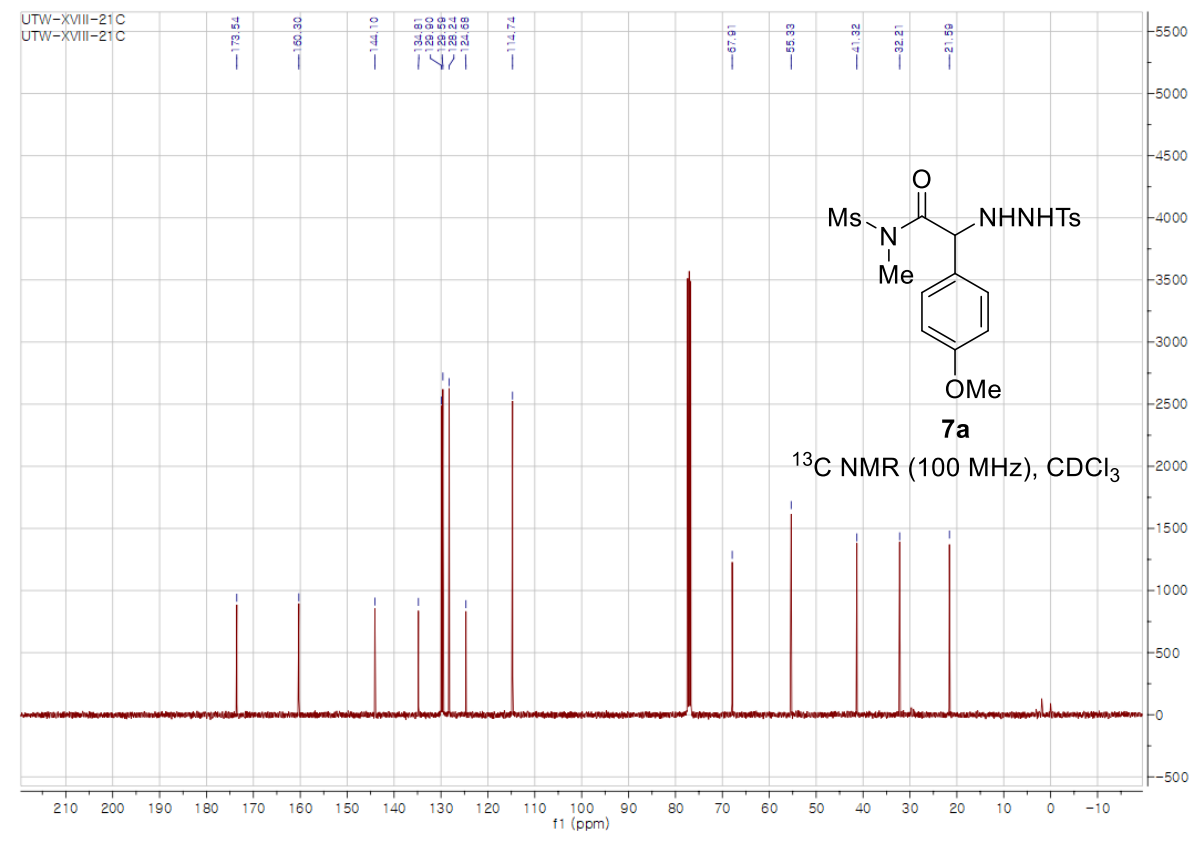



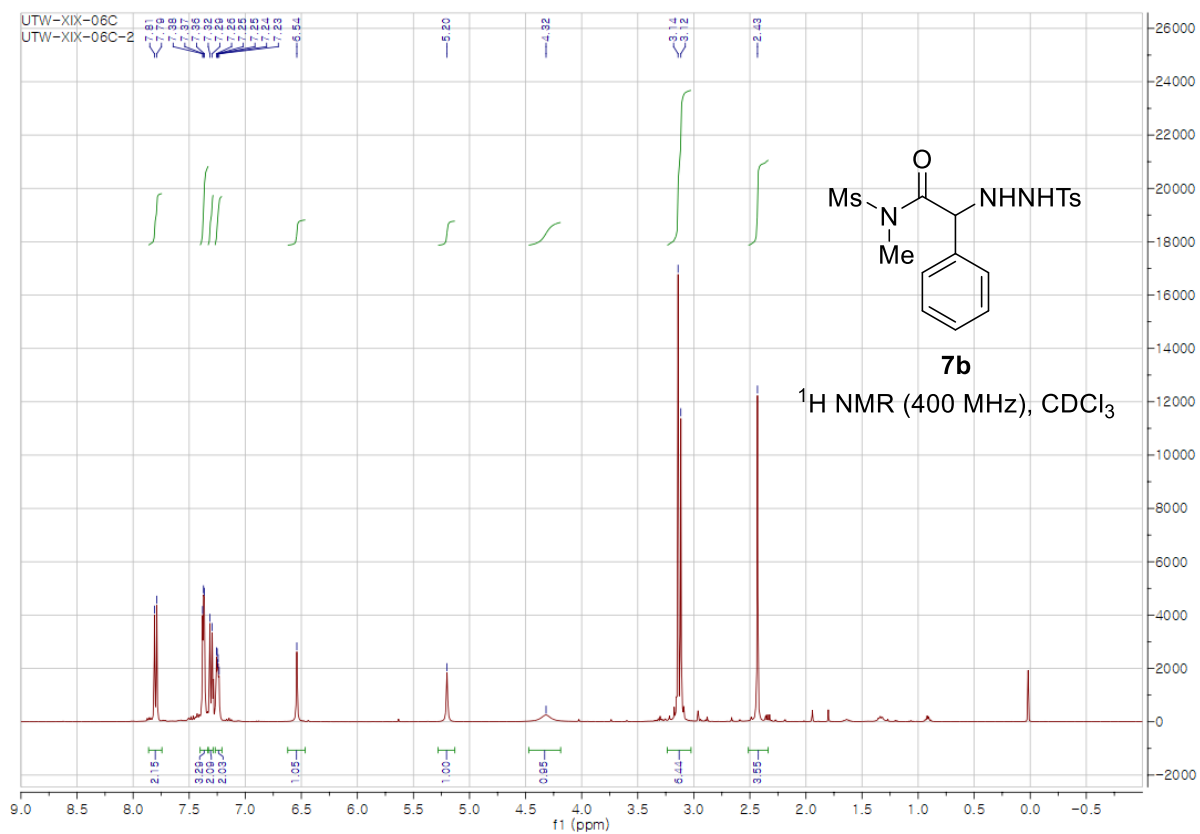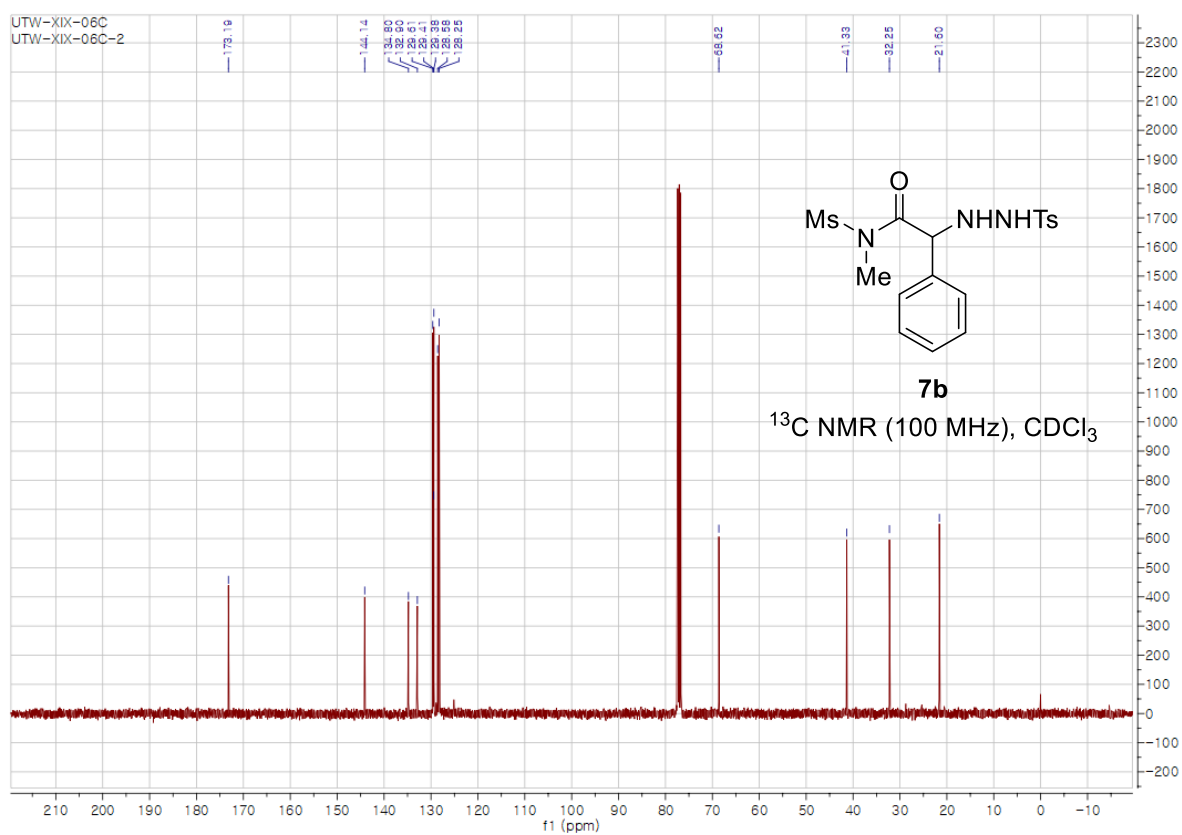

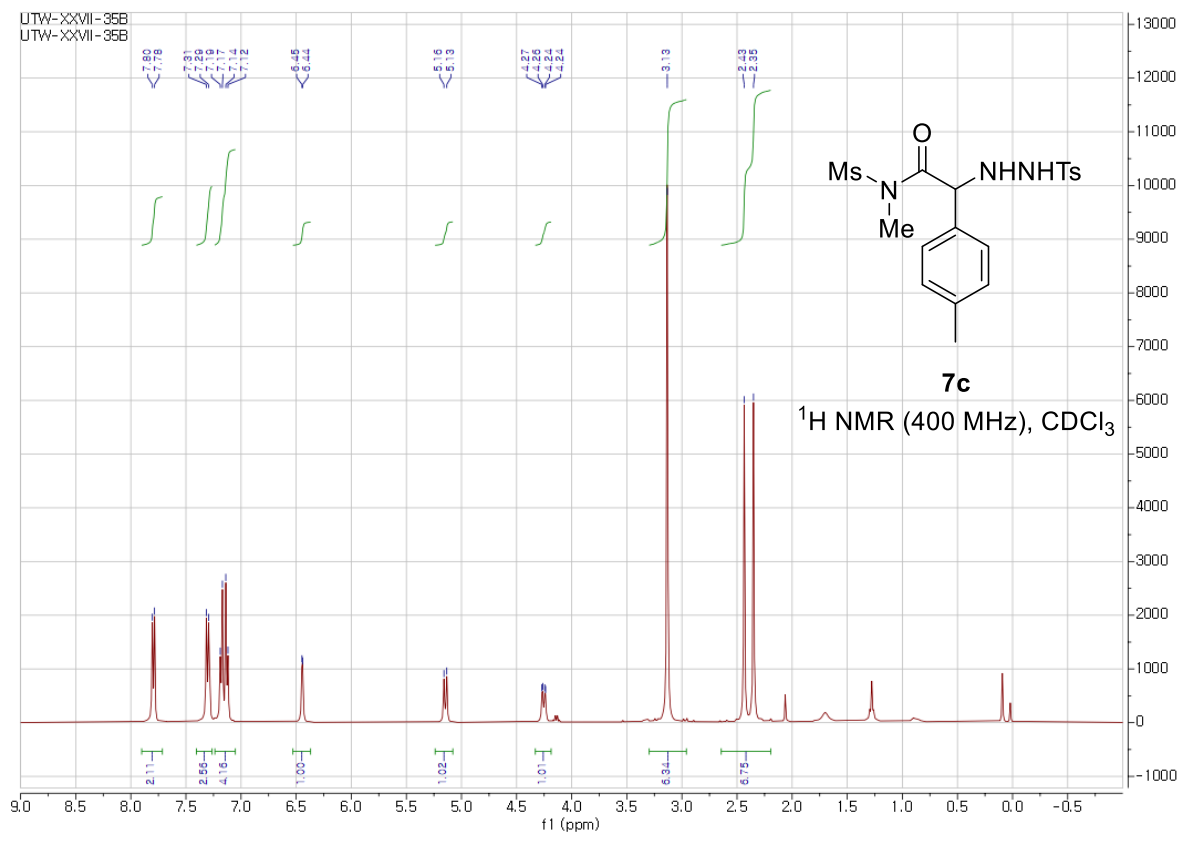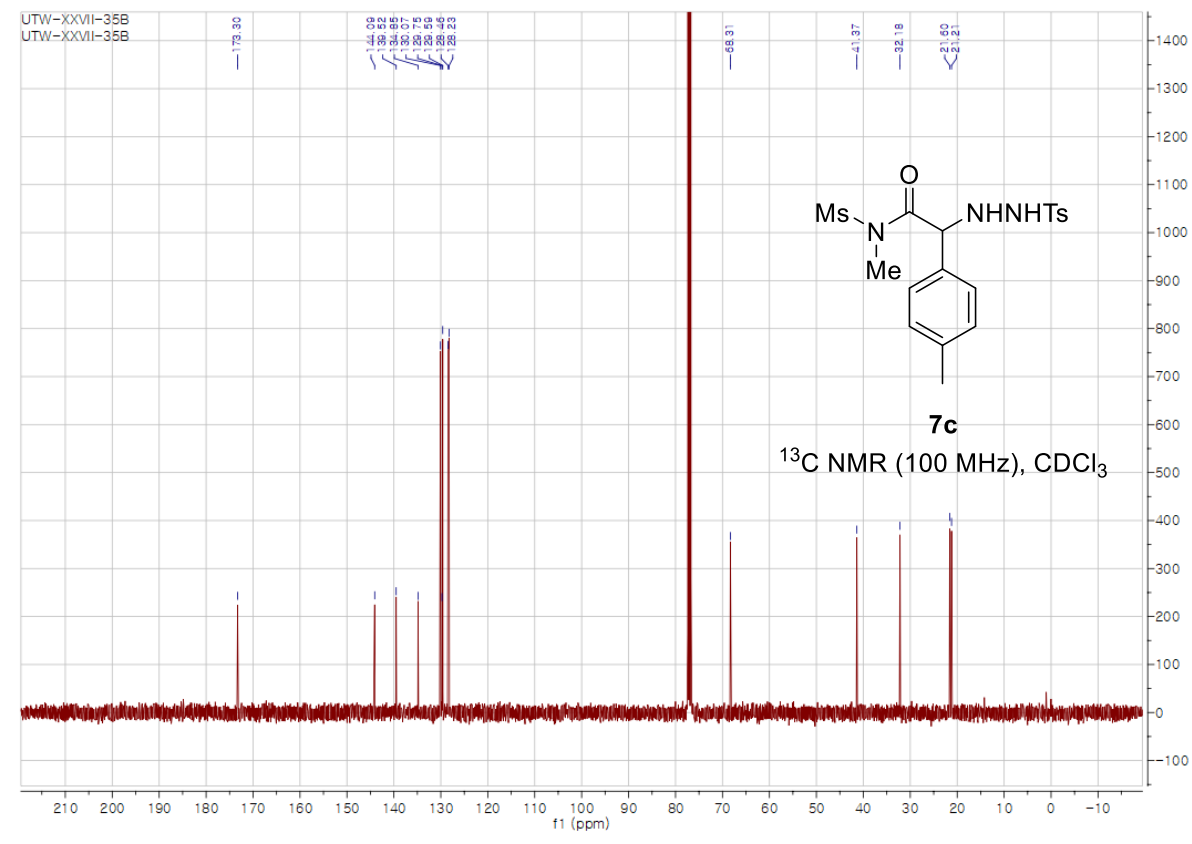

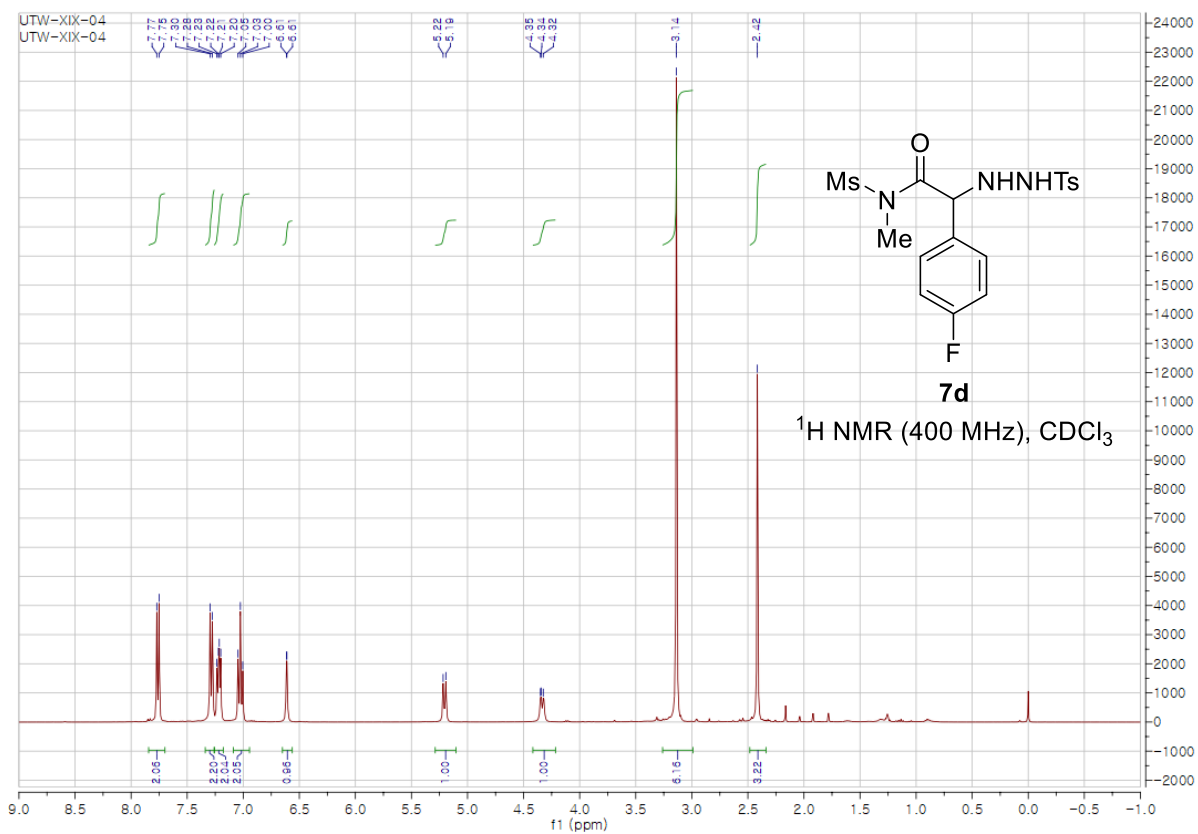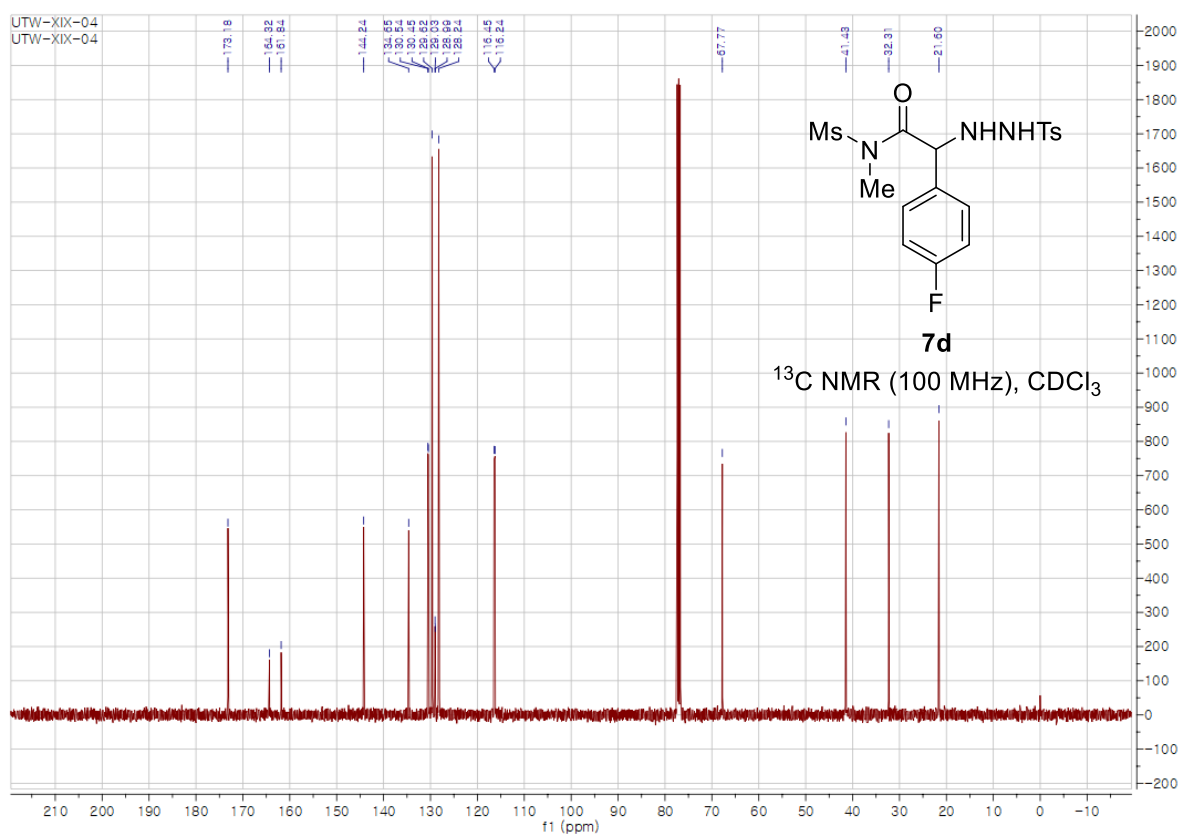

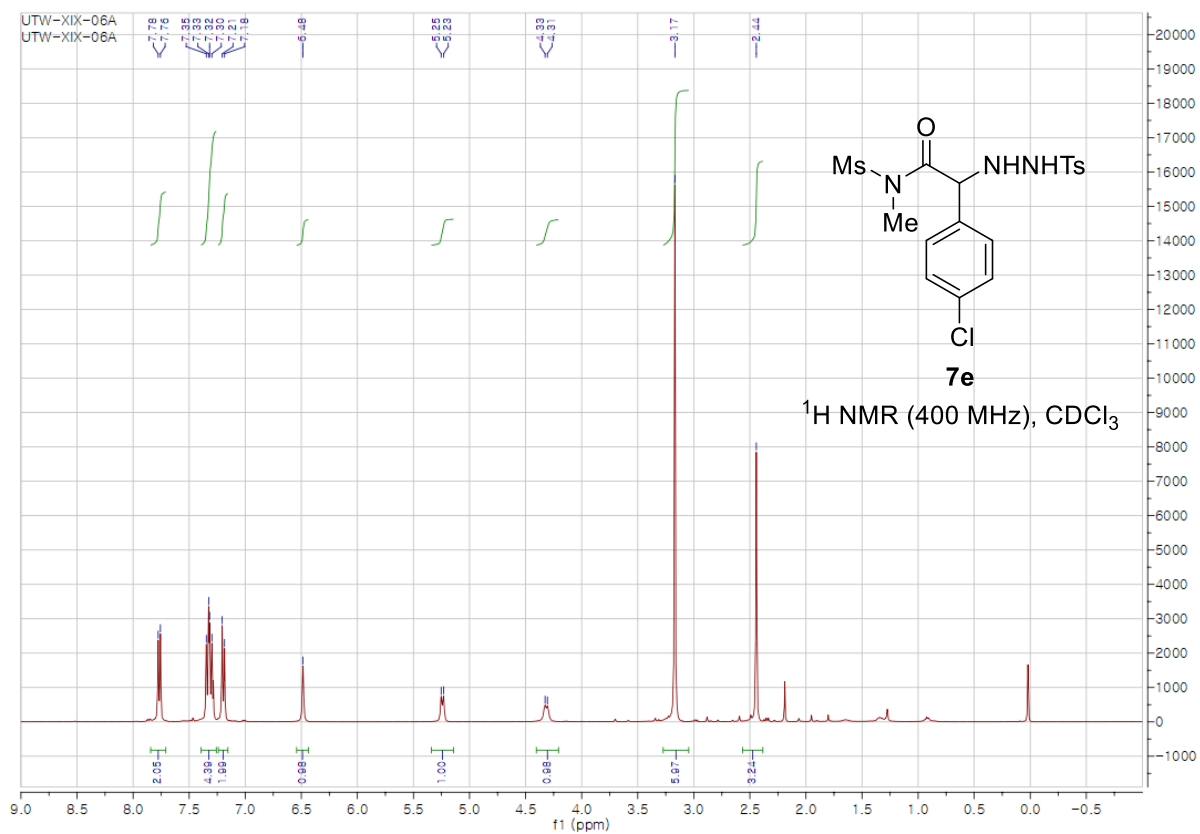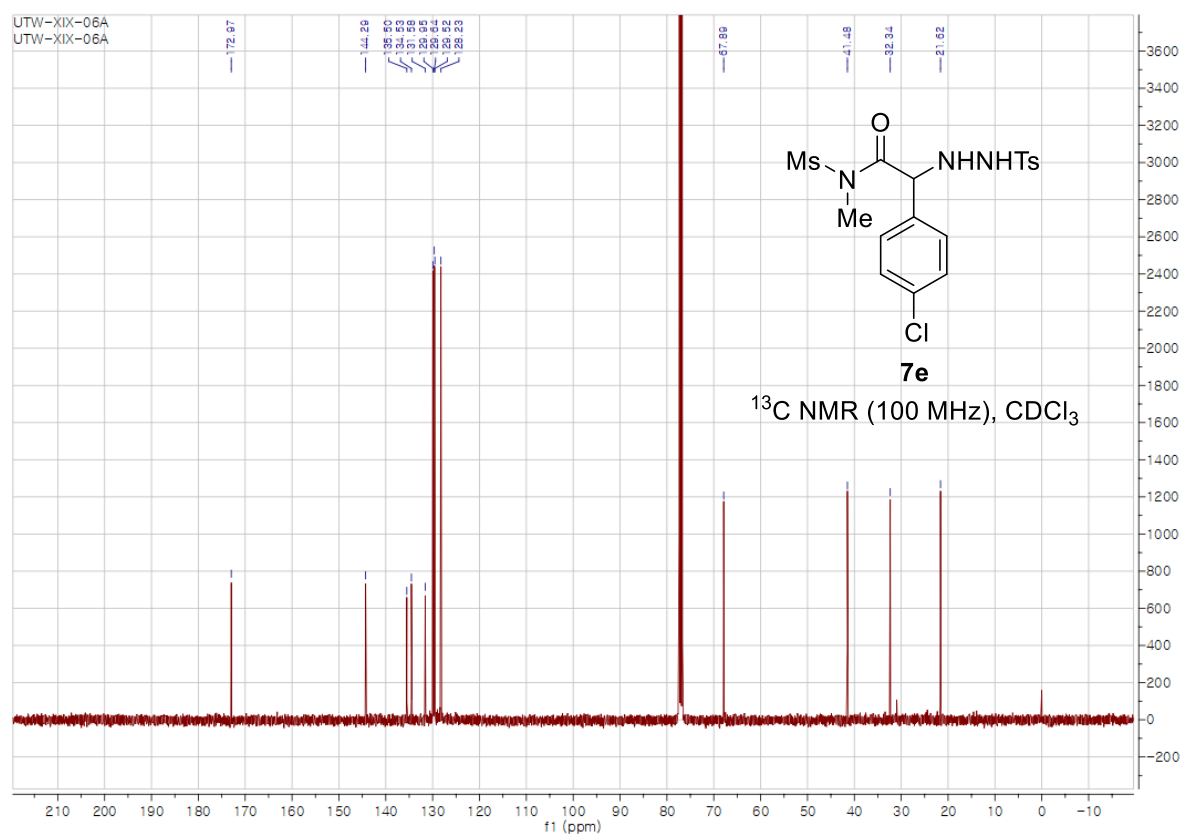

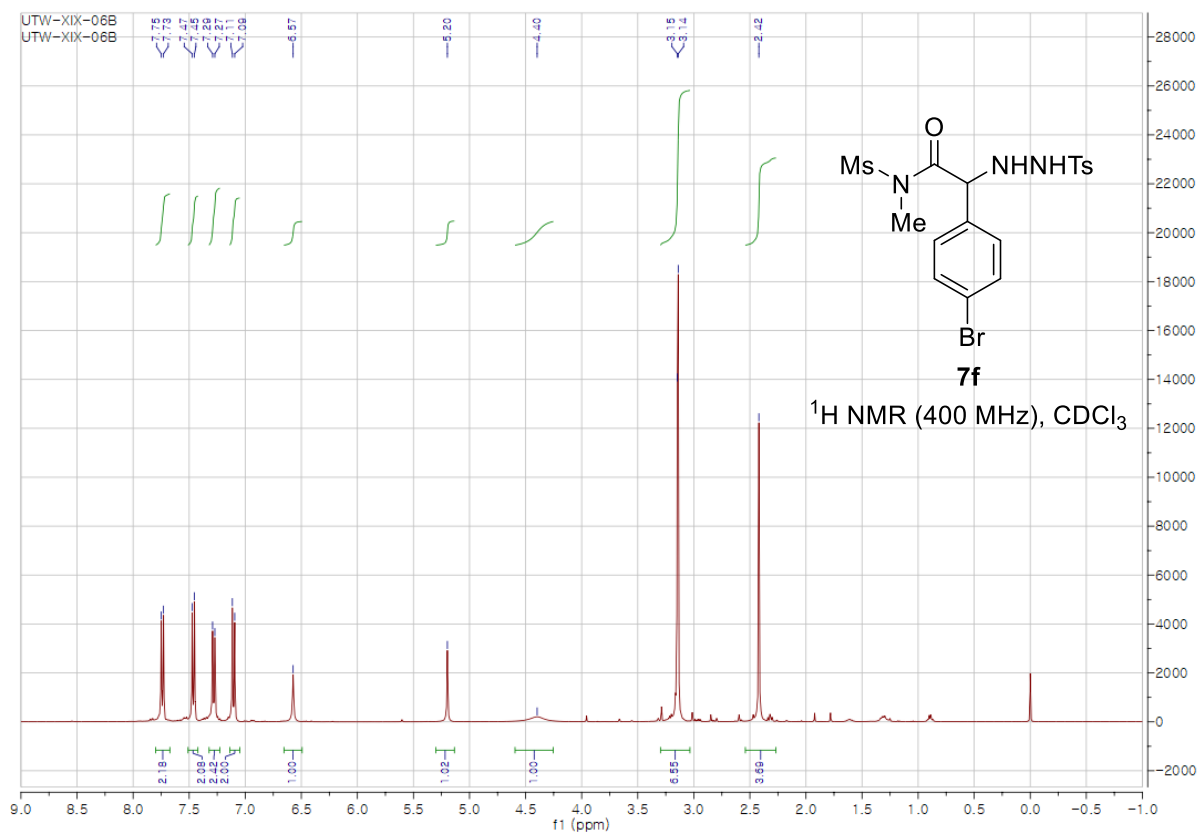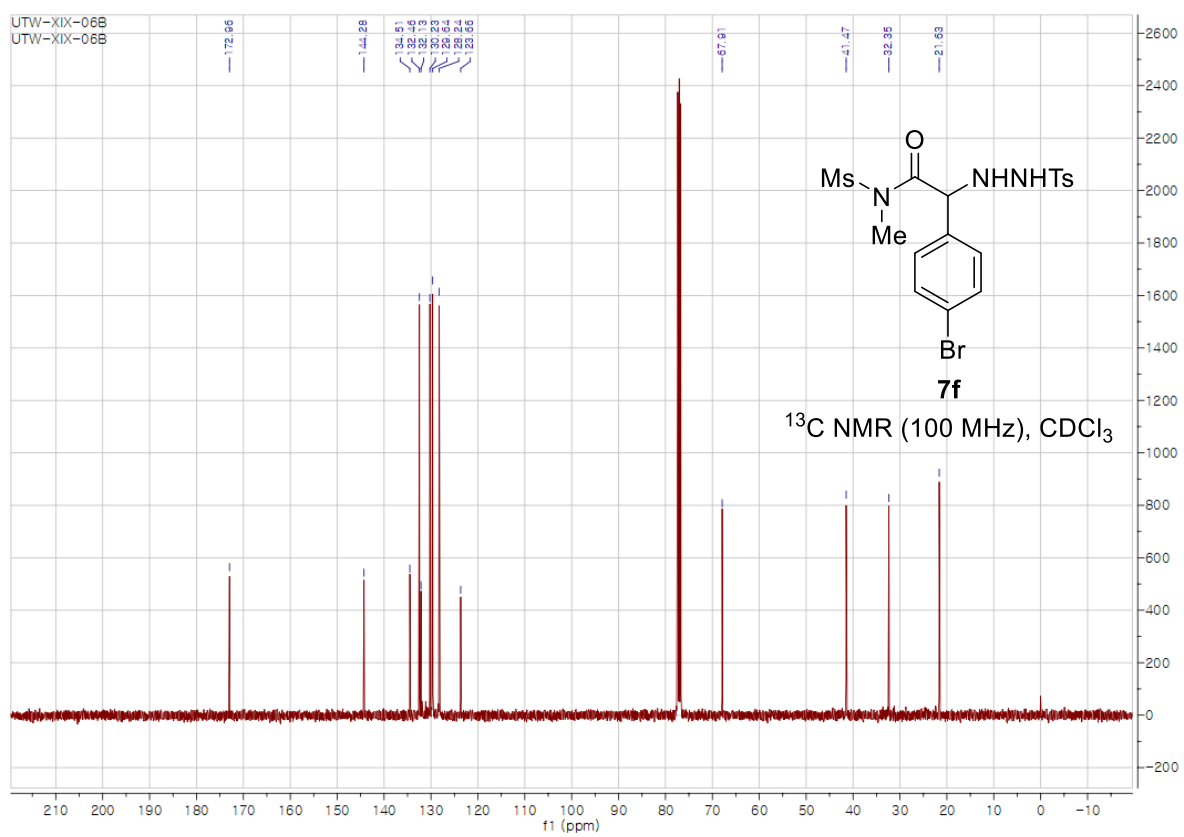

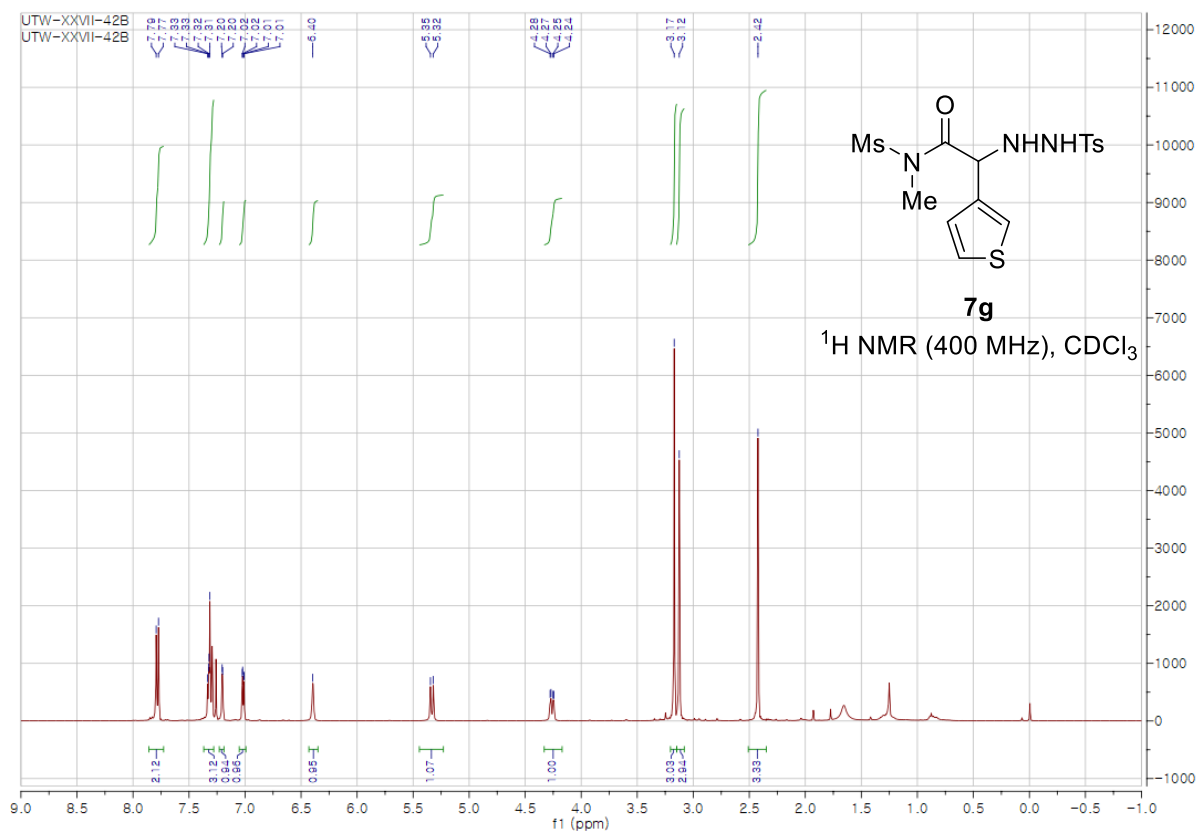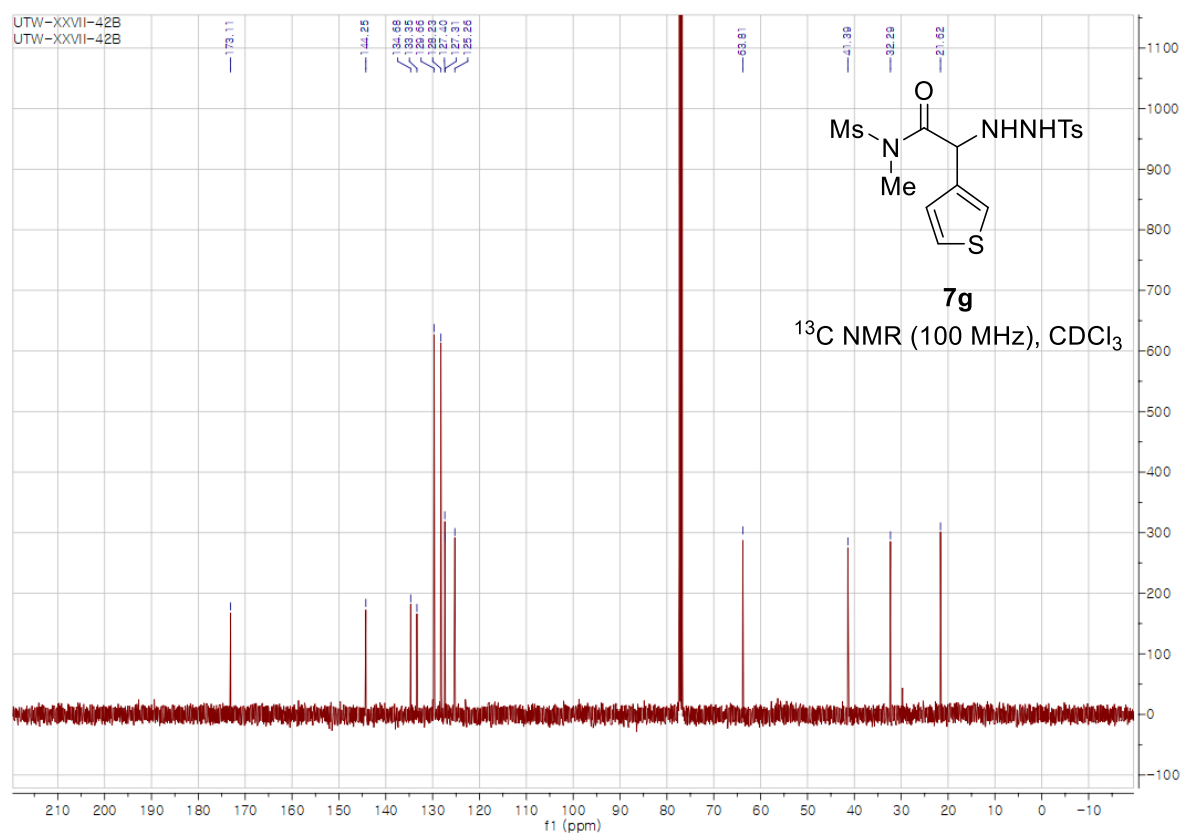

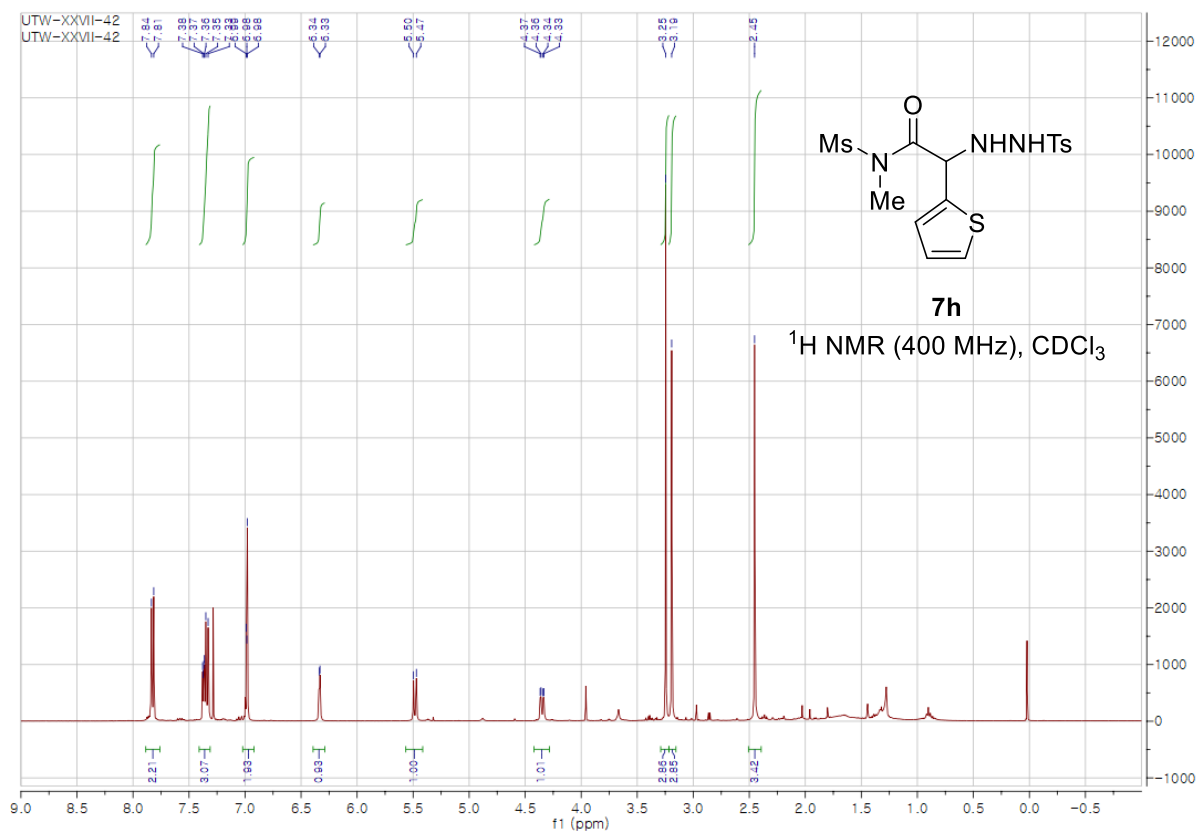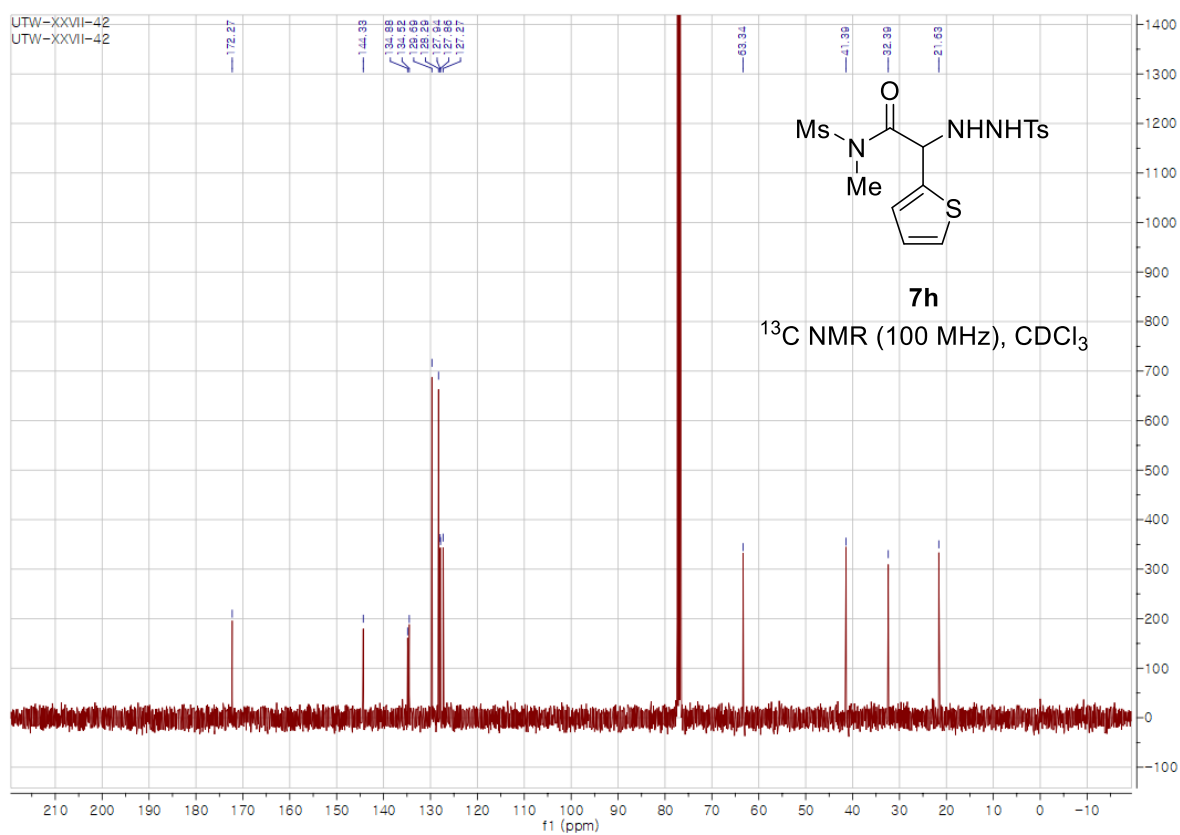

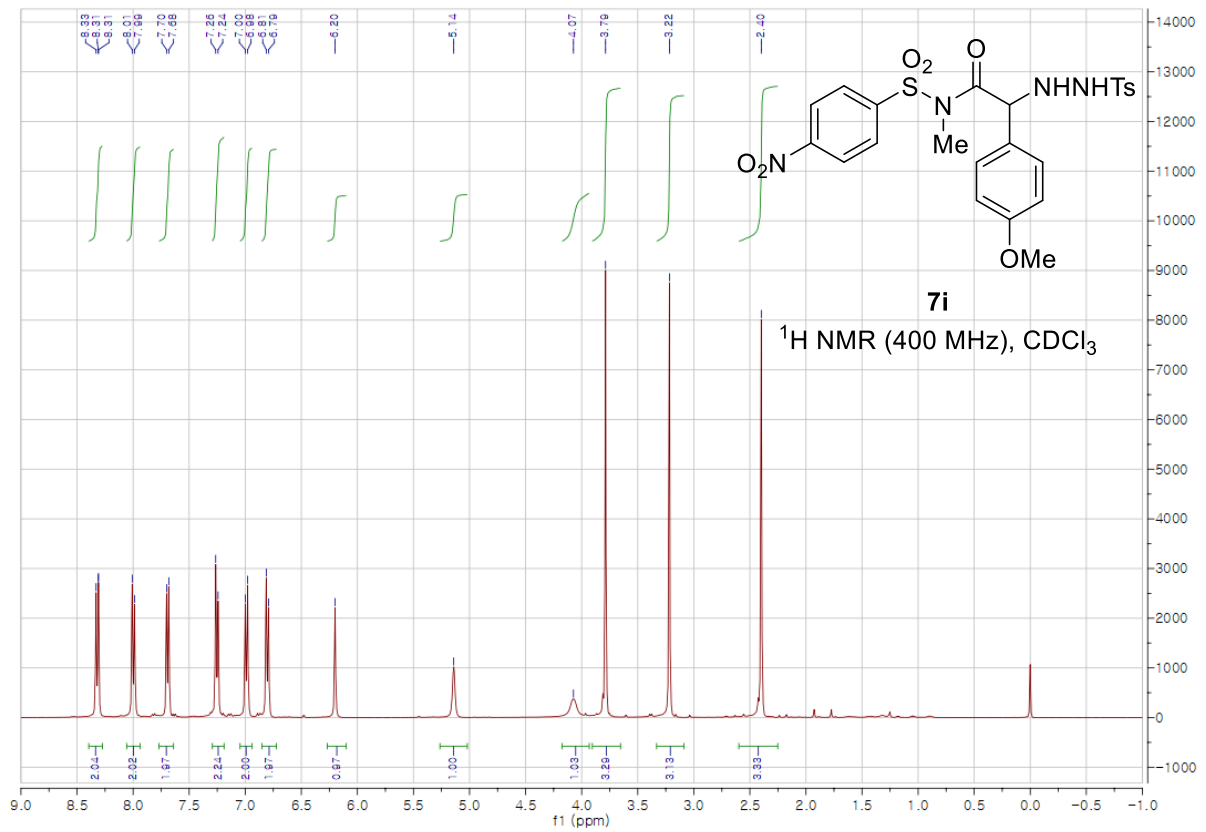



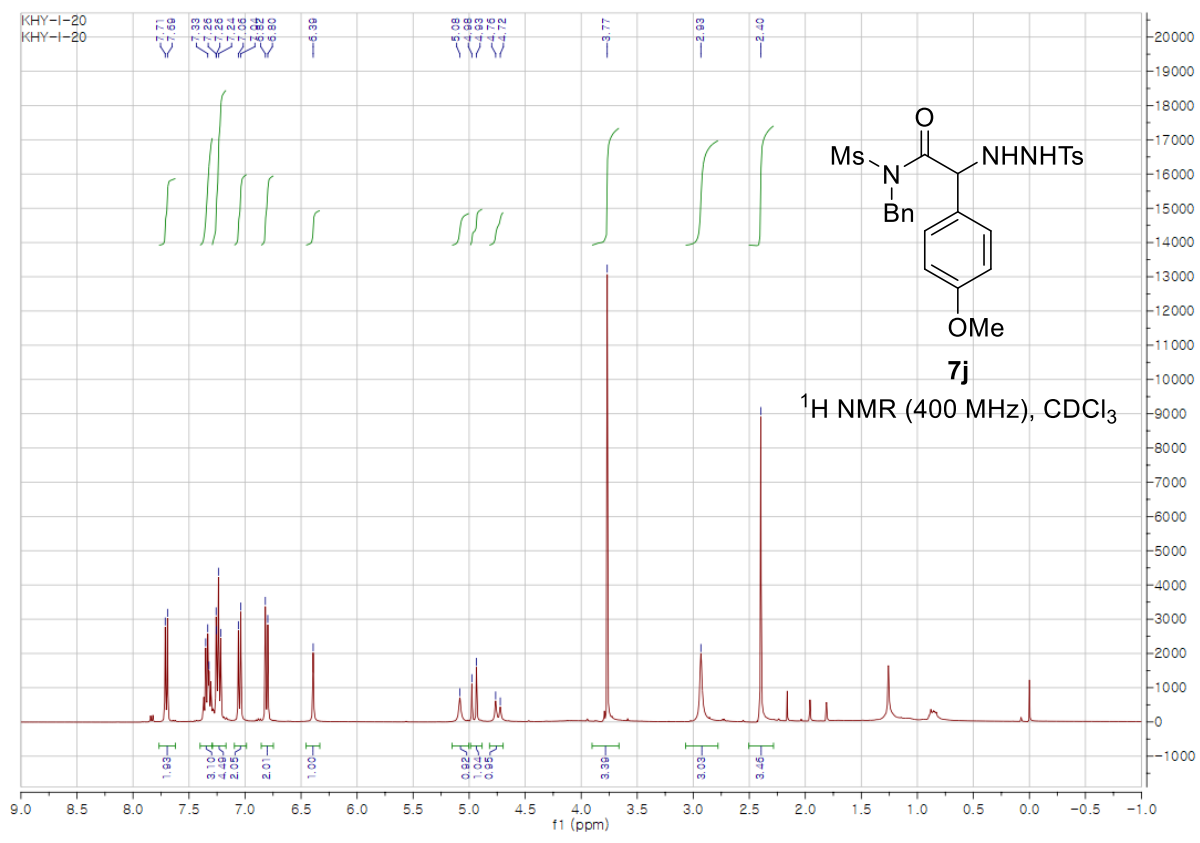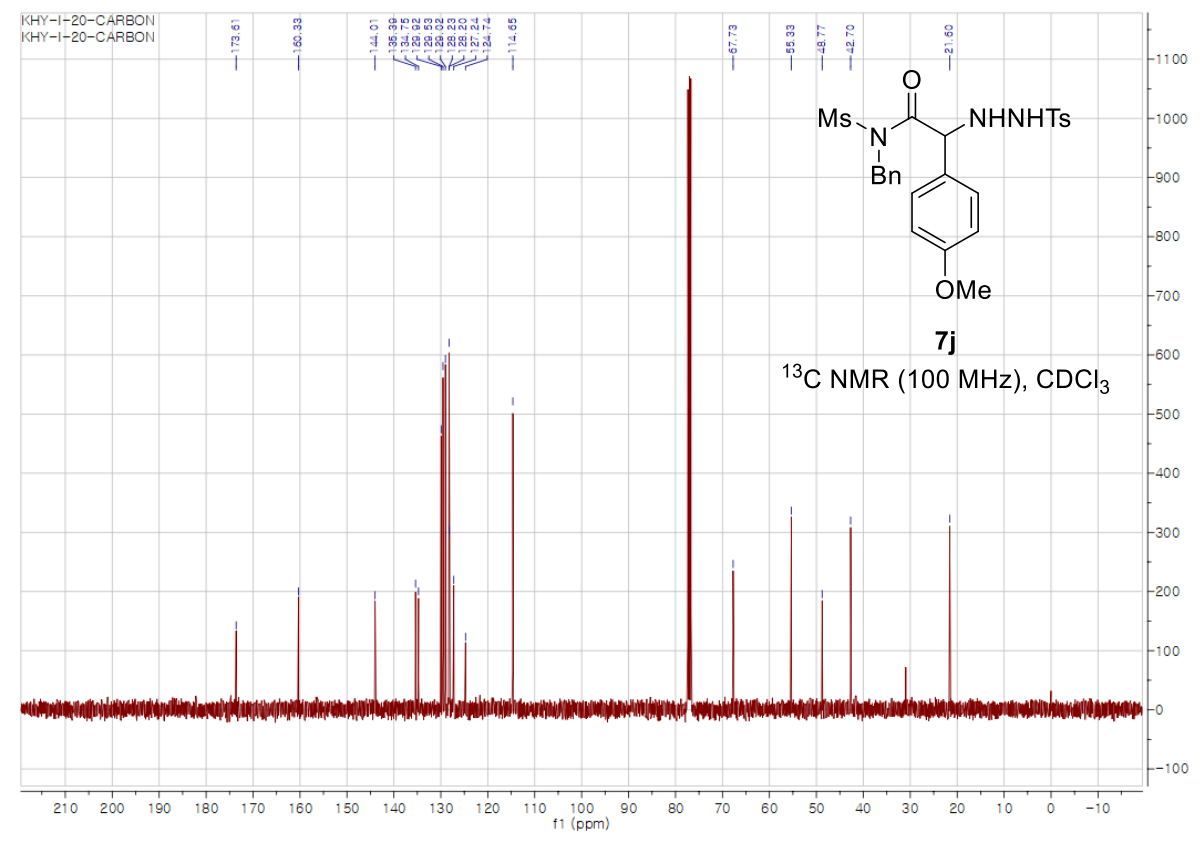

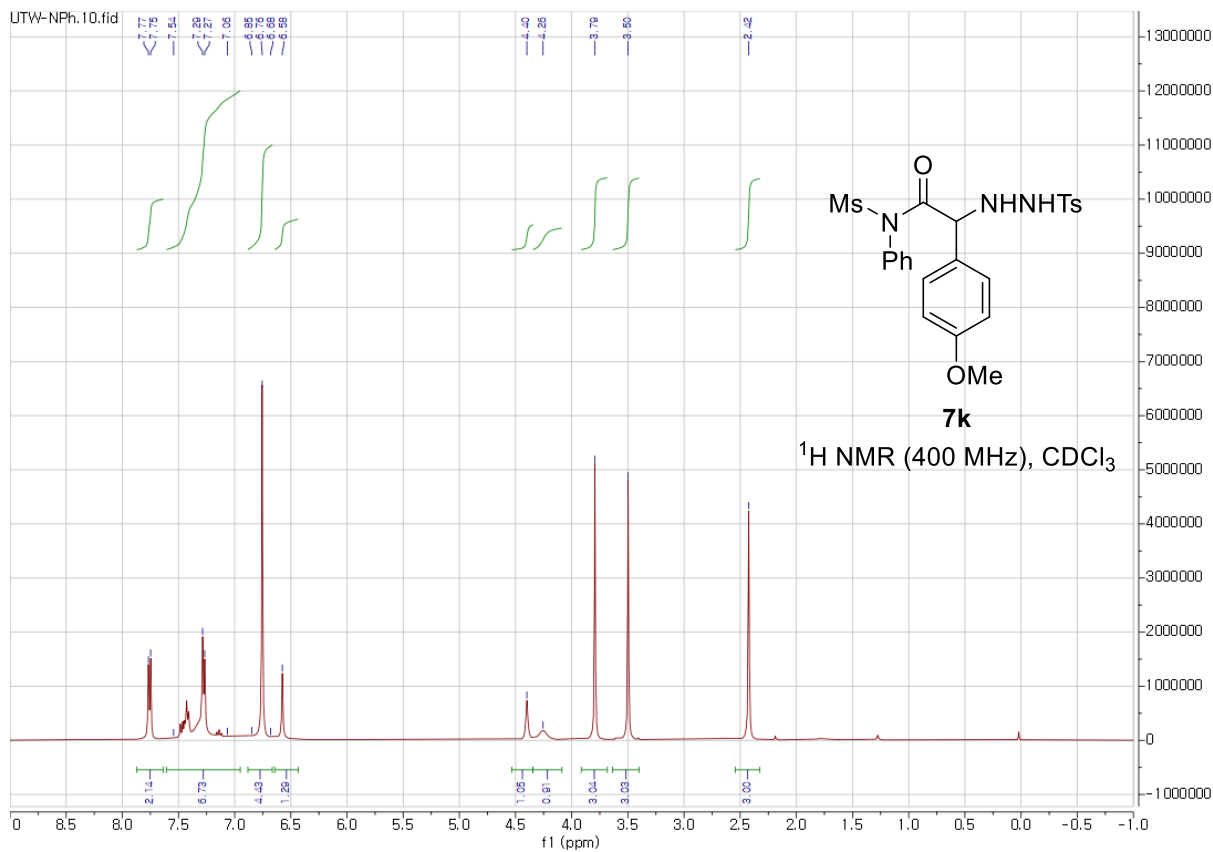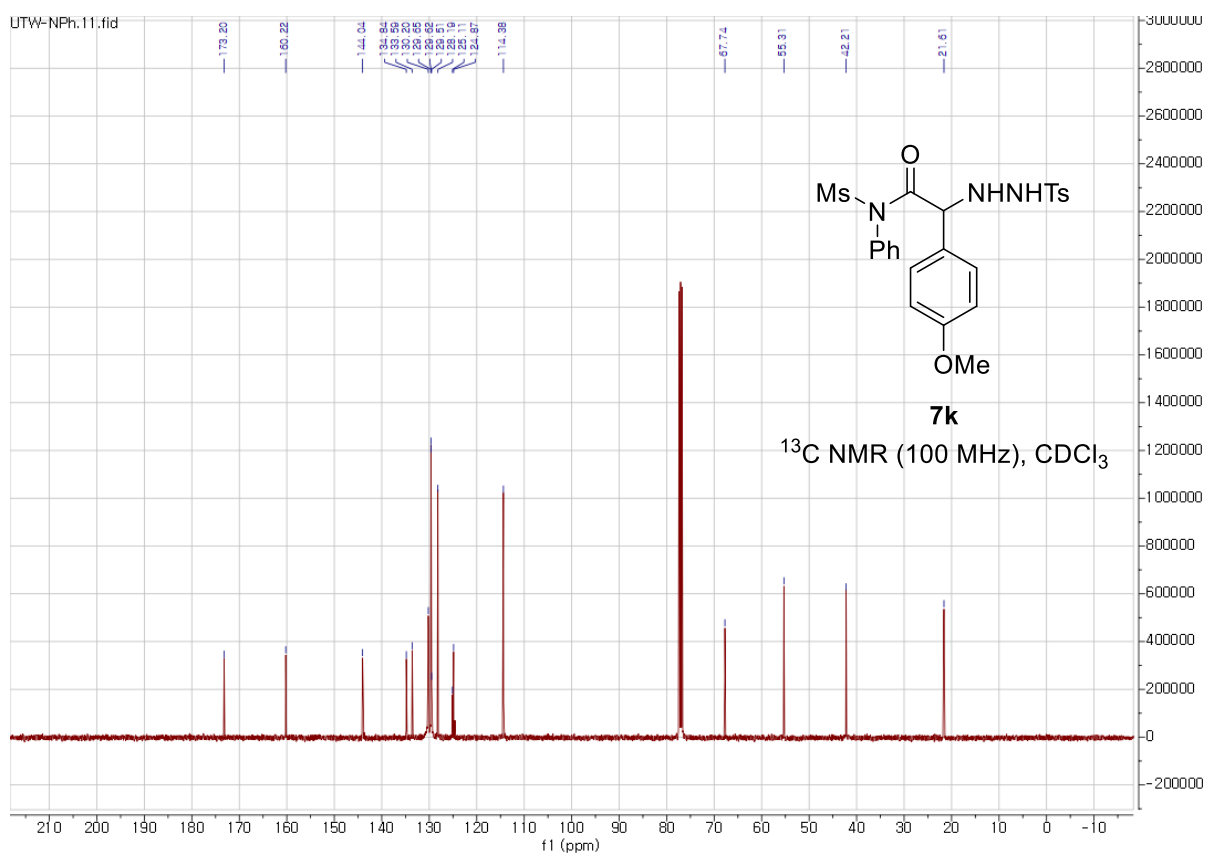

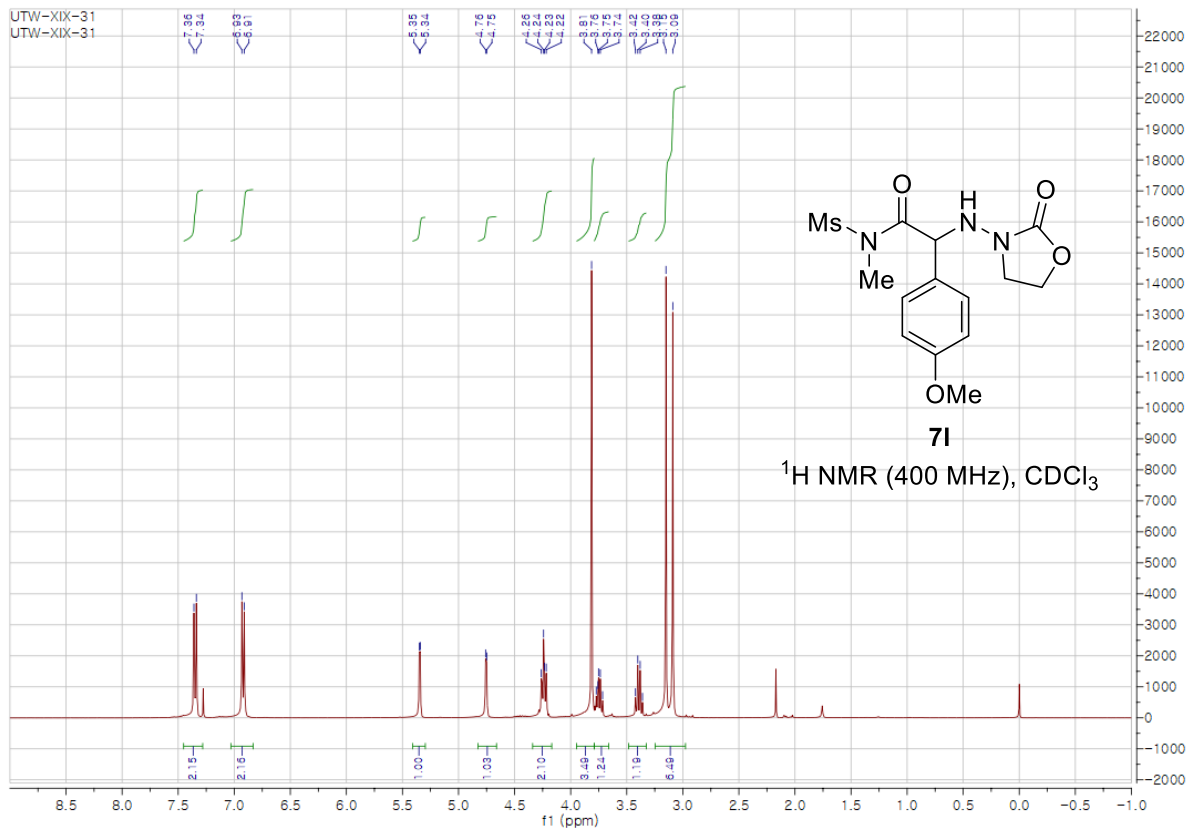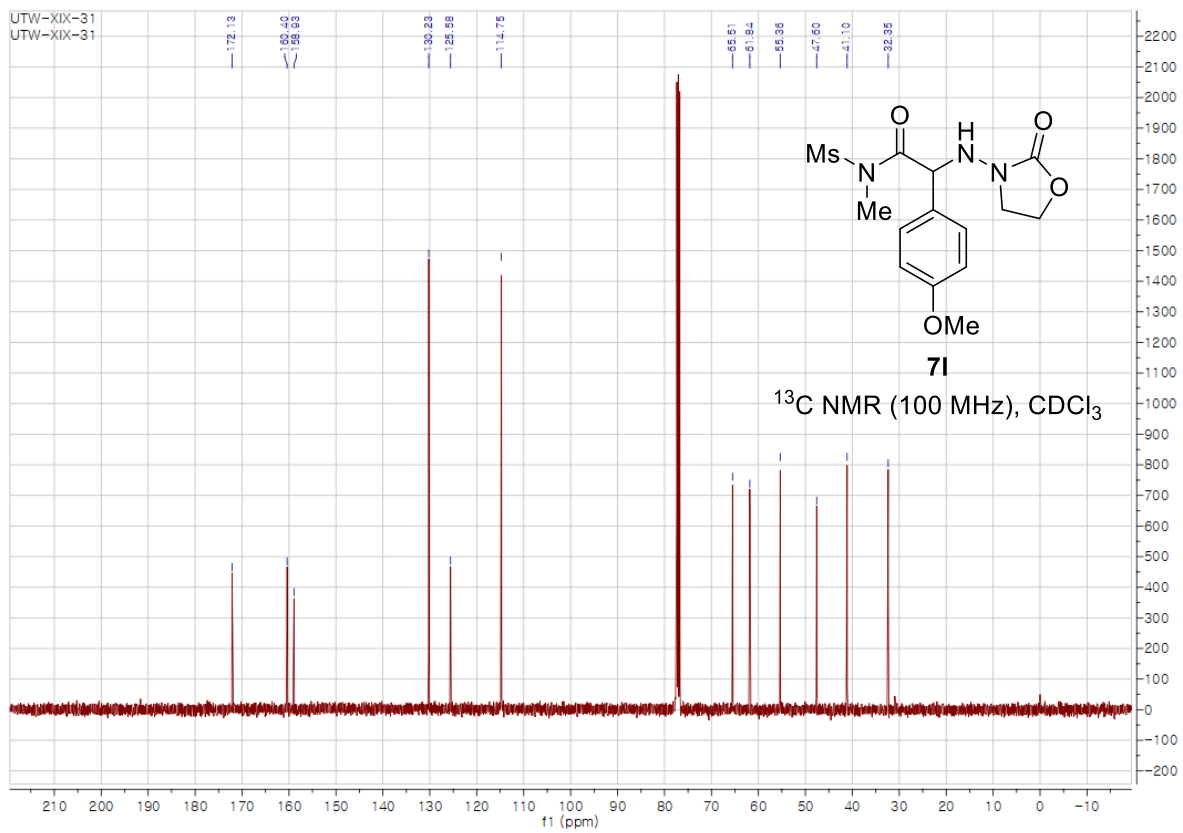

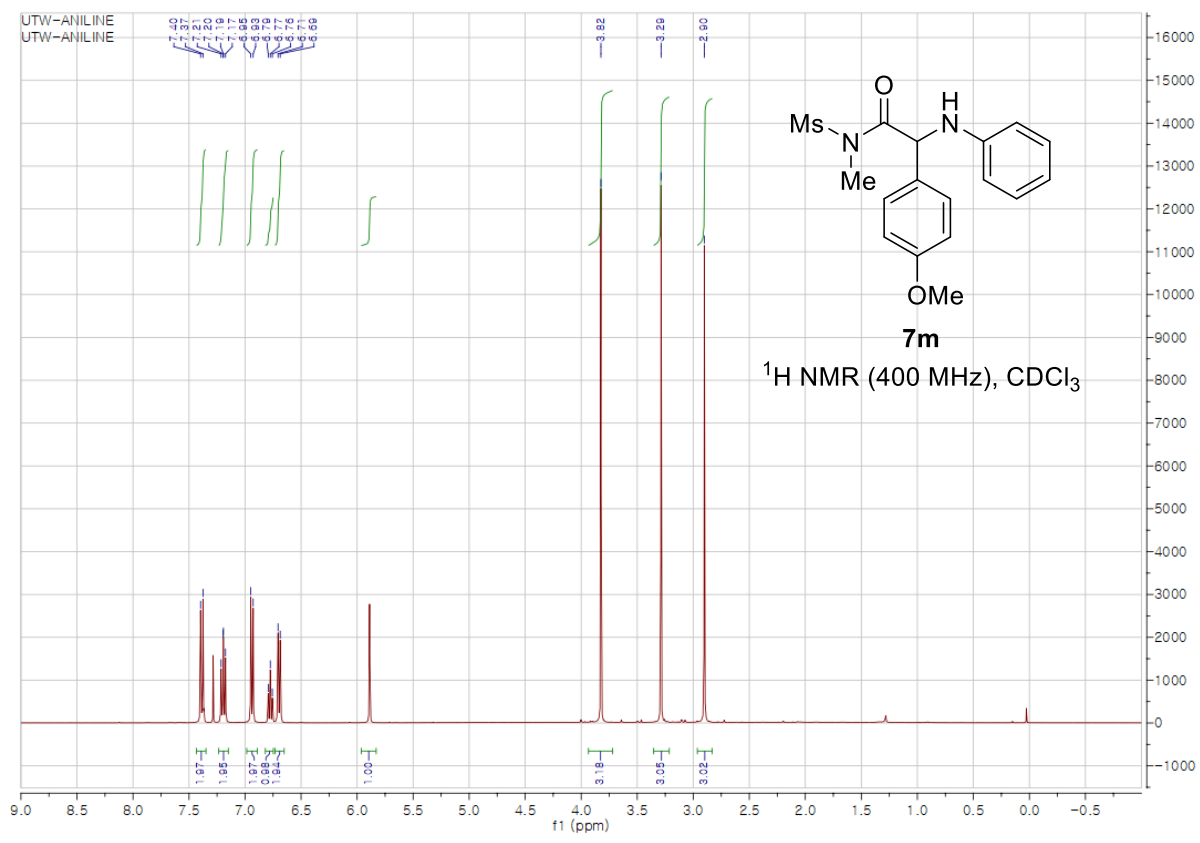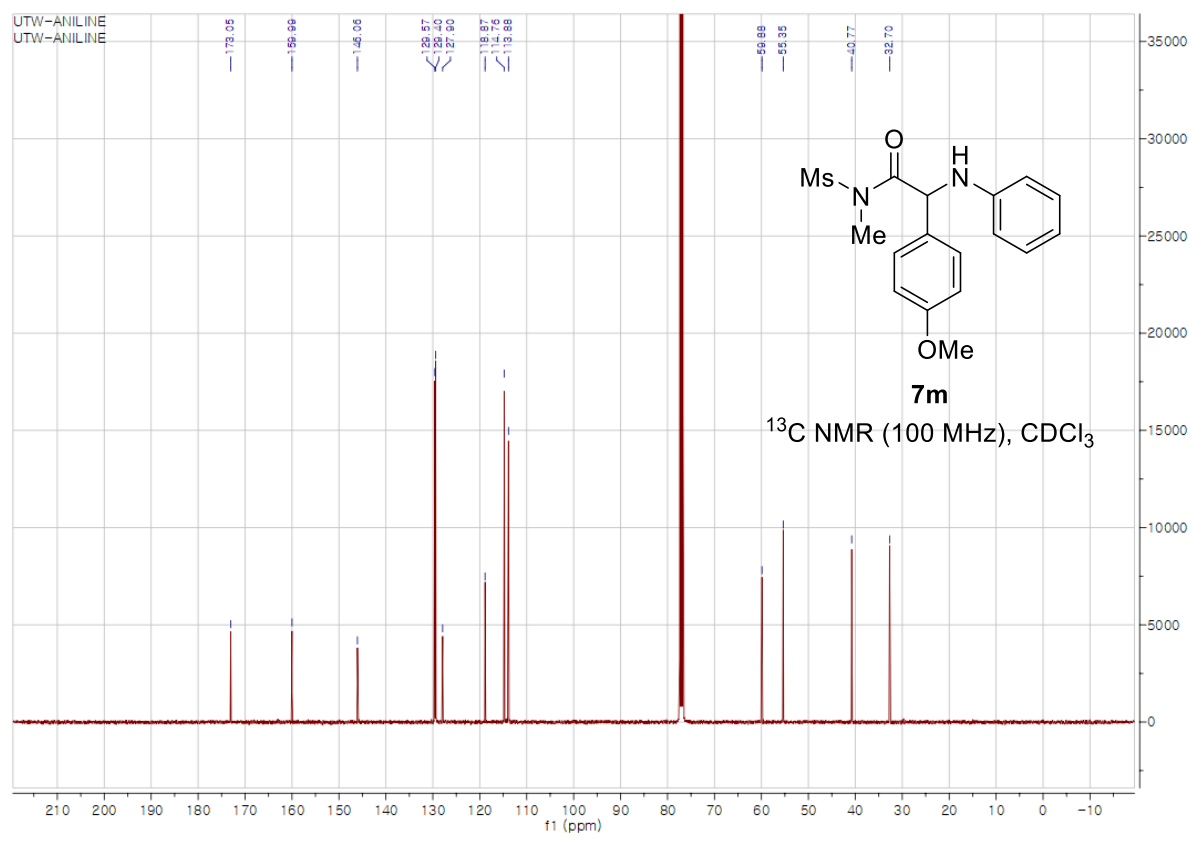

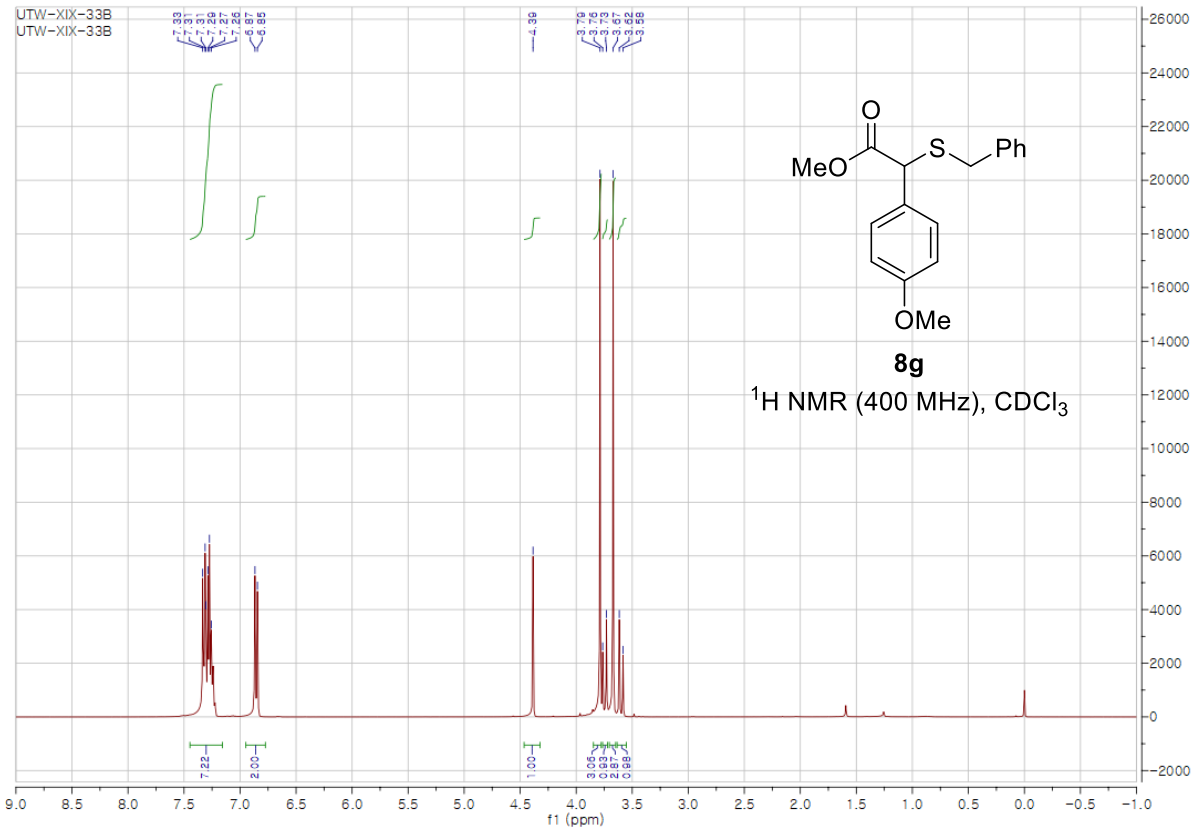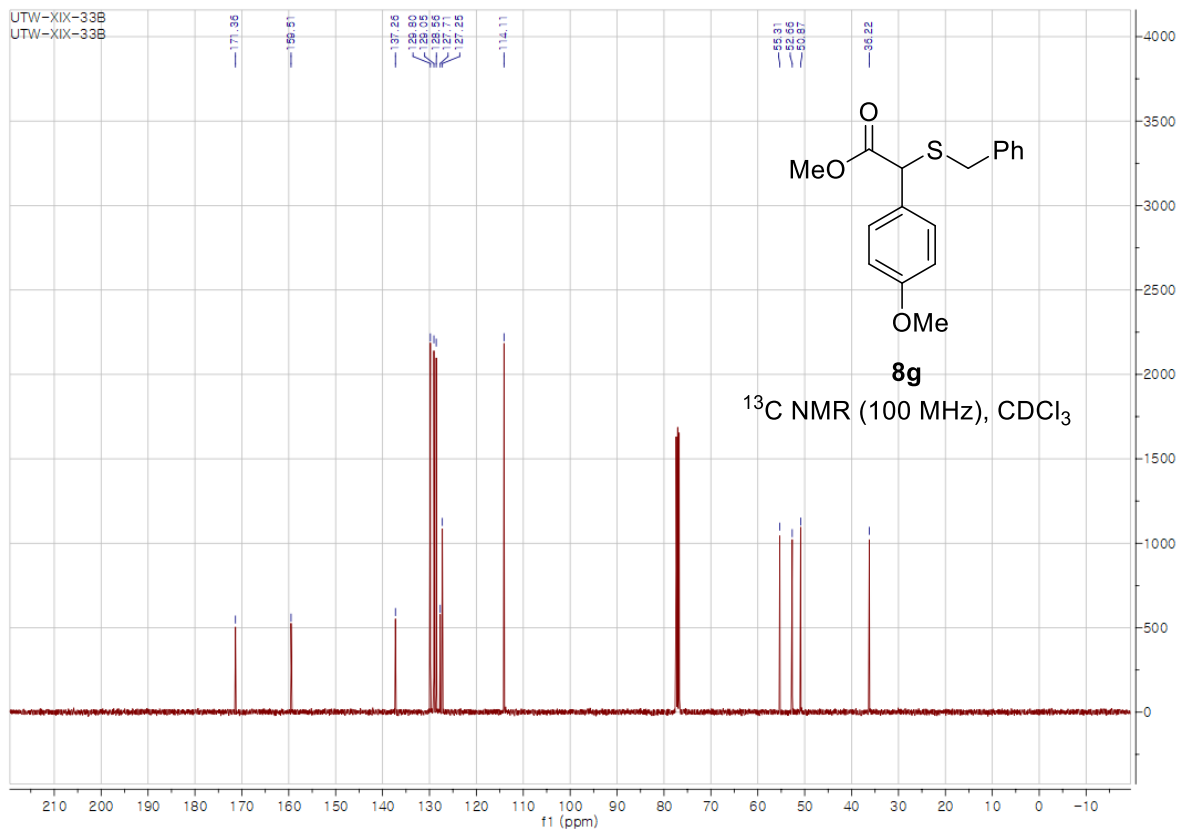

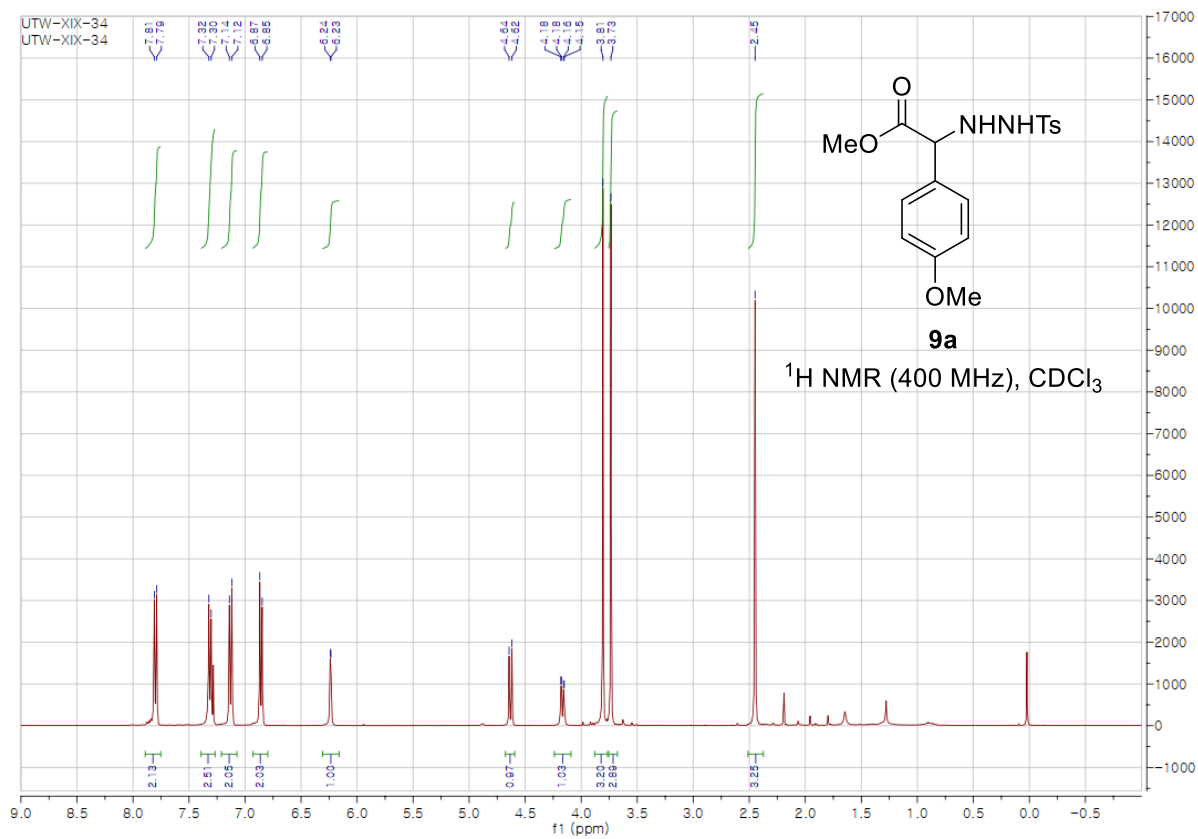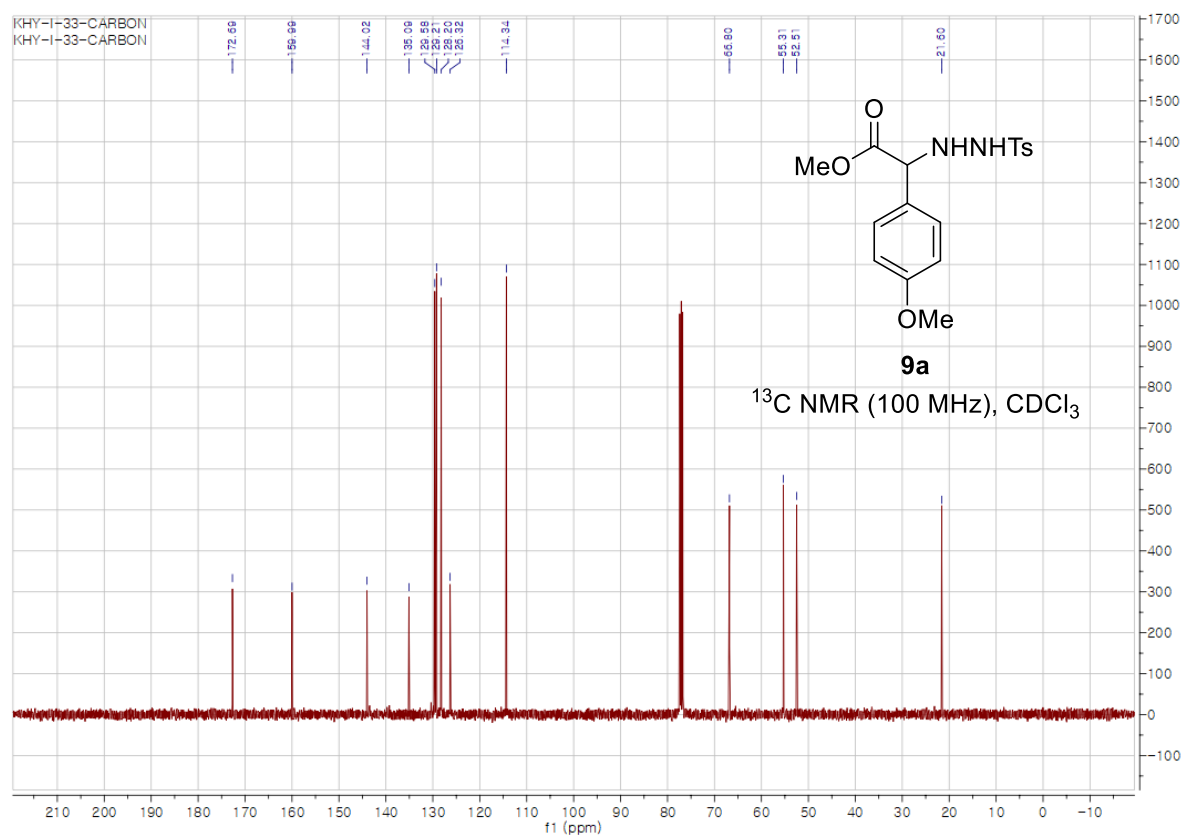

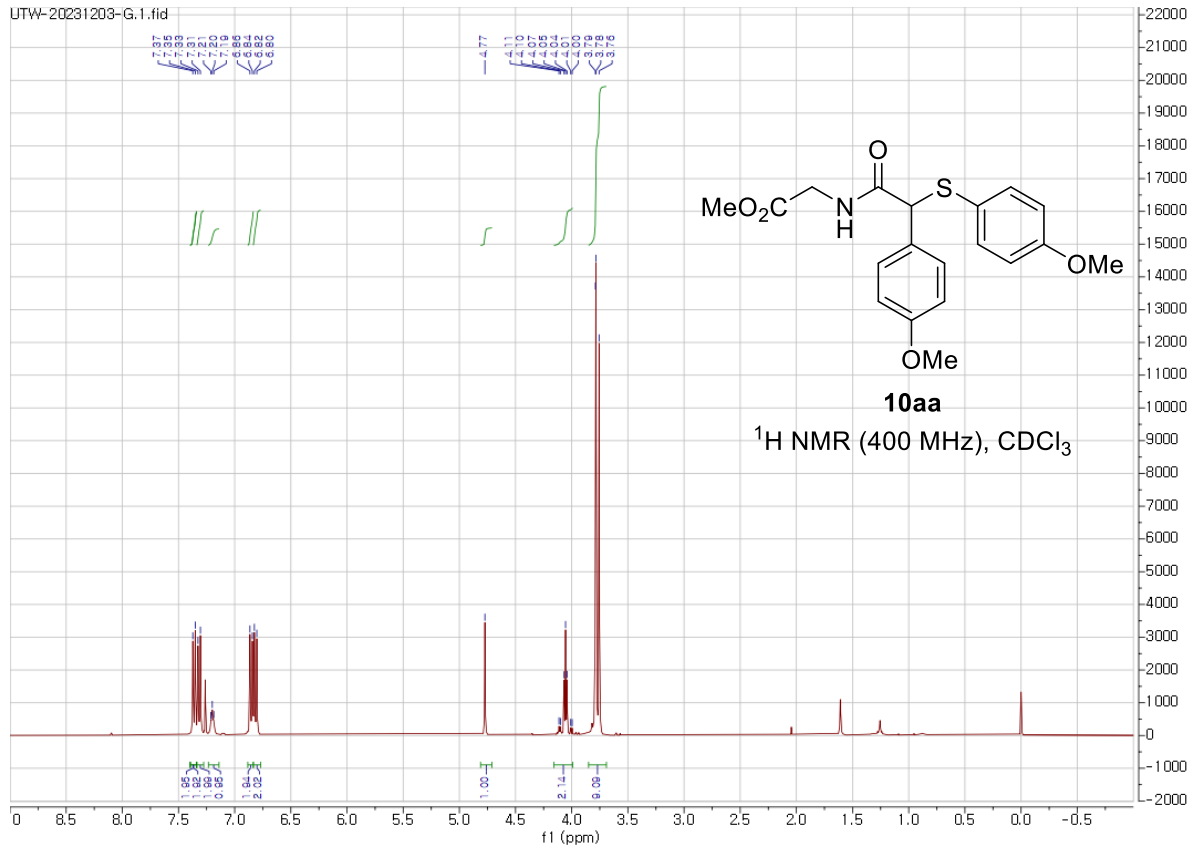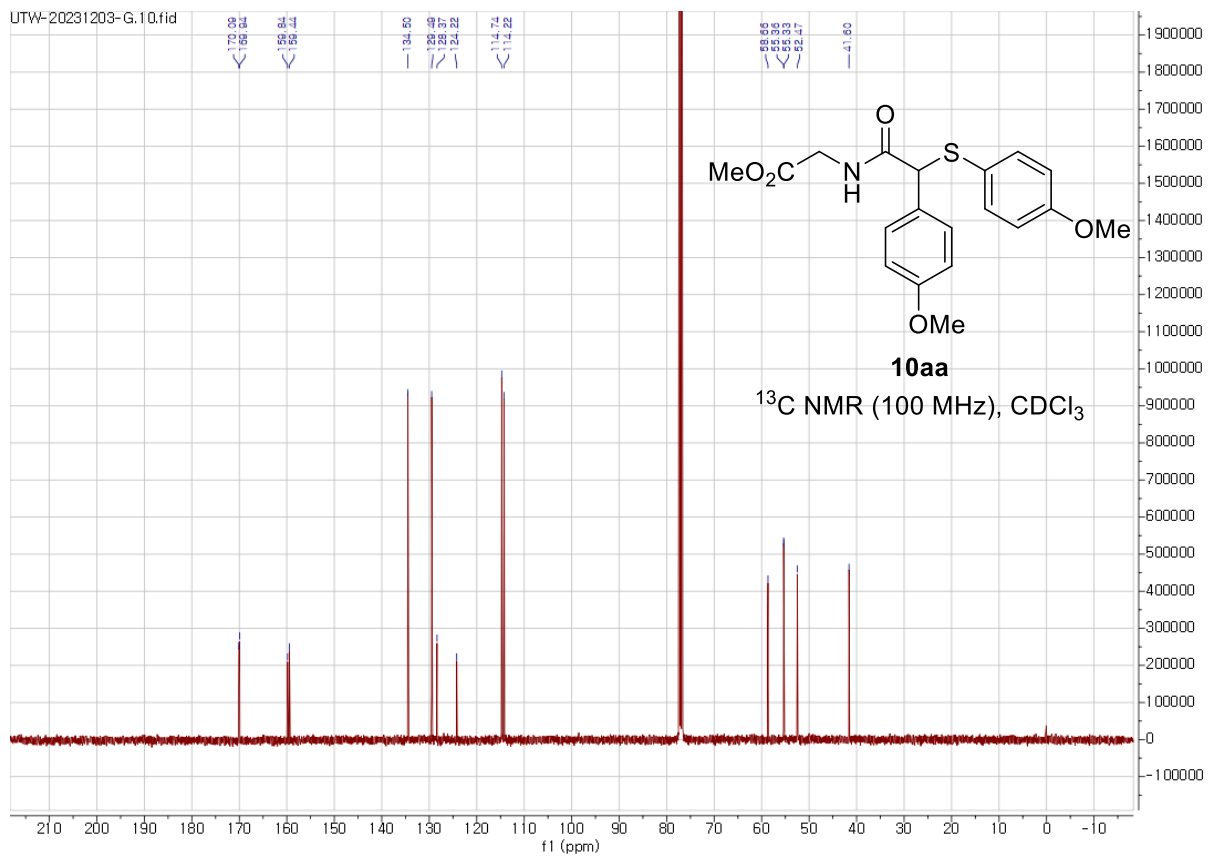

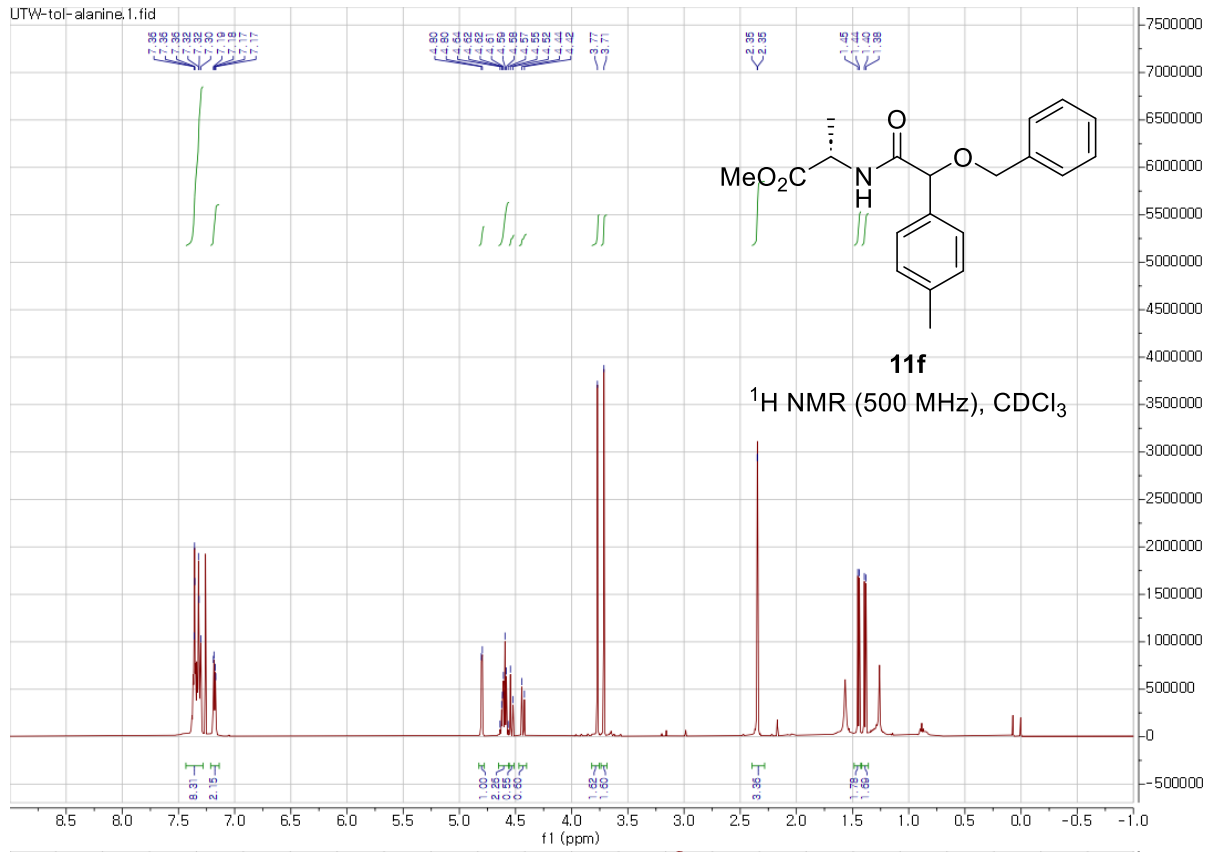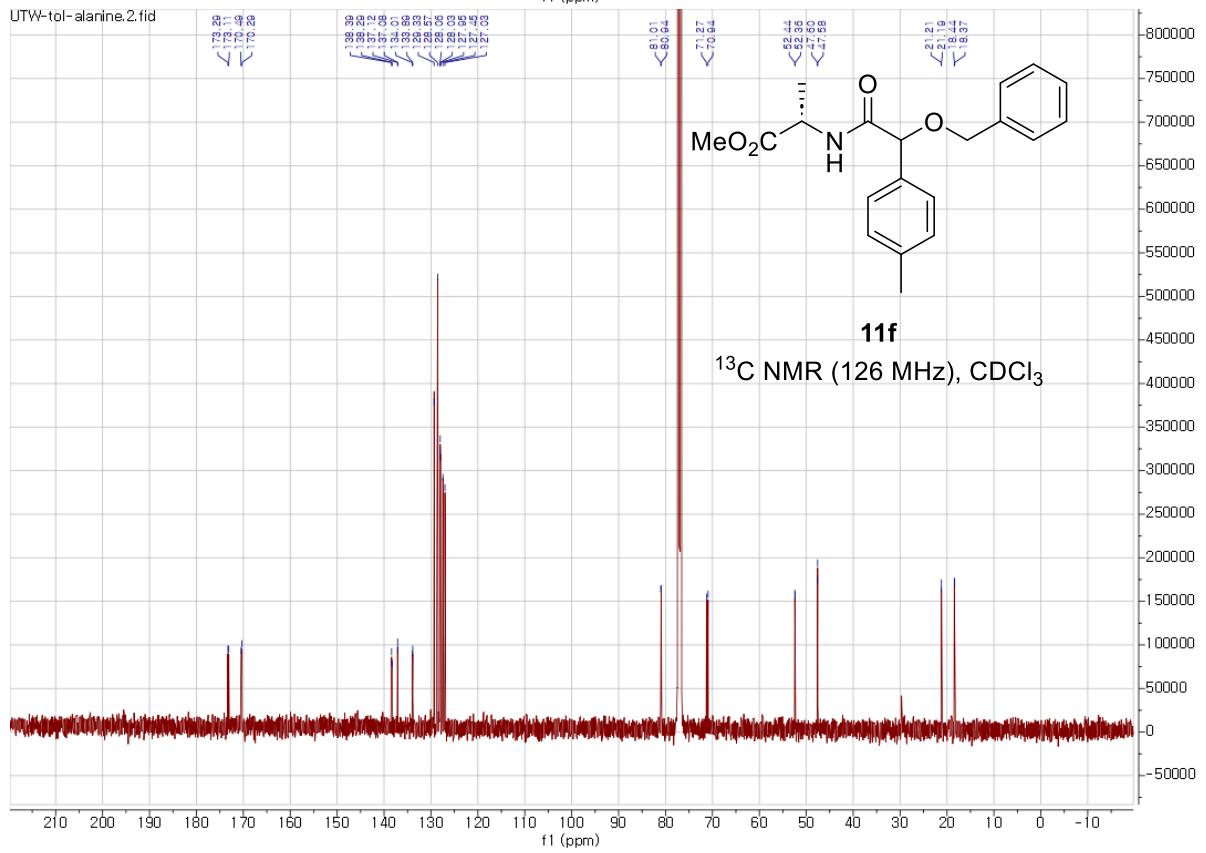





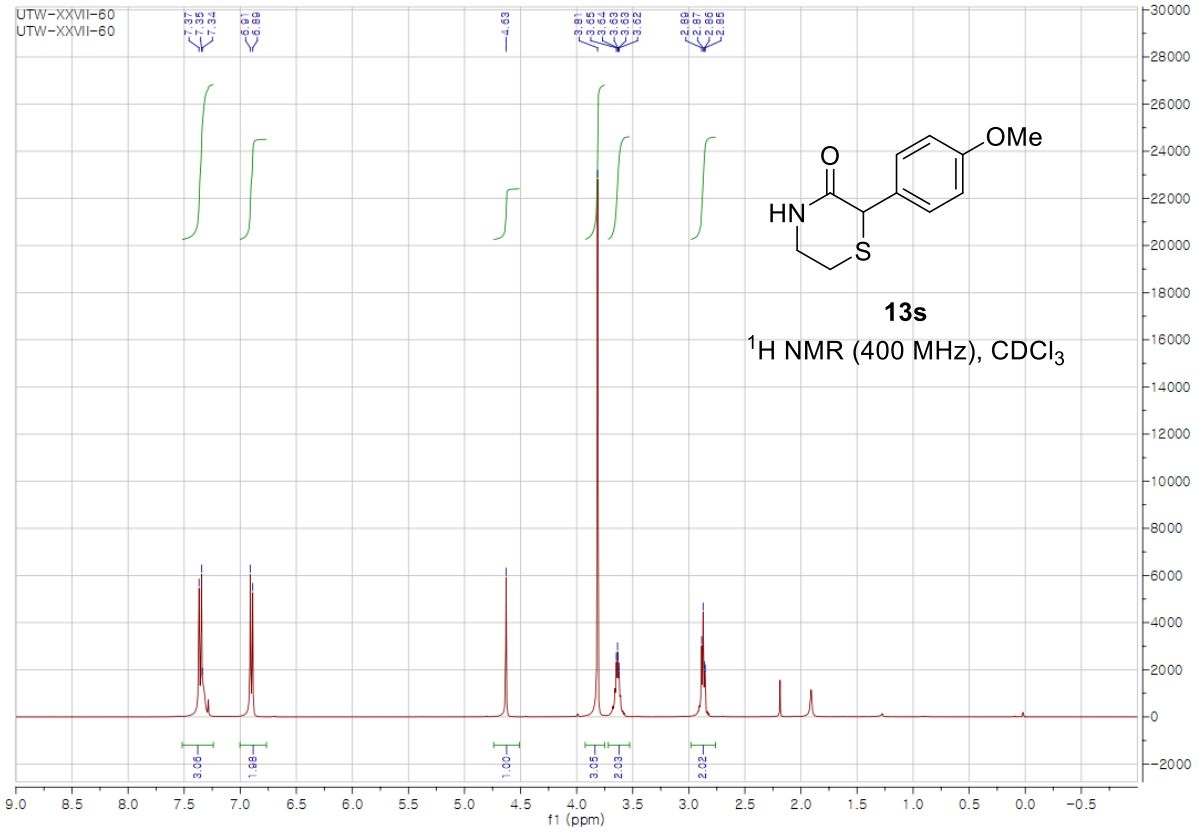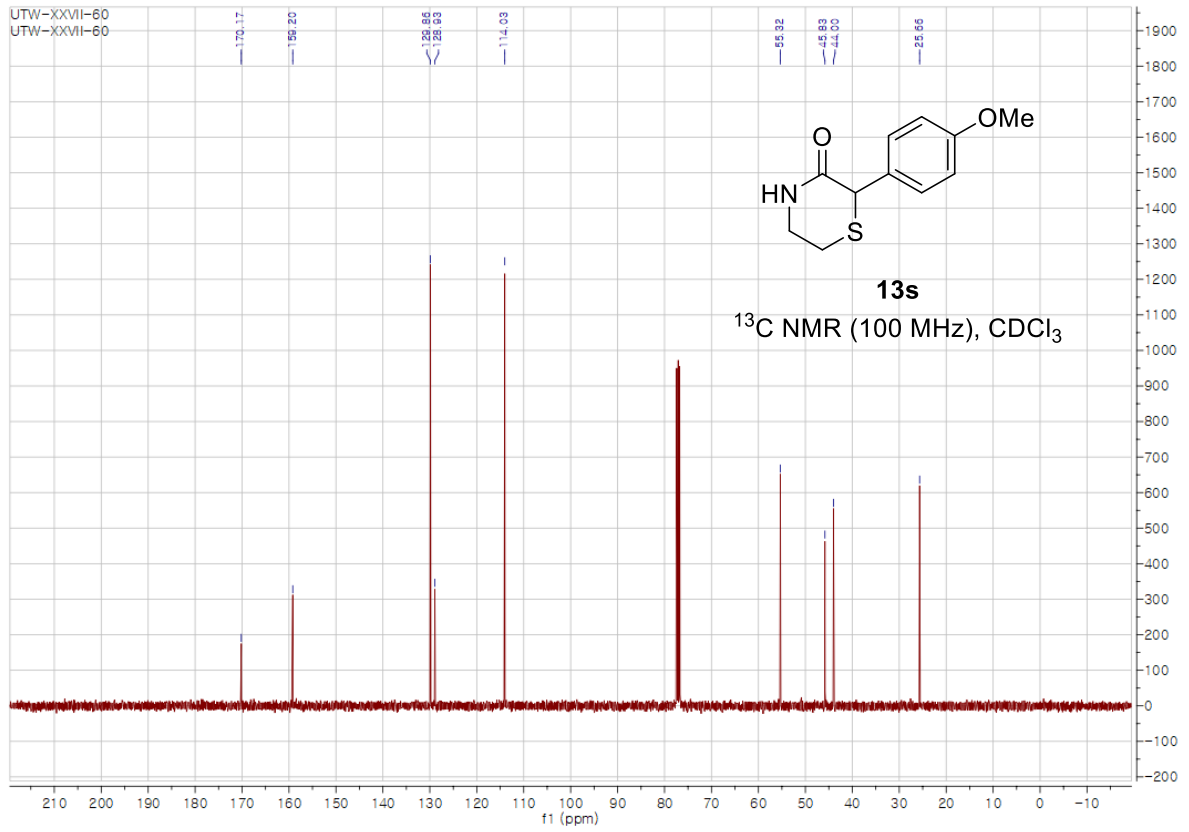

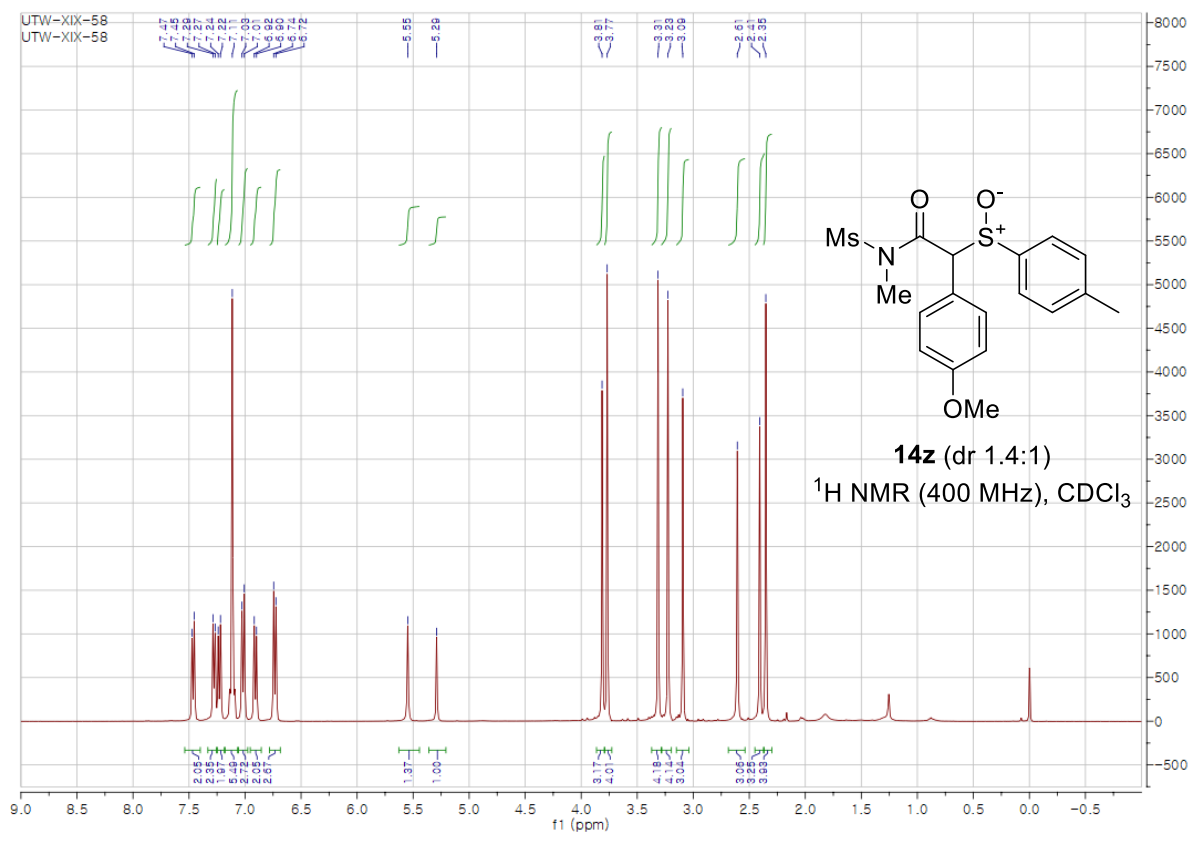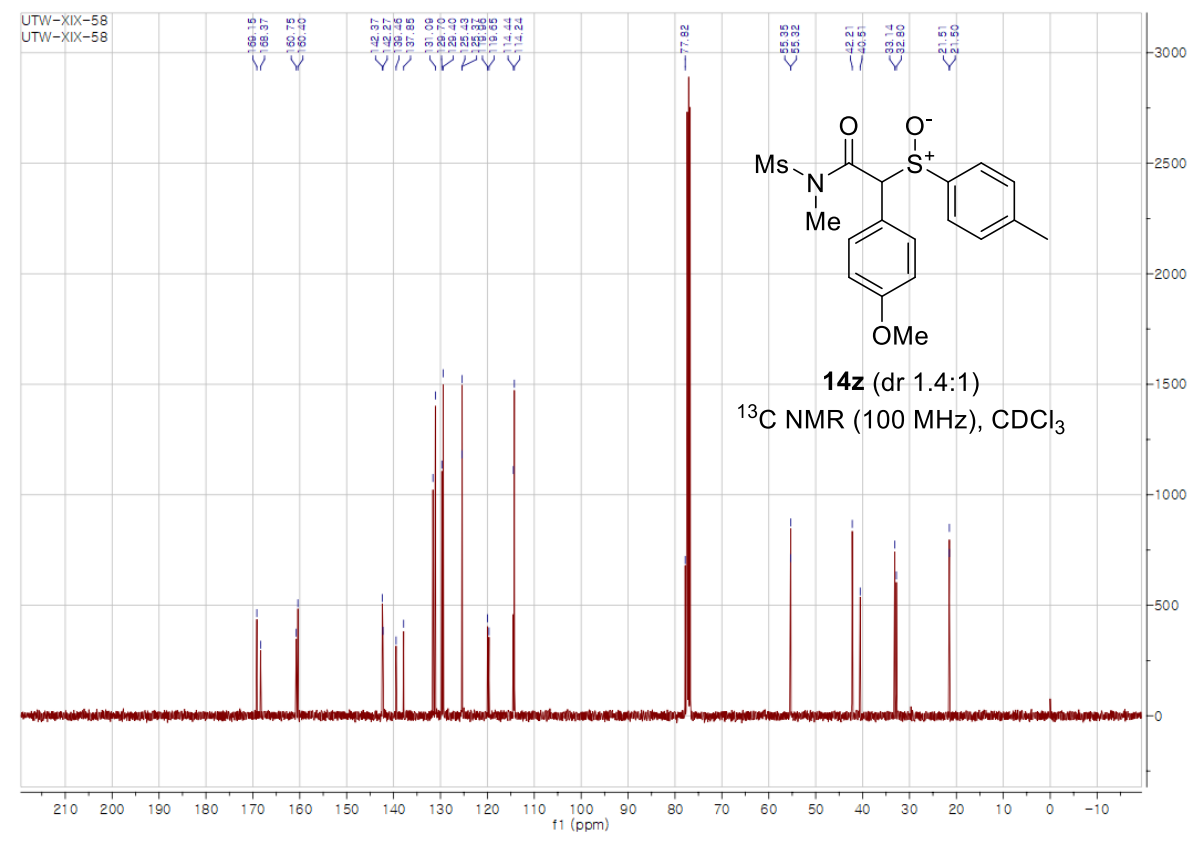

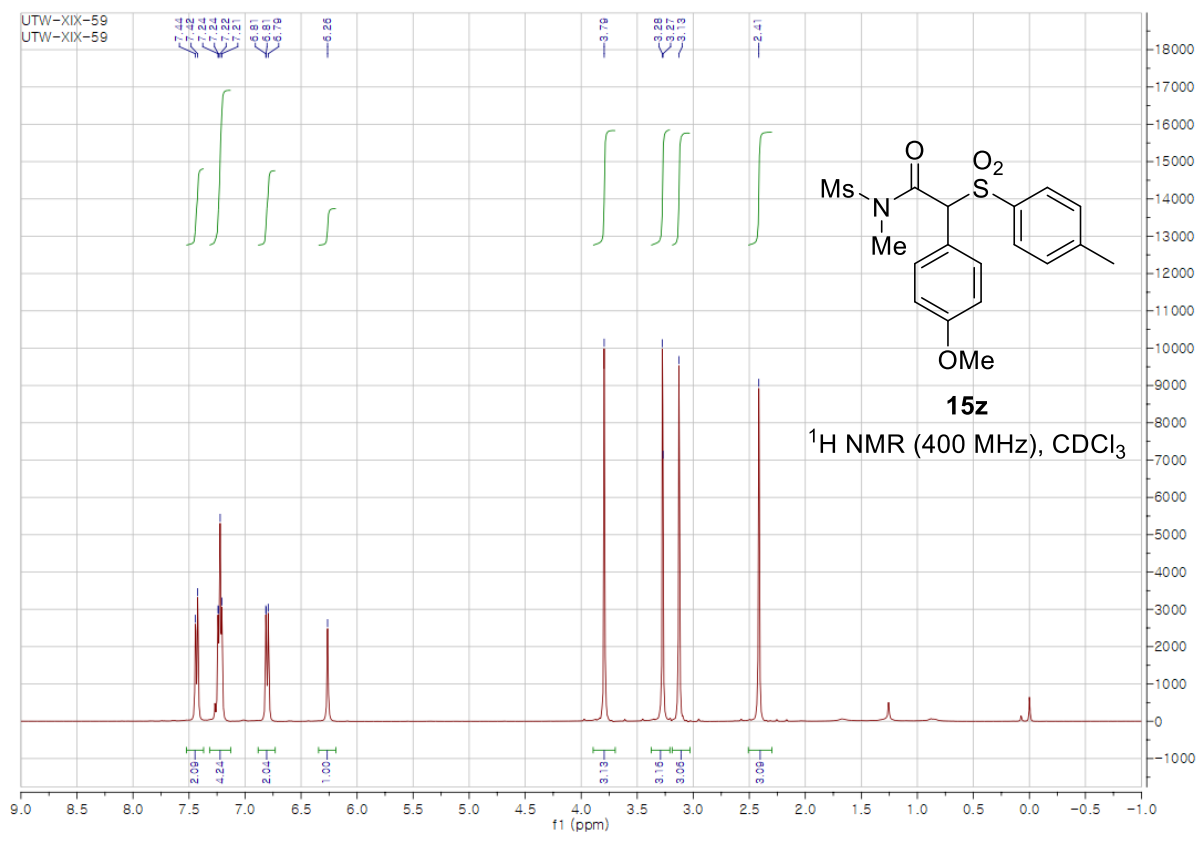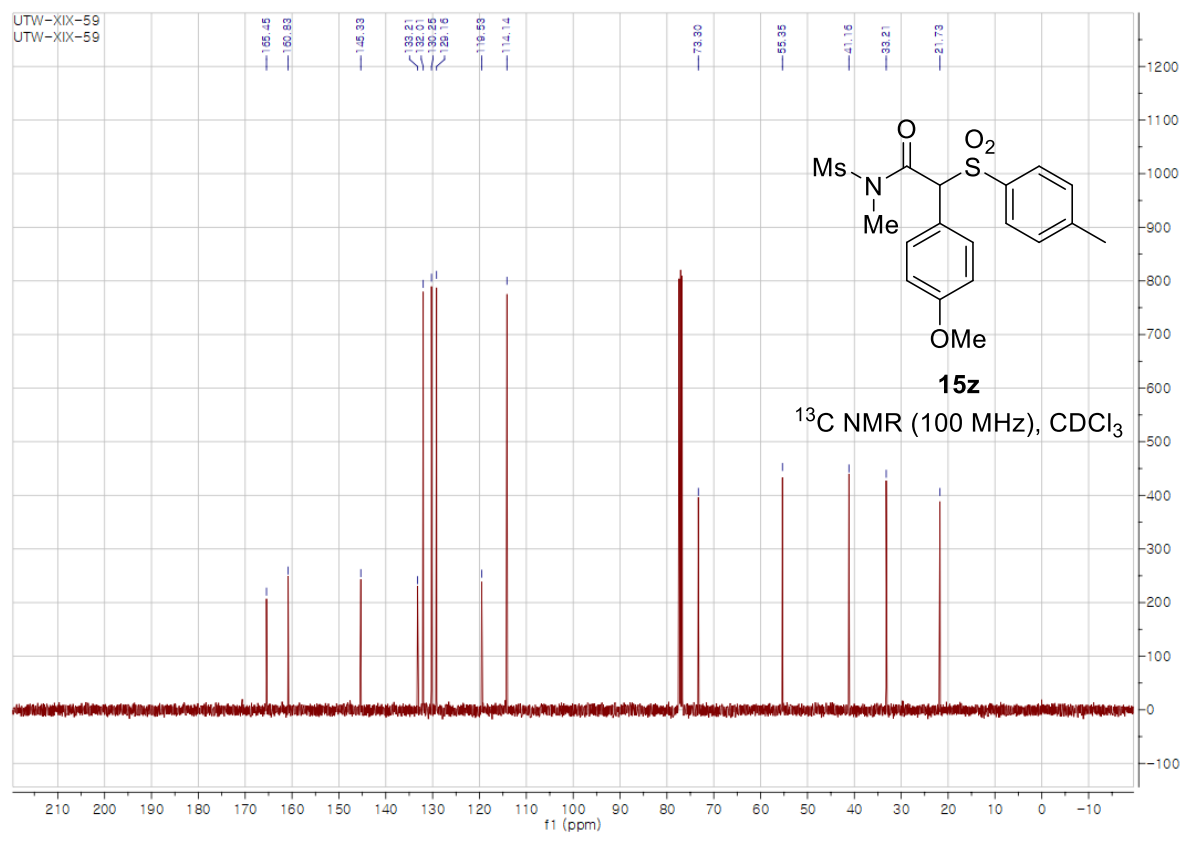

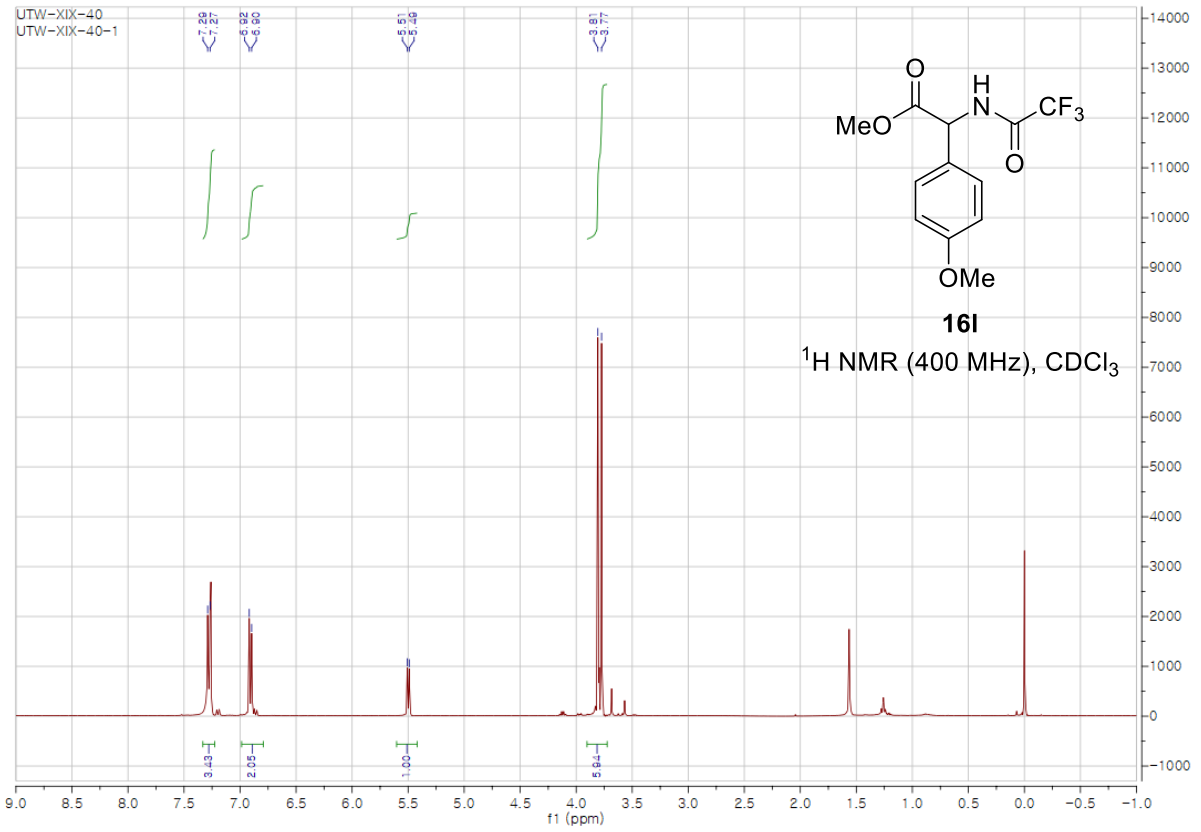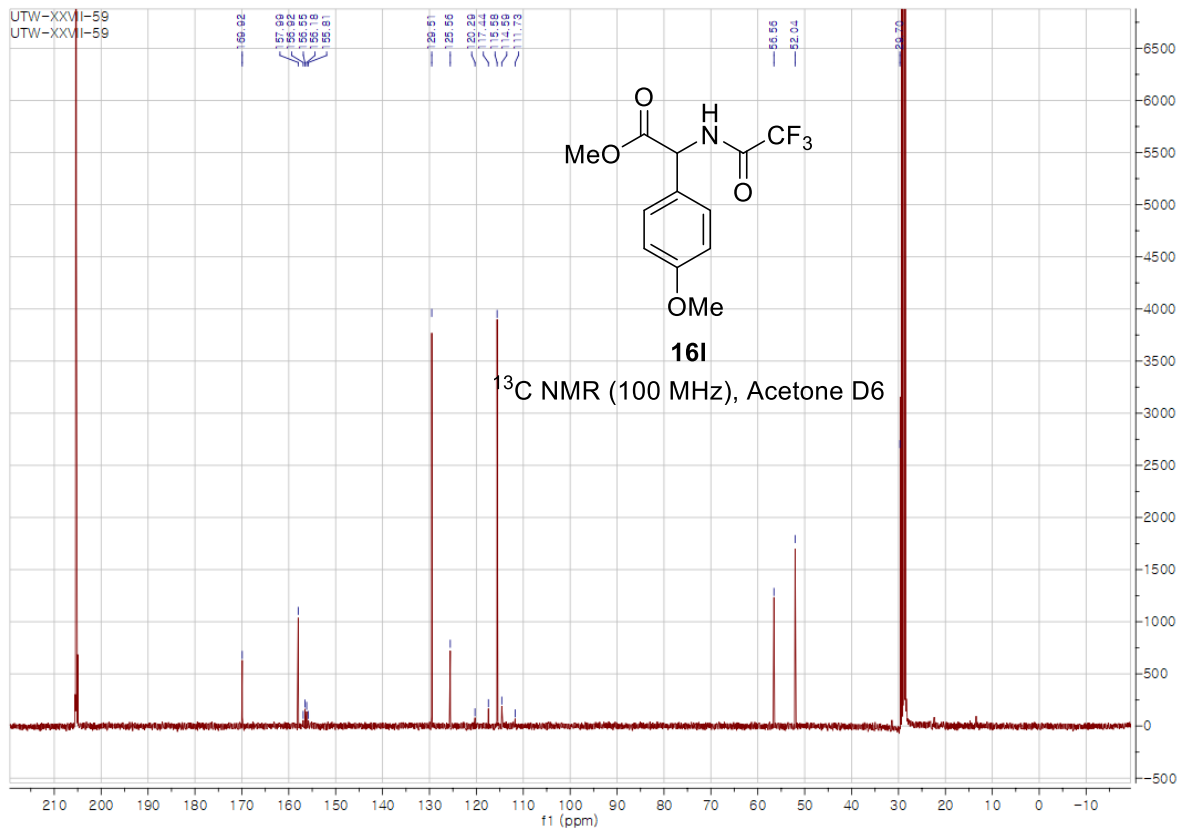

Supplement: d3qo02134c1.pdf [file d3qo02134c1.pdf]
