# Supplementary material for: Synthesis of α-heterofunctionalized carbonyl compounds via Brønsted acid-catalyzed oxygenative coupling of ynamides
Source: Royal Society of Chemistry journal article supplement (doi:10.1039/d3qo02134c), 2024-01-01
Supplement: d3qo02134c2.pdf [file d3qo02134c2.pdf]

*Supporting Information*

**Synthesis of  $\alpha$ -Heterofunctionalized Carbonyl Compounds  
via Brønsted Acid-Catalyzed  
Oxygenative Coupling of Ynamides**

Tae-Woong Um,<sup>a,b</sup> Hyun-Suk Yeom,<sup>b</sup> and Seunghoon Shin\*<sup>a</sup>

<sup>a</sup> *Department of Chemistry, Research Institute of Natural Sciences and Center for New Directions in Organic Synthesis (CNOS), Hanyang University, 222 Wangsimni-ro, Seongdong-gu, Seoul 04763, Korea.*

<sup>b</sup> *Eco-Friendly New Materials Research Center, Therapeutics & Biotechnology Division, Korea Research Institute of Chemical Technology (KRICT), 141 Gajeong-ro, Yuseong-gu, Daejeon, 34114, Korea.*

[sshin@hanyang.ac.kr](mailto:sshin@hanyang.ac.kr)

**Table of Contents**

|                                                                |     |
|----------------------------------------------------------------|-----|
| 1. General Information-----                                    | S2  |
| 2. Optimization Study-----                                     | S3  |
| 3. General Procedure-----                                      | S11 |
| 4. Characterization of Substrates-----                         | S13 |
| 5. Synthetic Applications-----                                 | S38 |
| Appendix: Copies of <sup>1</sup> H and <sup>13</sup> C spectra |     |

## 1. General Information

All solvents were dried and distilled according to standard methods before use.<sup>1</sup> All the chemicals used for the synthesis of substrates were commercially available from Tokyo Chemical Industry, Sigma Aldrich and Alfa Aesar and were used as received, unless otherwise noted. TLC (thin-layer chromatography) analyses were carried out on Merck silica gel 60 F254 TLC plates and was visualized with UV lamp, phosphomolybdic acid and KMnO<sub>4</sub> solution. Flash chromatography was performed on Kieselgel 60 (230-400 mesh). <sup>1</sup>H and <sup>13</sup>C NMR spectra were recorded on a Bruker (400 MHz) spectrometer with TMS as an internal standard. High-resolution mass spectra (HRMS) were recorded on Bruker compact UHR-MS (QTOF) machine by ESI source in Organic Chemistry Research Center (OCRC) in Sogang University. Infrared Spectroscopy (IR) were recorded on a Bruker LUMOS FT-IR spectrometer equipped with a microscope and mercury cadmium telluride (MCT) detector.

## 2. Optimization Study

### 2.1. Oxidant screening (O-nucleophile)<sup>a</sup>

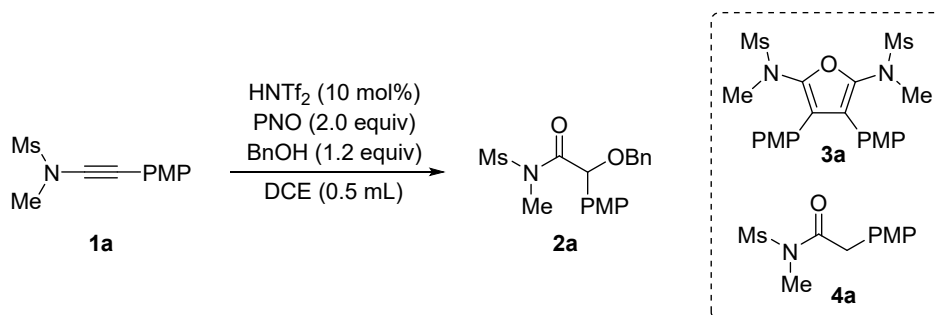

| entry | PNO                                                             | conditions | <b>2a</b> / <b>3a</b> / <b>4a</b> (%) <sup>b</sup> |
|-------|-----------------------------------------------------------------|------------|----------------------------------------------------|
| 1     | pyridine- <i>N</i> -oxide ( <b>PNO1</b> )                       | 60 °C, 1 h | No reaction                                        |
| 2     | quinolone- <i>N</i> -oxide ( <b>PNO2</b> )                      | 60 °C, 1 h | No reaction                                        |
| 3     | 2-Cl-pyridine- <i>N</i> -oxide ( <b>PNO3</b> )                  | 60 °C, 1 h | 59 / 17 / -                                        |
| 4     | 2,6-Cl <sub>2</sub> - pyridine- <i>N</i> -oxide ( <b>PNO4</b> ) | rt, 10 min | 65 / 34 / -                                        |
| 5     | 2,6-Br <sub>2</sub> - pyridine- <i>N</i> -oxide ( <b>PNO5</b> ) | rt, 10 min | 56 / 35 / -                                        |
| 6     | 2-CF <sub>3</sub> - pyridine- <i>N</i> -oxide ( <b>PNO6</b> )   | rt, 10 min | 47 / 29 / -                                        |
| 7     | 2-Me- pyridine- <i>N</i> -oxide ( <b>PNO7</b> )                 | 60 °C, 1 h | No reaction                                        |
| 8     | 2,6-Me <sub>2</sub> - pyridine- <i>N</i> -oxide ( <b>PNO8</b> ) | 60 °C, 1 h | No reaction                                        |

<sup>a</sup>**1a** (0.05 mmol) used. <sup>b</sup>Yield was determined by <sup>1</sup>H NMR using CH<sub>2</sub>Br<sub>2</sub> as the internal standard.

### 2.2. Variation of the equivalents (O-nucleophile)

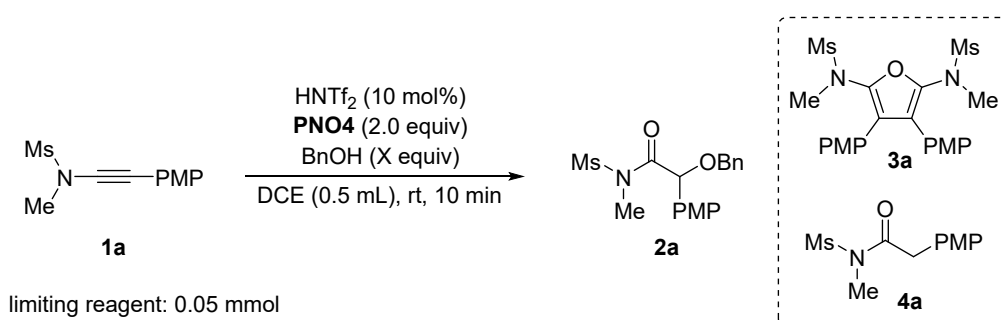

| entry | BnOH (X equiv) | <b>2a</b> / <b>3a</b> / <b>4a</b> (%) <sup>a</sup> |
|-------|----------------|----------------------------------------------------|
| 1     | 1.2            | 61 / 29 / -                                        |
| 2     | 2              | 67 / 20 / -                                        |
| 3     | 3              | 69 / 15 / -                                        |

|   |    |             |
|---|----|-------------|
| 4 | 5  | 74 / 11 / - |
| 5 | 10 | 70 / 6 / -  |

<sup>a</sup>Yield was determined by <sup>1</sup>H NMR using CH<sub>2</sub>Br<sub>2</sub> as the internal standard

### 2.3. Variation of the solvents (O-nucleophile)<sup>a</sup>

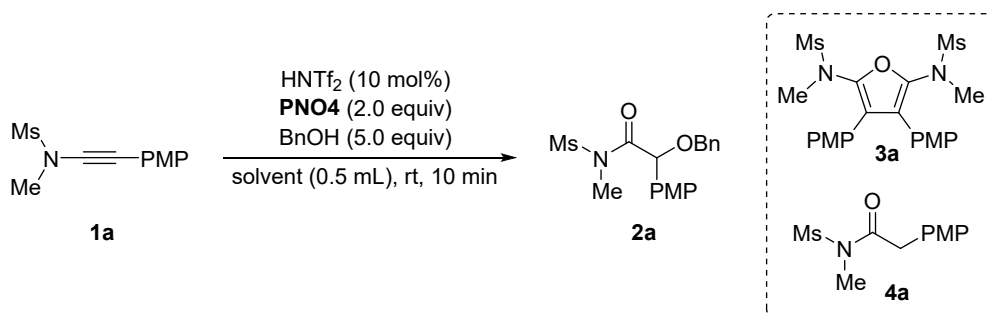

| entry | solvent                         | <b>2a</b> / <b>3a</b> / <b>4a</b><br>(%) <sup>b</sup> |
|-------|---------------------------------|-------------------------------------------------------|
| 1     | DCE                             | 76 / 10 / -                                           |
| 2     | DCM                             | 77 / 10 / 10                                          |
| 3     | CHCl <sub>3</sub>               | 73 / 7 / 15                                           |
| 4     | Et <sub>2</sub> O               | 43 / 14 / 20                                          |
| 5     | MTBE                            | 48 / 26 / 26                                          |
| 6     | THF                             | 67 / 15 / 19                                          |
| 7     | 1,4-dioxane                     | 64 / 8 / 7                                            |
| 8     | toluene                         | 68 / 7 / 20                                           |
| 9     | <i>m</i> -xylene                | 64 / 8 / 20                                           |
| 10    | mesitylene                      | 64 / 7 / 20                                           |
| 11    | Ph-CF <sub>3</sub>              | 76 / 5 / 19                                           |
| 12    | HFIP                            | 16 / 67 / -                                           |
| 13    | TFE                             | 25 / 52 / 8                                           |
| 14    | CH <sub>3</sub> NO <sub>2</sub> | 42 / 57 / 7                                           |
| 15    | DMF                             | S.M decomposed                                        |
| 16    | DMSO                            | S.M decomposed                                        |
| 17    | H <sub>2</sub> O                | S.M decomposed                                        |

<sup>a</sup>**1a** (0.05 mmol) used. <sup>b</sup>Yield was determined by <sup>1</sup>H NMR using CH<sub>2</sub>Br<sub>2</sub> as the internal standard.

## 2.4. Additive screening (O-nucleophile)<sup>a</sup>

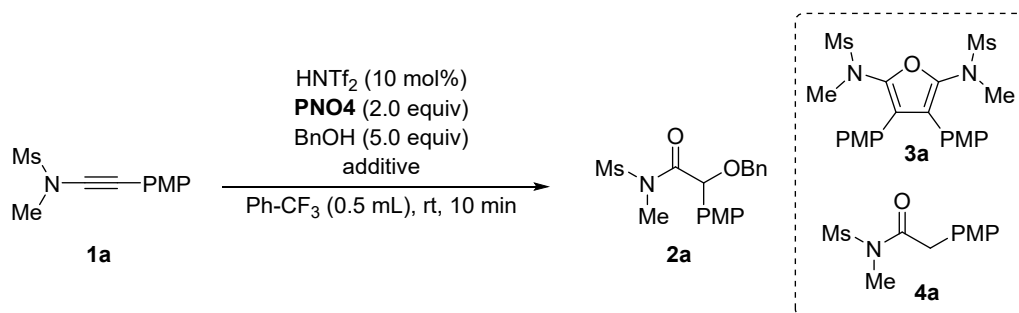

| entry | additive                   | <b>2a</b> / <b>3a</b> / <b>4a</b> (%) <sup>b</sup> |
|-------|----------------------------|----------------------------------------------------|
| 1     | -                          | 76 / 5 / 19                                        |
| 2     | 4 Å M.S (100 mg)           | 40 - / -                                           |
| 3     | 4 Å M.S (100 mg)           | 23 - / -                                           |
| 4     | 5 Å M.S (50 mg)            | 74 / 5 / 4                                         |
| 5     | 5 Å M.S (100 mg)           | 83 / 5 / 5                                         |
| 6     | 5 Å M.S (200 mg)           | 84 (83) / 4 / 6 <sup>c</sup>                       |
| 7     | MgSO <sub>4</sub> (100 mg) | 70 / - / 24                                        |

<sup>a</sup>**1a** (0.05 mmol) used. <sup>b</sup>Yield was determined by <sup>1</sup>H NMR using CH<sub>2</sub>Br<sub>2</sub> as the internal standard.

<sup>c</sup>Isolated yield in parenthesis.

## 2.5. Variation of the amount of catalyst loading (O-nucleophile)<sup>a</sup>

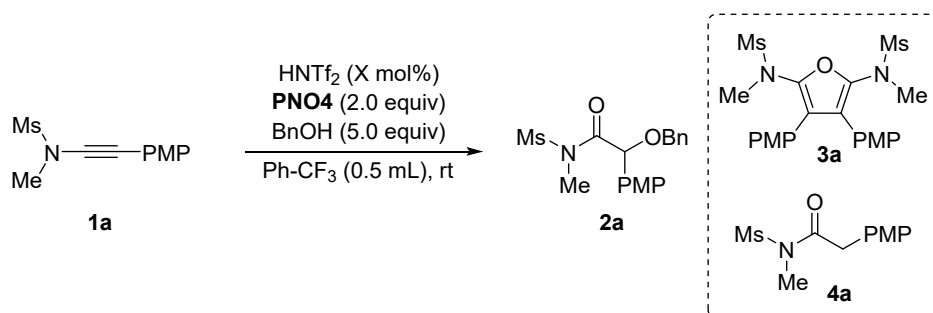

| entry | HNTf <sub>2</sub> (mol%) | time   | <b>2a</b> / <b>3a</b> / <b>4a</b> (%) <sup>b</sup> |
|-------|--------------------------|--------|----------------------------------------------------|
| 1     | 10                       | 10 min | 75 / 5 / 15                                        |
| 2     | 5                        | 30 min | 76 / 5 / 18                                        |
| 3     | 2.5                      | 30 min | 74 / 5 / 15                                        |
| 4     | 1                        | 1 h    | 64 / 6 / 12                                        |

<sup>a</sup>**1a** (0.05 mmol) used. <sup>b</sup>Yield was determined by <sup>1</sup>H NMR using CH<sub>2</sub>Br<sub>2</sub> as the internal standard.

## 2.6. Variation of the amount of 2,6-Cl<sub>2</sub>-pyridine-*N*-oxide PNO4 (O-nucleophile)<sup>a,b</sup>

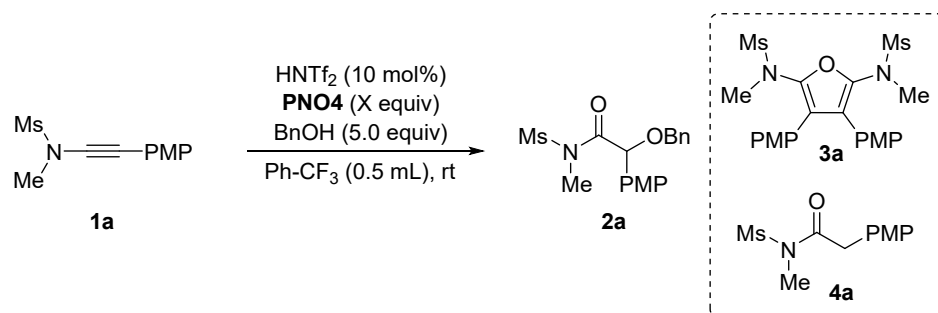

| entry | PNO4 (equiv) | time   | 2a / 3a / 4a (%) <sup>c</sup> |
|-------|--------------|--------|-------------------------------|
| 1     | 2            | 10 min | 81 / 8 / 7                    |
| 2     | 1.5          | 10 min | 79 / 13 / 6                   |
| 3     | 1.2          | 10 min | 72 / 18 / 7                   |

<sup>a</sup>1a (0.05 mmol) used. <sup>b</sup>5 Å molecular sieve was used. <sup>c</sup>Yield was determined by <sup>1</sup>H NMR using CH<sub>2</sub>Br<sub>2</sub> as the internal standard.

## 2.7. Oxidant screening (S-nucleophile)<sup>a</sup>

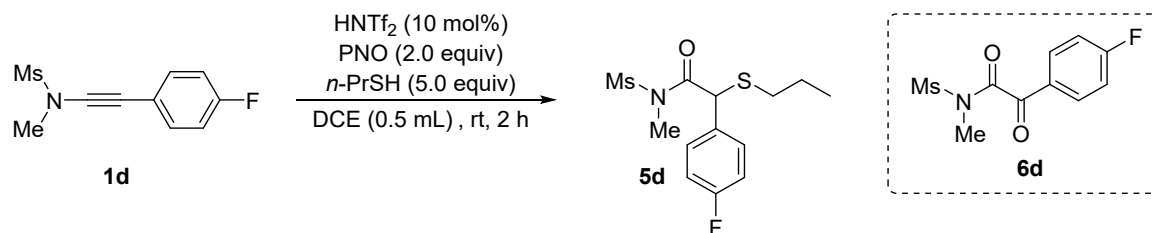

| entry | PNO                                                   | 5d / 6d (%) <sup>b</sup> |
|-------|-------------------------------------------------------|--------------------------|
| 1     | quinolone- <i>N</i> -oxide (PNO2)                     | 10 / -                   |
| 2     | 2-Cl-pyridine- <i>N</i> -oxide (PNO3)                 | 5 / 13                   |
| 3     | 2,6-Cl <sub>2</sub> -pyridine- <i>N</i> -oxide (PNO4) | 58 / 23                  |
| 4     | 2,6-Cl <sub>2</sub> -pyridine- <i>N</i> -oxide (PNO4) | 57 / 19                  |
| 5     | 2,6-Br <sub>2</sub> -pyridine- <i>N</i> -oxide (PNO5) | 45 / 28                  |
| 6     | 3,5-Cl <sub>2</sub> -pyridine- <i>N</i> -oxide (PNO9) | No reaction              |

<sup>a</sup>1d (0.05 mmol) used. <sup>b</sup>Yield was determined by <sup>1</sup>H NMR using CH<sub>2</sub>Br<sub>2</sub> as the internal standard.

## 2.8. Brønsted acid catalyst screening (S-nucleophile)<sup>a</sup>

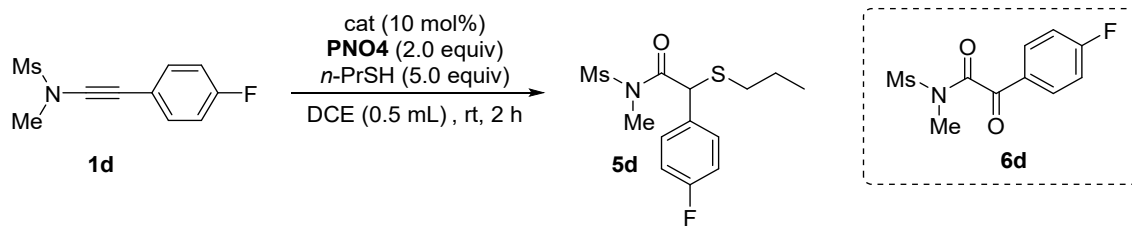

| entry | catalyst                                                                          | <b>5d</b> / <b>6d</b> (%) <sup>b</sup> |
|-------|-----------------------------------------------------------------------------------|----------------------------------------|
| 1     | HNTf <sub>2</sub>                                                                 | 59 / 20                                |
| 2     | TfOH                                                                              | 49 / 28                                |
| 3     | 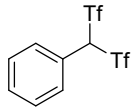 | 55 / 30                                |
| 4     |  | 45 / 24                                |

<sup>a</sup>**1d** (0.05 mmol) used. <sup>b</sup>Yield was determined by <sup>1</sup>H NMR using CH<sub>2</sub>Br<sub>2</sub> as the internal standard.

## 2.9. Variation of the equivalents (S-nucleophile)<sup>a</sup>

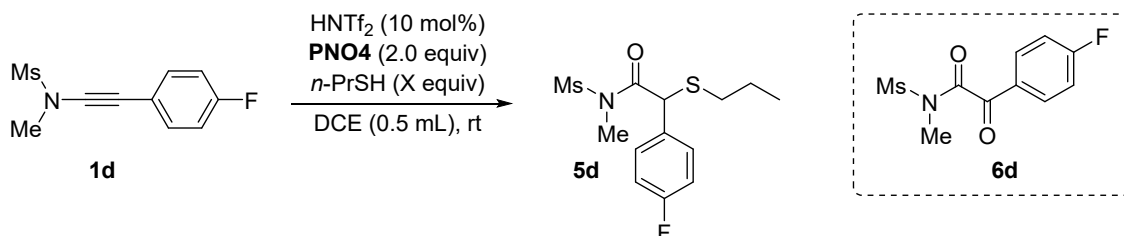

| entry | <i>n</i> -PrSH (equiv) | time | <b>5d</b> / <b>6d</b> (%) <sup>b</sup> |
|-------|------------------------|------|----------------------------------------|
| 1     | 1.2                    | 6 h  | 46 / 10                                |
| 2     | 2.0                    | 2 h  | 53 / 13                                |
| 3     | 3.0                    | 2 h  | 53 / 15                                |
| 4     | 5.0                    | 2 h  | 56 / 18                                |

<sup>a</sup>**1d** (0.05 mmol) used. <sup>b</sup>Yield was determined by <sup>1</sup>H NMR using CH<sub>2</sub>Br<sub>2</sub> as the internal standard.

## 2.10. Solvent concentration screening (S-nucleophile)<sup>a</sup>

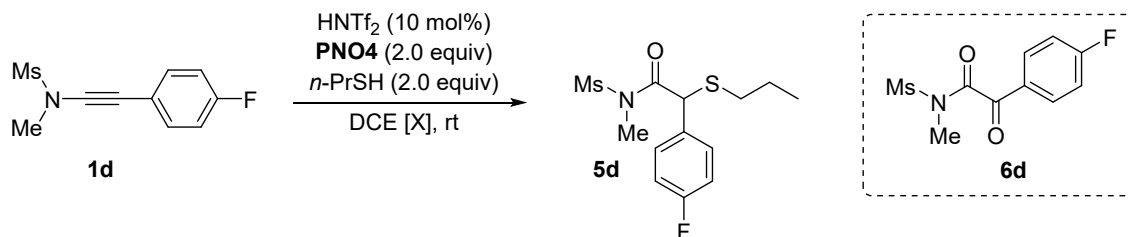

| entry | DCE (vol)        | time | <b>5d</b> / <b>6d</b> (%) <sup>b</sup> |
|-------|------------------|------|----------------------------------------|
| 1     | 0.1 M (0.5 mL)   | 2 h  | 53 / 20                                |
| 2     | 0.05 M (1.0 mL)  | 2 h  | 47 / 10                                |
| 3     | 0.025 M (2.0 mL) | 2 h  | 51 / 10                                |

<sup>a</sup>**1d** (0.05 mmol) used. <sup>b</sup>Yield was determined by <sup>1</sup>H NMR using CH<sub>2</sub>Br<sub>2</sub> as the internal standard.

## 2.11. H<sub>2</sub>O solvent effect (S-nucleophile)<sup>a</sup>

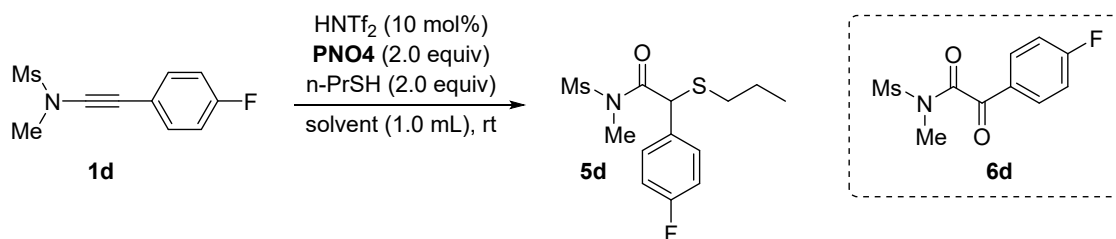

| entry | solvent                             | time | <b>5d</b> / <b>6d</b> (%) <sup>b</sup> |
|-------|-------------------------------------|------|----------------------------------------|
| 1     | DCE                                 | 2 h  | 57 / 10                                |
| 2     | DCE/H <sub>2</sub> O (0.5 mL/0.5mL) | 2 h  | 42 / 7                                 |
| 3     | H <sub>2</sub> O                    | 2 h  | 32 / 2                                 |

<sup>a</sup>**1d** (0.05 mmol) used. <sup>b</sup>Yield was determined by <sup>1</sup>H NMR using CH<sub>2</sub>Br<sub>2</sub> as the internal standard.



### 2.12. Temperature effect (S-nucleophile)<sup>a</sup>

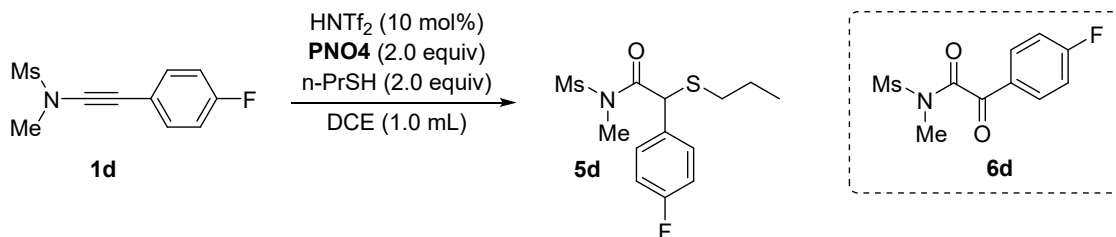

| entry | Temp  | time | <b>5d</b> / <b>6d</b><br>(%) <sup>b</sup> |
|-------|-------|------|-------------------------------------------|
| 1     | 0 °C  | 5 h  | 26 / 47                                   |
| 2     | rt    | 2 h  | 47 / 10                                   |
| 3     | 40 °C | 2 h  | 51 / 7                                    |
| 4     | 60 °C | 2 h  | 82 / 2                                    |

<sup>a</sup>**1d** (0.05 mmol) used. <sup>b</sup>Yield was determined by <sup>1</sup>H NMR using CH<sub>2</sub>Br<sub>2</sub> as the internal standard.

### 2.13. Solvent and equivalent screening (N-nucleophile)<sup>a</sup>

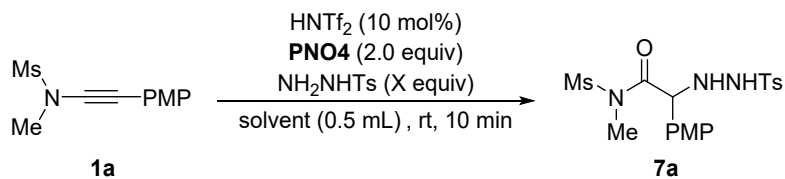

| entry | solvent            | NH <sub>2</sub> NHTs (equiv) | <b>7a</b> (%) <sup>b</sup> |
|-------|--------------------|------------------------------|----------------------------|
| 1     | Ph-CF <sub>3</sub> | 1.2                          | 17                         |
| 2     | DCE                | 1.2                          | 74                         |
| 3     | DCE                | 2                            | 81                         |
| 4     | DCE                | 3                            | 74                         |
| 5     | DCE                | 5                            | 57                         |

<sup>a</sup>**1a** (0.05 mmol) used. <sup>b</sup>Yield was determined by <sup>1</sup>H NMR using CH<sub>2</sub>Br<sub>2</sub> as the internal standard.

## 2.14. Temperature effect (N-nucleophile)<sup>a</sup>

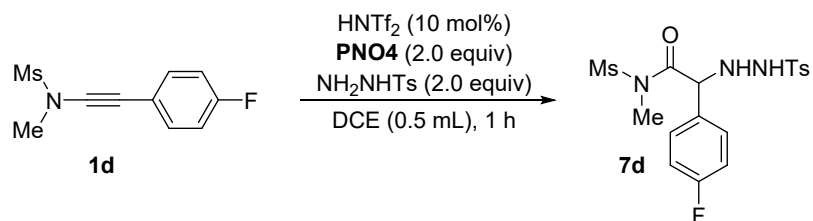

| entry | Temp  | <b>7d</b> (%) <sup>b</sup> |
|-------|-------|----------------------------|
| 1     | rt    | 31                         |
| 2     | 60 °C | 62                         |
| 3     | 80 °C | 55                         |

<sup>a</sup>**1d** (0.05 mmol) used. <sup>b</sup>Yield was determined by <sup>1</sup>H NMR using CH<sub>2</sub>Br<sub>2</sub> as the internal standard.

### 3. General Procedure

#### 3.1. Representative procedure for the synthesis of **2a**

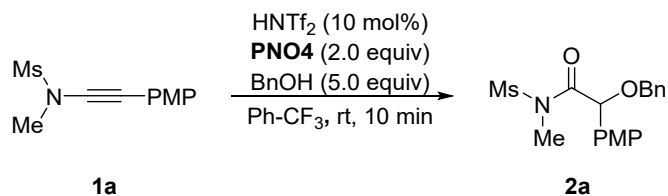

In a 4 mL vial, ynamide **1a** (23.9 mg, 0.10 mmol), 2,6-dichloropyridine-N-oxide **PNO4** (32.8 mg, 0.20 mmol) and benzyl alcohol (54.1 mg, 0.50 mmol) was dissolved in trifluoromethyl benzene (1.0 mL) at room temperature. To this mixture was added HNTf<sub>2</sub> (2.8 mg, 0.01 mmol) and was capped under air. The resulting mixture was stirred at room temperature until TLC indicated complete consumption (usually 10 minutes). The reaction mixture was poured onto a silica gel column and was eluted with EtOAc:Hex (1:4~1:2) to yield 30.6 mg (83%) of **2a** as a sticky colorless oil.

#### 3.2. Representative procedure for the synthesis of **5a**

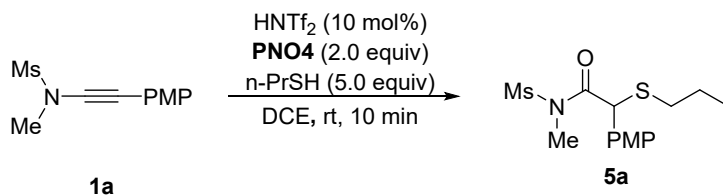

In a 4 mL vial, ynamide **1a** (23.9 mg, 0.10 mmol), 2,6-dichloropyridine-N-oxide **PNO4** (32.8 mg, 0.20 mmol) and propyl mercaptan (15.2 mg, 0.20 mmol) was dissolved in 1,2-dichloroethane (1.0 mL) at room temperature. To this mixture was added HNTf<sub>2</sub> (2.8 mg, 0.01 mmol) and was capped under air. The resulting mixture was stirred at room temperature until TLC indicated complete consumption (usually 10 minutes). The reaction mixture was poured onto a silica gel column and was eluted with EtOAc:Hex (1:4~1:2) to yield 30.6 mg (92%) of **5a** as a sticky colorless oil.

### 3.3. Representative procedure for the synthesis of **7a**

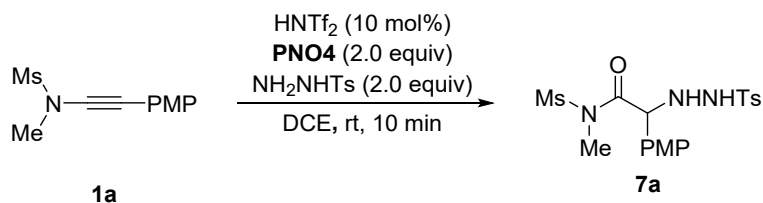

In a 4 mL vial, ynamide **1a** (23.9 mg, 0.10 mmol), 2,6-dichloropyridine-N-oxide **PNO4** (32.8 mg, 0.20 mmol) and *p*-toluenesulfonyl hydrazide (37.2 mg, 0.20 mmol) was dissolved in 1,2-dichloroethane (1.0 mL) at room temperature. To this mixture was added HNTf<sub>2</sub> (2.8 mg, 0.01 mmol) and was capped under air. The resulting mixture was stirred at room temperature until TLC indicated complete consumption (usually 10 minutes). The reaction mixture was poured onto a silica gel column and was eluted with EtOAc:Hex (1:4~1:1) to yield 37.0 mg (84%) of **7a** as a white solid.

#### 4. Characterization of Substrates

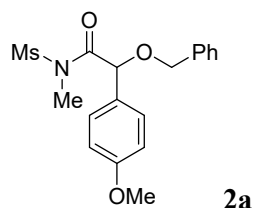

Sticky colorless oil (30.6 mg, 83%, EtOAc:Hex = 1:3); **<sup>1</sup>H NMR** (400 MHz, CDCl<sub>3</sub>): δ 7.42-7.27 (m, 7H), 6.93 (d, *J* = 8.6 Hz, 2H), 5.49 (s, 1H), 4.58 (d of ABq, *J* = 11.8 Hz, 1H), 4.55 (d of ABq, *J* = 11.6 Hz, 1 H), 3.82 (s, 3H), 3.16 (s, 3H), 2.96 (s, 3H); **<sup>13</sup>C NMR** (100 MHz, CDCl<sub>3</sub>): δ 171.3, 160.2, 137.0, 129.6, 128.6, 128.4, 128.2, 126.7, 114.4, 80.2, 71.6, 55.3, 40.8, 32.6; **IR** (ATR):  $\tilde{\nu}$  = 3025, 2940, 2338, 1702, 1609, 1512, 1455, 1349, 1249, 1165, 1067, 965, 700 cm<sup>-1</sup>; **HRMS** (ESI) *m/z*: [M+Na]<sup>+</sup> Calcd for C<sub>18</sub>H<sub>21</sub>NNaO<sub>5</sub>S<sup>+</sup> 386.1033, found 386.1038.

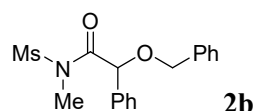

Sticky colorless oil (23.0 mg, 70%, EtOAc:Hex = 1:3); **<sup>1</sup>H NMR** (400 MHz, CDCl<sub>3</sub>): δ 7.51-7.27 (m, 10H), 5.54 (s, 1H), 4.61 (d of ABq, *J* = 11.4 Hz, 1H), 4.58 (d of ABq, *J* = 11.4 Hz, 1H), 3.16 (s, 3H), 2.98 (s, 3H); **<sup>13</sup>C NMR** (100 MHz, CDCl<sub>3</sub>): δ 171.2, 136.9, 134.8, 129.2, 129.0, 128.6, 128.4, 128.2, 128.0, 81.0, 72.0, 40.8, 32.6; **IR** (ATR):  $\tilde{\nu}$  = 2989, 2320, 1705, 1352, 1275, 1161, 971, 764 cm<sup>-1</sup>; **HRMS** (ESI) *m/z*: [M+Na]<sup>+</sup> Calcd for C<sub>17</sub>H<sub>19</sub>NNaO<sub>4</sub>S<sup>+</sup> 356.0927, found 356.0933.

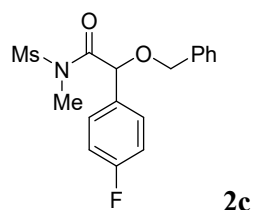

Sticky colorless oil (22.3mg, 64%, EtOAc:Hex = 1:3); **<sup>1</sup>H NMR** (400 MHz, CDCl<sub>3</sub>): δ 7.42 (dd, *J* = 7.6, 5.4 Hz, 2H), 7.39-7.29 (m, 5H), 7.10 (t, *J* = 8.6 Hz, 2H), 5.56 (s, 1H), 4.58 (d of ABq, *J* = 11.4 Hz, 1H), 4.54 (d of ABq, *J* = 11.4 Hz, 1H), 3.17 (s, 3H), 2.99 (s, 3H); **<sup>13</sup>C NMR** (100 MHz, CDCl<sub>3</sub>): δ 170.9, 163.1 (d, *J* = 247.2 Hz), 136.7, 130.8 (d, *J* = 3.4 Hz), 130.0 (d, *J* = 8.2 Hz), 128.6, 128.43, 128.36, 115.9 (d, *J* = 21.7 Hz), 80.2, 72.0, 40.9, 32.7; **IR** (ATR):  $\tilde{\nu}$  = 3009, 2334, 1701, 1604, 1509, 1352, 1260,

1157, 1068, 964, 835  $\text{cm}^{-1}$ ; **HRMS** (ESI)  $m/z$ :  $[M+\text{Na}]^+$  Calcd for  $\text{C}_{17}\text{H}_{18}\text{FNNaO}_4\text{S}^+$  374.0833, found 374.0834.

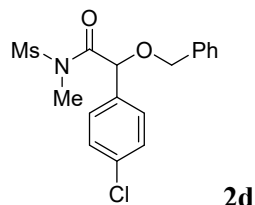

Sticky colorless oil (26.9 mg, 73%, EtOAc:Hex = 1:3);  **$^1\text{H}$  NMR** (400 MHz,  $\text{CDCl}_3$ ):  $\delta$  7.43-7.28 (m, 9H), 5.55 (s, 1H), 4.58 (d of ABq,  $J = 11.4$  Hz, 1H), 4.54 (d of ABq,  $J = 11.4$  Hz, 1H), 3.17 (s, 3H), 3.00 (s, 3H);  **$^{13}\text{C}$  NMR** (100 MHz,  $\text{CDCl}_3$ ):  $\delta$  170.7, 136.6, 135.1, 133.5, 129.4, 129.1, 128.7, 128.5, 128.4, 80.3, 72.1, 40.9, 32.7; **IR** (ATR):  $\tilde{\nu} = 3002, 2348, 1702, 1491, 1351, 1157, 1088, 964, 823, 699$   $\text{cm}^{-1}$ ; **HRMS** (ESI)  $m/z$ :  $[M+\text{Na}]^+$  Calcd for  $\text{C}_{17}\text{H}_{18}\text{ClNNaO}_4\text{S}^+$  390.0537, found 390.0535.

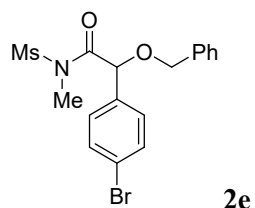

Sticky colorless oil (29.5 mg, 72%, EtOAc:Hex = 1:3);  **$^1\text{H}$  NMR** (400 MHz,  $\text{CDCl}_3$ ):  $\delta$  7.55 (d,  $J = 8.4$  Hz, 2H), 7.44-7.27 (m, 7H), 5.53 (s, 1H), 4.57 (d of ABq,  $J = 11.2$  Hz, 1H), 4.54 (d of ABq,  $J = 11.2$  Hz, 1H), 3.17 (s, 3H), 3.00 (s, 3H);  **$^{13}\text{C}$  NMR** (100 MHz,  $\text{CDCl}_3$ ):  $\delta$  170.6, 136.6, 134.1, 132.1, 129.7, 128.7, 128.5, 128.4, 123.3, 80.4, 72.1, 40.9, 32.7; **IR** (ATR):  $\tilde{\nu} = 3002, 2945, 2338, 1700, 1488, 1352, 1275, 1166, 1070, 964, 801, 750$   $\text{cm}^{-1}$ ; **HRMS** (ESI)  $m/z$ :  $[M+\text{Na}]^+$  Calcd for  $\text{C}_{17}\text{H}_{18}\text{BrNNaO}_4\text{S}^+$  434.0032, found 434.0030.

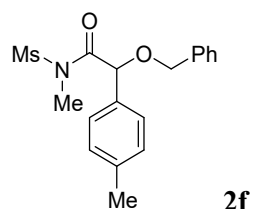

Sticky colorless oil (24.0 mg, 69%, EtOAc:Hex = 1:3); **<sup>1</sup>H NMR** (400 MHz, CDCl<sub>3</sub>): δ 7.40-7.34 (m, 4H), 7.34-7.28 (m, 3H), 7.22 (d, *J* = 8.0 Hz, 2H), 5.50 (s, 1H), 4.60 (d of ABq, *J* = 12.0 Hz, 1H), 4.57 (d of ABq, *J* = 11.6 Hz, 1H), 3.16 (s, 3H), 2.98 (s, 3H), 2.37 (s, 3H); **<sup>13</sup>C NMR** (100 MHz, CDCl<sub>3</sub>): δ 171.3, 139.1, 137.0, 131.7, 129.7, 128.6, 128.4, 128.2, 128.0, 80.7, 71.8, 40.9, 32.6, 21.3; **IR** (ATR):  $\tilde{\nu}$  = 3027, 2926, 2332, 1702, 1348, 1164, 1066, 963 cm<sup>-1</sup>; **HRMS** (ESI) *m/z*: [M+Na]<sup>+</sup> Calcd for C<sub>18</sub>H<sub>21</sub>NNaO<sub>4</sub>S<sup>+</sup> 370.1084, found 370.1082.

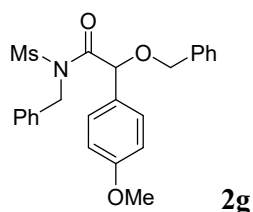

Sticky colorless oil (42.0 mg, 95%, EtOAc:Hex = 1:3); **<sup>1</sup>H NMR** (400 MHz, CDCl<sub>3</sub>): δ 7.4 5-7.11 (m, 12H), 6.90 (d, *J* = 8.7 Hz, 2H), 5.42 (s, 1H), 4.97 (d of ABq, *J* = 16.3 Hz, 1H), 4.85 (d of ABq, *J* = 16.3 Hz, 1H), 4.47 (d of ABq, *J* = 11.6 Hz, 1H), 4.42 (d of ABq, *J* = 11.6 Hz, 1H), 3.80 (s, 3H), 2.82 (s, 3H); **<sup>13</sup>C NMR** (100 MHz, CDCl<sub>3</sub>): δ 171.5, 160.4, 137.0, 136.0, 130.1, 128.9, 128.5, 128.4, 128.1, 128.0, 127.5, 126.7, 114.4, 79.4, 71.3, 55.4, 48.8, 42.4; **IR** (ATR):  $\tilde{\nu}$  = 2936, 2496, 1701, 1610, 1512, 1347, 1246, 1164, 1063, 1030, 963 cm<sup>-1</sup>; **HRMS** (ESI) *m/z*: [M+Na]<sup>+</sup> Calcd for C<sub>24</sub>H<sub>25</sub>NNaO<sub>5</sub>S<sup>+</sup> 462.1346, found 462.1345.

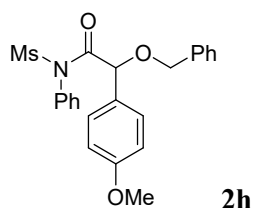

Sticky yellow oil (32.4 mg, 76%, EtOAc:Hex = 1:3); **<sup>1</sup>H NMR** (400 MHz, CDCl<sub>3</sub>): δ 7.42 (t, *J* = 7.5 Hz, 1H), 7.37-7.25 (m, 7H), 6.98 (d, *J* = 8.7 Hz, 2H), 6.89 (d, *J* = 7.6 Hz, 2H), 6.84 (d, *J* = 8.7 Hz, 2H), 4.67 (s, 1H), 4.52 (d of ABq, *J* = 11.8 Hz, 1H), 4.39 (d of ABq, *J* = 11.8 Hz, 1H), 3.83 (s, 3H), 3.46 (s, 3H); **<sup>13</sup>C NMR** (100 MHz, CDCl<sub>3</sub>): δ 171.3, 160.4, 137.0, 133.9, 130.4, 130.1, 130.0, 129.5, 128.5, 128.3, 128.1, 126.3, 114.2, 78.4, 70.8, 55.3, 42.1; **IR** (ATR):  $\tilde{\nu}$  = 3043, 2926, 2312, 1709, 1609, 1512, 1454, 1354, 1248, 1153, 1075, 964 cm<sup>-1</sup>; **HRMS** (ESI) *m/z*: [M+Na]<sup>+</sup> Calcd for C<sub>23</sub>H<sub>23</sub>NNaO<sub>5</sub>S<sup>+</sup> 448.1189, found 448.1185.

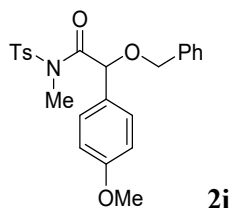

Sticky colorless oil (31.9 mg, 72%, EtOAc:Hex = 1:3); **<sup>1</sup>H NMR** (400 MHz, CDCl<sub>3</sub>): δ **<sup>1</sup>H NMR** (400 MHz, CDCl<sub>3</sub>): 7.59 (d, *J* = 8.3 Hz, 2H), 7.42-7.30 (m, 5H), 7.30-7.20 (m, 4H), 6.88 (d, *J* = 8.7 Hz, 2H), 5.59 (s, 1H), 4.54 (d of ABq, *J* = 11.9 Hz, 1H), 4.50 (d of ABq, *J* = 11.2 Hz, 1H), 3.84 (s, 3H), 3.15 (s, 3H), 2.45 (s, 3H); **<sup>13</sup>C NMR** (100 MHz, CDCl<sub>3</sub>): δ 170.9, 160.1, 144.9, 137.2, 135.4, 129.6, 128.5, 128.2, 128.0, 127.9, 127.0, 114.2, 79.7, 71.2, 55.4, 33.0, 21.7; **IR** (ATR):  $\tilde{\nu}$  = 2987, 2368, 1699, 1611, 1517, 1355, 1275, 1267, 1169, 1056, 750 cm<sup>-1</sup>; **HRMS** (ESI) *m/z*: [M+Na]<sup>+</sup> Calcd for C<sub>24</sub>H<sub>25</sub>NNaO<sub>5</sub>S<sup>+</sup> 462.1346, found 462.1351.

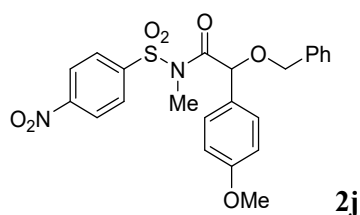

Yellow solid (22.1 mg, 47%, EtOAc:Hex = 1:3); **<sup>1</sup>H NMR** (400 MHz, CDCl<sub>3</sub>): 8.27 (d, *J* = 8.9 Hz, 2H), 7.95 (d, *J* = 8.9 Hz, 2H), 7.42-7.32 (m, 3H), 7.30 (d, *J* = 9.9 Hz, 2H), 7.20 (d, *J* = 8.7 Hz, 2H), 6.88 (d, *J* = 8.7 Hz, 2H), 5.36 (s, 1H), 4.55 (d of ABq, *J* = 12.1 Hz, 1H), 4.51 (d of ABq, *J* = 11.2 Hz, 1H), 3.83 (s, 3H), 3.24 (s, 3H); **<sup>13</sup>C NMR** (100 MHz, CDCl<sub>3</sub>): δ 170.7, 160.3, 150.5, 144.1, 136.7, 129.43, 129.36, 128.6, 128.2, 126.0, 124.0, 114.4, 79.9, 71.3, 55.4, 33.1; **IR** (ATR):  $\tilde{\nu}$  = 3101, 3020, 2349, 1709, 1511, 1530, 1348, 1250, 1174, 1028, 1061, 763 cm<sup>-1</sup>; **HRMS** (ESI) *m/z*: [M+Na]<sup>+</sup> Calcd for C<sub>23</sub>H<sub>22</sub>N<sub>2</sub>NaO<sub>7</sub>S<sup>+</sup> 493.1040, found 493.1037.

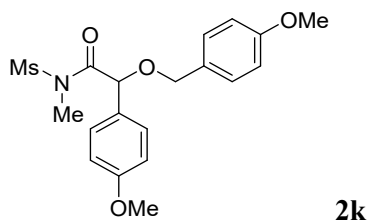

Sticky colorless oil (29.4 mg, 75%, EtOAc:Hex = 1:3); **<sup>1</sup>H NMR** (400 MHz, CDCl<sub>3</sub>): δ 7.33 (d, *J* = 8.5 Hz, 2H), 7.27 (d, *J* = 8.4 Hz, 2H), 6.93 (d, *J* = 8.4 Hz, 2H), 6.88 (d, *J* = 8.3 Hz, 2H), 5.45 (s, 1H), 4.49



(s, 2H), 3.82 (s, 3H), 3.80 (s, 3H), 3.15 (s, 3H), 2.98 (s, 3H);  $^{13}\text{C NMR}$  (100 MHz,  $\text{CDCl}_3$ ):  $\delta$  171.4, 160.2, 159.6, 130.1, 129.6, 129.0, 126.8, 114.3, 113.9, 79.9, 71.3, 55.34, 55.30, 40.9, 32.6; **IR** (ATR):  $\tilde{\nu}$  = 2992, 2349, 1701, 1611, 1513, 1350, 1255, 1167, 1031, 964, 828  $\text{cm}^{-1}$ ; **HRMS** (ESI)  $m/z$ :  $[\text{M}+\text{Na}]^+$  Calcd for  $\text{C}_{19}\text{H}_{23}\text{NNaO}_6\text{S}^+$  416.1138, found 416.1134.

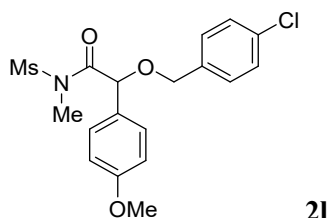

Sticky colorless oil (32.4 mg, 81%, EtOAc:Hex = 1:3);  $^1\text{H NMR}$  (400 MHz,  $\text{CDCl}_3$ ):  $\delta$  7.49-7.20 (m, 6H), 6.93 (d,  $J$  = 8.6 Hz, 2H), 5.51 (s, 1H), 4.54 (d of ABq,  $J$  = 11.5 Hz, 1H), 4.49 (d of ABq,  $J$  = 11.5 Hz, 1H), 3.82 (s, 3H), 3.17 (s, 3H), 2.94 (s, 3H);  $^{13}\text{C NMR}$  (100 MHz,  $\text{CDCl}_3$ ):  $\delta$  171.2, 160.4, 135.6, 133.9, 129.8, 129.6, 128.7, 126.5, 114.4, 80.2, 70.7, 55.4, 40.8, 32.6; **IR** (ATR):  $\tilde{\nu}$  = 3013, 2934, 2340, 1701, 1609, 1512, 1350, 1252, 1165, 1030, 964, 829  $\text{cm}^{-1}$ ; **HRMS** (ESI)  $m/z$ :  $[\text{M}+\text{Na}]^+$  Calcd for  $\text{C}_{18}\text{H}_{20}\text{ClNNaO}_5\text{S}^+$  420.0643, found 420.0650.

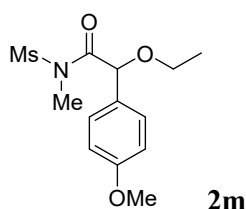

Sticky colorless oil (21.5 mg, 72%, EtOAc:Hex = 1:3);  $^1\text{H NMR}$  (400 MHz,  $\text{CDCl}_3$ ):  $\delta$  7.33 (d,  $J$  = 8.5 Hz, 2H), 6.92 (d,  $J$  = 8.5 Hz, 2H), 5.41 (s, 1H), 3.81 (s, 3H), 3.61 (quintet of ABq,  $J$  = 7.1 Hz, 1H), 3.52 (quintet of ABq,  $J$  = 7.1 Hz, 1H), 3.21 (s, 3H), 3.05 (s, 3H), 1.26 (t,  $J$  = 7.0 Hz, 3H);  $^{13}\text{C NMR}$  (100 MHz,  $\text{CDCl}_3$ ):  $\delta$  171.7, 160.1, 129.3, 127.0, 114.3, 81.3, 65.6, 55.3, 40.9, 32.5, 15.2; **IR** (ATR):  $\tilde{\nu}$  = 3004, 2990, 2348, 1613, 1517, 1463, 1365, 1275, 1167, 1037, 772  $\text{cm}^{-1}$ ; **HRMS** (ESI)  $m/z$ :  $[\text{M}+\text{Na}]^+$  Calcd for  $\text{C}_{13}\text{H}_{19}\text{NNaO}_5\text{S}^+$  324.0876, found 324.0869.

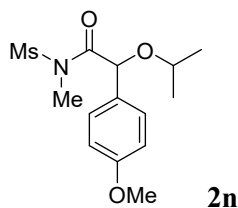

Sticky colorless oil (20.7 mg, 66%, EtOAc:Hex = 1:4); **<sup>1</sup>H NMR** (400 MHz, CDCl<sub>3</sub>): δ 7.33 (d, *J* = 8.8 Hz, 2H), 6.91 (d, *J* = 8.7 Hz, 2H), 5.50 (s, 1H), 3.81 (s, 3H), 3.73 (heptet, *J* = 6.1 Hz, 1H), 3.20 (s, 3H), 3.05 (s, 3H), 1.26 (d, *J* = 6.1 Hz, 3H), 1.21 (d, *J* = 6.1 Hz, 3H); **<sup>13</sup>C NMR** (100 MHz, CDCl<sub>3</sub>): δ 172.5, 160.0, 128.8, 127.4, 114.3, 79.4, 71.5, 55.3, 40.9, 32.5, 22.14, 22.11; **IR** (ATR):  $\tilde{\nu}$  = 2970, 2333, 1705, 1610, 1512, 1349, 1250, 1166, 1063, 965, 836, 774 cm<sup>-1</sup>; **HRMS** (ESI) *m/z*: [M+Na]<sup>+</sup> Calcd for C<sub>14</sub>H<sub>21</sub>NNaO<sub>5</sub>S<sup>+</sup> 338.1033, found 338.1035.

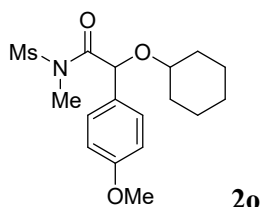

Sticky colorless oil (23.1 mg, 65%, EtOAc:Hex = 1:4); **<sup>1</sup>H NMR** (400 MHz, CDCl<sub>3</sub>): δ 7.33 (d, *J* = 8.0 Hz, 2H), 6.91 (d, *J* = 8.7 Hz, 2H), 5.53 (s, 1H), 3.81 (s, 3H), 3.55-3.35 (m, 1H), 3.19 (s, 3H), 3.05 (s, 3H), 2.10-1.81 (m, 2H), 1.82-1.65 (m, 2H), 1.59-1.46 (m, 1H), 1.46-1.32 (m, 2H), 1.32-1.12 (m, 3H); **<sup>13</sup>C NMR** (100 MHz, CDCl<sub>3</sub>): δ 172.7, 159.9, 128.5, 127.6, 114.3, 79.4, 77.7, 55.3, 40.9, 32.42, 32.36, 32.1, 25.6, 24.1; **HRMS** (ESI) *m/z*: [M+Na]<sup>+</sup> Calcd for C<sub>17</sub>H<sub>25</sub>NNaO<sub>5</sub>S<sup>+</sup> 378.1346, found 378.1350.

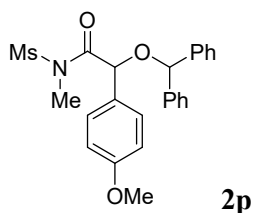

Sticky colorless oil (28.6 mg, 65%, EtOAc:Hex = 1:4); **<sup>1</sup>H NMR** (400 MHz, CDCl<sub>3</sub>): δ 7.48-7.18 (m, 12H), 6.91 (d, *J* = 8.8 Hz, 2H), 5.51 (s, 1H), 5.39 (s, 1H), 3.80 (s, 3H), 3.07 (s, 3H), 2.95 (s, 3H); **<sup>13</sup>C NMR** (100 MHz, CDCl<sub>3</sub>): δ 171.7, 160.2, 141.1, 140.8, 129.3, 128.6, 128.5, 127.9, 127.9, 127.7, 127.4, 126.7, 114.5, 82.1, 78.6, 55.4, 41.0, 32.3; **IR** (ATR):  $\tilde{\nu}$  = 3026, 2930, 1702, 1609, 1454, 1512,

1351, 1280, 1166, 1059, 963, 832, 767  $\text{cm}^{-1}$ ; **HRMS** (ESI)  $m/z$ :  $[\text{M}+\text{Na}]^+$  Calcd for  $\text{C}_{24}\text{H}_{25}\text{NNaO}_5\text{S}^+$  462.1346, found 462.1339.

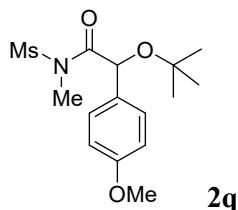

Sticky colorless oil (13.0 mg, 40%, EtOAc:Hex = 1:4);  **$^1\text{H NMR}$**  (400 MHz,  $\text{CDCl}_3$ ):  $\delta$  7.35 (d,  $J = 8.2$  Hz, 2H), 6.90 (d,  $J = 7.5$  Hz, 2H), 5.54 (s, 1H), 3.81 (s, 3H), 3.18 (s, 3H), 3.10 (s, 3H), 1.31 (s, 9H);  **$^{13}\text{C NMR}$**  (100 MHz,  $\text{CDCl}_3$ ):  $\delta$  174.2, 159.6, 128.4, 127.4, 114.3, 76.5, 76.1, 55.3, 40.9, 32.4, 28.0; **IR** (ATR):  $\tilde{\nu} = 2972, 2313, 1684, 1512, 1349, 1260, 1167, 1083, 749 \text{ cm}^{-1}$ ; **HRMS** (ESI)  $m/z$ :  $[\text{M}+\text{Na}]^+$  Calcd for  $\text{C}_{15}\text{H}_{23}\text{NNaO}_5\text{S}^+$  352.1189, found 352.1194.

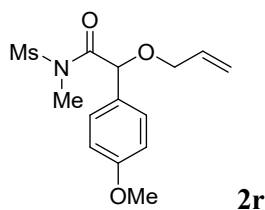

Sticky colorless oil (23.6 mg, 75%, EtOAc:Hex = 1:4);  **$^1\text{H NMR}$**  (400 MHz,  $\text{CDCl}_3$ ):  $\delta$  7.33 (d,  $J = 8.7$  Hz, 2H), 6.92 (d,  $J = 8.8$  Hz, 2H), 5.93 (ddt,  $J = 17.2, 10.4, 5.8$  Hz, 1H), 5.48 (s, 1H), 5.31 (ddt,  $J = 17.2, 1.6, 1.5$  Hz, 1H), 5.24 (ddt,  $J = 10.4, 1.4, 1.1$  Hz, 1H), 4.12-3.97 (m, 2H), 3.81 (s, 3H), 3.20 (s, 3H), 3.04 (s, 3H);  **$^{13}\text{C NMR}$**  (100 MHz,  $\text{CDCl}_3$ ):  $\delta$  171.4, 160.2, 133.7, 129.6, 126.7, 118.4, 114.3, 80.2, 70.6, 55.3, 40.8, 32.6; **IR** (ATR):  $\tilde{\nu} = 3013, 2928, 2846, 2320, 1704, 1610, 1513, 1350, 1254, 1165, 1064, 964, 829 \text{ cm}^{-1}$ ; **HRMS** (ESI)  $m/z$ :  $[\text{M}+\text{Na}]^+$  Calcd for  $\text{C}_{14}\text{H}_{19}\text{NNaO}_5\text{S}^+$  336.0876, found 336.0870.

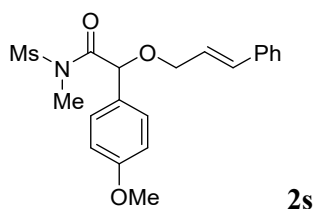

Sticky colorless oil (25.0 mg, 64%, EtOAc:Hex = 1:4); **<sup>1</sup>H NMR** (400 MHz, CDCl<sub>3</sub>): δ 7.47-7.22 (m, 7H), 6.93 (d, *J* = 8.7 Hz, 2H), 6.62 (d, *J* = 15.9 Hz, 1H), 6.29 (dt, *J* = 15.9, 6.3 Hz, 1H), 5.54 (s, 1H), 4.27-4.16 (m, 2H), 3.81 (s, 3H), 3.20 (s, 3H), 3.02 (s, 3H); **<sup>13</sup>C NMR** (100 MHz, CDCl<sub>3</sub>): δ 171.5, 160.3, 136.3, 133.9, 129.7, 128.6, 128.0, 126.7, 126.6, 124.9, 114.4, 80.2, 70.4, 55.4, 40.9, 32.6; **IR** (ATR):  $\tilde{\nu}$  = 2940, 2834, 2322, 1702, 1616, 1513, 1350, 1246, 1163, 963, 697 cm<sup>-1</sup>; **HRMS** (ESI) *m/z*: [M+Na]<sup>+</sup> Calcd for C<sub>20</sub>H<sub>23</sub>NNaO<sub>5</sub>S<sup>+</sup> 412.1189, found 412.1191.

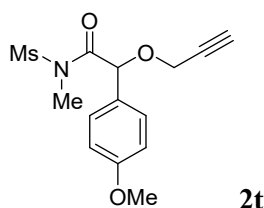

Sticky colorless oil (19.3 mg, 62%, EtOAc:Hex = 1:4); **<sup>1</sup>H NMR** (400 MHz, CDCl<sub>3</sub>): δ 7.37 (d, *J* = 8.7 Hz, 2H), 6.95 (d, *J* = 8.9 Hz, 2H), 5.73 (s, 1H), 4.27 (dd of ABq, *J* = 15.9, 2.4 Hz, 1H), 4.14 (dd of ABq, *J* = 15.9, 2.4 Hz, 1H), 3.84 (s, 3H), 3.25 (s, 3H), 3.08 (s, 3H), 2.55 (t, *J* = 2.4 Hz, 1H); **<sup>13</sup>C NMR** (100 MHz, CDCl<sub>3</sub>): δ 170.7, 160.5, 130.2, 125.6, 114.4, 78.7, 78.6, 76.0, 56.2, 55.4, 41.0, 32.6; **IR** (ATR):  $\tilde{\nu}$  = 3016, 2325, 1701, 1616, 1518, 1358, 1463, 1275, 1154, 1059, 750 cm<sup>-1</sup>; **HRMS** (ESI) *m/z*: [M+Na]<sup>+</sup> Calcd for C<sub>14</sub>H<sub>17</sub>NNaO<sub>5</sub>S<sup>+</sup> 334.0720, found 334.0719.

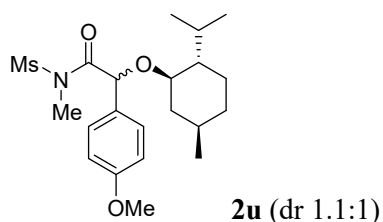

Sticky colorless oil (26.2 mg, 64%, EtOAc:Hex = 1:4)

(diastereomeric mixture) **<sup>1</sup>H NMR** (400 MHz, CDCl<sub>3</sub>): δ 7.34 (d, *J* = 8.6 Hz, 2H), 6.91 (d, *J* = 8.7 Hz, 1H), 6.90 (d, *J* = 8.8 Hz, 1H), 5.60 (s, 0.5H), 5.49 (s, 0.5H), 3.81 (s, 1.5H), 3.80 (s, 1.5H), 3.36 (td, *J* = 4.2, 10.5 Hz, 0.5H), 3.20 (s, 1.5H), 3.19 (td, *J* = 4.2, 10.6 Hz, 0.5H), 3.13 (s, 1.5H), 3.03 (s, 1.5H), 3.02 (s, 1.5H), 2.45-2.35 (m, 0.5H), 2.30-2.18 (m, 0.5H), 2.18-2.02 (m, 1H), 1.72-1.55 (m, 2H), 1.41-1.21 (m, 2H), 1.08-0.81 (m, 3H), 0.92 (d, *J* = 7.1 Hz, 3H), 0.90 (d, *J* = 7.1 Hz, 1.5H), 0.86 (d, *J* = 7.1 Hz, 1.5H), 0.81 (d, *J* = 6.9 Hz, 1.5H), 0.52 (d, *J* = 6.9 Hz, 1.5H).

(diastereomeric mixture)  $^{13}\text{C}$  NMR (100 MHz,  $\text{CDCl}_3$ ):  $\delta$  172.6, 172.5, 160.0, 159.9, 129.1, 128.2, 128.0, 127.2, 114.4, 114.3, 79.6, 79.4, 79.1, 78.8, 55.33, 55.32, 48.3, 40.9, 40.8, 40.4, 40.3, 34.4, 34.3, 32.5, 32.4, 31.6, 31.5, 25.3, 25.2, 22.9, 22.3, 21.2, 21.1, 16.0, 15.6.

**IR** (ATR):  $\tilde{\nu}$  = 3013, 2955, 2357, 1707, 1606, 1511, 1463, 1351, 1275, 1168, 1063, 1259, 1267, 963  $\text{cm}^{-1}$ ; **HRMS** (ESI)  $m/z$ :  $[\text{M}+\text{Na}]^+$  Calcd for  $\text{C}_{21}\text{H}_{33}\text{NNaO}_5\text{S}^+$  434.1972, found 434.1980.

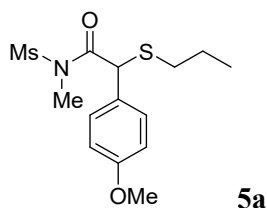

Sticky colorless oil (30.6 mg, 93%, EtOAc:Hex = 1:3);  $^1\text{H}$  NMR (400 MHz,  $\text{CDCl}_3$ ):  $\delta$  7.36 (d,  $J$  = 8.7 Hz, 2H), 6.89 (d,  $J$  = 8.7 Hz, 2H), 5.34 (s, 1H), 3.81 (s, 3H), 3.27 (s, 3H), 3.06 (s, 3H), 2.46 (t,  $J$  = 7.3 Hz, 2H), 1.55 (sextet of doublet,  $J$  = 7.7, 1.4 Hz, 2H), 0.94 (t,  $J$  = 7.3 Hz, 3H);  $^{13}\text{C}$  NMR (100 MHz,  $\text{CDCl}_3$ ):  $\delta$  171.1, 159.6, 130.1, 127.2, 114.3, 55.3, 51.8, 41.0, 33.5, 33.1, 22.4, 13.5; **IR** (ATR):  $\tilde{\nu}$  = 2926, 2873, 2326, 1688, 1605, 1463, 1511, 1350, 1256, 1164, 1032, 965, 764  $\text{cm}^{-1}$ ; **HRMS** (ESI)  $m/z$ :  $[\text{M}+\text{Na}]^+$  Calcd for  $\text{C}_{14}\text{H}_{21}\text{NNaO}_4\text{S}_2^+$  354.0804, found 354.0805.

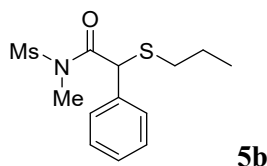

Sticky colorless oil (25.0 mg, 83%, EtOAc:Hex = 1:3);  $^1\text{H}$  NMR (400 MHz,  $\text{CDCl}_3$ ):  $\delta$  7.44 (d,  $J$  = 7.3 Hz, 2H), 7.41-7.28 (m, 3H), 5.38 (s, 1H), 3.27 (s, 3H), 3.05 (s, 3H), 2.47 (t,  $J$  = 6.9 Hz, 2H), 1.56 (sextet of doublet,  $J$  = 1.2, 7.7 Hz, 2H), 0.94 (t,  $J$  = 7.4 Hz, 3H);  $^{13}\text{C}$  NMR (100 MHz,  $\text{CDCl}_3$ ):  $\delta$  170.9, 135.5, 129.0, 128.8, 128.4, 52.4, 41.0, 33.5, 33.1, 22.4, 13.5; **IR** (ATR):  $\tilde{\nu}$  = 2959, 2398, 1688, 1349, 1163, 1074, 964, 773  $\text{cm}^{-1}$ ; **HRMS** (ESI)  $m/z$ :  $[\text{M}+\text{Na}]^+$  Calcd for  $\text{C}_{13}\text{H}_{19}\text{NNaO}_3\text{S}_2^+$  324.0699, found 324.0703.

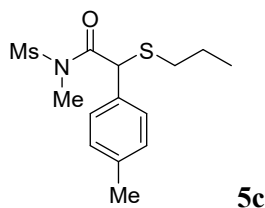

Sticky colorless oil (23.1 mg, 73%, EtOAc:Hex = 1:3); **<sup>1</sup>H NMR** (400 MHz, CDCl<sub>3</sub>): δ 7.31 (d, *J* = 7.8 Hz, 2H), 7.17 (d, *J* = 7.8 Hz, 2H), 5.33 (s, 1H), 3.26 (s, 3H), 3.06 (s, 3H), 2.46 (t, *J* = 7.3 Hz, 2H), 2.34 (s, 3H), 1.56 (tq, *J* = 7.6, 7.2 Hz, 2H), 0.94 (t, *J* = 7.4 Hz, 3H); **<sup>13</sup>C NMR** (100 MHz, CDCl<sub>3</sub>): δ 171.0, 138.3, 132.3, 129.7, 128.7, 52.2, 41.0, 33.5, 33.1, 22.4, 21.2, 13.5; **HRMS** (ESI) *m/z*: [M+Na]<sup>+</sup> Calcd for C<sub>14</sub>H<sub>21</sub>NNaO<sub>3</sub>S<sub>2</sub><sup>+</sup> 338.0855, found 338.0861.

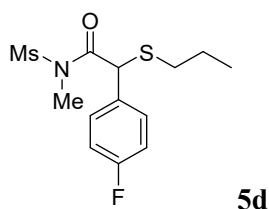

Sticky colorless oil (26.1 mg, 82%, EtOAc:Hex = 1:3); **<sup>1</sup>H NMR** (400 MHz, CDCl<sub>3</sub>): δ 7.46 (dd, *J* = 8.8, 5.3 Hz, 2H), 7.06 (t, *J* = 8.6 Hz, 2H), 5.41 (s, 1H), 3.29 (s, 3H), 3.13 (s, 3H), 2.46 (t, *J* = 7.2 Hz, 2H), 1.55 (sextet of doublet, *J* = 7.6, 1.2 Hz, 2H), 0.94 (t, *J* = 7.3 Hz, 3H); **<sup>13</sup>C NMR** (100 MHz, CDCl<sub>3</sub>): δ 170.7, 162.6 (d, *J* = 246.6 Hz), 131.4 (d, *J* = 3.2 Hz), 130.7 (d, *J* = 8.2 Hz), 115.8 (d, *J* = 21.7 Hz), 51.1, 41.1, 33.6, 33.1, 22.3, 13.5; **IR** (ATR):  $\tilde{\nu}$  = 2997, 2968, 2326, 1694, 1598, 1509, 1354, 1226, 1160, 961, 778 cm<sup>-1</sup>; **HRMS** (ESI) *m/z*: [M+Na]<sup>+</sup> Calcd for C<sub>13</sub>H<sub>18</sub>FNNaO<sub>3</sub>S<sub>2</sub><sup>+</sup> 342.0604, found 342.0598.

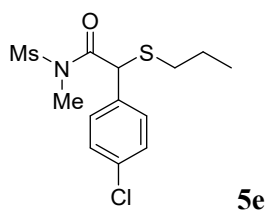

Sticky colorless oil (23.9 mg, 71%, EtOAc:Hex = 1:3); **<sup>1</sup>H NMR** (400 MHz, CDCl<sub>3</sub>): δ 7.42 (d, *J* = 8.4 Hz, 2H), 7.34 (d, *J* = 8.4 Hz, 2H), 5.39 (s, 1H), 3.29 (s, 3H), 3.15 (s, 3H), 2.46 (t, *J* = 7.3 Hz, 2H), 1.56 (sextet of doublet, *J* = 7.6, 1.2 Hz, 2H), 0.94 (t, *J* = 7.3 Hz, 3H); **<sup>13</sup>C NMR** (100 MHz, CDCl<sub>3</sub>): δ 170.5, 134.4, 134.2, 130.3, 129.0, 51.1, 41.1, 33.6, 33.2, 22.3, 13.5; **IR** (ATR):  $\tilde{\nu}$  = 3013, 2951, 2348, 1689,

1490, 1351, 1275, 1164, 1075, 966, 750  $\text{cm}^{-1}$ ; **HRMS** (ESI)  $m/z$ :  $[\text{M}+\text{Na}]^+$  Calcd for  $\text{C}_{13}\text{H}_{18}\text{ClNNaO}_3\text{S}_2^+$  358.0309, found 358.0311.

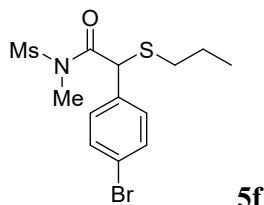

Sticky colorless oil (25.8 mg, 68%, EtOAc:Hex = 1:3);  **$^1\text{H}$  NMR** (400 MHz,  $\text{CDCl}_3$ ):  $\delta$  7.49 (d,  $J = 8.4$  Hz, 2H), 7.36 (d,  $J = 8.4$  Hz, 2H), 5.38 (s, 1H), 3.29 (s, 3H), 3.15 (s, 3H), 2.46 (t,  $J = 7.4$  Hz, 2H), 1.55 (sextet of doublet,  $J = 7.6, 1.2$  Hz, 2H), 0.94 (t,  $J = 7.3$  Hz, 3H);  **$^{13}\text{C}$  NMR** (100 MHz,  $\text{CDCl}_3$ ):  $\delta$  170.4, 134.8, 132.0, 130.7, 122.5, 51.2, 41.1, 33.6, 33.2, 22.3, 13.5; **IR** (ATR):  $\tilde{\nu} = 2999, 2965, 2342, 1688, 1352, 1275, 1163, 1072, 965, 750$   $\text{cm}^{-1}$ ; **HRMS** (ESI)  $m/z$ :  $[\text{M}+\text{Na}]^+$  Calcd for  $\text{C}_{13}\text{H}_{18}\text{BrNNaO}_3\text{S}_2^+$  401.9804, found 401.9810.

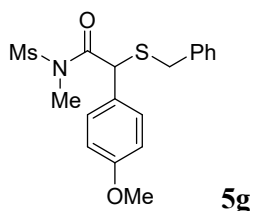

Sticky colorless oil (36.8 mg, 97%, EtOAc:Hex = 1:3);  **$^1\text{H}$  NMR** (400 MHz,  $\text{CDCl}_3$ ):  $\delta$  7.46-7.17 (m, 7H), 6.89 (d,  $J = 8.7$  Hz, 2H), 4.98 (s, 1H), 3.80 (s, 3H), 3.76 (d of ABq,  $J = 13.5$  Hz, 1H), 3.55 (d of ABq,  $J = 13.5$  Hz, 1H), 3.05 (s, 3H), 2.95 (s, 3H);  **$^{13}\text{C}$  NMR** (100 MHz,  $\text{CDCl}_3$ ):  $\delta$  170.8, 159.8, 137.4, 130.3, 129.2, 128.7, 127.4, 126.5, 114.4, 55.4, 50.8, 41.2, 35.9, 32.6; **IR** (ATR):  $\tilde{\nu} = 3016, 2934, 2345, 1688, 1606, 1510, 1350, 1252, 1163, 1076, 770, 704$   $\text{cm}^{-1}$ ; **HRMS** (ESI)  $m/z$ :  $[\text{M}+\text{Na}]^+$  Calcd for  $\text{C}_{18}\text{H}_{21}\text{NNaO}_4\text{S}_2^+$  402.0804, found 402.0801.

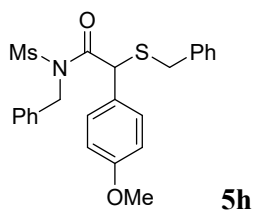

Sticky colorless oil (44.7 mg, 98%, EtOAc:Hex = 1:3); **<sup>1</sup>H NMR** (400 MHz, CDCl<sub>3</sub>): δ 7.33-7.25 (m, 5H), 7.23-7.17 (m, 4H), 7.10-7.03 (m, 2H), 6.87 (d, *J* = 8.8 Hz, 2H), 5.00-4.88 (m, 2H), 4.78 (d of ABq, *J* = 16.6 Hz, 1H), 3.79 (s, 3H), 3.74 (d of ABq, *J* = 13.7 Hz, 1H), 3.41 (d of ABq, *J* = 13.7 Hz, 1H), 2.89 (s, 3H); **<sup>13</sup>C NMR** (100 MHz, CDCl<sub>3</sub>): δ 171.3, 159.8, 137.5, 136.2, 130.6, 129.2, 129.0, 128.9, 128.1, 127.6, 127.3, 126.7, 114.3, 55.4, 50.3, 49.0, 42.6, 35.8; **IR** (ATR):  $\tilde{\nu}$  = 3009, 2349, 1692, 1606, 1510, 1353, 1255, 1164, 1030, 961, 702 cm<sup>-1</sup>; **HRMS** (ESI) *m/z*: [M+Na]<sup>+</sup> Calcd for C<sub>24</sub>H<sub>25</sub>NNaO<sub>4</sub>S<sub>2</sub><sup>+</sup> 478.1117, found 478.1118.

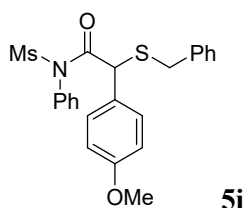

Sticky colorless oil (43.3 mg, 98%, EtOAc:Hex = 1:3); **<sup>1</sup>H NMR** (400 MHz, CDCl<sub>3</sub>): δ 7.36 (t, *J* = 8.6 Hz, 1H), 7.32-7.15 (m, 7H), 6.90 (d, *J* = 8.8 Hz, 2H), 6.81-6.73 (m, 4H), 4.15 (s, 1H), 3.78 (s, 3H), 3.75 (d of ABq, *J* = 13.7 Hz, 1H), 3.45 (d of ABq, *J* = 13.7 Hz, 1H), 3.41 (s, 3H); **<sup>13</sup>C NMR** (100 MHz, CDCl<sub>3</sub>): δ 170.8, 159.8, 137.2, 134.4, 130.2, 130.0, 129.6, 129.1, 128.8, 127.4, 126.5, 114.2, 55.4, 51.2, 42.1, 35.9; **IR** (ATR):  $\tilde{\nu}$  = 3007, 2336, 1700, 1510, 1357, 1275, 1143, 1029, 963 cm<sup>-1</sup>; **HRMS** (ESI) *m/z*: [M+Na]<sup>+</sup> Calcd for C<sub>23</sub>H<sub>23</sub>NNaO<sub>4</sub>S<sub>2</sub><sup>+</sup> 464.0961, found 464.0955.

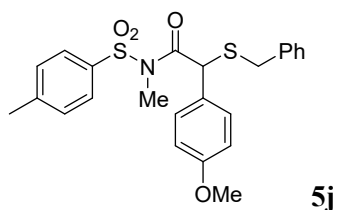

White solid (36.6 mg, 80%, EtOAc:Hex = 1:3); **<sup>1</sup>H NMR** (400 MHz, CDCl<sub>3</sub>): δ 7.58 (d, *J* = 8.2 Hz, 2H), 7.34 (t, *J* = 7.2 Hz, 2H), 7.31-7.16 (m, 7H), 6.84 (d, *J* = 8.6 Hz, 2H), 5.11 (s, 1H), 3.83 (s, 3H), 3.70 (d of ABq, *J* = 13.3 Hz, 1H), 3.53 (d of ABq, *J* = 13.3 Hz, 1H), 3.07 (s, 3H), 2.45 (s, 3H); **<sup>13</sup>C NMR** (100 MHz, CDCl<sub>3</sub>): δ 170.2, 159.5, 144.9, 137.4, 135.5, 130.2, 129.6, 129.1, 128.6, 127.9, 127.3, 126.8, 114.2, 55.3, 51.1, 35.9, 33.2, 21.7; **IR** (ATR):  $\tilde{\nu}$  = 3011, 2342, 1702, 1608, 1510, 1456, 1355, 1275, 1258, 1167 cm<sup>-1</sup>; **HRMS** (ESI) *m/z*: [M+Na]<sup>+</sup> Calcd for C<sub>24</sub>H<sub>25</sub>NNaO<sub>4</sub>S<sub>2</sub><sup>+</sup> 478.1117, found 478.1110.



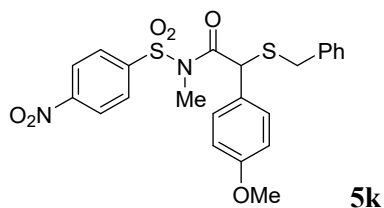

White solid (40.6 mg, 80%, EtOAc:Hex = 1:3); **<sup>1</sup>H NMR** (400 MHz, CDCl<sub>3</sub>): δ 8.28 (d, *J* = 8.4 Hz, 2H), 7.93 (d, *J* = 8.0 Hz, 2H), 7.33 (t, *J* = 8.0 Hz, 2H), 7.28 (t, *J* = 7.2 Hz, 1H), 7.21 (d, *J* = 7.2 Hz, 2H), 7.13 (d, *J* = 7.2 Hz, 2H), 6.82 (d, *J* = 7.2 Hz, 2H), 4.79 (s, 1H), 3.80 (s, 3H), 3.69 (d of ABq, *J* = 13.6 Hz, 1H), 3.51 (d of ABq, *J* = 13.2 Hz, 1H), 3.10 (s, 3H); **<sup>13</sup>C NMR** (100 MHz, CDCl<sub>3</sub>): δ 170.0, 159.8, 150.5, 144.1, 137.1, 130.1, 129.5, 129.1, 128.8, 127.5, 125.7, 124.1, 114.4, 55.4, 51.0, 35.8, 33.2; **IR** (ATR):  $\tilde{\nu}$  = 2931, 1710, 1597, 1530, 1349, 1164, 1010, 746 cm<sup>-1</sup>; **HRMS** (ESI) *m/z*: [M+Na]<sup>+</sup> Calcd for C<sub>23</sub>H<sub>22</sub>N<sub>2</sub>NaO<sub>6</sub>S<sub>2</sub><sup>+</sup> 509.0811, found 509.0804.

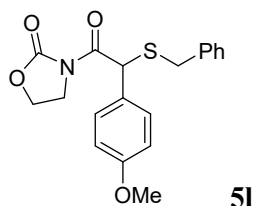

White solid (34.8 mg, 97%, EtOAc:Hex = 1:1); **<sup>1</sup>H NMR** (400 MHz, CDCl<sub>3</sub>): δ 7.43 (d, *J* = 7.2 Hz, 2H), 7.34-7.16 (m, 5H), 6.85 (d, *J* = 7.6 Hz, 2H), 5.96 (s, 1H), 4.32-4.19 (m, 2H), 3.83 (t, *J* = 8.4 Hz, 2H), 3.79 (s, 3H), 3.75 (d of ABq, *J* = 12.0 Hz, 1H), 3.69 (d of ABq, *J* = 13.2 Hz, 1H); **<sup>13</sup>C NMR** (100 MHz, CDCl<sub>3</sub>): δ 170.7, 159.5, 152.8, 137.5, 130.4, 129.1, 128.5, 127.7, 127.2, 114.1, 61.8, 55.3, 48.8, 42.8, 36.5; **IR** (ATR):  $\tilde{\nu}$  = 3004, 2985, 2320, 1775, 1697, 1606, 1509, 1386, 1259, 1030, 750 cm<sup>-1</sup>; **HRMS** (ESI) *m/z*: [M+Na]<sup>+</sup> Calcd for C<sub>19</sub>H<sub>19</sub>NNaO<sub>4</sub>S<sup>+</sup> 380.0927, found 380.0930.

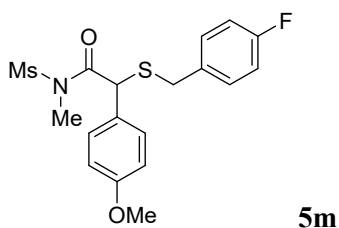

Sticky colorless oil (31.0 mg, 78%, EtOAc:Hex = 1:3); **<sup>1</sup>H NMR** (400 MHz, CDCl<sub>3</sub>): δ 7.32 (d, *J* = 8.7 Hz, 2H), 7.25 (dd, *J* = 8.4, 5.0 Hz, 2H), 7.01 (t, *J* = 8.6 Hz, 2H), 6.89 (d, *J* = 8.8 Hz, 2H), 5.04 (s, 1H),

3.81 (s, 3H), 3.73 (d of ABq,  $J = 13.4$  Hz, 1H), 3.55 (d of ABq,  $J = 13.5$  Hz, 1H), 3.10 (s, 3H), 2.97 (s, 3H);  $^{13}\text{C}$  NMR (100 MHz,  $\text{CDCl}_3$ ):  $\delta$  170.7, 162.0 (d,  $J = 244.7$  Hz), 159.8, 133.0 (d,  $J = 3.3$  Hz), 130.7 (d,  $J = 8.0$  Hz), 130.2, 126.3, 115.5 (d,  $J = 21.2$  Hz), 114.5, 55.4, 51.1, 41.1, 35.1, 32.8; IR (ATR):  $\tilde{\nu} = 3393, 3030, 2916, 2852, 1687, 1461, 1346, 1159, 1085, 1020, 967, 875, 824, 752$   $\text{cm}^{-1}$ ; HRMS (ESI)  $m/z$ :  $[\text{M}+\text{Na}]^+$  Calcd for  $\text{C}_{18}\text{H}_{20}\text{FNNaO}_4\text{S}_2^+$  420.0710, found 420.0711.

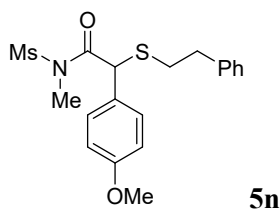

Sticky colorless oil (33.9 mg, 86%, EtOAc:Hex = 1:3);  $^1\text{H}$  NMR (400 MHz,  $\text{CDCl}_3$ ):  $\delta$  7.32 (d,  $J = 8.7$  Hz, 2H), 7.28 (t,  $J = 7.6$  Hz, 2H), 7.20 (t,  $J = 7.4$  Hz, 1H), 7.15 (d,  $J = 7.0$  Hz, 2H), 6.88 (d,  $J = 8.7$  Hz, 2H), 5.25 (s, 1H), 3.80 (s, 3H), 3.18 (s, 3H), 3.02 (s, 3H), 2.87-2.65 (m, 4H);  $^{13}\text{C}$  NMR (100 MHz,  $\text{CDCl}_3$ ):  $\delta$  170.9, 159.7, 140.1, 130.1, 128.6, 128.5, 127.0, 126.5, 114.4, 55.4, 52.0, 41.0, 35.8, 33.0, 32.7; IR (ATR):  $\tilde{\nu} = 3023, 2931, 2413, 1691, 1607, 1510, 1351, 1254, 1164, 1029, 964, 749$   $\text{cm}^{-1}$ ; HRMS (ESI)  $m/z$ :  $[\text{M}+\text{Na}]^+$  Calcd for  $\text{C}_{19}\text{H}_{23}\text{NNaO}_4\text{S}_2^+$  416.0961, found 416.0959.

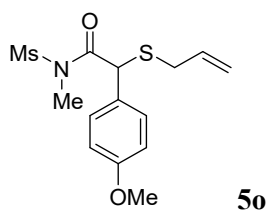

Sticky colorless oil (26.8 mg, 81%, EtOAc:Hex = 1:3);  $^1\text{H}$  NMR (400 MHz,  $\text{CDCl}_3$ ):  $\delta$  7.35 (d,  $J = 8.5$  Hz, 2H), 6.89 (d,  $J = 8.4$  Hz, 2H), 5.81 (ddt,  $J = 16.8, 10.0, 6.8$  Hz, 1H), 5.22 (s, 1H), 5.17 (d,  $J = 10.7$  Hz, 1H), 5.13 (d,  $J = 17.0$  Hz, 1H), 3.81 (s, 3H), 3.25 (s, 3H), 3.18 (dd of ABq,  $J = 13.8, 6.6$  Hz, 1H), 3.07 (s, 3H), 3.01 (dd of ABq,  $J = 13.9, 7.8$  Hz, 1H);  $^{13}\text{C}$  NMR (100 MHz,  $\text{CDCl}_3$ ):  $\delta$  170.9, 159.7, 133.7, 130.2, 126.6, 118.2, 114.4, 55.3, 50.8, 41.2, 34.5, 32.9; IR (ATR):  $\tilde{\nu} = 2940, 2844, 2351, 1698, 1605, 1511, 1353, 1248, 1161, 961, 834, 505$   $\text{cm}^{-1}$ ; HRMS (ESI)  $m/z$ :  $[\text{M}+\text{Na}]^+$  Calcd for  $\text{C}_{14}\text{H}_{19}\text{NNaO}_4\text{S}_2^+$  352.0648, found 352.0640.

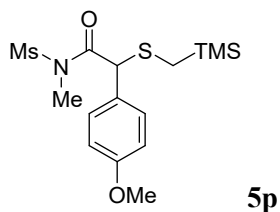

Sticky colorless oil (32.0 mg, 85%, EtOAc:Hex = 1:4); **<sup>1</sup>H NMR** (400 MHz, CDCl<sub>3</sub>): δ 7.37 (d, *J* = 8.4 Hz, 2H), 6.91 (d, *J* = 8.8 Hz, 2H), 5.23 (s, 1H), 3.82 (s, 3H), 3.29 (s, 3H), 3.10 (s, 3H), 1.75 (d of ABq, *J* = 11.6 Hz, 1H), 1.72 (d of ABq, *J* = 11.6 Hz, 1H), 0.07 (s, 9H); **<sup>13</sup>C NMR** (100 MHz, CDCl<sub>3</sub>): δ 172.6, 161.2, 131.9, 128.5, 115.9, 57.0, 56.1, 42.8, 34.7, 18.9, 0.0; **IR** (ATR):  $\tilde{\nu}$  = 2992, 2956, 2325, 1690, 1607, 1511, 1350, 1252, 1163, 1076, 847, 765 cm<sup>-1</sup>; **HRMS** (ESI) *m/z*: [M+Na]<sup>+</sup> Calcd for C<sub>15</sub>H<sub>25</sub>NNaO<sub>4</sub>S<sub>2</sub>Si<sup>+</sup> 398.0886, found 398.0880.

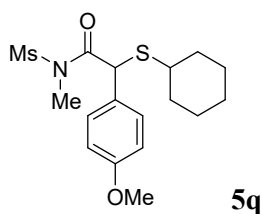

Sticky colorless oil (34.7 mg, 93%, EtOAc:Hex = 1:4); **<sup>1</sup>H NMR** (400 MHz, CDCl<sub>3</sub>): δ 7.37 (d, *J* = 8.8 Hz, 2H), 6.88 (d, *J* = 8.7 Hz, 2H), 5.45 (s, 1H), 3.80 (s, 3H), 3.27 (s, 3H), 3.07 (s, 3H), 2.69-2.56 (m, 1H), 2.03-1.90 (m, 1H), 1.86-1.62 (m, 3H), 1.62-1.50 (m, 1H), 1.44-1.15 (m, 5H); **<sup>13</sup>C NMR** (100 MHz, CDCl<sub>3</sub>): δ 171.2, 159.6, 130.0, 127.7, 114.3, 55.3, 50.3, 43.8, 41.0, 33.5, 33.3, 33.1, 25.9, 25.8, 25.7; **IR** (ATR):  $\tilde{\nu}$  = 2931, 2860, 2420, 1693, 1511, 1351, 1255, 1164, 1074, 964, 765 cm<sup>-1</sup>; **HRMS** (ESI) *m/z*: [M+Na]<sup>+</sup> Calcd for C<sub>17</sub>H<sub>25</sub>NNaO<sub>4</sub>S<sub>2</sub><sup>+</sup> 394.1117, found 394.1114.

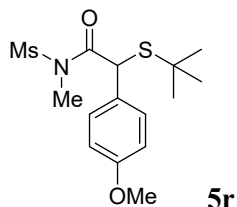

Sticky colorless oil (20.0 mg, 58%, EtOAc:Hex = 1:4); **<sup>1</sup>H NMR** (400 MHz, CDCl<sub>3</sub>): δ 7.40 (d, *J* = 8.6 Hz, 2H), 6.89 (d, *J* = 8.6 Hz, 2H), 5.57 (s, 1H), 3.81 (s, 3H), 3.29 (s, 3H), 3.05 (s, 3H), 1.33 (s, 9H); **<sup>13</sup>C NMR** (100 MHz, CDCl<sub>3</sub>): δ 172.0, 159.5, 129.9, 128.2, 114.4, 55.3, 49.4, 45.2, 40.9, 33.2, 31.1; **IR**

(ATR):  $\tilde{\nu}$  = 2961, 2349, 1693, 1608, 1510, 1349, 1252, 1163, 1071, 964, 749  $\text{cm}^{-1}$ ; **HRMS** (ESI)  $m/z$ :  $[\text{M}+\text{Na}]^+$  Calcd for  $\text{C}_{15}\text{H}_{23}\text{NNaO}_4\text{S}_2^+$  368.0961, found 368.0963.

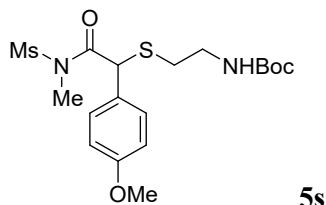

Sticky colorless oil (35.1 mg, 81%, EtOAc:Hex = 1:4);  **$^1\text{H NMR}$**  (400 MHz,  $\text{CDCl}_3$ ):  $\delta$  7.35 (d,  $J$  = 8.7 Hz, 2H), 6.89 (d,  $J$  = 8.7 Hz, 2H), 5.40 (s, 1H), 4.87 (s, 1H), 3.80 (s, 3H), 3.36-3.17 (m, 5H), 3.17 (s, 3H), 2.67-2.52 (m, 2H), 1.43 (s, 9H);  **$^{13}\text{C NMR}$**  (100 MHz,  $\text{CDCl}_3$ ):  $\delta$  171.1, 159.8, 155.8, 130.1, 126.7, 114.5, 79.5, 55.3, 51.8, 41.1, 39.4, 33.0, 31.7, 28.4; **IR** (ATR):  $\tilde{\nu}$  = 3376, 2989, 2348, 1690, 1511, 1350, 1257, 1163, 1078, 966, 750  $\text{cm}^{-1}$ ; **HRMS** (ESI)  $m/z$ :  $[\text{M}+\text{Na}]^+$  Calcd for  $\text{C}_{18}\text{H}_{28}\text{N}_2\text{NaO}_6\text{S}_2^+$  455.1281, found 455.1287.

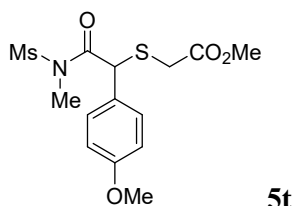

Sticky colorless oil (31.8 mg, 88%, EtOAc:Hex = 1:2);  **$^1\text{H NMR}$**  (400 MHz,  $\text{CDCl}_3$ ):  $\delta$  7.39 (d,  $J$  = 7.7 Hz, 2H), 6.91 (d,  $J$  = 7.7 Hz, 2H), 5.62 (s, 1H), 3.82 (s, 3H), 3.75 (s, 3H), 3.27 (s, 3H), 3.24 (d of ABq,  $J$  = 15.3 Hz, 1H), 3.12 (s, 3H), 3.06 (d of ABq,  $J$  = 15.1 Hz, 1H);  **$^{13}\text{C NMR}$**  (100 MHz,  $\text{CDCl}_3$ ):  $\delta$  170.7, 170.6, 160.0, 130.4, 125.8, 114.6, 55.4, 52.5, 52.1, 41.1, 32.9, 32.1; **IR** (ATR):  $\tilde{\nu}$  = 3007, 2324, 1689, 1607, 1511, 1349, 1257, 1163, 1029, 965, 765  $\text{cm}^{-1}$ ; **HRMS** (ESI)  $m/z$ :  $[\text{M}+\text{Na}]^+$  Calcd for  $\text{C}_{14}\text{H}_{19}\text{NNaO}_6\text{S}_2^+$  384.0546, found 384.0545.

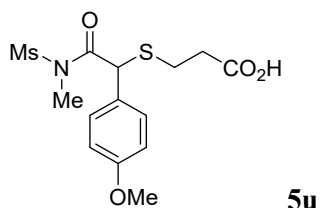

Sticky colorless oil (35.4 mg, 98%, EtOAc:Hex = 1:0); **<sup>1</sup>H NMR** (400 MHz, CDCl<sub>3</sub>): δ 7.35 (d, *J* = 8.2 Hz, 2H), 6.91 (d, *J* = 8.1 Hz, 2H), 5.42 (s, 1H), 3.82 (s, 3H), 3.26 (s, 3H), 3.07 (s, 3H), 2.83-2.65 (m, 2H), 2.64-2.52 (m, 2H); **<sup>13</sup>C NMR** (100 MHz, CDCl<sub>3</sub>): δ 177.6, 170.9, 159.8, 130.1, 126.6, 114.6, 55.4, 52.3, 41.0, 34.2, 33.1, 25.8; **IR** (ATR):  $\tilde{\nu}$  = 3009, 2917, 2316, 1745, 1688, 1599, 1513, 1351, 1260, 1168, 1025, 750 cm<sup>-1</sup>; **HRMS** (ESI) *m/z*: [M+Na]<sup>+</sup> Calcd for C<sub>14</sub>H<sub>19</sub>NNaO<sub>6</sub>S<sub>2</sub><sup>+</sup> 384.0546, found 384.0547.

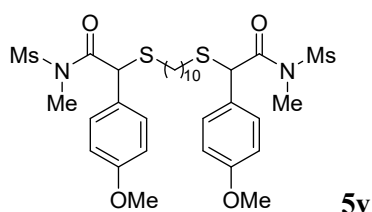

Sticky colorless oil (65.9 mg, 92%, EtOAc:Hex = 1:1); **<sup>1</sup>H NMR** (400 MHz, CDCl<sub>3</sub>): δ 7.35 (d, *J* = 8.6 Hz, 4H), 6.88 (d, *J* = 8.6 Hz, 4H), 5.32 (s, 2H), 3.80 (s, 6H), 3.26 (s, 6H), 3.06 (s, 6H), 2.46 (t, *J* = 7.3 Hz, 4H), 1.58-1.42 (m, 4H), 1.40-1.12 (m, 12H); **<sup>13</sup>C NMR** (100 MHz, CDCl<sub>3</sub>): δ 171.1, 159.6, 130.0, 127.2, 114.3, 55.3, 51.8, 41.0, 33.1, 31.4, 29.3, 29.1, 28.9, 28.8; **IR** (ATR):  $\tilde{\nu}$  = 3005, 2924, 2330, 1689, 1606, 1511, 1352, 1275, 1260, 1163, 764 cm<sup>-1</sup>; **HRMS** (ESI) *m/z*: [M+Na]<sup>+</sup> Calcd for C<sub>32</sub>H<sub>48</sub>N<sub>2</sub>NaO<sub>8</sub>S<sub>4</sub><sup>+</sup> 739.2186, found 739.2194.

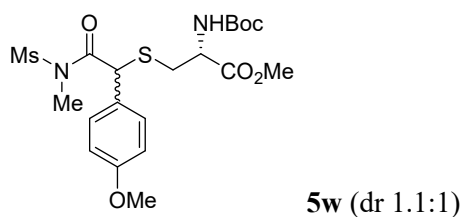

Sticky colorless oil (31.5 mg, 64%, EtOAc:Hex = 1:1)

(diastereomeric mixture) **<sup>1</sup>H NMR** (400 MHz, CDCl<sub>3</sub>): δ 7.34 (d, *J* = 8.4 Hz, 1H), 7.33 (d, *J* = 8.4 Hz, 1H), 6.89 (d, *J* = 8.4 Hz, 2H), 5.44 (s, SCH, 0.5H), 5.43 (s, SCH, 0.5H), 5.37 (d, *J* = 6.8 Hz, Boc-NH, 0.5H), 5.32 (d, *J* = 6.8 Hz, Boc-NH 0.5H), 4.63-4.39 (m, cys- $\alpha$ -H, 1H), 3.80 (s, 3H), 3.76 (s, CO<sub>2</sub>Me, 1.5H), 3.72 (s, CO<sub>2</sub>Me, 1.5H), 3.25 (s, 1.5H), 3.24 (s, 1.5H), 3.05 (s, 1.5H), 3.03 (s, 1.5H), 2.95 (dd, *J* = 14.0, 5.1 Hz, SCH<sub>2</sub>, 0.5H), 2.90-2.75 (m, SCH<sub>2</sub>, 1.5H), 1.46 (s, 4.5H), 1.44 (s, 4.5H).

(diastereomeric mixture)  $^{13}\text{C}$  NMR (100 MHz,  $\text{CDCl}_3$ ):  $\delta$  171.4, 171.3, 170.8, 159.8, 155.3, 130.2, 130.1, 126.4, 114.55, 114.54, 80.3, 55.3, 53.2, 53.0, 52.72, 52.70, 52.3, 41.1, 41.0, 33.6, 33.3, 33.0, 32.9, 28.3.

IR (ATR):  $\tilde{\nu}$  = 3377, 2979, 1750, 1714, 1505, 1366, 1164, 1064  $\text{cm}^{-1}$ ; HRMS (ESI)  $m/z$ :  $[\text{M}+\text{Na}]^+$  Calcd for  $\text{C}_{20}\text{H}_{30}\text{N}_2\text{NaO}_8\text{S}_2^+$  513.1336, found 513.1339.

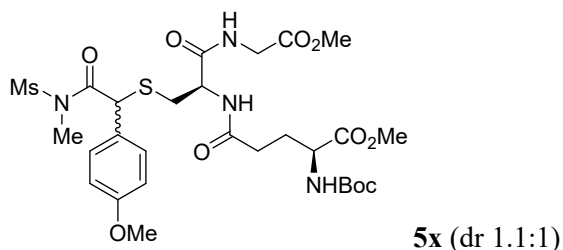

Sticky colorless oil (63.7 mg, 92%,  $\text{CH}_2\text{Cl}_2$ :MeOH = 10:1)

(diastereomeric mixture)  $^1\text{H}$  NMR (400 MHz,  $\text{CDCl}_3$ ):  $\delta$  7.38 (m, gly-NH, 0.5H), 7.35 (d,  $J$  = 8.4 Hz, 2H), 7.21 (m, gly-NH, 0.5H), 6.99 (d,  $J$  = 7.9 Hz, cys-NH, 1H), 6.90 (d,  $J$  = 8.6 Hz, 1H), 6.89 (d,  $J$  = 8.6 Hz, 1H), 5.41 (m, Boc-NH, 1H), 5.42 (s, SCH, 0.5H), 5.41 (s, SCH, 0.5H), 4.64 (m, cys- $\alpha$ -H, 1H), 4.32 (m, glu- $\alpha$ -H, 1H), 4.12-3.95 (m, gly- $\alpha$ -H, 2H), 3.80 (s, 3H), 3.73 (s, two  $\text{CO}_2\text{Me}$ , 6H), 3.25 (s, 1.5H), 3.22 (s, 1.5H), 3.20 (s, 1.5H), 3.12 (s, 1.5H), 3.05-2.94 (m,  $\text{SCH}_2$ , 1H), 2.81-2.68 (m,  $\text{SCH}_2$ , 1H), 2.35 (t,  $J$  = 7.0 Hz,  $\gamma$ -glu, 2H), 2.21-2.05 (m,  $\beta$ -glu, 1H), 2.05-1.90 (m,  $\beta$ -glu, 1H), 1.43 (s, 9H).

(diastereomeric mixture)  $^{13}\text{C}$  NMR (100 MHz,  $\text{CDCl}_3$ ):  $\delta$  172.9, 172.4, 172.3, 172.1, 171.4, 170.7, 170.6, 170.0, 169.9, 159.8, 155.6, 190.1, 129.9, 126.2, 126.1, 114.7, 80.1, 55.3, 53.5, 52.8, 52.5, 52.3, 51.9, 41.4, 41.3, 41.2, 41.1, 33.9, 32.88, 32.86, 31.9, 28.3.

IR (ATR):  $\tilde{\nu}$  = 3345, 2964, 2357, 1742, 1665, 1599, 1436, 1510, 1365, 1307, 1275, 1259, 1210, 1161, 1030  $\text{cm}^{-1}$ ; HRMS (ESI)  $m/z$ :  $[\text{M}+\text{Na}]^+$  Calcd for  $\text{C}_{28}\text{H}_{42}\text{N}_4\text{NaO}_{12}\text{S}_2^+$  713.2133, found 713.2140.

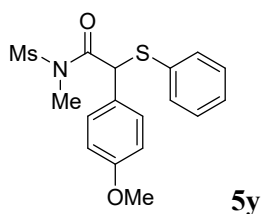

Sticky colorless oil (31.2 mg, 85%, EtOAc:Hex = 1:3); **<sup>1</sup>H NMR** (400 MHz, CDCl<sub>3</sub>): δ 7.39-7.31 (m, 2H), 7.29-7.20 (m, 2H), 6.83 (d, *J* = 8.3 Hz, 2H), 5.65 (s, 1H), 3.79 (s, 3H), 3.22 (s, 3H), 2.89 (s, 3H); **<sup>13</sup>C NMR** (100 MHz, CDCl<sub>3</sub>): δ 170.7, 159.8, 133.6, 133.2, 130.1, 129.1, 128.4, 126.8, 114.3, 56.6, 55.3, 40.9, 33.1; **IR** (ATR):  $\tilde{\nu}$  = 3023, 2325, 1693, 1511, 1351, 1258, 1164, 964, 764 cm<sup>-1</sup>; **HRMS** (ESI) *m/z*: [M+Na]<sup>+</sup> Calcd for C<sub>17</sub>H<sub>19</sub>NNaO<sub>4</sub>S<sub>2</sub><sup>+</sup> 388.0648, found 388.0645.

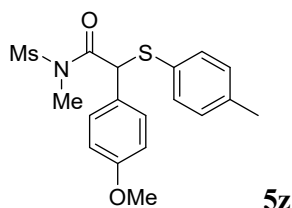

Sticky colorless oil (31.3 mg, 82%, EtOAc:Hex = 1:3); **<sup>1</sup>H NMR** (400 MHz, CDCl<sub>3</sub>): δ 7.30-7.17 (m, 4H), 7.07 (d, *J* = 7.9 Hz, 2H), 6.83 (d, *J* = 8.7 Hz, 2H), 5.55 (s, 1H), 3.79 (s, 3H), 3.21 (s, 3H), 2.91 (s, 3H), 2.31 (s, 3H); **<sup>13</sup>C NMR** (100 MHz, CDCl<sub>3</sub>): δ 170.9, 159.7, 138.8, 134.2, 130.2, 129.9, 129.4, 127.0, 114.3, 56.8, 55.3, 41.0, 33.0, 21.2; **IR** (ATR):  $\tilde{\nu}$  = 3016, 2928, 2356, 1692, 1607, 1510, 1350, 1255, 1164, 1075, 964, 765 cm<sup>-1</sup>; **HRMS** (ESI) *m/z*: [M+Na]<sup>+</sup> Calcd for C<sub>18</sub>H<sub>21</sub>NNaO<sub>4</sub>S<sub>2</sub><sup>+</sup> 402.0804, found 402.0800.

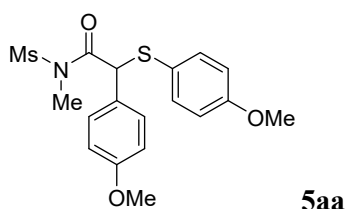

Sticky colorless oil (35.0 mg, 89%, EtOAc:Hex = 1:3); **<sup>1</sup>H NMR** (400 MHz, CDCl<sub>3</sub>): δ 7.26 (d, *J* = 8.7 Hz, 2H), 7.19 (d, *J* = 8.8 Hz, 2H), 6.82 (d, *J* = 8.7 Hz, 2H), 6.78 (d, *J* = 8.7 Hz, 2H), 5.45 (s, 1H), 3.79 (s, 3H), 3.78 (s, 3H), 3.20 (s, 3H), 2.93 (s, 3H); **<sup>13</sup>C NMR** (100 MHz, CDCl<sub>3</sub>): δ 170.9, 160.4, 159.7, 136.8, 130.2, 127.0, 123.2, 114.6, 114.2, 57.4, 55.33, 55.31, 41.0, 33.0; **IR** (ATR):  $\tilde{\nu}$  = 3005, 2934, 2336, 1690, 1591, 1510, 1463, 1350, 1257, 1164, 1029, 830 cm<sup>-1</sup>; **HRMS** (ESI) *m/z*: [M+Na]<sup>+</sup> Calcd for C<sub>18</sub>H<sub>21</sub>NNaO<sub>5</sub>S<sub>2</sub><sup>+</sup> 418.0753, found 418.0750.

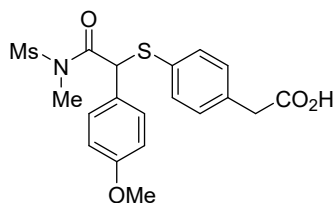

**5ab**

Sticky colorless oil (39.4 mg, 93%, EtOAc:Hex = 2:1); **<sup>1</sup>H NMR** (400 MHz, CDCl<sub>3</sub>): δ 10.94 (s, 1H), 7.30 (d, 2H, *J* = 8.7 Hz), 7.24 (d, 2H, *J* = 6.8 Hz), 7.17 (d, 2H, *J* = 8.2 Hz), 6.83 (d, 2H, *J* = 8.7 Hz), 5.63 (s, 1H), 3.78 (s, 3H), 3.61 (s, 2H), 3.20 (s, 3H), 2.87 (s, 3H); **<sup>13</sup>C NMR** (100 MHz, CDCl<sub>3</sub>): δ 177.3, 170.7, 159.8, 133.8, 133.7, 132.4, 130.2, 130.1, 126.6, 114.4, 56.6, 55.3, 40.9, 40.6, 33.1.; **IR** (ATR):  $\tilde{\nu}$  = 2933, 1693, 1606, 1510, 1349, 1252, 1163, 809 cm<sup>-1</sup>; **HRMS** (ESI) *m/z*: [M+Na]<sup>+</sup> Calcd for C<sub>19</sub>H<sub>21</sub>NNaO<sub>6</sub>S<sub>2</sub><sup>+</sup> 446.0703, found 446.0706.

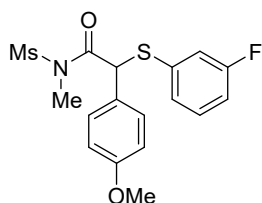

**5ac**

Sticky colorless oil (31.7 mg, 83%, EtOAc:Hex = 1:3); **<sup>1</sup>H NMR** (400 MHz, CDCl<sub>3</sub>): δ 7.30-7.17 (m, 3H), 7.09 (d, *J* = 7.6 Hz, 1H), 7.03 (d, *J* = 8.8 Hz, 1H), 6.96 (dt, *J* = 8.4, 2.0 Hz, 1H), 6.85 (d, *J* = 8.8 Hz, 2H), 5.72 (s, 1H), 3.79 (s, 3H), 3.23 (s, 3H), 2.89 (s, 3H); **<sup>13</sup>C NMR** (100 MHz, CDCl<sub>3</sub>): δ 170.3, 162.5 (d, *J* = 248.2 Hz), 159.9, 135.5 (d, *J* = 8.0 Hz), 130.3 (d, *J* = 8.1 Hz), 130.1, 128.6 (d, *J* = 3.0 Hz), 126.3, 119.8 (d, *J* = 22.1 Hz), 115.3 (d, *J* = 21.1 Hz), 114.5, 56.5, 55.3, 40.8, 33.2; **IR** (ATR):  $\tilde{\nu}$  = 3002, 2928, 2325, 1693, 1578, 1511, 1472, 1352, 1258, 1165, 881, 765 cm<sup>-1</sup>; **HRMS** (ESI) *m/z*: [M+Na]<sup>+</sup> Calcd for C<sub>17</sub>H<sub>18</sub>FNNaO<sub>4</sub>S<sub>2</sub><sup>+</sup> 406.0553, found 406.0551.

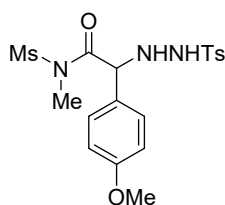

**7a**

Sticky colorless oil (37.0 mg, 84%, EtOAc:Hex = 1:2); **<sup>1</sup>H NMR** (400 MHz, CDCl<sub>3</sub>): δ 7.77 (d, *J* = 8.0 Hz, 2H), 7.29 (d, *J* = 8.0 Hz, 2H), 7.15 (d, *J* = 7.9 Hz, 2H), 6.86 (d, *J* = 7.8 Hz, 2H), 6.56 (s, 1H), 5.10 (d, *J* = 10.1 Hz, 1H), 4.27 (d, *J* = 10.2 Hz, 1H), 3.78 (s, 3H), 3.12 (s, 3H), 3.11 (s, 3H), 2.42 (s, 3H);



$^{13}\text{C}$  NMR (100 MHz,  $\text{CDCl}_3$ ):  $\delta$  173.4, 160.3, 144.1, 134.9, 129.9, 129.6, 128.2, 124.7, 114.7, 67.9, 55.4, 41.4, 32.2, 21.6; IR (ATR):  $\tilde{\nu}$  = 3307, 3010, 1715, 1612, 1513, 1311, 1249, 1151, 1033, 750  $\text{cm}^{-1}$ ; HRMS (ESI)  $m/z$ :  $[\text{M}+\text{Na}]^+$  Calcd for  $\text{C}_{18}\text{H}_{23}\text{N}_3\text{NaO}_6\text{S}_2^+$  464.0920, found 464.0925.

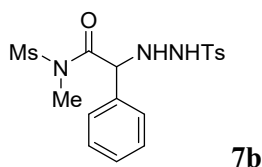

Sticky colorless oil (27.2 mg, 66%, EtOAc:Hex = 1:2);  $^1\text{H}$  NMR (400 MHz,  $\text{CDCl}_3$ ):  $\delta$  7.78 (d,  $J$  = 7.5 Hz, 2H), 7.42-7.32 (m, 3H), 7.32-7.18 (m, 4H), 6.32 (s, 1H), 5.19 (s, 1H), 4.23 (s, 1H), 3.13 (s, 3H), 3.10 (s, 3H), 2.42 (s, 3H);  $^{13}\text{C}$  NMR (100 MHz,  $\text{CDCl}_3$ ):  $\delta$  173.2, 144.1, 134.8, 132.9, 129.6, 129.5, 129.40, 129.38, 128.6, 128.3, 68.6, 41.3, 32.2, 21.6; IR (ATR):  $\tilde{\nu}$  = 3248, 2982, 1714, 1512, 1260, 1152, 1033, 749  $\text{cm}^{-1}$ ; HRMS (ESI)  $m/z$ :  $[\text{M}+\text{Na}]^+$  Calcd for  $\text{C}_{17}\text{H}_{21}\text{N}_3\text{NaO}_5\text{S}_2^+$  434.0815, found 434.0821.

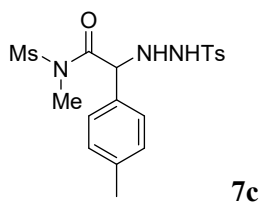

Sticky colorless oil (26.3 mg, 62%, EtOAc:Hex = 1:2);  $^1\text{H}$  NMR (400 MHz,  $\text{CDCl}_3$ ):  $\delta$  7.79 (d,  $J$  = 8.0 Hz, 2H), 7.30 (d,  $J$  = 8.0 Hz, 2H), 7.18 (d,  $J$  = 7.9 Hz, 2H), 7.12 (d,  $J$  = 7.9 Hz, 2H), 6.44 (d,  $J$  = 1.4 Hz, 1H), 5.14 (d,  $J$  = 10.2 Hz, 1H), 4.25 (dd,  $J$  = 2.0, 10.0 Hz, 1H), 3.24-3.02 (m, 6H), 2.43 (s, 3H), 2.35 (s, 3H);  $^{13}\text{C}$  NMR (100 MHz,  $\text{CDCl}_3$ ):  $\delta$  173.3, 144.1, 139.5, 134.8, 130.1, 129.8, 129.6, 128.5, 128.2, 68.3, 41.4, 32.2, 21.6, 21.2; IR (ATR):  $\tilde{\nu}$  = 3251, 2925, 1683, 1352, 1161, 749, 533  $\text{cm}^{-1}$ ; HRMS (ESI)  $m/z$ :  $[\text{M}+\text{Na}]^+$  Calcd for  $\text{C}_{18}\text{H}_{23}\text{N}_3\text{NaO}_5\text{S}_2^+$  448.0971, found 448.0975.

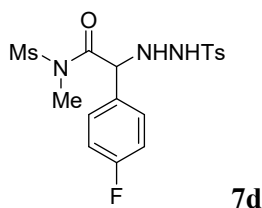

Sticky colorless oil (23.9 mg, 56%, EtOAc:Hex = 1:2); **<sup>1</sup>H NMR** (400 MHz, CDCl<sub>3</sub>): δ 7.76 (d, *J* = 8.2 Hz, 2H), 7.29 (d, *J* = 8.2 Hz, 2H), 7.22 (dd, *J* = 5.3, 8.5 Hz, 2H), 7.03 (t, *J* = 8.5 Hz, 2H), 6.61 (d, *J* = 1.1 Hz, 1H), 5.20 (d, *J* = 9.8 Hz, 1H), 4.33 (dd, *J* = 9.8, 2.2 Hz, 1H), 3.26-3.05 (m, 6H), 2.42 (s, 3H); **<sup>13</sup>C NMR** (100 MHz, CDCl<sub>3</sub>): δ 173.2, 163.0 (d, *J* = 249.2 Hz), 144.2, 134.6, 130.5 (d, *J* = 8.2 Hz), 129.6, 129.0 (d, *J* = 3.4 Hz), 128.2, 116.3 (d, 21.8 Hz), 67.8, 41.4, 32.3, 21.6; **IR** (ATR):  $\tilde{\nu}$  = 3251, 2977, 1693, 1599, 1509, 1363, 1316, 1228, 1153, 969, 750 cm<sup>-1</sup>; **HRMS** (ESI) *m/z*: [M+Na]<sup>+</sup> Calcd for C<sub>17</sub>H<sub>20</sub>FN<sub>3</sub>NaO<sub>5</sub>S<sub>2</sub><sup>+</sup> 452.0721, found 452.0723.

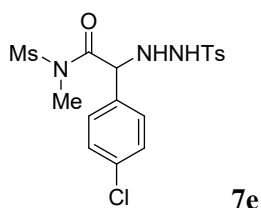

Sticky colorless oil (23.7 mg, 53%, EtOAc:Hex = 1:2); **<sup>1</sup>H NMR** (400 MHz, CDCl<sub>3</sub>): δ 7.76 (d, *J* = 8.0 Hz, 2H), 7.39-7.25 (m, 4H), 7.19 (d, *J* = 8.3 Hz, 2H), 6.48 (s, 1H), 5.24 (d, *J* = 8.6 Hz, 1H), 4.31 (d, *J* = 8.3 Hz, 1H), 3.24-3.10 (m, 6H), 2.44 (s, 3H); **<sup>13</sup>C NMR** (100 MHz, CDCl<sub>3</sub>): δ 173.0, 144.3, 135.5, 134.5, 131.6, 129.9, 129.6, 129.5, 128.2, 67.9, 41.5, 32.3, 21.6; **IR** (ATR):  $\tilde{\nu}$  = 3282, 2990, 1692, 1311, 1275, 1260, 1153, 1034, 1009, 764 cm<sup>-1</sup>; **HRMS** (ESI) *m/z*: [M+Na]<sup>+</sup> Calcd for C<sub>17</sub>H<sub>20</sub>ClN<sub>3</sub>NaO<sub>5</sub>S<sub>2</sub><sup>+</sup> 468.0425, found 468.0431.

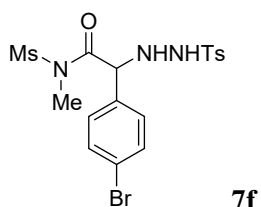

Sticky colorless oil (20.1 mg, 41%, EtOAc:Hex = 1:2); **<sup>1</sup>H NMR** (400 MHz, CDCl<sub>3</sub>): δ 7.74 (d, *J* = 8.3 Hz, 2H), 7.46 (d, *J* = 8.4 Hz, 2H), 7.28 (d, *J* = 8.0 Hz, 2H), 7.10 (d, *J* = 8.4 Hz, 2H), 6.57 (s, 1H), 5.20 (s, 1H), 4.41 (s, 1H), 3.15 (s, 3H), 3.14 (s, 3H), 2.42 (s, 3H); **<sup>13</sup>C NMR** (100 MHz, CDCl<sub>3</sub>): δ 173.0, 144.3, 134.5, 132.5, 132.1, 130.2, 129.6, 128.2, 123.7, 67.9, 41.5, 32.4, 21.6; **IR** (ATR):  $\tilde{\nu}$  = 3307, 2985, 1693, 1362, 1313, 1276, 1153, 1010, 750 cm<sup>-1</sup>; **HRMS** (ESI) *m/z*: [M+Na]<sup>+</sup> Calcd for C<sub>17</sub>H<sub>20</sub>BrN<sub>3</sub>NaO<sub>5</sub>S<sub>2</sub><sup>+</sup> 511.9920, found 511.9922.

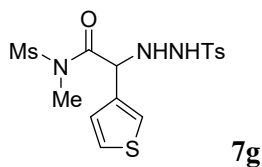

Brown oil (25.2 mg, 61%, EtOAc:Hex = 1:2); **<sup>1</sup>H NMR** (400 MHz, CDCl<sub>3</sub>): δ 7.78 (d, *J* = 8.2 Hz, 2H), 7.37-7.26 (m, 3H), 7.20 (d, *J* = 1.6 Hz, 1H), 7.02 (dd, *J* = 5.0, 1.2 Hz, 1H), 6.40 (s, 1H), 5.33 (d, *J* = 10.3 Hz, 1H), 4.26 (dd, *J* = 10.4, 3.1 Hz, 1H), 3.17 (s, 3H), 3.12 (s, 3H), 2.42 (s, 3H); **<sup>13</sup>C NMR** (100 MHz, CDCl<sub>3</sub>): δ 173.1, 144.2, 134.7, 133.4, 129.7, 128.2, 127.4, 127.3, 125.3, 63.8, 41.4, 32.3, 21.6; **IR** (ATR):  $\tilde{\nu}$  = 3260, 2922, 1687, 1350, 1160, 1092, 963, 814 cm<sup>-1</sup>; **HRMS** (ESI) *m/z*: [M+Na]<sup>+</sup> Calcd for C<sub>15</sub>H<sub>19</sub>N<sub>3</sub>NaO<sub>5</sub>S<sub>3</sub><sup>+</sup> 440.0379, found 440.0376.

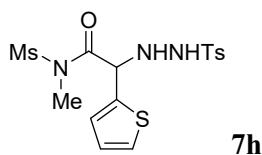

Sticky colorless oil (23.3 mg, 56%, EtOAc:Hex = 1:2); **<sup>1</sup>H NMR** (400 MHz, CDCl<sub>3</sub>): δ 7.82 (d, *J* = 8.3 Hz, 2H), 7.36 (dd, *J* = 4.4, 2.4 Hz, 1H), 7.34 (d, *J* = 8.1 Hz, 2H), 7.04-6.93 (m, 2H), 6.33 (d, *J* = 3.0 Hz, 1H), 5.48 (d, *J* = 10.2 Hz, 1H), 4.35 (dd, *J* = 10.2, 3.1 Hz, 1H), 3.25 (s, 3H), 3.19 (s, 3H), 2.45 (s, 3H); **<sup>13</sup>C NMR** (100 MHz, CDCl<sub>3</sub>): δ 172.3, 144.3, 134.9, 134.5, 129.7, 128.3, 127.94, 127.86, 127.3, 63.3, 41.4, 32.4, 21.6; **IR** (ATR):  $\tilde{\nu}$  = 3247, 2926, 1686, 1348, 1160, 1091, 963, 774 cm<sup>-1</sup>; **HRMS** (ESI) *m/z*: [M+Na]<sup>+</sup> Calcd for C<sub>15</sub>H<sub>19</sub>N<sub>3</sub>NaO<sub>5</sub>S<sub>3</sub><sup>+</sup> 440.0379, found 440.0378.

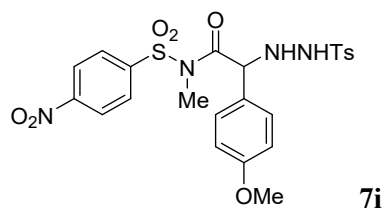

Sticky colorless oil (38.5 mg, 70%, EtOAc:Hex = 1:2); **<sup>1</sup>H NMR** (400 MHz, CDCl<sub>3</sub>): δ 8.32 (d, *J* = 8.6 Hz, 2H), 7.99 (d, *J* = 8.1 Hz, 2H), 7.69 (d, *J* = 7.7 Hz, 2H), 7.25 (d, *J* = 8.4 Hz, 2H), 6.99 (d, *J* = 8.2 Hz, 2H), 6.80 (d, *J* = 7.9 Hz, 2H), 6.20 (s, 1H), 5.14 (s, 1H), 4.07 (s, 1H), 3.79 (s, 3H), 3.22 (s, 3H), 2.40 (s, 3H); **<sup>13</sup>C NMR** (100 MHz, CDCl<sub>3</sub>): δ 172.7, 160.4, 150.7, 144.1, 143.9, 134.7, 129.8, 129.6, 128.1, 124.4, 124.2, 114.7, 68.1, 55.4, 32.9, 21.6; **IR** (ATR):  $\tilde{\nu}$  = 3192, 2995, 1712, 1599, 1534, 1353,

1169, 1075, 817, 749  $\text{cm}^{-1}$ ; **HRMS** (ESI)  $m/z$ :  $[M+Na]^+$  Calcd for  $\text{C}_{23}\text{H}_{24}\text{N}_4\text{NaO}_8\text{S}_2^+$  571.0928, found 571.0930.

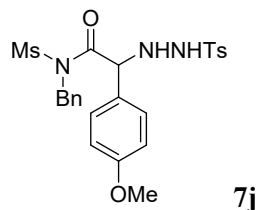

Sticky colorless oil (50.0 mg, 97%, EtOAc:Hex = 1:2);  **$^1\text{H}$  NMR** (400 MHz,  $\text{CDCl}_3$ ):  $\delta$  7.70 (d,  $J$  = 8.2 Hz, 2H), 7.40-7.28 (m, 3H), 7.26-7.21 (m, 4H), 7.05 (d,  $J$  = 8.7 Hz, 2H), 6.81 (d,  $J$  = 8.7 Hz, 2H), 6.39 (s, 1H), 5.10 (s, 1H), 4.95 (d of ABq,  $J$  = 16.4 Hz, 1H), 4.75 (d of ABq,  $J$  = 16.6 Hz, 1H), 3.77 (s, 2H), 2.93 (s, 3H), 2.40 (s, 3H);  **$^{13}\text{C}$  NMR** (100 MHz,  $\text{CDCl}_3$ ):  $\delta$  173.6, 160.3, 144.0, 135.4, 134.8, 129.9, 129.5, 129.0, 128.23, 128.20, 127.2, 124.7, 114.7, 67.7, 55.3, 48.8, 42.7, 21.6; **IR** (ATR):  $\tilde{\nu}$  = 3232, 3003, 1708, 1598, 1512, 1495, 1325, 1256, 1148, 1033, 750  $\text{cm}^{-1}$ ; **HRMS** (ESI)  $m/z$ :  $[M+Na]^+$  Calcd for  $\text{C}_{24}\text{H}_{27}\text{N}_3\text{NaO}_6\text{S}_2^+$  540.1233, found 540.1237.

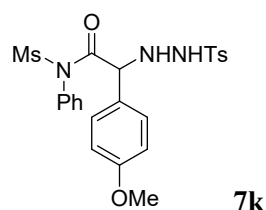

Yellow oil (45.2 mg, 90%, EtOAc:Hex = 1:1);  **$^1\text{H}$  NMR** (400 MHz,  $\text{CDCl}_3$ ):  $\delta$  7.76 (d,  $J$  = 7.9 Hz, 2H), 7.56-7.17 (m, 5H), 7.28 (d,  $J$  = 7.7 Hz, 2H), 6.85-6.68 (m, 4H), 6.58 (s, 1H), 4.40 (s, 1H), 4.26 (s, 1H), 3.79 (s, 3H), 3.50 (s, 3H), 2.42 (s, 3H);  **$^{13}\text{C}$  NMR** (100 MHz,  $\text{CDCl}_3$ ):  $\delta$  173.2, 160.2, 144.0, 134.8, 133.6, 130.2, 129.7, 129.6, 129.5, 128.2, 125.1, 124.9, 114.4, 67.7, 55.3, 42.2, 21.6; **IR** (ATR):  $\tilde{\nu}$  = 3216, 2997, 1701, 1609, 1511, 1356, 1252, 1157, 1030, 964  $\text{cm}^{-1}$ ; **HRMS** (ESI)  $m/z$ :  $[M+Na]^+$  Calcd for  $\text{C}_{23}\text{H}_{25}\text{N}_3\text{NaO}_6\text{S}_2^+$  526.1077, found 526.1075.

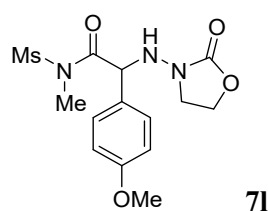

White solid (29.2 mg, 82%, EtOAc:Hex = 1:1); **<sup>1</sup>H NMR** (400 MHz, CDCl<sub>3</sub>): δ 7.34 (d, *J* = 8.7 Hz, 2H), 6.92 (d, *J* = 8.7 Hz, 2H), 5.35 (d, *J* = 4.0 Hz, 1H), 4.75 (d, *J* = 3.9 Hz, 1H), 4.27-4.21 (m, 2H), 3.81(s, 3H), 3.75 (ddd, *J* = 13.4, 11.5, 5.2 Hz, 1H), 3.89 (q, *J* = 8.4 Hz, 1H), 3.15 (s, 2H), 3.09 (s, 3H); **<sup>13</sup>C NMR** (100 MHz, CDCl<sub>3</sub>): δ 172.1, 160.4, 158.9, 130.2, 125.6, 114.7, 65.5, 61.8, 55.4, 47.6, 41.1, 32.4; **IR** (ATR):  $\tilde{\nu}$  = 3280, 3011, 1748, 1692, 1512, 1346, 1250, 1163, 966, 770 cm<sup>-1</sup>; **HRMS** (ESI) *m/z*: [M+Na]<sup>+</sup> Calcd for C<sub>14</sub>H<sub>19</sub>N<sub>3</sub>NaO<sub>6</sub>S<sup>+</sup> 380.0887, found 380.0882.

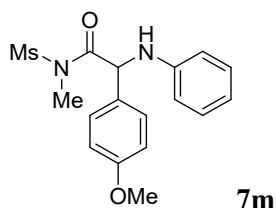

Sticky colorless oil (15.5 mg, 45%, EtOAc:Hex = 1:2); **<sup>1</sup>H NMR** (400 MHz, CDCl<sub>3</sub>): δ 7.38 (d, *J* = 8.7 Hz, 2H), 7.19 (t, *J* = 8.4 Hz, 2H), 6.94 (d, *J* = 8.7 Hz, 2H), 6.77 (t, *J* = 7.4 Hz, 1H), 6.69 (d, *J* = 7.7 Hz, 2H), 5.89 (s, 1H), 3.82 (s, 3H), 3.29 (s, 3H), 2.90 (s, 3H); **<sup>13</sup>C NMR** (100 MHz, CDCl<sub>3</sub>): δ 173.1, 156.0, 146.1, 129.6, 129.4, 127.9, 118.9, 114.8, 113.9, 59.9, 55.4, 40.8, 32.7; **IR** (ATR):  $\tilde{\nu}$  = 3376, 3018, 2838, 1693, 1602, 1511, 1348, 1250, 1163, 963 cm<sup>-1</sup>; **HRMS** (ESI) *m/z*: [M+Na]<sup>+</sup> Calcd for C<sub>17</sub>H<sub>20</sub>N<sub>2</sub>NaO<sub>4</sub>S<sup>+</sup> 371.1036, found 371.1032.

## 5. Synthetic applications

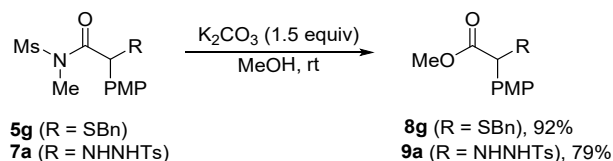

In a 4mL vial, imide **5g** (or **7a**) (0.10 mmol) was dissolved in methanol (1.0 mL) at room temperature. To this mixture was added  $\text{K}_2\text{CO}_3$  (20.7 mg, 0.15 mmol) and was stirred at room temperature for 30 minutes. The reaction mixture was poured onto a silica gel column and was eluted with EtOAc:Hex.

**8g**: sticky colorless oil (27.8 mg, 92%, EtOAc:Hex = 1:10);  $^1\text{H NMR}$  (400 MHz,  $\text{CDCl}_3$ ):  $\delta$  7.42-7.18 (m, 7H), 6.85 (d,  $J = 8.7$  Hz, 2H), 4.39 (s, 1H), 3.79 (s, 3H), 3.75 (d of ABq,  $J = 13.5$  Hz, 1H), 3.67 (s, 3H), 3.60 (d of ABq,  $J = 13.5$  Hz, 1H);  $^{13}\text{C NMR}$  (100 MHz,  $\text{CDCl}_3$ ):  $\delta$  171.4, 159.5, 137.3, 129.8, 129.1, 128.6, 127.7, 127.3, 114.1, 55.3, 52.7, 50.9, 36.2; **IR** (ATR):  $\tilde{\nu} = 3010, 2559, 1684, 1598, 1510, 1261, 1166, 1028, 750 \text{ cm}^{-1}$ ; **HRMS** (ESI)  $m/z$ :  $[\text{M}+\text{Na}]^+$  Calcd for  $\text{C}_{17}\text{H}_{18}\text{NaO}_3\text{S}^+$  325.0869, found 325.0876.

**9a**: sticky colorless oil (28.8 mg, 79%, EtOAc:Hex = 1:5);  $^1\text{H NMR}$  (400 MHz,  $\text{CDCl}_3$ ):  $\delta$  7.80 (d,  $J = 8.2$  Hz, 2H), 7.31 (d,  $J = 8.2$  Hz, 2H), 7.13 (d,  $J = 8.6$  Hz, 2H), 6.86 (d,  $J = 8.6$  Hz, 2H), 6.23 (d,  $J = 2.0$  Hz, 1H), 4.63 (d,  $J = 9.8$  Hz, 1H), 4.16 (dd,  $J = 9.8, 2.3$  Hz, 1H), 3.81 (s, 3H), 3.73 (s, 3H), 2.45 (s, 3H);  $^{13}\text{C NMR}$  (100 MHz,  $\text{CDCl}_3$ ):  $\delta$  172.7, 160.0, 144.0, 135.1, 129.7, 129.2, 128.2, 126.5, 114.3, 66.8, 55.3, 52.5, 21.6; **IR** (ATR):  $\tilde{\nu} = 3257, 3003, 2207, 1723, 1596, 1513, 1275, 1260, 1168, 1032, 750 \text{ cm}^{-1}$ ; **HRMS** (ESI)  $m/z$ :  $[\text{M}+\text{Na}]^+$  Calcd for  $\text{C}_{17}\text{H}_{20}\text{N}_2\text{NaO}_5\text{S}^+$  387.0985, found 387.0981.

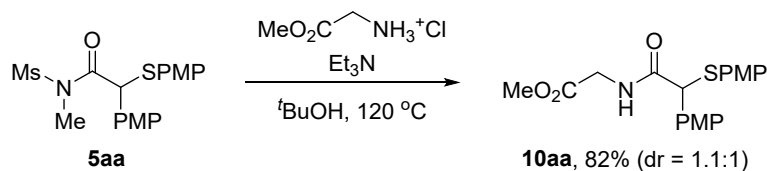

In a 4mL vial, imide **5aa** (19.8 mg, 0.05 mmol) and glycine methyl ester hydrochloride (31.4 mg, 0.25 mmol) was dissolved in  $t\text{BuOH}$  (0.5 mL). To this mixture was added triethylamine (25.3 mg, 0.25 mmol) and was capped under air. The resulting mixture was stirred at  $120^\circ\text{C}$  for 13 h. When the reaction was judged to be complete by TLC, reaction mixture was extracted with DCM (3 x 1 mL). The combined organic layers were dried ( $\text{MgSO}_4$ ) and concentrated in vacuo. The residue was poured onto

a silica gel column and was eluted with EtOAc:Hex (1:2~1:1) to afford **10aa** (15.4 mg, 82%) as yellow stick oil.

**10aa**: <sup>1</sup>H NMR (400 MHz, CDCl<sub>3</sub>): δ 7.36 (d, *J* = 8.7 Hz, 2H), 7.32 (d, *J* = 8.7 Hz, 2H), 7.20 (t, *J* = 5.4 Hz, 1H), 6.85 (d, *J* = 8.6 Hz, 2H), 6.81 (d, *J* = 8.6 Hz, 2H), 4.77 (s, 1H), 4.09 (dd of ABq, *J* = 18.5, 4.6 Hz, 1H), 4.02 (dd of ABq, *J* = 18.2, 5.1 Hz, 1H), 3.79 (s, 3H), 3.78 (s, 3H), 3.76 (s, 3H); <sup>13</sup>C NMR (100 MHz, CDCl<sub>3</sub>): δ 170.1, 169.9, 159.8, 159.4, 134.5, 129.5, 128.4, 124.2, 114.7, 114.2, 58.7, 55.4, 55.3, 52.5, 41.6.; IR (ATR):  $\tilde{\nu}$  = 3308, 3005, 2837, 2359, 1750, 1655, 1608, 1591, 1509, 1494, 1275, 1249, 1030, 829 cm<sup>-1</sup>; HRMS (ESI) *m/z*: [M+Na]<sup>+</sup> Calcd for C<sub>19</sub>H<sub>21</sub>NNaO<sub>5</sub>S<sup>+</sup> 398.1033, found 398.1040.

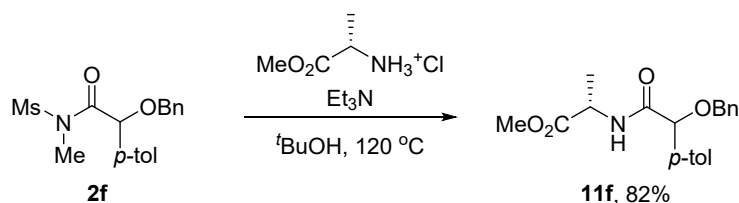

In a 4mL vial, imide **2f** (17.4 mg, 0.05 mmol) and alanine methyl ester hydrochloride (31.4 mg, 0.25 mmol) was dissolved in t-BuOH (0.5 mL). To this mixture was added triethylamine (25.3 mg, 0.25 mmol) and was capped under air. The resulting mixture was stirred at 120 °C for 13 h. When the reaction was judged to be complete by TLC, reaction mixture was extracted with DCM (3 x 1 mL). The combined organic layers were dried (MgSO<sub>4</sub>) and concentrated in vacuo. The residue was poured onto a silica gel column and was eluted with EtOAc:Hex (1:3) to afford diastereomeric mixture of **11f** (dr = 1.1:1, 12.8 mg, 75%) as yellow sticky oil.

(diastereomeric mixture) **11f**: <sup>1</sup>H NMR (500 MHz, CDCl<sub>3</sub>): δ 7.43-7.28 (m, 7H), 7.18 (d, *J* = 7.7 Hz, 1H), 7.17 (d, *J* = 8.3 Hz, 1H), 4.80 (s, 0.5H), 4.79 (s, 0.5H), 4.65-4.56 (m, 2H), 4.53 (d, *J* = 11.6 Hz, 1H), 4.43 (d, *J* = 11.8 Hz, 1H), 3.77 (s, 1.5H), 3.71 (s, 1.5H), 2.35 (s, 3H), 1.45 (d, *J* = 7.2 Hz, 1.5H), 1.39 (d, *J* = 7.2 Hz, 1.5H).

(diastereomeric mixture) <sup>13</sup>C NMR (126 MHz, CDCl<sub>3</sub>): δ <sup>13</sup>C NMR (126 MHz, CDCl<sub>3</sub>) δ 173.3, 173.1, 170.5, 170.3, 138.4, 138.3, 137.12, 137.08, 134.0, 133.9, 129.3, 128.6, 128.1, 128.0, 127.9, 127.4, 127.0, 81.0, 80.9, 71.3, 70.9, 52.44, 52.36, 47.6., 47.58, 21.21, 21.19, 18.44, 18.37.

IR (ATR):  $\tilde{\nu}$  = 3404, 2927, 2450, 1743, 1680, 1512, 1453, 1212, 1157, 1067 cm<sup>-1</sup>; HRMS (ESI) *m/z*: [M+Na]<sup>+</sup> Calcd for C<sub>20</sub>H<sub>23</sub>NNaO<sub>4</sub><sup>+</sup> 364.1519, found 364.1517.

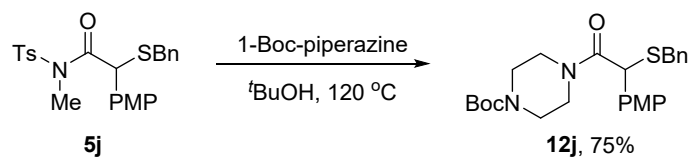

In a 4mL vial, imide **5j** (22.8 mg, 0.05 mmol) and 1-Boc-piperazine (46.6 mg, 0.25 mmol) was dissolved in *t*BuOH (0.5 mL) and was capped under air. The resulting mixture was stirred at 120 °C for 13 h. When the reaction was judged to be complete by TLC, reaction mixture was extracted with DCM (3 x 1 mL). The combined organic layers were dried (MgSO<sub>4</sub>) and concentrated in vacuo. The residue was poured onto a silica gel column and was eluted with EtOAc:Hex (1:2~1:1) to afford **12j** (17.0 mg, 75%) as colorless oil.

**12j**: <sup>1</sup>H NMR (400 MHz, CDCl<sub>3</sub>): δ 7.40-7.18 (m, 7H), 6.88 (d, *J* = 8.6 Hz, 2H), 4.50 (s, 1H), 3.81 (s, 3H), 3.73 (d of ABq, *J* = 13.6 Hz, 1H), 3.65-3.44 (m, 2H), 3.49 (d of ABq, *J* = 13.9 Hz, 1H), 3.43-3.33 (m, 1H), 3.32-3.24 (m, 1H), 3.23-3.15 (m, 1H), 3.14-3.04 (m, 2H), 3.02-2.84 (m, 1H), 1.43 (s, 9H); <sup>13</sup>C NMR (100 MHz, CDCl<sub>3</sub>): δ 168.2, 159.3, 154.5, 137.7, 129.9, 129.1, 128.6, 128.4, 127.3, 114.2, 80.3, 55.3, 45.5, 42.2, 35.7, 28.4 cm<sup>-1</sup>; IR (ATR):  $\tilde{\nu}$  = 3301, 2936, 2836, 1750, 1655, 1591, 1509, 1463, 1247, 1176, 1030, 829 cm<sup>-1</sup>; HRMS (ESI) *m/z*: [M+Na]<sup>+</sup> Calcd for C<sub>25</sub>H<sub>32</sub>N<sub>2</sub>NaO<sub>4</sub>S<sup>+</sup> 479.1975, found 479.1970.

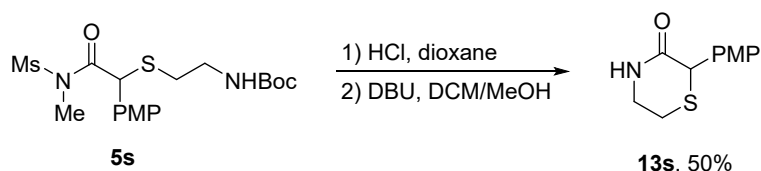

In a 4mL vial, imide **5s** (21.6 mg, 0.05 mmol) was dissolved in 1,4-dioxane (0.5 mL). To the reaction mixture was added HCl (4 M in 1,4-dioxane, 0.2 mL) and the resulting mixture was stirred at room temperature for 1 h. When the reaction was judged to be complete by TLC, reaction mixture was diluted with sat. NaHCO<sub>3</sub> (1 mL) and then extracted with DCM (3 x 1 mL). The combined organic layers were dried (MgSO<sub>4</sub>) and concentrated in vacuo. The residue was directly diluted with DCM/MeOH (1/1, 1 mL). To the reaction mixture was added DBU (7.6 mg, 0.05 mmol) and the resulting mixture was stirred at room temperature for 30 minutes. The residue was poured onto a silica gel column and was eluted with EtOAc:Hex (1:1~1:0) to afford **13s** (11.2 mg, 50%) as sticky colorless oil.

**13s**: <sup>1</sup>H NMR (400 MHz, CDCl<sub>3</sub>): δ 7.35 (d, *J* = 8.7 Hz, 2H), 7.34 (s, 1H), 6.90 (d, *J* = 8.7 Hz, 2H),



4.63 (s, 1H), 3.81 (s, 3H), 3.73-3.54 (m, 2H), 2.97-2.78 (m, 2H);  $^{13}\text{C}$  NMR (100 MHz,  $\text{CDCl}_3$ ):  $\delta$  170.2, 159.2, 129.9, 128.9, 114.0, 55.3, 45.8, 44.0, 25.7; IR (ATR):  $\tilde{\nu}$  = 3195, 3076, 2930, 1660, 1610, 1514, 1246, 1178, 1028, 908  $\text{cm}^{-1}$ ; HRMS (ESI)  $m/z$ :  $[\text{M}+\text{Na}]^+$  Calcd for  $\text{C}_{11}\text{H}_{13}\text{NNaO}_2\text{S}^+$  246.0559, found 246.0562.

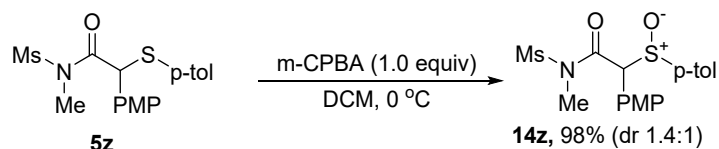

In a 4mL vial, imide **5z** (37.9 mg, 0.10 mmol) was dissolved in dichloromethane (1 mL) and the mixture was cooled to 0 °C. To the reaction mixture was added 3-chloroperbenzoic acid (22.4 mg, <77%wt., 0.1 mmol) and the resulting mixture was stirred at 0 °C for 10 minutes. When the reaction was judged to be complete by TLC, reaction mixture was diluted with sat.  $\text{NaHCO}_3$  (1 mL) and then extracted with DCM (3 x 1 mL). The combined organic layers were dried ( $\text{MgSO}_4$ ) and concentrated in vacuo. The residue was poured onto a silica gel column and was eluted with EtOAc:Hex (1:2) to afford **14z** (38.7 mg, 98%, d.r = 1.4:1) as white solid.

(major diastereomer) **14z**;  $^1\text{H}$  NMR (400 MHz,  $\text{CDCl}_3$ ):  $\delta$  7.17-7.06 (m, 4H), 7.02 (d,  $J$  = 8.1 Hz, 2H), 6.73 (d,  $J$  = 8.0 Hz, 2H), 5.55 (s, 1H), 3.77 (s, 3H), 3.31 (s, 3H), 3.23 (s, 3H), 2.35 (s, 3H).

(minor diastereomer) **14z'**;  $^1\text{H}$  NMR (400 MHz,  $\text{CDCl}_3$ ):  $\delta$  7.46 (d,  $J$  = 7.6 Hz, 2H), 7.27 (d,  $J$  = 7.7 Hz, 2H), 7.23 (d,  $J$  = 8.0 Hz, 2H), 6.90 (d,  $J$  = 8.0 Hz, 2H), 5.29 (s, 1H), 3.81 (s, 3H), 3.09 (s, 3H), 2.61 (s, 3H), 2.41 (s, 3H);

(diastereomeric mixture) **14z** and **14z'**  $^{13}\text{C}$  NMR (100 MHz,  $\text{CDCl}_3$ ):  $\delta$  169.2, 168.4, 160.8, 160.4, 142.4, 142.3, 139.5, 137.9, 131.6, 131.1, 129.7, 129.4, 125.43, 125.37, 120.0, 119.7, 114.4, 114.2, 77.8, 55.4, 55.3, 42.2, 40.5, 33.1, 32.8, 21.51, 21.50.

IR (ATR):  $\tilde{\nu}$  = 3002, 1679, 1607, 1510, 1352, 1256, 1029, 965, 768  $\text{cm}^{-1}$ ; HRMS (ESI)  $m/z$ :  $[\text{M}+\text{Na}]^+$  Calcd for  $\text{C}_{18}\text{H}_{21}\text{NNaO}_5\text{S}_2^+$  418.0753, found 418.0755.

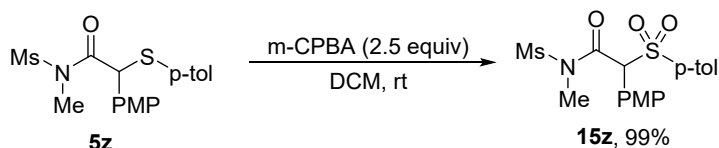

In a 4 mL vial, imide **5z** (37.9 mg, 0.10 mmol) was dissolved in dichloromethane (1 mL) and the mixture was cooled to 0 °C. To the reaction mixture was added 3-chloroperbenzoic acid (56.0 mg,

<77%wt., 0.25 mmol) and the resulting mixture was stirred at room temperature for 30 minutes. When the reaction was judged to be complete by TLC, reaction mixture was diluted with sat. NaHCO<sub>3</sub> (1 mL) and then extracted with DCM (3 x 1 mL). The combined organic layers were dried (MgSO<sub>4</sub>) and concentrated in vacuo. The residue was poured onto a silica gel column and was eluted with EtOAc:Hex (1:3) to afford **15z** (40.8 mg, 99%) as white solid.

**15z**: <sup>1</sup>H NMR (400 MHz, CDCl<sub>3</sub>): δ 7.43 (d, *J* = 8.0 Hz, 2H), 7.31-7.14 (m, 4H), 6.80 (d, *J* = 8.7 Hz, 2H), 6.27 (s, 1H), 3.79 (s, 3H), 3.27 (s, 3H), 3.13 (s, 3H), 2.42 (s, 3H); <sup>13</sup>C NMR (100 MHz, CDCl<sub>3</sub>): δ 165.4, 160.8, 145.3, 133.2, 132.0, 130.2, 129.2, 119.5, 114.1, 73.3, 55.4, 41.2, 33.2, 21.7; **IR** (ATR):  $\tilde{\nu}$  = 2931, 1694, 1607, 1511, 1355, 1256, 1147, 1079, 844 cm<sup>-1</sup>; **HRMS** (ESI) *m/z*: [M+Na]<sup>+</sup> Calcd for C<sub>18</sub>H<sub>21</sub>NNaO<sub>6</sub>S<sub>2</sub><sup>+</sup> 434.0703, found 434.0710.

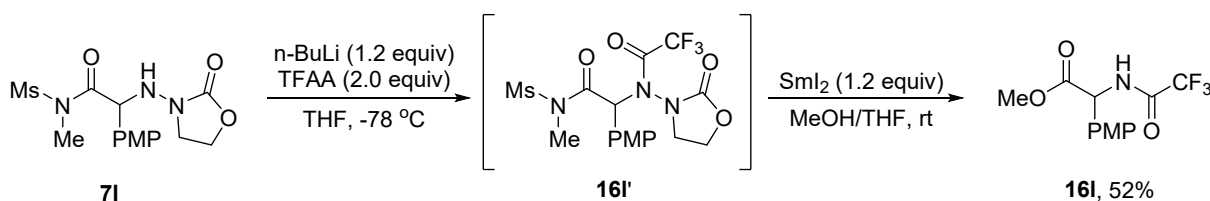

In a flame-dried 4mL vial, imide **71** (17.9 mg, 0.05 mmol) was dissolved in THF (0.5 mL) and the mixture was cooled to -78°C under Ar. To the reaction mixture was added *n*-BuLi (1.6 M in hexane, 34 μL, 0.055 mmol) and the resulting mixture was stirred at -78 °C. After 30 minutes, TFAA (15.8 mg, 0.075 mmol) was added dropwise and the mixture was stirred at -78 °C. When the reaction was judged to be complete by TLC, reaction mixture was diluted with sat. NH<sub>4</sub>Cl (1 mL) and was brought to room temperature. The mixture was extracted with DCM (3 x 1 mL). The combined organic layers were dried (MgSO<sub>4</sub>) and concentrated in vacuo. The residue was poured onto a silica gel column and was eluted with EtOAc:Hex (1:4) to afford **161'**. The crude **161'** was re-dissolved in MeOH (100 μL) and the mixture was treated with SmI<sub>2</sub> (0.1 M in THF, 4 mL, 0.4 mmol) at room temperature. After stirring the mixture for 3 hours, solvent was evaporated, and the residue was poured onto a silica gel column and was eluted with EtOAc:Hex (1:2) to afford **161** (7.6 mg, 52%) as brown liquid.

**161**: <sup>1</sup>H NMR (400 MHz, CDCl<sub>3</sub>): δ 7.45-7.21 (m, 3H), 6.91 (d, *J* = 8.7 Hz, 2H), 5.80 (d, *J* = 8.0 Hz, 1H), 3.81 (s, 3H), 3.77 (s, 3H); <sup>13</sup>C NMR (100 MHz, Acetone D<sub>6</sub>): δ 169.9, 158.0, 156.4 (d, *J* = 37.1 Hz), 129.5, 125.6, 116.0 (d, *J* = 285.2 Hz), 115.6, 56.6, 52.0, 29.7; **IR** (ATR):  $\tilde{\nu}$  = 3195, 3076, 2930, 1660, 1610, 1514, 1246, 1178, 1028, 908 cm<sup>-1</sup>; **HRMS** (ESI) *m/z*: [M+Na]<sup>+</sup> Calcd for C<sub>12</sub>H<sub>12</sub>F<sub>3</sub>NNaO<sub>4</sub><sup>+</sup> 314.0611, found 314.0615.
